# Supplementary material for: Phosphine-catalyzed asymmetric aza-Morita–Baylis–Hillman reaction of endocyclic ketimines and activated alkenes
Source: Royal Society of Chemistry journal article supplement (doi:10.1039/d3qo01047c), 2023-01-01
Supplement: d3qo01047c1.pdf [file d3qo01047c1.pdf]

## Supporting Information

### **Phosphine-catalyzed asymmetric *aza*-Morita-Baylis-Hillman reaction of endocyclic ketimines and activated alkenes**

Yue Lu,<sup>a#</sup> Fangfang Zhu,<sup>a#</sup> Xinyu Liu,<sup>a</sup> and De Wang<sup>\*,a,b,c</sup>

<sup>a</sup> Key Laboratory of Marine Drugs, Ministry of Education, School of Medicine and Pharmacy,  
Ocean University of China, Qingdao 266071, China.

<sup>b</sup> State Key Laboratory of Natural and Biomimetic Drugs, Peking University, Beijing 100191,  
China.

<sup>c</sup> Laboratory for Marine Drugs and Bioproducts, Qingdao National Laboratory for Marine  
Science and Technology, Qingdao 266237, China.

[wangde@ouc.edu.cn](mailto:wangde@ouc.edu.cn)

### **Table of Contents**

|                                                            |             |
|------------------------------------------------------------|-------------|
| <b>1. General information</b>                              | <b>S2</b>   |
| <b>2. Screening of reaction conditions</b>                 | <b>S3</b>   |
| <b>3. Experimental procedure and characterization data</b> | <b>S5</b>   |
| <b>4. Synthetic applications</b>                           | <b>S66</b>  |
| <b>5. References</b>                                       | <b>S78</b>  |
| <b>6. X-ray data of compounds 3aa and 3te</b>              | <b>S79</b>  |
| <b>7. NMR Spectra</b>                                      | <b>S82</b>  |
| <b>8. Tertiary amine catalyzed the reaction</b>            | <b>S152</b> |

## **1. General Information**

$^1\text{H}$  (400 MHz) and  $^{13}\text{C}$  NMR (100 MHz or 125 MHz) spectra were recorded on JEOL (400 MHz) or Agilent (500 MHz) [7.26 ppm for  $^1\text{H}$  NMR, 77.00 ppm for  $^{13}\text{C}$  NMR as internal references when  $\text{CDCl}_3$  used]. High-resolution mass spectra were recorded by ESI method. The used organic solvents were dried by standard methods if it was necessary. Optical rotations were determined at 589 nm (sodium D line) by using a Perkin-Elmer-341 MC digital polarimeter;  $[\alpha]_{\text{D}}$  values are given in unit of  $10 \text{ deg}^{-1} \text{ cm}^2 \text{ g}^{-1}$ . Chiral HPLC was performed on a SHIMADZU LC-20AT LC System with chiral columns [Chiralpak AD-H, OD-H, IB-H and IF-H columns 4.6\*250 mm, (Daicel Chemical Ind., Ltd.)]. Commercially obtained reagents were used without further purification. All these reactions were monitored by TLC with silica-gel-coated plates. Flash column chromatography was carried out by using silica gel at increased pressure.

All the racemic products were carried out with tertiary phosphine ( $\text{PMePh}_2$ , 20 mol%) or tertiary amine (DABCO, 20 mol%) as catalyst in ethyl acetate at room temperature.

## 2. Screening of reaction conditions

**Table S1. Optimization of the reaction conditions** <sup>a-c</sup>

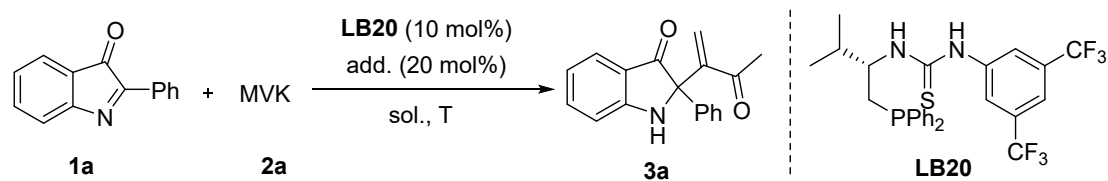

| Entry | Sol.                                            | T [°C] | add.             | Yield [%] | ee [%] |
|-------|-------------------------------------------------|--------|------------------|-----------|--------|
| 1     | toluene                                         | 25     | None             | 99        | 75     |
| 2     | DCM                                             | 25     | None             | 27        | 79     |
| 3     | MeCN                                            | 25     | None             | 79        | 81     |
| 4     | fluorobenzene                                   | 25     | None             | trace     | -      |
| 5     | <i>o</i> -xylene                                | 25     | None             | 99        | 79     |
| 6     | Et <sub>2</sub> O                               | 25     | None             | 74        | 87     |
| 7     | MTBE                                            | 25     | None             | 71        | 80     |
| 8     | THF                                             | 25     | None             | 24        | 88     |
| 9     | EtOAc                                           | 25     | None             | 99        | 88     |
| 10    | CH <sub>3</sub> CO <sub>2</sub> <sup>t</sup> Bu | 25     | None             | 99        | 83     |
| 11    | CH <sub>3</sub> CO <sub>2</sub> CH <sub>3</sub> | 25     | None             | 81        | 87     |
| 12    | HCO <sub>2</sub> Me                             | 25     | None             | 44        | 43     |
| 13    | HCO <sub>2</sub> Et                             | 25     | None             | trace     | -      |
| 14    | CO(OCH <sub>3</sub> ) <sub>2</sub>              | 25     | None             | 99        | 85     |
| 15    | EtOAc                                           | 25     | PhOH             | 99        | 81     |
| 16    | EtOAc                                           | 25     | 2-chlorophenol   | 99        | 55     |
| 17    | EtOAc                                           | 25     | PhCOOH           | trace     | -      |
| 18    | EtOAc                                           | 25     | MeOH             | 99        | 86     |
| 19    | EtOAc                                           | 25     | H <sub>2</sub> O | 99        | 83     |
| 20    | EtOAc                                           | 25     | 4Å MS            | 99        | 87     |
| 21    | EtOAc                                           | 10     | None             | 99        | 87     |
| 22    | EtOAc                                           | 0      | None             | 99        | 88     |
| 23    | EtOAc                                           | -10    | None             | 82        | 69     |

[a] All reactions were run with **1a** (0.05 mmol), **2a** (0.075 mmol) and **LB20** (10 mol%) under argon atmosphere in solvents (1.0 ml) at indicated temperature for 6 h. [b] Isolated yields. [c] ee values were determined by stationary chiral HPLC.

**Table S2. The screening of chiral phosphines** <sup>a-c</sup>

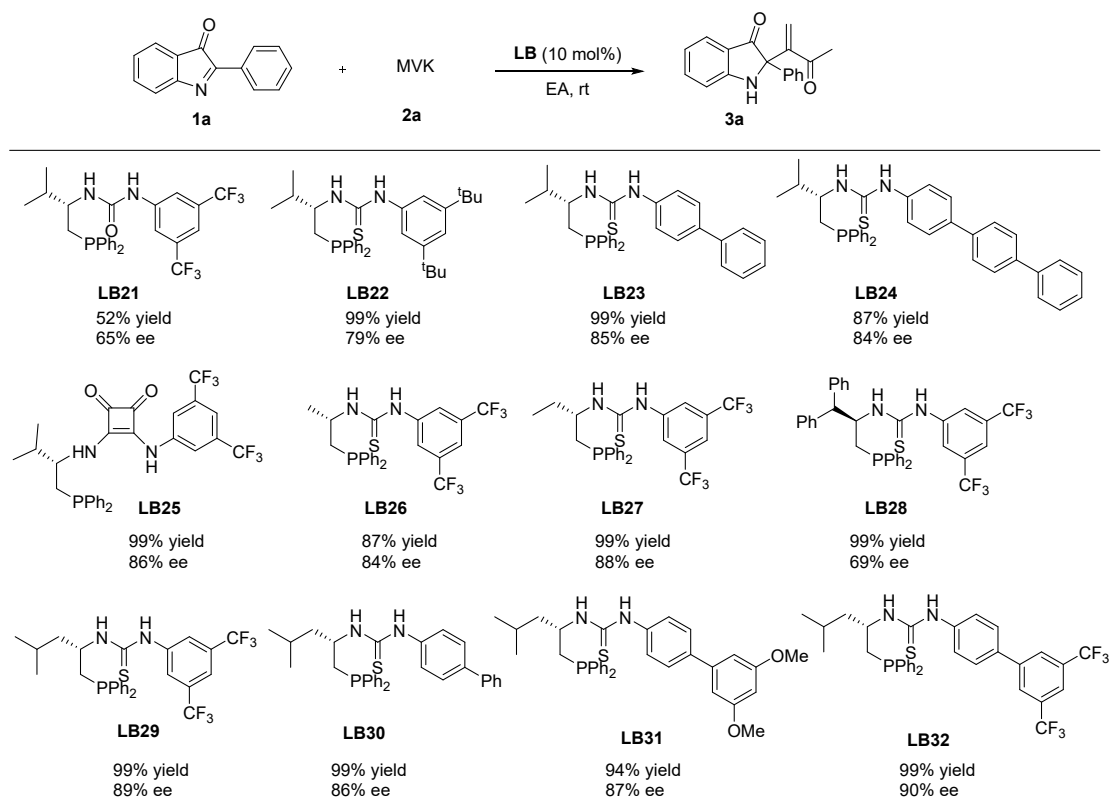

[a] All reactions were run with **1a** (0.05 mmol), **2a** (0.075 mmol) and **LB** (10 mol%) under nitrogen atmosphere in EtOAc (1.0 ml) at room temperature for 6h. [b] Isolated yields. [c] ee values were determined by stationary chiral HPLC.

### 3. Experimental procedure and characterization data

#### General procedure (I) for the synthesis of C2-substituted-3H-indol-3-one (1a-1x).

Method A:

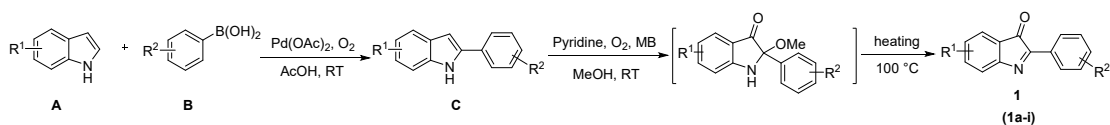

Method B:

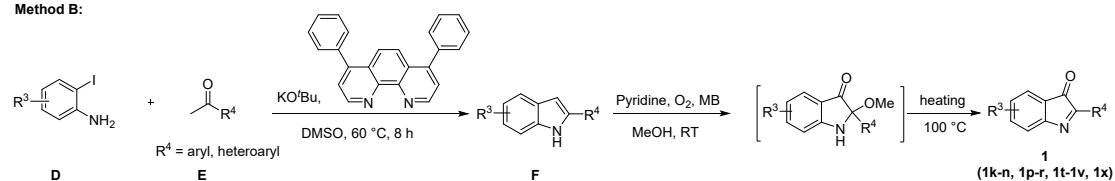

Method C:

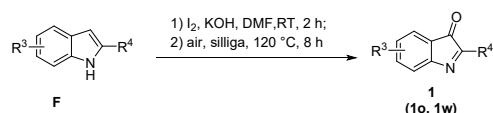

Method D:

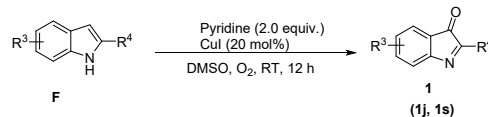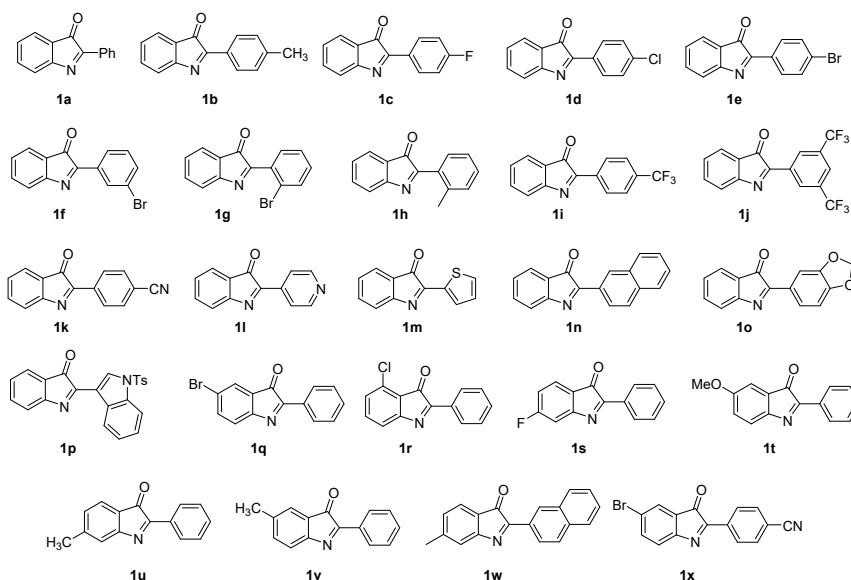

Compounds **1** were prepared according to the modified procedure of literature. <sup>[1]</sup>

#### General Procedure I:

**Method A:** Indole derivatives (**A**) (1.0 equiv.), aryl boronic acid (**B**) (1.3 equiv.) and Pd(OAc)<sub>2</sub> (0.1 equiv.) were added to an oven dried Schlenk flask. AcOH was added by syringe and resulting solution was degassed twice and refilled with O<sub>2</sub>. The reaction mixture was stirred for 8 hrs at room temperature. Then AcOH was recovered by distillation under reduced pressure, and the residue was dissolved in DCM, washed with aqueous NaHCO<sub>3</sub>. The organic layer was dried over anhydrous Na<sub>2</sub>SO<sub>4</sub>. After removal

of the solvent, the product (**C**) was purified by flash chromatography on silica gel.

Irradiation of a methanol solution of 2-arylindoles (**C**, 1.0 equiv.) in the presence of methylene blue (MB, 0.1 equiv.) and pyridine (1 M) was carried out with a lighting operated at 180 V at 20 °C under oxygen bubbling. After complete disappearance of the starting 2-arylindoles (TLC monitoring), the reaction mixture was concentrated in vacuo, diluted with ether and washed with water. The ether layer was dried over anhydrous Na<sub>2</sub>SO<sub>4</sub>, evaporated to dryness and heated at 100 °C under reduced pressure for 1 h. The product **1** was purified by flash chromatography on silica gel (Compounds **1a-i** were prepared by method A).

**Method B:** Reactions were performed in a dry Schlenk flask equipped with a magnetic stirring bar under N<sub>2</sub>. Aniline derivatives (**D**) (1.0 equiv.), KO<sup>t</sup>Bu (3.0 equiv.), and bathophenanthroline (0.2 equiv.) were added to the Schlenk tube. A solution of ketone (**E**) (2.0 equiv.) was added through a syringe and the reaction mixture was stirred at 60 °C for 8 hrs. After the solution was cooled to room temperature, the reaction was quenched with water. The organic layer was extracted with ethyl acetate and the combined layer was concentrated under reduced pressure. The product (**F**) was purified by flash chromatography on silica gel. Then the procedure for the preparation of **1** followed method A from compound **F** (Compounds **1k-n**, **1p-r**, **1t-v** and **1x** were prepared by method B).

**Method C:** A solution of I<sub>2</sub> (1.0 equiv.) in DMF was dropped into a solution of **F** (1.0 equiv.) and KOH (2.5 equiv.) in DMF at room temperature and stirred for 2 hrs. The mixture was then purged with air, silica was added and the mixture heated to 120 °C. Upon cooling, water was added and the mixture extracted with ethyl acetate. The organic extracts were combined, dried over anhydrous Na<sub>2</sub>SO<sub>4</sub>, filtered and concentrated in vacuum. Purification by flash chromatography on silica gel eluting with petroleum ether/ethyl acetate to give product **1** (Compounds **1o** and **1w** were prepared by method C).

**Method D:** Reactions were performed in a dry Schlenk flask equipped with a magnetic stirring bar under N<sub>2</sub>. Compound **F** (1.0 equiv.), CuI (0.2 equiv.) were added to the Schlenk flask, DMSO was added as solvent, then pyridine (2.0 equiv.) was

added through a syringe, the resulting solution was degassed twice and refilled with O<sub>2</sub>. The reaction mixture was stirred for 12 hours at room temperature, water was added and the mixture extracted with ethyl acetate. The organic extracts were combined, dried over anhydrous Na<sub>2</sub>SO<sub>4</sub>, filtered and concentrated in vacuum. The crude materials were purified by flash chromatography on silica gel eluting with petroleum ether/ethyl acetate to give product **1** (Compounds **1j** and **1s** were prepared by method D).

Compounds **1a-1i**, **1m-1n** and **1p-1v** were known compounds. The spectra data were correspondence with the literature data. [1]

#### 2-(3,5-bis(trifluoromethyl)phenyl)-3H-indol-3-one (**1j**)

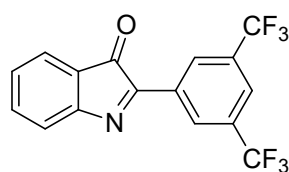

**1j**

Compound **1j** (175 mg, 73% yield) was obtained as a red solid following the *general procedure I* (Method D) from **F** (0.70 mmol, 240 mg), CuI (0.14 mmol, 26.7 mg), pyridine (1.4 mmol, 110.6 mg, 110  $\mu$ L) in DMSO.

<sup>1</sup>H NMR (400 MHz, DMSO-*d*<sub>6</sub>)  $\delta$  8.73 (s, 2H), 8.36 (s, 1H), 7.70-7.63 (m, 2H), 7.55 (d, *J* = 7.6 Hz, 1H), 7.42 (t, *J* = 7.6 Hz, 1H); <sup>13</sup>C NMR (100 MHz, DMSO-*d*<sub>6</sub>)  $\delta$  191.0, 159.2, 158.1, 136.9, 132.6, 130.8 (q, *J* = 33.1 Hz), 129.4, 128.7, 124.9, 124.7, 123.1, 123.0 (q, *J* = 271.4 Hz), 122.5; <sup>19</sup>F NMR (376 MHz, DMSO-*d*<sub>6</sub>)  $\delta$  -61.5 (s); HRMS Calcd. for C<sub>16</sub>H<sub>8</sub>ONF<sub>6</sub><sup>+</sup> [M+H]<sup>+</sup>: 344.0505, found: 344.0500; **M.p.**: 102-104 °C.

#### 4-(3-oxo-3H-indol-2-yl)benzonitrile (**1k**)

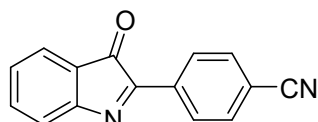

**1k**

Compound **1k** (206 mg, 34% yield) was obtained as a red solid following the *general procedure I* (Method B) from **F** (2.65 mmol, 578 mg), MB (0.265 mmol, 84.8 mg),

pyridine (2.5 mL) in MeOH.

**<sup>1</sup>H NMR** (400 MHz, CDCl<sub>3</sub>) δ 8.49 (d, *J* = 8.4 Hz, 2H), 7.76 (d, *J* = 8.4 Hz, 2H), 7.60-7.56 (m, 2H), 7.45 (d, *J* = 8.0 Hz, 1H), 7.32 (t, *J* = 7.6 Hz, 1H); **<sup>13</sup>C NMR** (100 MHz, CDCl<sub>3</sub>) δ 192.4, 159.6, 159.0, 137.0, 134.0, 132.4, 129.4, 129.3, 125.0, 122.8, 122.6, 118.3, 115.1; **HRMS** Calcd. for C<sub>15</sub>H<sub>9</sub>ON<sub>2</sub><sup>+</sup> [M+H]<sup>+</sup>: 233.0709, found: 233.0703; **M.p.**: 179-181 °C.

### 2-(pyridin-4-yl)-3*H*-indol-3-one (**1l**)

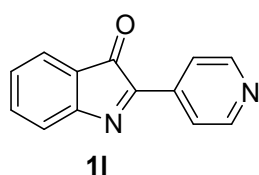

Compound **1l** (51.1 mg, 12% yield) was obtained as a red solid following the *general procedure I* (Method B) from **F** (2 mmol, 388 mg), MB (0.2 mmol, 64 mg), pyridine (2 mL) in MeOH.

**<sup>1</sup>H NMR** (400 MHz, CDCl<sub>3</sub>) δ 8.78 (d, *J* = 4.8 Hz, 2H), 8.19 (dd, *J* = 4.8, 1.6 Hz, 2H), 7.61-7.57 (m, 2H), 7.49-7.47 (m, 1H), 7.36-7.32 (m, 1H); **<sup>13</sup>C NMR** (100 MHz, CDCl<sub>3</sub>) δ 192.1, 159.8, 158.9, 150.5, 137.0, 136.9, 129.5, 125.0, 122.9, 122.8, 122.3; **HRMS** Calcd. for C<sub>13</sub>H<sub>9</sub>ON<sub>2</sub><sup>+</sup> [M+H]<sup>+</sup>: 209.0715, found: 209.0706; **M.p.**: 138-140 °C.

### 2-(benzo[*d*][1,3]dioxol-5-yl)-3*H*-indol-3-one (**1o**).

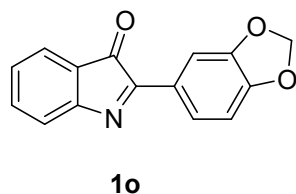

Compound **1o** (106 mg, 37% yield) was obtained as a red solid following the *general procedure I* (Method C) from **F** (1.14 mmol, 270 mg), KOH (2.85 mmol, 160 mg), I<sub>2</sub> (1.14 mmol, 290 mg) and silica gel (570 mg) in DMF.

**<sup>1</sup>H NMR** (400 MHz, CDCl<sub>3</sub>) δ 8.09 (dd, *J* = 8.4, 1.6 Hz, 1H), 7.85 (d, *J* = 1.6 Hz, 1H), 7.53-7.50 (m, 2H), 7.37-7.34 (m, 1H), 7.24-7.20 (m, 1H), 6.91 (d, *J* = 8.0 Hz, 1H), 6.05 (s, 2H); **<sup>13</sup>C NMR** (100 MHz, CDCl<sub>3</sub>) δ 193.8, 160.7, 159.5, 151.4, 148.3, 136.8, 127.8,



125.6, 124.7, 124.3, 123.2, 121.6, 108.7, 108.4, 101.7; **HRMS** Calcd. for  $C_{15}H_{10}NO_3^+$   $[M+H]^+$ : 252.0655, found: 252.0653; **M.p.**: 141-143 °C.

**6-Methyl-2-(naphthalen-2-yl)-3H-indol-3-one (1w).**

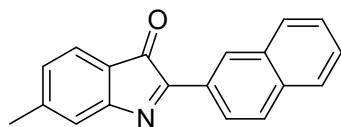

**1w**

Compound **1w** (64.9 mg, 20% yield) was obtained as a red solid following the *general procedure I* (Method C) from **F** (1.2 mmol, 308 mg), KOH (3 mmol, 168 mg),  $I_2$  (1.2 mmol, 305 mg) and silica gel (600 mg) in DMF.

**$^1H$  NMR** (400 MHz,  $CDCl_3$ )  $\delta$  9.03 (s, 1H), 8.37 (dd,  $J = 8.8, 1.6$  Hz, 1H), 8.00 (d,  $J = 7.6$  Hz, 1H), 7.92 (d,  $J = 8.4$  Hz, 1H), 7.86 (d,  $J = 7.6$  Hz, 1H), 7.60-7.52 (m, 2H), 7.48 (d,  $J = 7.2$  Hz, 1H), 7.25 (s, 1H), 7.06 (d,  $J = 7.2$  Hz, 1H), 2.45 (s, 3H);  **$^{13}C$  NMR** (100 MHz,  $CDCl_3$ )  $\delta$  193.2, 161.5, 160.4, 148.6, 135.0, 133.0, 131.3, 129.6, 128.7, 128.5, 128.2, 127.8, 127.6, 126.6, 124.8, 124.7, 123.0, 121.0, 22.4; **HRMS** Calcd. for  $C_{19}H_{14}ON^+$   $[M+H]^+$ : 272.1075, found: 272.1077; **M.p.**: 163-165 °C.

**4-(5-Bromo-1H-indol-2-yl)benzonitrile (1x)**

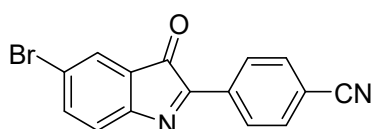

**1x**

Compound **1x** (185.7 mg, 40% yield) was obtained as a red solid following the *general procedure I* (Method B) from **F** (1.5 mmol, 443 mg), MB (0.15 mmol, 48 mg) and pyridine (1.5 mL) in MeOH.

**$^1H$  NMR** (400 MHz,  $CDCl_3$ )  $\delta$  8.49 (d,  $J = 8.4$  Hz, 2H), 7.78 (d,  $J = 8.4$  Hz, 2H), 7.71 (td,  $J = 8.0, 2.0$  Hz, 2H), 7.36 (d,  $J = 8.0$  Hz, 1H);  **$^{13}C$  NMR** (125 MHz,  $CDCl_3$ )  $\delta$  191.4, 159.3, 157.7, 139.3, 133.6, 132.5, 129.5, 128.2, 124.2, 124.0, 122.9, 118.2, 115.4; **HRMS** Calcd. for  $C_{15}H_8N_2OBr^+$   $[M+H]^+$ : 310.9815, found: 310.9807; **M.p.**: 259-261 °C.

## Structures of compounds 2

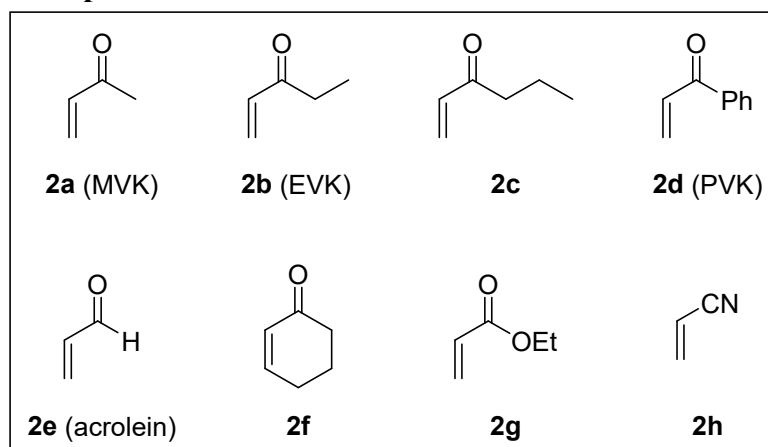

Compounds **2a-2c** and **2e-2h** are commercially available, using directly without any purification. Compound **2d** (PVK) was prepared according to literature. [2]

## General procedure (II) for the synthesis of chiral phosphines.

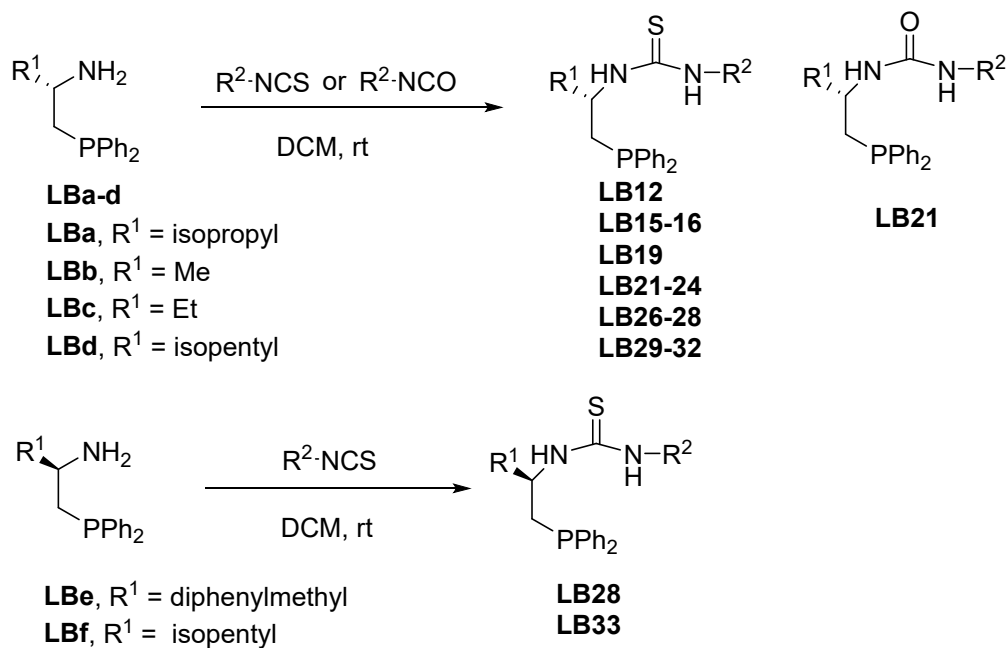

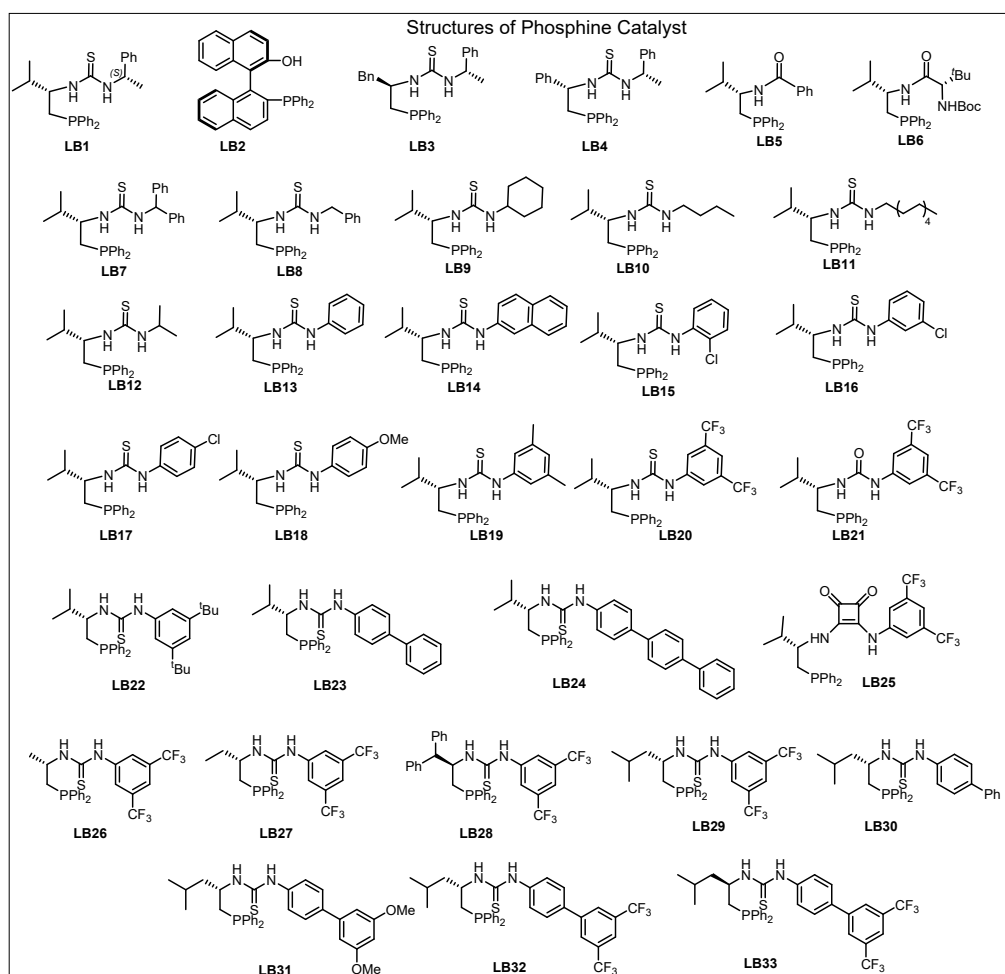

**LBa-f**, isothiocyanate and isocyanate was prepared according to the reported literature.<sup>[3,4]</sup> **LB1-11**, **LB13-14**, **LB17-18**, **LB20** and **LB25** were known compounds.<sup>[5]</sup>

**Procedure (II):** To a solution of **LBa-f** (1.0 eq) in DCM under N<sub>2</sub> atmosphere was added isothiocyanate or isocyanate (1.2 eq), and the reaction mixture was stirred at room temperature for 24 hrs. Solvent was then removed under reduced pressure, and the residue was directly subjected to column chromatographic separation on silica gel (hexane/ethyl acetate = 15:1 to 10:1) to afford chiral phosphines (**LB12**, **LB15-16**, **LB19**, **LB21-24**, **LB26-33**) as white solid.

**(S)-1-(1-(diphenylphosphaneyl)-3-methylbutan-2-yl)-3-isopropylthiourea (LB12)**

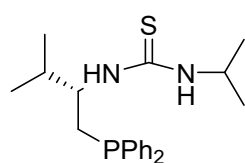

**LB12**

Compound **LB12** (70 mg, 94% yield) was obtained as a white solid following the *general procedure II* from **LBa** (0.2 mmol, 54.2 mg) and 2-isothiocyanatopropane (0.24 mmol, 24 mg, 26  $\mu$ L) stirred for 24 hours.

$^1\text{H NMR}$  (400 MHz,  $\text{CDCl}_3$ )  $\delta$  7.47-7.41 (m, 4H), 7.35-7.31 (m, 6H), 5.75 (brs, 1H), 4.28 (brs, 1H), 3.79 (brs, 1H), 2.42 (dd,  $J = 14.0, 4.8$  Hz, 1H), 2.33-2.28 (m, 1H), 2.19-2.10 (m, 1H), 1.09 (dd,  $J = 6.4, 1.6$  Hz, 6H), 0.91 (t,  $J = 6.4$  Hz, 6H);  $^{13}\text{C NMR}$  (100 MHz,  $\text{CDCl}_3$ )  $\delta$  179.8, 138.2 (d,  $J = 11.8$  Hz), 132.8 (d,  $J = 19.2$  Hz), 132.6 (d,  $J = 18.9$  Hz), 128.74, 128.66, 128.50 (d,  $J = 6.8$  Hz), 128.47 (d,  $J = 6.9$  Hz), 99.8, 57.6, 45.4, 32.0 (d,  $J = 8.9$  Hz), 31.2 (d,  $J = 12.1$  Hz), 22.4 (d,  $J = 9.6$  Hz), 18.7, 18.0, 14.0;  $^{31}\text{P NMR}$  (160 MHz,  $\text{CDCl}_3$ )  $\delta$  -23.7; **HRMS** Calcd. for  $\text{C}_{21}\text{H}_{30}\text{N}_2\text{PS}^+$   $[\text{M}+\text{H}]^+$ : 373.1862, found: 373.1854; **M.p.**: 105-106  $^\circ\text{C}$ ;  $[\alpha]_{\text{D}}^{20} = +2.0$  (c 0.05,  $\text{CH}_2\text{Cl}_2$ ).

**(S)-1-(2-chlorophenyl)-3-(1-(diphenylphosphaneyl)-3-methylbutan-2-yl)thiourea (LB15)**

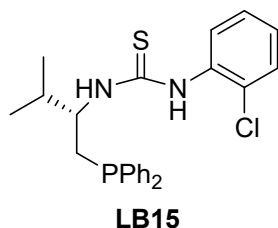

Compound **LB15** (83.1 mg, 94% yield) was obtained as a white solid following the *general procedure II* from **LBa** (0.2 mmol, 54.2 mg) and 1-chloro-2-isothiocyanatobenzene (0.24 mmol, 40.7 mg, 31  $\mu$ L) stirred for 24 hours.

$^1\text{H NMR}$  (400 MHz,  $\text{CDCl}_3$ )  $\delta$  7.77 (brs, 1H), 7.49-7.41 (m, 5H), 7.34-7.17 (m, 9H), 6.06 (brs, 1H), 4.60 (brs, 1H), 2.43-2.31 (m, 2H), 2.16 (h,  $J = 6.4$  Hz, 1H), 0.87 (dd,  $J = 11.2, 6.8$  Hz, 6H);  $^{13}\text{C NMR}$  (100 MHz,  $\text{CDCl}_3$ )  $\delta$  180.1, 138.0 (d,  $J = 11.9$  Hz), 133.4, 132.8 (d,  $J = 4.8$  Hz), 132.6 (d,  $J = 4.8$  Hz), 130.6, 129.7, 128.7, 128.5, 128.4, 128.3, 127.8 (d,  $J = 11.1$  Hz), 126.8, 58.5 (d,  $J = 14.3$  Hz), 31.54 (d,  $J = 8.4$  Hz), 31.49 (d,  $J = 14.7$  Hz), 18.7, 17.9;  $^{31}\text{P NMR}$  (160 MHz,  $\text{CDCl}_3$ )  $\delta$  -24.2; **HRMS** Calcd. for  $\text{C}_{24}\text{H}_{27}\text{ClN}_2\text{PS}^+$   $[\text{M}+\text{H}]^+$ : 441.1327, found: 441.1319; **M.p.**: 43-45  $^\circ\text{C}$ ;  $[\alpha]_{\text{D}}^{20} = +63.6$  (c 0.11,  $\text{CH}_2\text{Cl}_2$ ).

**(S)-1-(3-chlorophenyl)-3-(1-(diphenylphosphaneyl)-3-methylbutan-2-yl)thiourea (LB16)**

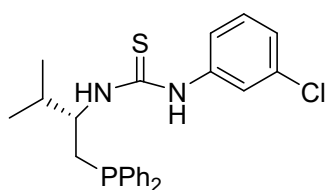

**LB16**

Compound **LB16** (88 mg, 91% yield) was obtained as a white solid following the *general procedure II* from **LBa** (0.22 mmol, 59.6 mg) and 1-chloro-3-isothiocyanatobenzene (0.24 mmol, 40.7 mg, 32  $\mu$ L) stirred for 24 hours.

$^1\text{H NMR}$  (400 MHz,  $\text{CDCl}_3$ )  $\delta$  8.64 (brs, 1H) 7.47-7.40 (m, 4H), 7.32-7.29 (m, 6H), 7.24-7.22 (m, 1H), 7.18-7.16 (m, 1H), 7.13-7.11 (m, 1H), 7.00 (d,  $J = 8.0$  Hz, 1H), 6.12 (brs, 1H), 4.59 (brs, 1H), 2.47-2.42 (m, 1H), 2.27 (dd,  $J = 11.4, 8.4$  Hz, 1H), 2.13 (h,  $J = 6.4$  Hz, 1H), 0.88 (dd,  $J = 9.2, 6.8$  Hz, 6H);  $^{13}\text{C NMR}$  (100 MHz,  $\text{CDCl}_3$ )  $\delta$  179.7, 138.1 (d,  $J = 11.5$  Hz), 137.9 (d,  $J = 12.2$  Hz), 137.4, 135.4, 132.9 (d,  $J = 6.9$  Hz), 132.7 (d,  $J = 7.0$  Hz), 130.8, 128.8, 128.5 (d,  $J = 6.8$  Hz), 126.7, 124.7, 122.6, 58.6 (d,  $J = 13.9$  Hz), 31.8 (d,  $J = 8.4$  Hz), 31.0 (d,  $J = 14.5$  Hz), 18.7, 18.2;  $^{31}\text{P NMR}$  (160 MHz,  $\text{CDCl}_3$ )  $\delta$  -24.2; **HRMS** Calcd. for  $\text{C}_{24}\text{H}_{27}\text{ClN}_2\text{PS}^+$   $[\text{M}+\text{H}]^+$ : 441.1327, found: 441.1332; **M.p.**: 50-52  $^\circ\text{C}$ ;  $[\alpha]_{\text{D}}^{20} = +52.0$  (c 0.10,  $\text{CH}_2\text{Cl}_2$ ).

**(S)-1-(3,5-dimethylphenyl)-3-(1-(diphenylphosphaneyl)-3-methylbutan-2-yl)thiourea (LB19)**

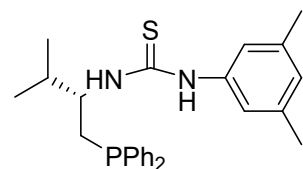

**LB19**

Compound **LB19** (90.0 mg, 90% yield) was obtained as a white solid following the *general procedure II* from **LBa** (0.23 mmol, 62.3 mg) and 1-isothiocyanato-3,5-dimethylbenzene (0.24 mmol, 39.2 mg, 39  $\mu$ L) stirred for 24 hours.

$^1\text{H NMR}$  (400 MHz,  $\text{CDCl}_3$ )  $\delta$  8.22 (brs, 1H) 7.50-7.44 (4H, m, ArH), 7.34-7.29 (m,

6H), 6.88 (s, 1H), 6.73 (s, 2H), 6.15 (d,  $J = 8.0$  Hz, 1H), 4.60 (brs, 1H), 2.44 (dd,  $J = 14.4, 5.6$  Hz, 1H), 2.28 (s, 6H), 2.15 (h,  $J = 6.4$  Hz, 1H), 0.87 (dd,  $J = 16.4, 6.8$  Hz, 6H);  $^{13}\text{C}$  NMR (100 MHz,  $\text{CDCl}_3$ )  $\delta$  179.8, 139.8, 138.2 (d,  $J = 11.9$  Hz), 135.7, 132.8 (d,  $J = 19.3$  Hz), 132.7 (d,  $J = 19.1$  Hz), 128.6, 128.42, 128.36, 122.6, 58.3 (d,  $J = 14.5$  Hz), 31.6 (d,  $J = 8.6$  Hz), 31.2 (d,  $J = 14.6$  Hz), 21.1, 18.8, 17.9;  $^{31}\text{P}$  NMR (160 MHz,  $\text{CDCl}_3$ )  $\delta$  -24.3; **M.p.**: 117-118 °C; **HRMS** Calcd. for  $\text{C}_{26}\text{H}_{32}\text{N}_2\text{PS}^+ [\text{M}+\text{H}]^+$ : 435.2018, found: 435.2013;  $[\alpha]_D^{20} = +72.5$  (c 0.04,  $\text{CH}_2\text{Cl}_2$ ).

**(S)-1-(3,5-bis(trifluoromethyl)phenyl)-3-(1-(diphenylphosphaneyl)-3-methylbutan-2-yl)urea (LB21)**

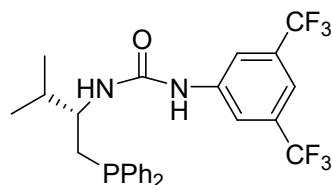

**LB21**

Compound **LB21** (36.0 mg, 40% yield) was obtained as a white solid following the *general procedure II* from **LBa** (0.17 mmol, 46.4 mg) and 1-isothiocyanato-3,5-bis(trifluoromethyl)benzene (0.24 mmol, 61.2 mg, 41  $\mu\text{L}$ ) stirred for 24 hours.

$^1\text{H}$  NMR (400 MHz,  $\text{CDCl}_3$ )  $\delta$  7.66 (s, 2H), 7.41-7.38 (m, 5H), 7.30-7.25 (m, 6H), 5.18 (d,  $J = 8.8$  Hz, 1H), 3.85 (brs, 1H), 2.36 (d,  $J = 12.8$  Hz, 1H), 2.16 (t,  $J = 12.8$  Hz, 1H), 1.95-1.89 (m, 1H), 0.87-0.84 (m, 6H);  $^{13}\text{C}$  NMR (100 MHz,  $\text{CDCl}_3$ )  $\delta$  154.8, 140.4, 138.0 (d,  $J = 10.8$  Hz), 137.7 (d,  $J = 11.7$  Hz), 132.7 (q,  $J = 8.6$  Hz), 132.6 (d,  $J = 8.6$  Hz), 132.0 (d,  $J = 33.0$  Hz), 131.5, 128.9 (d,  $J = 13.5$  Hz), 128.6 (d,  $J = 7.0$  Hz), 123.1 (q,  $J = 271.5$  Hz), 118.5, 115.6, 53.4 (d,  $J = 14.3$  Hz), 32.7 (d,  $J = 7.9$  Hz), 32.2 (d,  $J = 12.9$  Hz), 18.9, 17.5;  $^{31}\text{P}$  NMR (160 MHz,  $\text{CDCl}_3$ )  $\delta$  -22.7;  $^{19}\text{F}$  NMR (376 MHz,  $\text{CDCl}_3$ )  $\delta$  -63.0; **M.p.**: 189-191 °C; **HRMS** Calcd. for  $\text{C}_{26}\text{H}_{26}\text{ON}_2\text{F}_6\text{P}^+ [\text{M}+\text{H}]^+$ : 527.1681, found: 527.1676;  $[\alpha]_D^{20} = -10.0$  (c 0.05,  $\text{CH}_2\text{Cl}_2$ ).

**(S)-1-(3,5-di-tert-butylphenyl)-3-(1-(diphenylphosphaneyl)-3-methylbutan-2-yl)thiourea (LB22)**

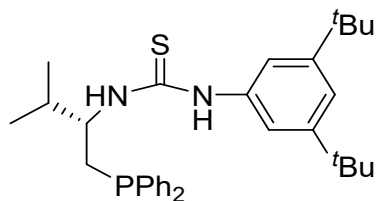

**LB22**

Compound **LB22** (214.8 mg, 83% yield) was obtained as a white solid following the *general procedure II* from **LBa** (0.5 mmol, 136 mg) and 1,3-di-*tert*-butyl-5-isothiocyanatobenzene (0.6 mmol, 148 mg) stirred for 24 hours.

$^1\text{H NMR}$  (400 MHz,  $\text{CDCl}_3$ )  $\delta$  8.60 (s, 1H), 7.53-7.44 (m, 4H), 7.34-7.28 (m, 7H), 7.09 (s, 2H), 6.17 (d,  $J = 8.4$  Hz, 1H), 4.60 (brs, 1H), 2.36 (d,  $J = 6.4$  Hz, 2H), 2.21-2.12 (m, 1H), 1.32 (s, 18 H), 0.87 (dd,  $J = 21.6, 6.4$  Hz, 6H);  $^{13}\text{C NMR}$  (100 MHz,  $\text{CDCl}_3$ )  $\delta$  179.6, 152.7, 138.3 (d,  $J = 12.6$  Hz), 137.8 (d,  $J = 11.5$  Hz), 135.4, 132.7 (d,  $J = 19.2$  Hz), 132.6 (d,  $J = 19.1$  Hz), 128.4 (d,  $J = 5.6$  Hz), 128.3 (d,  $J = 4.2$  Hz), 128.2 (d,  $J = 4.1$  Hz), 120.8, 119.2, 57.7 (d,  $J = 14.6$  Hz), 34.8, 31.4 (d,  $J = 14.5$  Hz), 31.2, 18.9, 17.5;  $^{31}\text{P NMR}$  (160 MHz,  $\text{CDCl}_3$ )  $\delta$  -24.6; **HRMS** Calcd. for  $\text{C}_{32}\text{H}_{44}\text{N}_2\text{PS}^+$   $[\text{M}+\text{H}]^+$ : 519.2968, found: 519.2965; **M.p.**: 60-62 °C;  $[\alpha]_D^{20} = +52.7$  (c 0.11,  $\text{CH}_2\text{Cl}_2$ ).

**(S)-1-([1,1'-biphenyl]-4-yl)-3-(1-(diphenylphosphanyl)-3-methylbutan-2-yl)thiourea (LB23)**

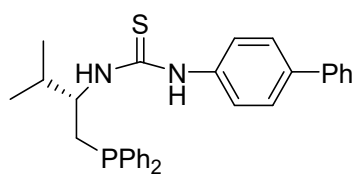

**LB23**

Compound **LB23** (131.2 mg, 82% yield) was obtained as a white solid following the *general procedure II* from **LBa** (0.33 mmol, 71.2 mg) and 4-isothiocyanato-1,1'-biphenyl (0.39 mmol, 83.6 mg) stirred for 24 hours.

$^1\text{H NMR}$  (400 MHz,  $\text{CDCl}_3$ )  $\delta$  8.23 (s, 1H), 7.59 (d,  $J = 8.0$  Hz, 4H), 7.51-7.45 (m, 6H), 7.39 (d,  $J = 7.2$  Hz, 1H), 7.36-7.31 (m, 6H), 7.17 (d,  $J = 8.4$  Hz, 2H), 6.13 (d,  $J = 8.4$  Hz, 1H), 4.65 (brs, 1H), 2.46 (dd,  $J = 14.4, 5.6$  Hz, 1H), 2.32 (dd,  $J = 14.4, 8.0$  Hz, 1H), 2.22-2.14 (m, 1H), 0.90 (dd,  $J = 14.8, 8.0$  Hz, 6H);  $^{13}\text{C NMR}$  (100 MHz,  $\text{CDCl}_3$ )

$\delta$  179.9, 139.7 (d,  $J = 11.7$  Hz), 138.2 (d,  $J = 12.3$  Hz), 135.1, 132.9 (d,  $J = 8.1$  Hz), 132.7 (d,  $J = 8.1$  Hz), 128.9, 128.73, 128.68, 128.51, 128.47, 128.44, 128.40, 127.6, 126.9, 125.1, 58.5 (d,  $J = 14.3$  Hz), 31.7 (d,  $J = 8.6$  Hz), 31.1 (d,  $J = 14.4$  Hz), 18.8, 18.1;  $^{31}\text{P}$  NMR (160 MHz,  $\text{CDCl}_3$ )  $\delta$  -24.2; HRMS Calcd. for  $\text{C}_{30}\text{H}_{32}\text{N}_2\text{SP}^+$   $[\text{M}+\text{H}]^+$ : 483.2018, found: 483.2003; **M.p.**: 60-62 °C;  $[\alpha]^{20}_{\text{D}} = +103.0$  (c 0.10,  $\text{CH}_2\text{Cl}_2$ ).

**(S)-1-([1,1':4',1''-terphenyl]-4-yl)-3-(1-(diphenylphosphaneyl)-3-methylbutan-2-yl)thiourea (LB24)**

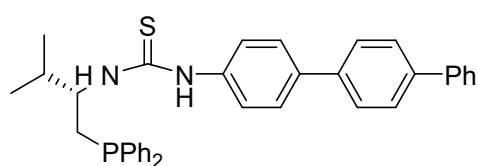

**LB24**

Compound **LB24** (207 mg, 81% yield) was obtained as a white solid following the *general procedure II* from **LBa** (0.46 mmol, 127 mg) and 4-isothiocyanato-1,1':4',1''-terphenyl (0.55 mmol, 158 mg) stirred for 24 hours.

$^1\text{H}$  NMR (400 MHz,  $\text{CDCl}_3$ )  $\delta$  8.22 (s, 1H), 7.73-7.63 (m, 8H), 7.52-7.47 (m, 6H), 7.40 (d,  $J = 7.6$  Hz, 1H), 7.37-7.31 (m, 6H), 7.20 (d,  $J = 8.4$  Hz, 2H), 6.15 (d,  $J = 8.4$  Hz, 1H), 4.67 (s, 1H), 2.48 (dd,  $J = 14.4, 4.0$  Hz, 1H), 2.34 (dd,  $J = 14.4, 8.0$  Hz, 1H), 2.24-2.16 (m, 1H), 0.92 (dd,  $J = 14.0, 6.8$  Hz, 6H);  $^{13}\text{C}$  NMR (100 MHz,  $\text{CDCl}_3$ )  $\delta$  179.9, 140.5, 140.4, 139.1, 138.6, 138.2 (d,  $J = 9.3$  Hz), 135.2, 132.9 (d,  $J = 8.5$  Hz), 132.7 (d,  $J = 8.4$  Hz), 128.8, 128.7 (d,  $J = 4.8$  Hz), 128.5 (d,  $J = 3.7$  Hz), 128.43 (d,  $J = 3.8$  Hz), 128.37, 127.9, 127.6, 127.4, 127.2, 126.9, 126.1, 125.1 (d,  $J = 0.8$  Hz), 58.5 (d,  $J = 14.3$  Hz), 31.8 (d,  $J = 9.2$  Hz), 31.2 (d,  $J = 14.8$  Hz), 18.8, 18.1;  $^{31}\text{P}$  NMR (160 MHz,  $\text{CDCl}_3$ )  $\delta$  -24.1; HRMS Calcd. for  $\text{C}_{36}\text{H}_{36}\text{N}_2\text{PS}^+$   $[\text{M}+\text{H}]^+$ : 559.2331, found: 559.2317; **M.p.**: 136-138 °C;  $[\alpha]^{20}_{\text{D}} = +118.0$  (c 0.10,  $\text{CH}_2\text{Cl}_2$ ).

**(S)-1-(3,5-bis(trifluoromethyl)phenyl)-3-(1-(diphenylphosphaneyl)propan-2-yl)thiourea (LB26)**



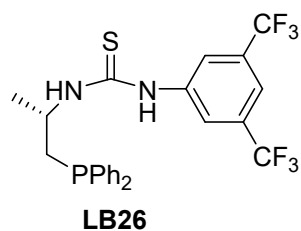

Compound **LB26** (130 mg, 51% yield) was obtained as a white solid following the *general procedure II* from **LBb** (0.5 mmol, 122 mg) and 1-isothiocyanato-3,5-bis(trifluoromethyl)benzene (0.6 mmol, 162 mg, 110  $\mu$ L) stirred for 24 hours.

$^1\text{H NMR}$  (400 MHz,  $\text{CDCl}_3$ )  $\delta$  7.69 (d,  $J = 7.2$  Hz, 3H), 7.48-7.39 (m, 4H), 7.34-7.30 (m, 6H), 6.18 (brs, 1H), 4.65 (brs, 1H), 2.53 (dd,  $J = 14.0, 6.0$  Hz, 1H), 2.41 (dd,  $J = 14.0, 6.4$  Hz, 1H), 1.38 (d,  $J = 6.4$  Hz, 3H);  $^{13}\text{C NMR}$  (125 MHz,  $\text{CDCl}_3$ )  $\delta$  178.9, 139.0, 137.2 (d,  $J = 9.8$  Hz), 137.1 (d,  $J = 9.6$  Hz), 132.7 (d,  $J = 4.6$  Hz), 132.5 (d,  $J = 4.6$  Hz), 128.9, 128.57 (d,  $J = 7.0$  Hz), 128.55 (d,  $J = 7.0$  Hz), 123.4, 122.7 (q,  $J = 217.3$  Hz), 118.8, 49.3 (d,  $J = 14.8$  Hz), 35.8 (d,  $J = 12.4$  Hz), 21.6 (d,  $J = 8.6$  Hz);  $^{31}\text{P NMR}$  (160 MHz,  $\text{CDCl}_3$ )  $\delta$  -24.9;  $^{19}\text{F NMR}$  (376 MHz,  $\text{CDCl}_3$ )  $\delta$  -62.8; **HRMS** Calcd. for  $\text{C}_{24}\text{H}_{22}\text{F}_6\text{N}_2\text{PS}^+[\text{M}+\text{H}]^+$ : 515.1140, found: 515.1129; **M.p.**: 106-108  $^\circ\text{C}$ ;  $[\alpha]_{\text{D}}^{20} = +24.8$  (c 0.20,  $\text{CH}_2\text{Cl}_2$ ).

**(S)-1-(3,5-bis(trifluoromethyl)phenyl)-3-(1-(diphenylphosphaneyl)butan-2-yl)thiourea (LB27)**

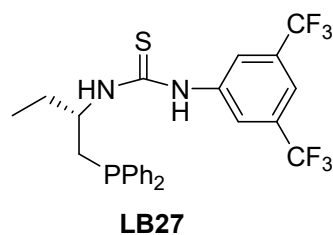

Compound **LB27** (69.5 mg, 40% yield) was obtained as a white solid following the *general procedure II* from **LBc** (0.33 mmol, 85 mg) and 1-isothiocyanato-3,5-bis(trifluoromethyl)benzene (0.4 mmol, 108 mg, 73  $\mu$ L) stirred for 24 hours.

$^1\text{H NMR}$  (400 MHz,  $\text{CDCl}_3$ )  $\delta$  8.26 (brs, 1H), 7.67 (d,  $J = 10.4$  Hz, 3H), 7.46-7.39 (m, 4H), 7.31-7.30 (m, 6H), 6.25 (brs, 1H), 4.62 (brs, 1H), 2.60 (d,  $J = 12.4$  Hz, 1H), 2.37 (dd,  $J = 14.4, 7.2$  Hz, 1H), 1.82-1.66 (m, 2H), 0.94 (t,  $J = 7.2$  Hz, 3H);  $^{13}\text{C NMR}$  (125 MHz,  $\text{CDCl}_3$ )  $\delta$  179.6, 138.8, 137.6, 137.3, 132.73 (d,  $J = 19.0$  Hz), 132.69 (d,  $J = 19.0$

Hz), 129.0, 128.6 (d,  $J = 6.9$  Hz), 123.6, 122.8 (q,  $J = 271.8$  Hz), 119.11 (d,  $J = 3.5$  Hz), 119.05 (d,  $J = 3.8$  Hz), 55.0 (d,  $J = 13.6$  Hz), 33.2, 28.4, 10.2;  $^{31}\text{P}$  NMR (160 MHz,  $\text{CDCl}_3$ )  $\delta$  -25.2 (s);  $^{19}\text{F}$  NMR (376 MHz,  $\text{CDCl}_3$ )  $\delta$  -62.9 (s); HRMS Calcd. for  $\text{C}_{25}\text{H}_{24}\text{F}_6\text{N}_2\text{PS}^+$   $[\text{M}+\text{H}]^+$ : 529.1307, found: 529.1302; **M.p.**: 133-135 °C;  $[\alpha]^{20}_{\text{D}} = +7.5$  (c 0.04,  $\text{CH}_2\text{Cl}_2$ ).

**(R)-1-(3,5-bis(trifluoromethyl)phenyl)-3-(3-(diphenylphosphaneyl)-1,1-diphenylpropan-2-yl)thiourea (LB28)**

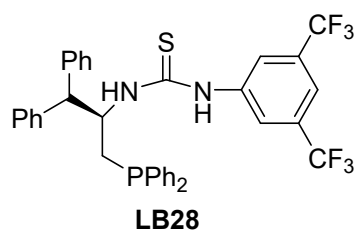

Compound **LB28** (183.4 mg, 64% yield) was obtained as a white solid following the *general procedure II* from **LBe** (0.43 mmol, 171 mg) and 1-isothiocyanato-3,5-bis(trifluoromethyl)benzene (0.52 mmol, 141 mg, 95  $\mu\text{L}$ ) stirred for 24 hours.

$^1\text{H}$  NMR (400 MHz,  $\text{CDCl}_3$ )  $\delta$  8.24 (brs, 1H), 7.65 (s, 1H), 7.49-7.45 (m, 2H), 7.37-7.29 (m, 9H), 7.25-7.15 (m, 9H), 7.05 (s, 2H), 5.80 (brs, 2H), 4.60 (d,  $J = 7.6$  Hz, 1H), 2.99 (d,  $J = 10.0$  Hz, 1H), 2.12 (d,  $J = 14.8$  Hz, 1H);  $^{13}\text{C}$  NMR (125 MHz,  $\text{CDCl}_3$ )  $\delta$  179.2, 141.0 (d,  $J = 18.6$  Hz), 138.1 (d,  $J = 9.6$  Hz), 137.7, 136.9 (d,  $J = 11.3$  Hz), 133.1 (d,  $J = 19.9$  Hz), 132.8 (d,  $J = 32.9$  Hz), 132.2 (d,  $J = 18.3$  Hz), 129.1, 128.9 (d,  $J = 9.8$  Hz), 128.6 (d,  $J = 7.3$  Hz), 128.5, 128.4 (d,  $J = 6.8$  Hz), 128.3, 127.9, 127.1, 127.0, 123.9 (d,  $J = 2.9$  Hz), 122.6 (q,  $J = 271.9$  Hz), 119.4 (d,  $J = 6.6$  Hz), 56.1 (d,  $J = 73.9$  Hz), 31.6, 22.6;  $^{31}\text{P}$  NMR (160 MHz,  $\text{CDCl}_3$ )  $\delta$  -27.7;  $^{19}\text{F}$  NMR (376 MHz,  $\text{CDCl}_3$ )  $\delta$  -62.6; **M.p.**: 79-81 °C; HRMS Calcd. for  $\text{C}_{36}\text{H}_{30}\text{F}_6\text{N}_2\text{SP}^+$   $[\text{M}+\text{H}]^+$ : 667.1766, found: 667.1749;  $[\alpha]^{20}_{\text{D}} = -58.0$  (c 0.05,  $\text{CH}_2\text{Cl}_2$ ).

**(S)-1-(3,5-bis(trifluoromethyl)phenyl)-3-(1-(diphenylphosphaneyl)-4-methylpentan-2-yl)thiourea (LB29)**

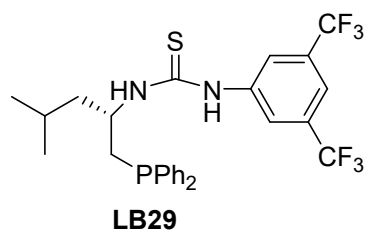

Compound **LB29** (173.2 mg, 62% yield) was obtained as a white solid following the *general procedure II* from **LBd** (0.5 mmol, 143 mg) and 1-isothiocyanato-3,5-bis(trifluoromethyl)benzene (0.6 mmol, 163 mg, 110  $\mu$ L) stirred for 24 hours.

$^1\text{H NMR}$  (400 MHz,  $\text{CDCl}_3$ )  $\delta$  8.95 (brs, 1H), 7.69 (d,  $J = 10.4$  Hz, 3H), 7.50-7.42 (m, 4H), 7.34-7.31 (m, 6H), 6.41 (brs, 1H), 4.85 (brs, 1H), 2.68 (s, 1H), 2.40 (dd,  $J = 14.0$ , 6.0 Hz, 1H), 1.62 (brs, 3H), 0.91-0.87 (m, 6H);  $^{13}\text{C NMR}$  (100 MHz,  $\text{CDCl}_3$ )  $\delta$  179.3, 138.8, 137.6 (d,  $J = 10.2$  Hz), 132.9, 132.7, 132.5, 129.0, 128.9, 128.6, 128.5, 123.4, 122.8 (q,  $J = 271.6$  Hz), 118.9, 51.9 (d,  $J = 12.9$  Hz), 44.6 (d,  $J = 8.9$  Hz), 34.1, 25.1, 22.4;  $^{31}\text{P NMR}$  (160 MHz,  $\text{CDCl}_3$ )  $\delta$  -25.4;  $^{19}\text{F NMR}$  (376 MHz,  $\text{CDCl}_3$ )  $\delta$  -62.9; **M.p.**: 145-146  $^\circ\text{C}$ ; **HRMS** Calcd. for  $\text{C}_{27}\text{H}_{28}\text{F}_6\text{N}_2\text{SP}^+$   $[\text{M}+\text{H}]^+$ : 557.1610, found: 557.1616;  $[\alpha]_D^{20} = -2.50$  (c 0.20,  $\text{CH}_2\text{Cl}_2$ ).

**(S)-1-([1,1'-biphenyl]-4-yl)-3-(1-(diphenylphosphanyl)-4-methylpentan-2-yl)thiourea (LB30)**

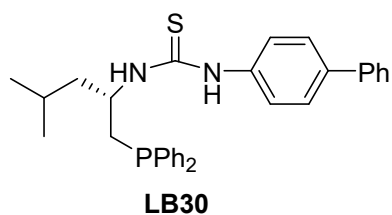

Compound **LB30** (109 mg, 88% yield) was obtained as a white solid following the *general procedure II* from **LBd** (0.25 mmol, 71 mg) and 4-isothiocyanato-1,1'-biphenyl (0.3 mmol, 63.3 mg) stirred for 24 hours.

$^1\text{H NMR}$  (400 MHz,  $\text{CDCl}_3$ )  $\delta$  8.24 (brs, 1H), 7.59 (d,  $J = 7.6$  Hz, 4H), 7.53-7.44 (m, 6H), 7.40-7.29 (m, 7H), 7.14 (d,  $J = 8.4$  Hz, 2H), 6.10 (brs, 1H), 4.87 (brs, 1H), 2.59 (dd,  $J = 14.4$ , 6.4 Hz, 1H), 2.42 (dd,  $J = 14.0$ , 6.0 Hz, 1H), 1.62-1.53 (m, 3H), 0.88 (d,  $J = 4.4$  Hz, 6H);  $^{13}\text{C NMR}$  (100 MHz,  $\text{CDCl}_3$ )  $\delta$  179.3, 139.7 (d,  $J = 16.6$  Hz), 138.3 (d,  $J = 11.1$  Hz), 138.0 (d,  $J = 11.5$  Hz), 135.1, 133.0 (d,  $J = 19.3$  Hz), 132.6 (d,  $J =$

19.0 Hz), 128.8, 128.7, 128.6, 128.49, 128.45, 128.41, 128.38, 127.6, 126.9, 125.1, 52.1 (d,  $J = 14.3$  Hz), 44.5 (d,  $J = 9.4$  Hz), 34.4 (d,  $J = 14.5$  Hz), 25.1, 22.7, 22.4;  $^{31}\text{P}$  NMR (160 MHz,  $\text{CDCl}_3$ )  $\delta$  -24.9; **M.p.**: 55-57 °C; **HRMS** Calcd. for  $\text{C}_{31}\text{H}_{34}\text{N}_2\text{SP}^+$   $[\text{M}+\text{H}]^+$ : 497.2175, found: 497.2163;  $[\alpha]^{20}_{\text{D}} = +75.0$  (c 0.20,  $\text{CH}_2\text{Cl}_2$ ).

**(S)-1-(3',5'-dimethoxy-[1,1'-biphenyl]-4-yl)-3-(1-(diphenylphosphaneyl)-4-methylpentan-2-yl)thiourea (LB31)**

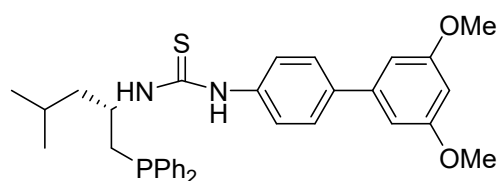

**LB31**

Compound **LB31** (189.8 mg, 68% yield) was obtained as a white solid following the *general procedure II* from **LBd** (0.5 mmol, 143 mg) and 4'-isothiocyanato-3,5-dimethoxy-1,1'-biphenyl (0.6 mmol, 163 mg) stirred for 24 hours.

$^1\text{H}$  NMR (400 MHz,  $\text{CDCl}_3$ )  $\delta$  8.60 (s, 1H), 7.58-7.43 (m, 6H), 7.38-7.27 (m, 6H), 7.15 (d,  $J = 8.4$  Hz, 2H), 6.72 (d,  $J = 2.0$  Hz, 2H), 6.50 (t,  $J = 2.0$  Hz, 1H), 6.14 (brs, 1H), 6.88 (brs, 1H), 3.85 (s, 6H), 2.59 (dd,  $J = 14.4, 6.4$  Hz, 1H), 2.42 (dd,  $J = 14.0, 4.8$  Hz, 1H), 1.63-1.54 (m, 3H), 0.88 (d,  $J = 6.0$  Hz, 6H);  $^{13}\text{C}$  NMR (100 MHz,  $\text{CDCl}_3$ )  $\delta$  179.4, 161.1, 142.0, 139.6, 138.3 (d,  $J = 11.7$  Hz), 138.1 (d,  $J = 11.2$  Hz), 135.3, 133.0 (d,  $J = 19.5$  Hz), 132.6 (d,  $J = 19.1$  Hz), 128.8, 128.6, 128.5 (d,  $J = 3.6$  Hz), 128.4 (d,  $J = 3.3$  Hz), 125.0, 105.3, 99.5, 55.4, 52.2 (d,  $J = 14.1$  Hz), 44.5 (d,  $J = 9.5$  Hz), 34.4 (d,  $J = 14.6$  Hz), 25.1, 22.7, 22.5;  $^{31}\text{P}$  NMR (160 MHz,  $\text{CDCl}_3$ )  $\delta$  -24.9; **M.p.**: 57-59 °C; **HRMS** Calcd. for  $\text{C}_{33}\text{H}_{38}\text{N}_2\text{O}_2\text{SP}^+$   $[\text{M}+\text{H}]^+$ : 557.2386, found: 557.2381;  $[\alpha]^{20}_{\text{D}} = +82.0$  (c 0.05,  $\text{CH}_2\text{Cl}_2$ ).

**(S)-1-(3',5'-bis(trifluoromethyl)-[1,1'-biphenyl]-4-yl)-3-(1-(diphenylphosphaneyl)-4-methylpentan-2-yl)thiourea (LB32)**

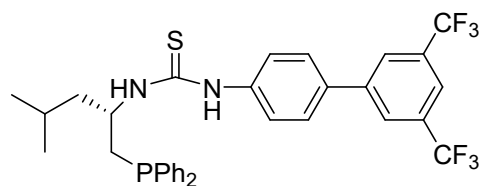

**LB32**

Compound **LB32** (195.4 mg, 62% yield) was obtained as a white solid following the *general procedure II* from **LBd** (0.5 mmol, 143 mg) and 4'-isothiocyanato-3,5-bis(trifluoromethyl)-1,1'-biphenyl (0.6 mmol, 208 mg) stirred for 24 hours.

$^1\text{H NMR}$  (400 MHz,  $\text{CDCl}_3$ )  $\delta$  7.99 (s, 2H), 7.88 (s, 1H), 7.60 (d,  $J = 8.4$  Hz, 2H), 7.51-7.43 (m, 4H), 7.35-7.29 (m, 6H), 7.21 (d,  $J = 8.4$  Hz, 2H), 6.07 (brs, 1H), 4.84 (brs, 1H), 2.61 (dd,  $J = 14.0, 6.0$  Hz, 1H), 2.38 (dd,  $J = 14.4, 5.6$  Hz, 1H), 1.58-1.53 (m, 3H), 0.87 (dd,  $J = 6.0, 3.6$  Hz, 6H);  $^{13}\text{C NMR}$  (125 MHz,  $\text{CDCl}_3$ )  $\delta$  179.4, 142.0, 138.2 (d,  $J = 9.8$  Hz), 138.0 (d,  $J = 11.0$  Hz), 136.8, 136.3, 133.0 (d,  $J = 19.4$  Hz), 132.6 (d,  $J = 18.9$  Hz), 132.3 (d,  $J = 33.1$  Hz), 131.9, 128.9 (d,  $J = 10.3$  Hz), 128.7 (d,  $J = 16.1$  Hz), 128.54, 128.51 (d,  $J = 5.4$  Hz), 127.0 (d,  $J = 2.9$  Hz), 125.1, 123.2 (q,  $J = 271.4$  Hz), 121.2, 52.4 (d,  $J = 14.5$  Hz), 44.6 (d,  $J = 9.4$  Hz), 34.4 (d,  $J = 14.0$  Hz), 25.2, 22.6, 22.5;  $^{31}\text{P NMR}$  (160 MHz,  $\text{CDCl}_3$ )  $\delta$  -25.2;  $^{19}\text{F NMR}$  (376 MHz,  $\text{CDCl}_3$ )  $\delta$  -62.7; **M.p.**: 138-139 °C; **HRMS** Calcd. for  $\text{C}_{33}\text{H}_{32}\text{F}_6\text{N}_2\text{SP}^+$   $[\text{M}+\text{H}]^+$ : 633.1928, found: 633.1932;  $[\alpha]_D^{20} = +88.0$  (c 0.10,  $\text{CH}_2\text{Cl}_2$ ).

**(R)-1-(3',5'-bis(trifluoromethyl)-[1,1'-biphenyl]-4-yl)-3-(1-(diphenylphosphanyl)-4-methylpentan-2-yl)thiourea (LB33)**

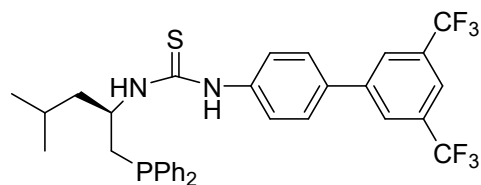

**LB33**

Compound **LB33** (229 mg, 73% yield) was obtained as a white solid following the *general procedure II* from **LBf** (0.5 mmol, 143 mg) and 4'-isothiocyanato-3,5-bis(trifluoromethyl)-1,1'-biphenyl (0.6 mmol, 208 mg) stirred for 24 hours.

$^1\text{H NMR}$  (400 MHz,  $\text{CDCl}_3$ )  $\delta$  8.30 (brs, 1H), 7.99 (s, 2H), 7.88 (s, 1H), 7.59 (d,  $J = 8.0$  Hz, 2H), 7.52-7.43 (m, 4H), 7.34-7.31 (m, 6H), 7.24 (d,  $J = 8.0$  Hz, 2H), 6.15 (brs,

1H), 4.86 (brs, 1H), 2.62 (dd,  $J = 14.0, 5.6$  Hz, 1H), 2.39 (dd,  $J = 14.4, 6.0$  Hz, 1H), 1.56 (d,  $J = 6.8$  Hz, 2H), 1.27 (s, 1H), 0.89-0.86 (m, 6H);  $^{13}\text{C}$  NMR (100 MHz,  $\text{CDCl}_3$ )  $\delta$  179.3, 142.0 138.2 (d,  $J = 10.8$  Hz), 138.0 (d,  $J = 10.9$  Hz), 137.0, 136.1, 133.0 (d,  $J = 19.3$  Hz), 132.6 (d,  $J = 18.9$  Hz), 132.3 (q,  $J = 33.2$  Hz), 131.8, 128.9, 128.7, 128.6 (d,  $J = 4.6$  Hz), 128.5 (d,  $J = 4.5$  Hz), 127.0, 125.0, 123.2 (q,  $J = 271.4$  Hz), 121.1, 52.2 (d,  $J = 14.0$  Hz), 44.6 (d,  $J = 9.1$  Hz), 34.4 (d,  $J = 13.7$  Hz), 25.2, 22.6, 22.5;  $^{31}\text{P}$  NMR (160 MHz,  $\text{CDCl}_3$ )  $\delta$  -25.2;  $^{19}\text{F}$  NMR (376 MHz,  $\text{CDCl}_3$ )  $\delta$  -62.7; **M.p.:** 136-138 °C; **HRMS** Calcd. for  $\text{C}_{33}\text{H}_{32}\text{F}_6\text{N}_2\text{SP}^+$   $[\text{M}+\text{H}]^+$ : 633.1928, found: 633.1926;  $[\alpha]_{\text{D}}^{20} = -47.0$  (c 0.10,  $\text{CH}_2\text{Cl}_2$ ).

**General procedure (III) for the synthesis of C2-quaternary indolin-3-ones (3aa-3xe).**

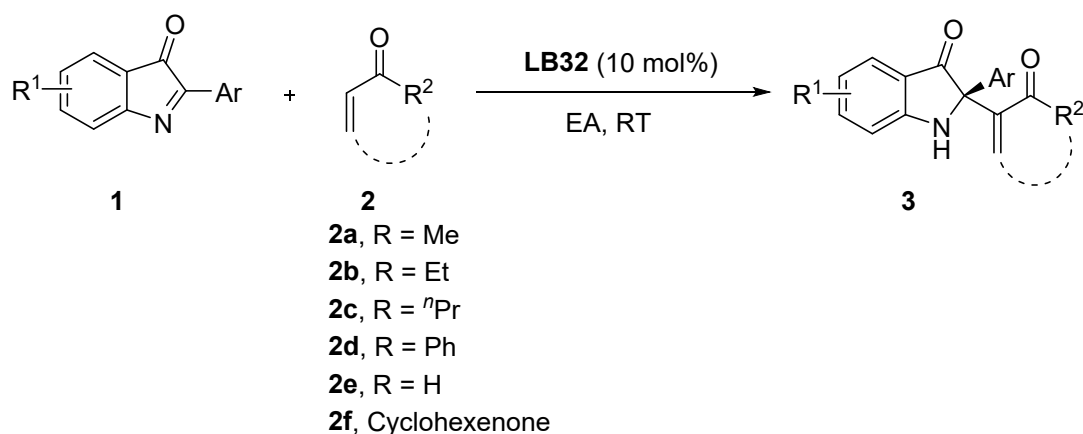

**Procedure (III):** To a solution of compound **1** (0.1 mmol, 1.0 equiv.) and chiral phosphine **LB32** (0.01 mmol, 0.1 equiv.) in ethyl acetate (2.0 mL) was added compound **2** (0.15 mmol, 1.5 equiv.) under nitrogen atmosphere at room temperature. TLC monitor until the compound **1** consumed after six hours. The reaction mixture was then concentrated on a rotary evaporator under reduce pressure and the residue was subjected to purification by column chromatography (silica gel, PE/EtOAc: 15/1 to 10/1,  $R_f = 0.2-0.3$ ) to afford the corresponding product **3**.

**(S)-2-(3-oxobut-1-en-2-yl)-2-phenylindolin-3-one (3aa)**

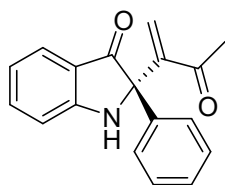

**3aa**

Compound **3aa** (26.3 mg, 95% yield) was obtained as a yellow solid following the *general procedure III* from **1a** (0.1 mmol, 20.7 mg) and **2a** (0.15 mmol, 10.5 mg, 12.5  $\mu$ L) stirred for 6 hours.

$^1\text{H NMR}$  (400 MHz,  $\text{CDCl}_3$ )  $\delta$  7.57 (d,  $J = 7.6$  Hz, 1H), 7.50-7.42 (m, 3H), 7.32-7.29 (m, 2H), 7.25-7.21 (m, 1H), 6.92-6.90 (m, 1H), 6.79 (t,  $J = 7.6$  Hz, 1H), 6.41-6.40 (m, 2H), 6.26 (brs, 1H), 2.36 (s, 3H);  $^{13}\text{C NMR}$  (100 MHz,  $\text{CDCl}_3$ )  $\delta$  200.1, 198.5, 159.6, 145.4, 137.9, 137.8, 128.58, 128.55, 127.6, 125.4, 125.2, 118.7, 118.4, 111.6, 72.6, 27.1; **HRMS** Calcd. for  $\text{C}_{18}\text{H}_{16}\text{NO}_2^+$   $[\text{M}+\text{H}]^+$ : 278.1187, found: 278.1186; **M.p.**: 158-160  $^\circ\text{C}$ .

$[\alpha]_{\text{D}}^{20} = -677.0$  (c 0.10,  $\text{CH}_2\text{Cl}_2$ ) for 90% ee; Enantiomeric excess was determined by HPLC with a Chiralcel OD-H column, Hexane/ $i$ PrOH = 90/10, 0.5 mL/min, 230 nm,  $t_{\text{minor}} = 29.862$  min,  $t_{\text{major}} = 26.359$  min.

### Racemic Sample of 3aa

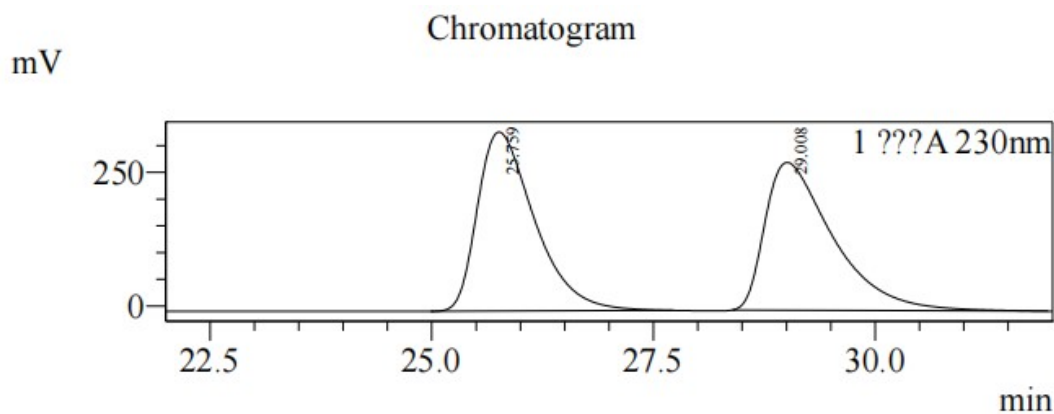

Peak Table

???A 230nm

| Peak# | Ret. Time | Area     | Height | Area%   |
|-------|-----------|----------|--------|---------|
| 1     | 25.759    | 14981922 | 334691 | 50.354  |
| 2     | 29.008    | 14771524 | 276099 | 49.646  |
| Total |           | 29753446 | 610789 | 100.000 |

### Enantiomeric Sample of 3aa

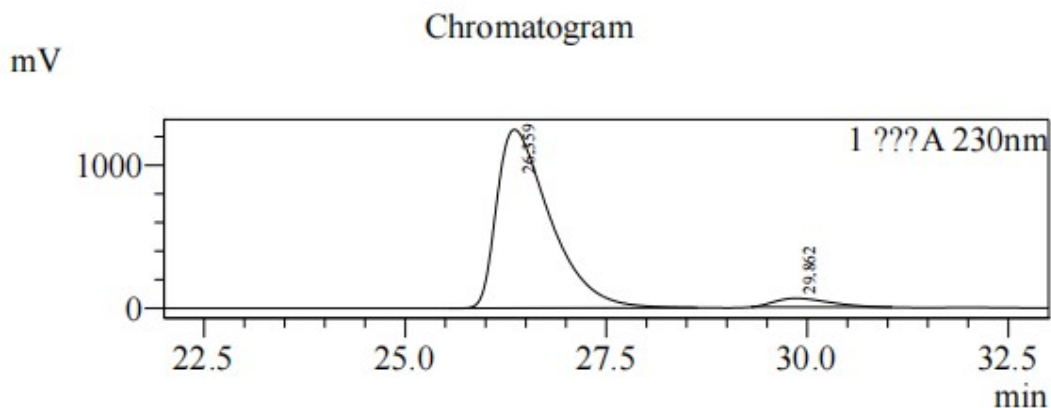

Peak Table

???A 230nm

| Peak# | Ret. Time | Area     | Height  | Area%   |
|-------|-----------|----------|---------|---------|
| 1     | 26.359    | 57554823 | 1250244 | 95.153  |
| 2     | 29.862    | 2931544  | 61266   | 4.847   |
| Total |           | 60486367 | 1311510 | 100.000 |

**(S)-2-(3-oxopent-1-en-2-yl)-2-phenylindolin-3-one (3ab)**

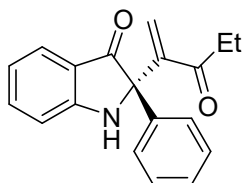

**3ab**

Compound **3ab** (27.4 mg, 94% yield) was obtained as a yellow solid following the *general procedure III* from **1a** (0.1 mmol, 20.7 mg) and **2b** (0.15 mmol, 12.6 mg, 14.8  $\mu$ L) stirred for 6 hours.

$^1\text{H NMR}$  (400 MHz,  $\text{CDCl}_3$ )  $\delta$  7.56 (d,  $J = 7.6$  Hz, 1H), 7.50-7.42 (m, 3H), 7.31-7.27 (m, 2H), 7.25-7.21 (m, 1H), 6.91 (d,  $J = 8.4$  Hz, 1H), 6.78 (t,  $J = 7.6$  Hz, 1H), 6.38 (s, 1H), 6.34 (s, 1H), 6.27 (brs, 1H), 2.85-2.64 (m, 2H), 1.02 (t,  $J = 7.2$  Hz, 3H);  $^{13}\text{C NMR}$  (100 MHz,  $\text{CDCl}_3$ )  $\delta$  202.8, 198.5, 159.6, 145.1, 138.0, 137.8, 128.6, 127.6, 127.2, 125.4, 124.8, 118.7, 118.5, 111.7, 72.9, 32.1, 8.0; **HRMS** Calcd. for  $\text{C}_{19}\text{H}_{18}\text{NO}_2^+$   $[\text{M}+\text{H}]^+$ : 292.1332, found: 292.1331; **M.p.**: 131-133  $^\circ\text{C}$ .

$[\alpha]_{\text{D}}^{20} = -328.0$  (c 0.10,  $\text{CH}_2\text{Cl}_2$ ) for 90% ee; Enantiomeric excess was determined by HPLC with a Chiralcel OD-H column, Hexane/*i*PrOH = 90/10, 0.5 mL/min, 230 nm,  $t_{\text{minor}} = 26.566$  min,  $t_{\text{major}} = 31.697$  min.



### Racemic Sample of 3ab

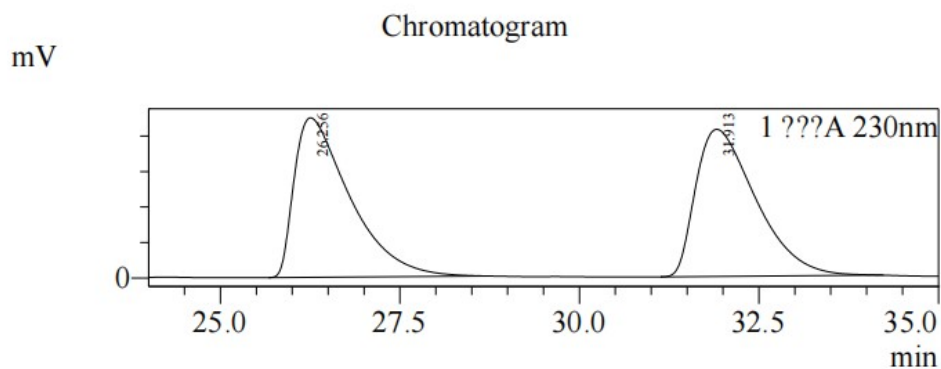

Peak Table

???A 230nm

| Peak# | Ret. Time | Area     | Height  | Area%   |
|-------|-----------|----------|---------|---------|
| 1     | 26.256    | 48541672 | 898281  | 50.117  |
| 2     | 31.913    | 48315644 | 828445  | 49.883  |
| Total |           | 96857316 | 1726726 | 100.000 |

### Enantiomeric Sample of 3ab

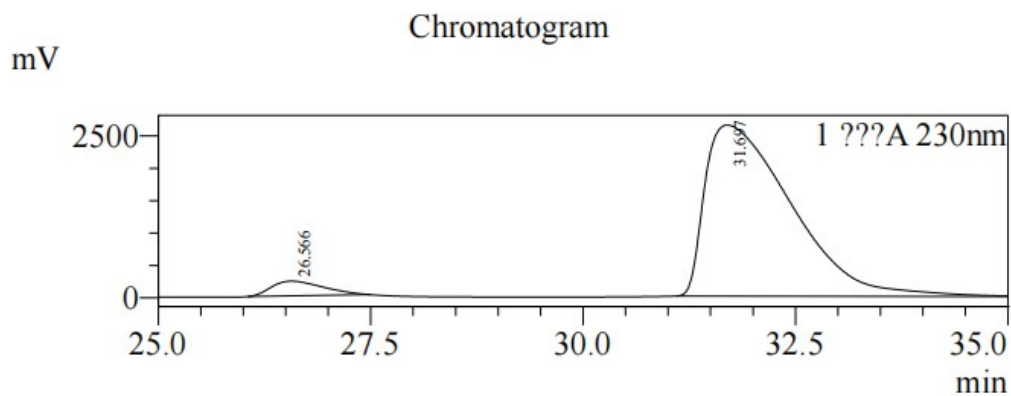

Peak Table

???A 230nm

| Peak# | Ret. Time | Area      | Height  | Area%   |
|-------|-----------|-----------|---------|---------|
| 1     | 26.566    | 9595773   | 226576  | 4.884   |
| 2     | 31.697    | 186864092 | 2641594 | 95.116  |
| Total |           | 196459865 | 2868170 | 100.000 |

### **(S)-2-(3-oxohex-1-en-2-yl)-2-phenylindolin-3-one (3ac)**

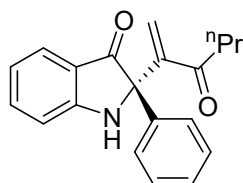

**3ac**

Compound **3ac** (27.4 mg, 90% yield) was obtained as a yellow solid following the

general procedure III from **1a** (0.1 mmol, 20.7 mg) and **2c** (0.15 mmol, 14.7 mg, 17.5  $\mu$ L) stirred for 6 hours.

$^1\text{H NMR}$  (400 MHz,  $\text{CDCl}_3$ )  $\delta$  7.57 (d,  $J = 8.0$  Hz, 1H), 7.50-7.42 (m, 3H), 7.31-7.27 (m, 2H), 7.24-7.21 (m, 1H), 6.91 (d,  $J = 8.4$  Hz, 1H), 6.78 (t,  $J = 7.6$  Hz, 1H), 6.37 (s, 1H), 6.34 (s, 1H), 6.29 (brs, 1H), 2.74-2.61 (m, 2H), 1.56 (h,  $J = 7.6$  Hz, 2H), 0.85 (t,  $J = 7.6$  Hz, 3H);  $^{13}\text{C NMR}$  (100 MHz,  $\text{CDCl}_3$ )  $\delta$  202.5, 198.5, 159.6, 145.4, 138.0, 137.8, 128.5, 127.6, 127.2, 125.4, 125.2, 118.7, 118.5, 111.7, 72.9, 40.8, 17.6, 13.6; **HRMS** Calcd. for  $\text{C}_{20}\text{H}_{20}\text{NO}_2^+$   $[\text{M}+\text{H}]^+$ : 306.1489, found: 306.1487; **M.p.**: 42-44  $^\circ\text{C}$ .

$[\alpha]_D^{20} = -828.0$  (c 0.05,  $\text{CH}_2\text{Cl}_2$ ) for 91% ee; Enantiomeric excess was determined by HPLC with a Chiralcel IF-H column, Hexane/ $i$ PrOH = 95/5, 0.2 mL/min, 230 nm,  $t_{\text{minor}} = 99.826$  min,  $t_{\text{major}} = 93.696$  min.

### Racemic Sample of 3ac

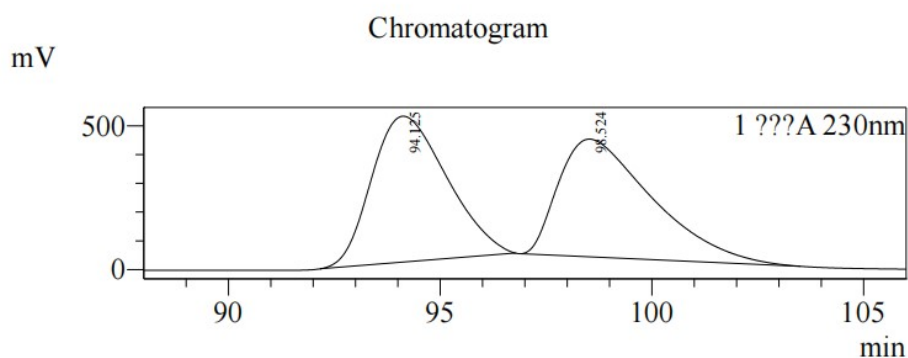

Peak Table

???A 230nm

| Peak# | Ret. Time | Area      | Height | Area%   |
|-------|-----------|-----------|--------|---------|
| 1     | 94.125    | 62565488  | 507630 | 49.923  |
| 2     | 98.524    | 62759228  | 409320 | 50.077  |
| Total |           | 125324716 | 916950 | 100.000 |

### Enantiomeric Sample of 3ac

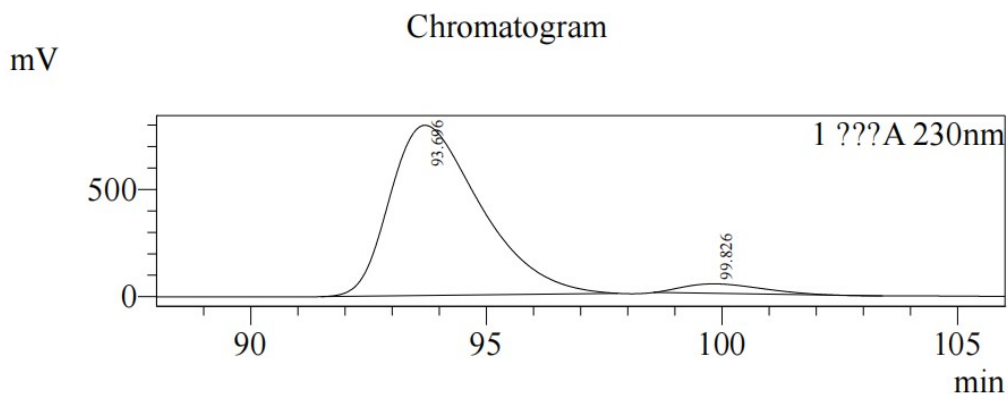

Peak Table

???A 230nm

| Peak# | Ret. Time | Area      | Height | Area%   |
|-------|-----------|-----------|--------|---------|
| 1     | 93.696    | 106057757 | 793893 | 95.322  |
| 2     | 99.826    | 5204608   | 44449  | 4.678   |
| Total |           | 111262366 | 838342 | 100.000 |

**(S)-2-(3-oxo-3-phenylprop-1-en-2-yl)-2-phenylindolin-3-one (3ad)**

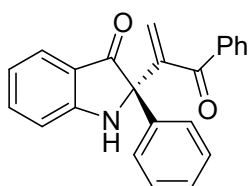

**3ad**

Compound **3ad** (17.1 mg, 50% yield) was obtained as a yellow solid following the *general procedure III* from **1a** (0.1 mmol, 20.7 mg) and **2d** (0.15 mmol, 19.8 mg, 19.4  $\mu$ L) stirred for 8 hours.

$^1\text{H NMR}$  (400 MHz,  $\text{CDCl}_3$ )  $\delta$  7.94-7.92 (m, 2H), 7.68 (d,  $J = 7.6$  Hz, 1H), 7.61-7.55 (m, 2H), 7.52-7.46 (m, 4H), 7.41-7.34 (m, 4H), 7.29 (d,  $J = 4.0$  Hz, 1H), 7.04 (d,  $J = 8.4$  Hz, 1H), 6.96-6.92 (m, 1H), 5.25 (s, 1H);  $^{13}\text{C NMR}$  (100 MHz,  $\text{CDCl}_3$ )  $\delta$  198.2, 190.5, 160.1, 145.5, 138.0, 137.9, 137.3, 133.1, 129.1, 128.7, 128.6, 128.5, 126.2, 125.73, 125.66, 120.1, 119.1, 112.6, 73.1; **M.p.**: 125-127  $^\circ\text{C}$ ; **HRMS** Calcd. for  $\text{C}_{23}\text{H}_{18}\text{NO}_2^+ [\text{M}+\text{H}]^+$ : 340.1343, found: 340.1336.

$[\alpha]_{\text{D}}^{20} = -4.2$  (c 0.13,  $\text{CH}_2\text{Cl}_2$ ) for 3% ee; Enantiomeric excess was determined by HPLC with a Chiralcel IB-H column, Hexane/ $i$ PrOH = 90/10, 0.5 mL/min, 230 nm,  $t_{\text{minor}} = 23.500$  min,  $t_{\text{major}} = 42.696$  min.

### Racemic Sample of 3ad

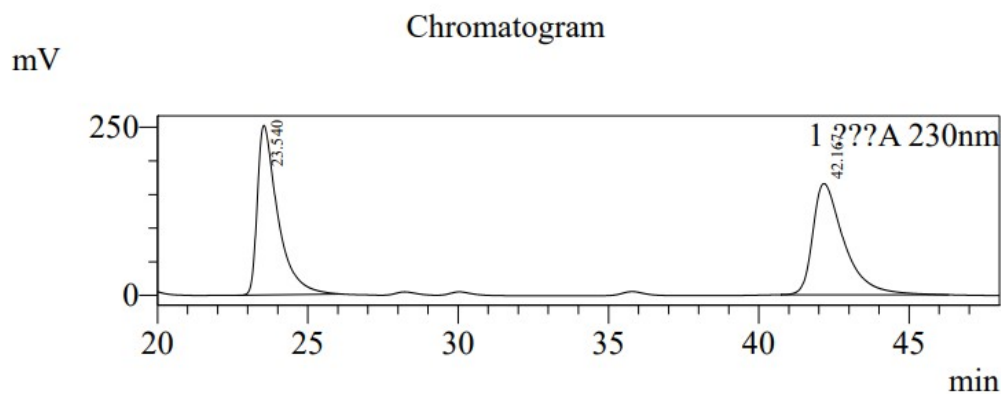

Peak Table

???A 230nm

| Peak# | Ret. Time | Area     | Height | Area%   |
|-------|-----------|----------|--------|---------|
| 1     | 23.540    | 12010462 | 252321 | 50.021  |
| 2     | 42.167    | 12000235 | 165221 | 49.979  |
| Total |           | 24010697 | 417542 | 100.000 |

### Enantiomeric Sample of 3ad

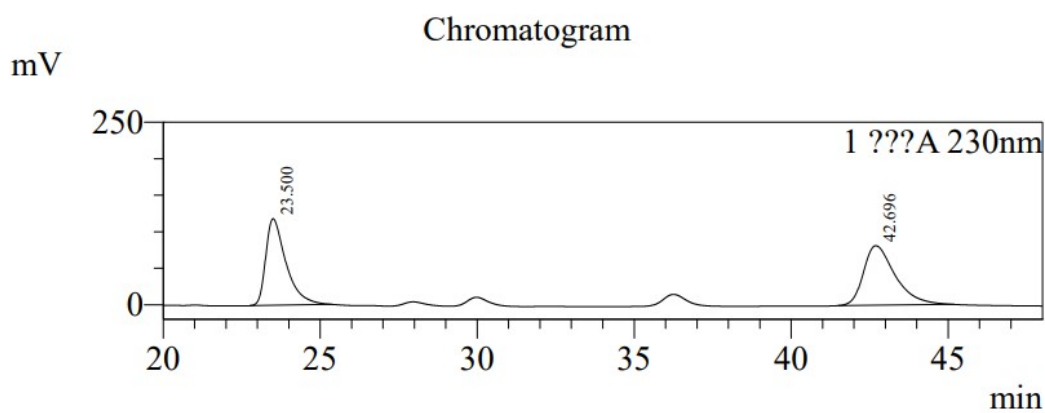

Peak Table

???A 230nm

| Peak# | Ret. Time | Area     | Height | Area%   |
|-------|-----------|----------|--------|---------|
| 1     | 23.500    | 5335510  | 118611 | 48.289  |
| 2     | 42.696    | 5713498  | 81574  | 51.711  |
| Total |           | 11049008 | 200185 | 100.000 |

### (S)-2-(3-oxo-2-phenylindolin-2-yl)acrylaldehyde (3ae)

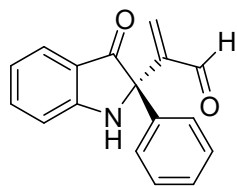

**3ae**

Compound **3ae** (24.7 mg, 94% yield) was obtained as a yellow solid following the *general procedure III* from **1a** (0.1 mmol, 20.7 mg) and **2e** (0.15 mmol, 8.4 mg, 10  $\mu$ L) stirred for 3 hours.

$^1\text{H NMR}$  (400 MHz,  $\text{CDCl}_3$ )  $\delta$  9.54 (s, 1H), 7.58 (d,  $J = 8.8$  Hz, 1H), 7.51-7.43 (m, 3H), 7.33-7.24 (m, 3H), 6.93 (d,  $J = 6.4$  Hz, 2H), 6.81 (t,  $J = 8.0$  Hz, 1H), 6.39 (s, 1H), 6.16 (brs, 1H);  $^{13}\text{C NMR}$  (100 MHz,  $\text{CDCl}_3$ )  $\delta$  197.9, 194.4, 159.8, 146.0, 137.9, 137.1, 136.9, 128.6, 127.9, 125.5, 125.4, 119.0, 118.2, 111.7, 71.0; **M.p.**: 154-156  $^\circ\text{C}$ ; **HRMS** Calcd. for  $\text{C}_{17}\text{H}_{14}\text{NO}_2^+ [\text{M}+\text{H}]^+$ : 264.1019, found: 264.1012.

$[\alpha]_D^{20} = -439.0$  (c 0.20,  $\text{CH}_2\text{Cl}_2$ ) for 94% ee; Enantiomeric excess was determined by HPLC with a Chiralcel OD-H column, Hexane/ $i$ PrOH = 90/10, 0.5 mL/min, 230 nm,  $t_{\text{minor}} = 34.447$  min,  $t_{\text{major}} = 32.086$  min.

### Racemic Sample of 3ae

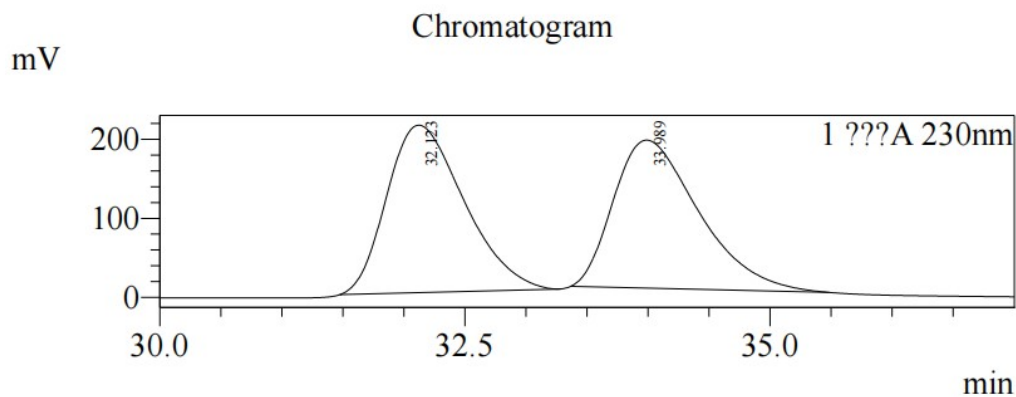

Peak Table

| Peak# | Ret. Time | Area     | Height | Area%   |
|-------|-----------|----------|--------|---------|
| 1     | 32.123    | 9312471  | 211723 | 50.620  |
| 2     | 33.989    | 9084251  | 187188 | 49.380  |
| Total |           | 18396722 | 398912 | 100.000 |

### Enantiomeric Sample of 3ae

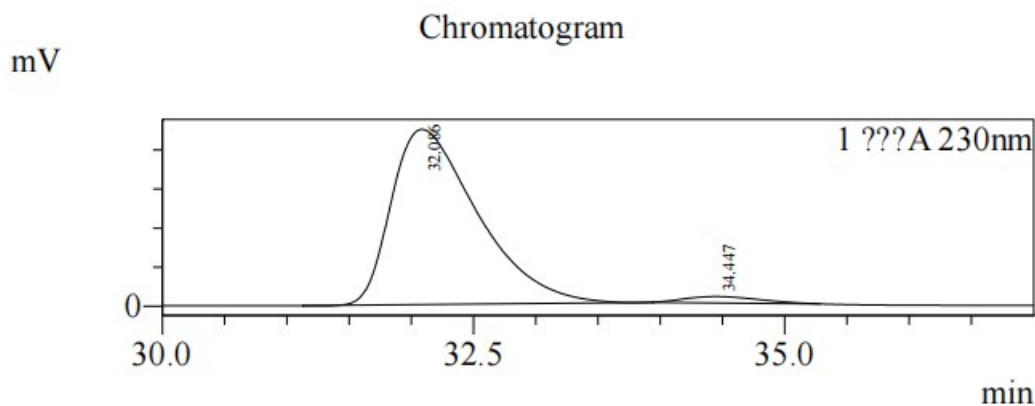

Peak Table

???A 230nm

| Peak# | Ret. Time | Area     | Height | Area%   |
|-------|-----------|----------|--------|---------|
| 1     | 32.086    | 43136270 | 897638 | 96.964  |
| 2     | 34.447    | 1350434  | 32516  | 3.036   |
| Total |           | 44486704 | 930154 | 100.000 |

**(S)-2-(3-oxo-2-(p-tolyl)indolin-2-yl)acrylaldehyde (3be)**

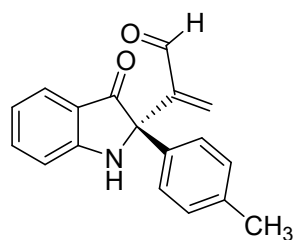

**3be**

Compound **3be** (18.5 mg, 67% yield) was obtained as a yellow solid following the *general procedure III* from **1b** (0.1 mmol, 22.1 mg) and **2e** (0.15 mmol, 8.4 mg, 10  $\mu$ L) stirred for 6 hours.

<sup>1</sup>H NMR (400 MHz, CDCl<sub>3</sub>)  $\delta$  9.55 (s, 1H), 7.58 (d,  $J$  = 7.6 Hz, 1H), 7.49 (t,  $J$  = 8.0 Hz, 1H), 7.31 (d,  $J$  = 8.0 Hz, 2H), 7.12 (d,  $J$  = 8.0 Hz, 2H), 6.92 (d,  $J$  = 8.0 Hz, 2H), 6.80 (t,  $J$  = 7.6 Hz, 1H), 6.38 (s, 1H), 6.13 (brs, 1H), 2.29 (s, 3H); <sup>13</sup>C NMR (100 MHz, CDCl<sub>3</sub>)  $\delta$  198.1, 194.5, 159.8, 146.1, 137.9, 137.7, 137.0, 133.9, 129.4, 125.5, 125.3, 118.9, 118.2, 111.7, 70.9, 21.0; HRMS Calcd. for C<sub>18</sub>H<sub>16</sub>NO<sub>2</sub><sup>+</sup> [M+H]<sup>+</sup>: 278.1176, found: 278.1176; **M.p.**: 119-121 °C.

$[\alpha]_D^{20}$  = -1160.0 (c 0.04, CH<sub>2</sub>Cl<sub>2</sub>) for 94% ee; Enantiomeric excess was determined by HPLC with a Chiralcel OD-H column, Hexane/<sup>i</sup>PrOH = 90/10, 0.5 mL/min, 230 nm,  $t_{\text{minor}}$  = 36.846 min,  $t_{\text{major}}$  = 29.235 min.

**Racemic Sample of 3be**

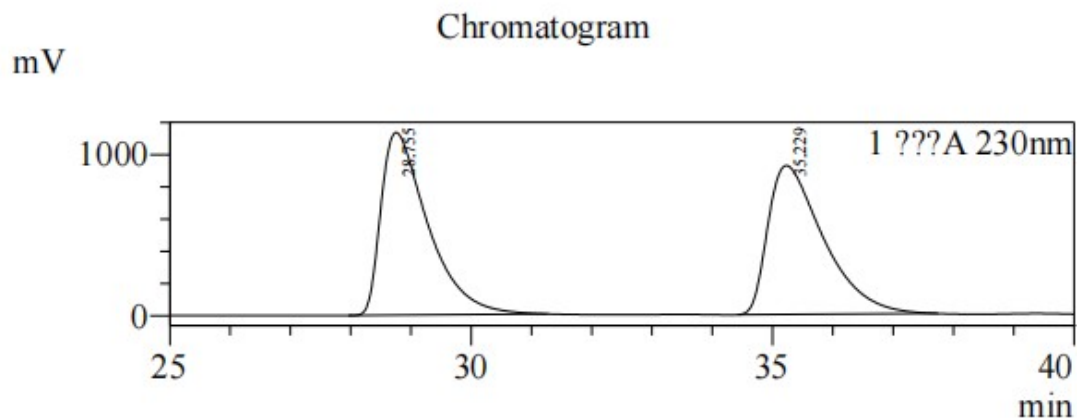

Peak Table

???A 230nm

| Peak# | Ret. Time | Area      | Height  | Area%   |
|-------|-----------|-----------|---------|---------|
| 1     | 28.755    | 61250538  | 1133543 | 50.823  |
| 2     | 35.229    | 59267686  | 923784  | 49.177  |
| Total |           | 120518224 | 2057327 | 100.000 |

**Enantiomeric Sample of 3be**

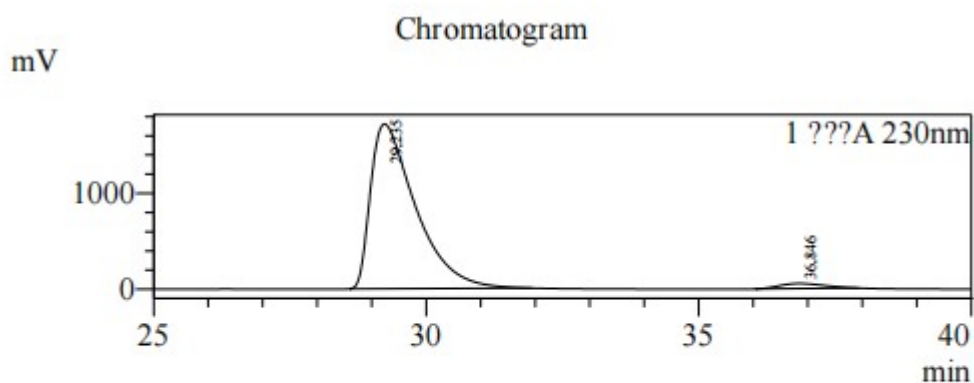

Peak Table

???A 230nm

| Peak# | Ret. Time | Area      | Height  | Area%   |
|-------|-----------|-----------|---------|---------|
| 1     | 29.235    | 98575696  | 1717296 | 97.055  |
| 2     | 36.846    | 2991589   | 53068   | 2.945   |
| Total |           | 101567284 | 1770364 | 100.000 |

**(S)-2-(2-(4-fluorophenyl)-3-oxindolin-2-yl)acrylaldehyde (3ce)**

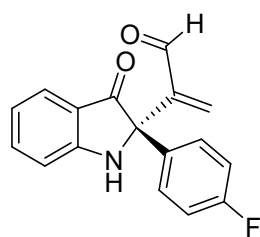

**3ce**

Compound **3ce** (26.3 mg, 94% yield) was obtained as a yellow solid following the *general procedure III* from **1c** (0.1 mmol, 22.5 mg) and **2e** (0.15 mmol, 8.4 mg, 10  $\mu$ L) stirred for 6 hours.

$^1\text{H NMR}$  (400 MHz,  $\text{CDCl}_3$ )  $\delta$  9.53 (s, 1H), 7.58 (d,  $J = 8.0$  Hz, 1H), 7.50 (t,  $J = 8.0$  Hz, 1H), 7.45-7.41 (m, 2H), 6.99 (t,  $J = 8.4$  Hz, 2H), 6.93-6.90 (m, 2H), 6.82 (t,  $J = 7.6$  Hz, 1H), 6.39 (s, 1H), 6.15 (brs, 1H);  $^{13}\text{C NMR}$  (100 MHz,  $\text{CDCl}_3$ )  $\delta$  197.8, 194.4, 162.5 (d,  $J = 245.5$  Hz), 159.7, 145.9, 138.1, 137.3, 132.7 (d,  $J = 2.9$  Hz), 127.3 (d,  $J = 8.1$  Hz), 125.5, 119.2, 118.1, 115.5 (d,  $J = 21.6$  Hz), 111.8, 70.5;  $^{19}\text{F NMR}$  (376 MHz,  $\text{CDCl}_3$ )  $\delta$  -114.7 (s); **HRMS** Calcd. for  $\text{C}_{17}\text{H}_{13}\text{NO}_2\text{F}^+$   $[\text{M}+\text{H}]^+$ : 282.0925, found: 282.0922; **M.p.**: 118-120  $^\circ\text{C}$ .

$[\alpha]_D^{20} = -480.0$  (c 0.04,  $\text{CH}_2\text{Cl}_2$ ) for 94% ee; Enantiomeric excess was determined by HPLC with a Chiralcel OD-H column, Hexane/ $i$ PrOH = 90/10, 0.5 mL/min, 230 nm,  $t_{\text{minor}} = 38.129$  min,  $t_{\text{major}} = 30.637$  min.

### Racemic Sample of 3ce

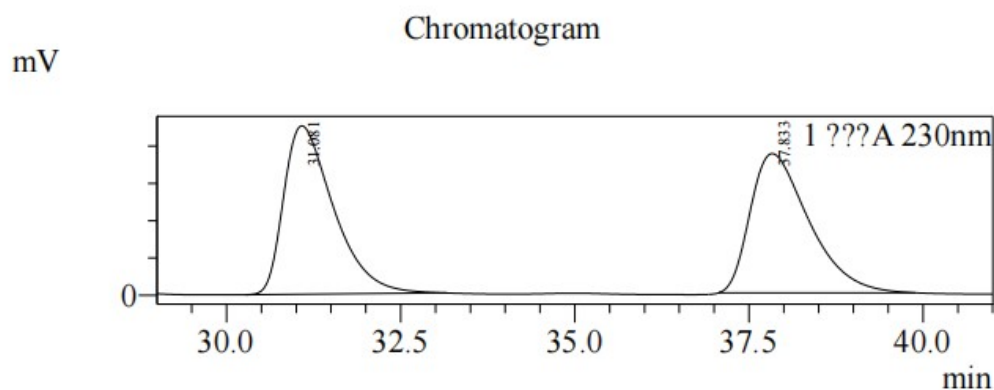

Peak Table

| Peak# | Ret. Time | Area     | Height | Area%   |
|-------|-----------|----------|--------|---------|
| 1     | 31.081    | 22480732 | 451120 | 50.747  |
| 2     | 37.833    | 21818893 | 372721 | 49.253  |
| Total |           | 44299625 | 823841 | 100.000 |

### Enantiomeric Sample of 3ce



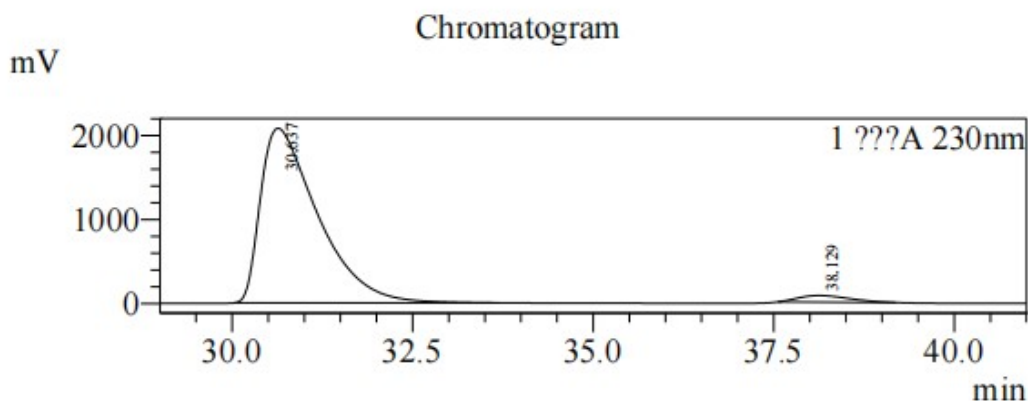

Peak Table

???A 230nm

| Peak# | Ret. Time | Area      | Height  | Area%   |
|-------|-----------|-----------|---------|---------|
| 1     | 30.637    | 114699328 | 2077015 | 96.805  |
| 2     | 38.129    | 3785617   | 77356   | 3.195   |
| Total |           | 118484945 | 2154371 | 100.000 |

**(S)-2-(2-(4-chlorophenyl)-3-oxoindolin-2-yl)acrylaldehyde (3de)**

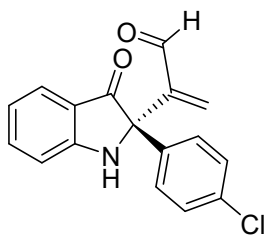

**3de**

Compound **3de** (25.9 mg, 87% yield) was obtained as a yellow solid following the *general procedure III* from **1d** (0.1 mmol, 24.1 mg) and **2e** (0.15 mmol, 8.4 mg, 10  $\mu$ L) stirred for 6 hours.

$^1\text{H NMR}$  (400 MHz,  $\text{CDCl}_3$ )  $\delta$  9.53 (s, 1H), 7.58 (d,  $J = 7.6$  Hz, 1H), 7.50 (t,  $J = 8.0$  Hz, 1H), 7.39 (d,  $J = 8.4$  Hz, 2H), 7.21 (d,  $J = 8.4$  Hz, 2H), 6.92 (d,  $J = 8.4$  Hz, 1H), 6.89 (s, 1H), 6.82 (t,  $J = 7.6$  Hz, 1H), 6.40 (s, 1H), 6.12 (brs, 1H);  $^{13}\text{C NMR}$  (100 MHz,  $\text{CDCl}_3$ )  $\delta$  197.5, 194.4, 159.7, 145.7, 138.1, 137.4, 135.6, 133.9, 128.8, 127.0, 125.6, 119.3, 118.1, 111.8, 70.5; **HRMS** Calcd. for  $\text{C}_{17}\text{H}_{13}\text{NO}_2\text{Cl}^+$   $[\text{M}+\text{H}]^+$ : 298.0629, found: 298.0627; **M.p.**: 145-148  $^\circ\text{C}$ .

$[\alpha]_{\text{D}}^{20} = -1043.6$  (c 0.07,  $\text{CH}_2\text{Cl}_2$ ) for 90% ee; Enantiomeric excess was determined by HPLC with a Chiralcel OD-H column, Hexane/ $i$ PrOH = 90/10, 0.5 mL/min, 230 nm,  $t_{\text{minor}} = 41.556$  min,  $t_{\text{major}} = 34.505$  min.

### Racemic Sample of 3de

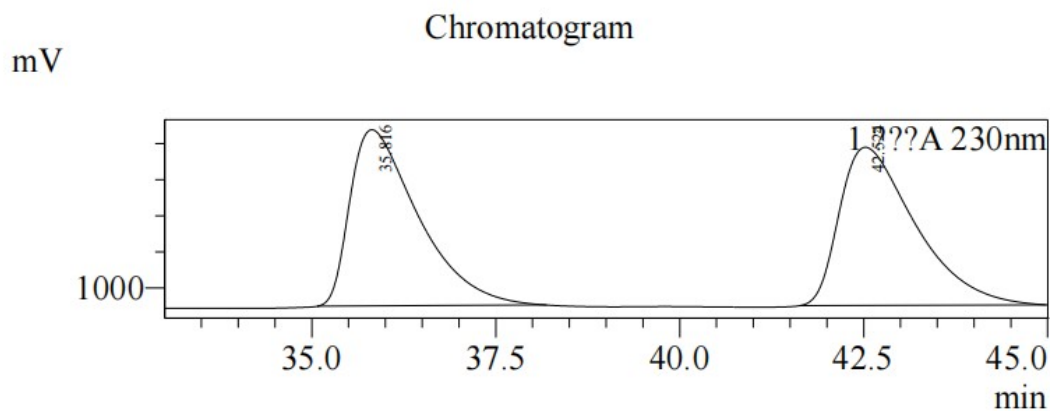

Peak Table

???A 230nm

| Peak# | Ret. Time | Area     | Height | Area%   |
|-------|-----------|----------|--------|---------|
| 1     | 35.816    | 31503862 | 488140 | 50.117  |
| 2     | 42.524    | 31357187 | 438212 | 49.883  |
| Total |           | 62861050 | 926352 | 100.000 |

### Enantiomeric Sample of 3de

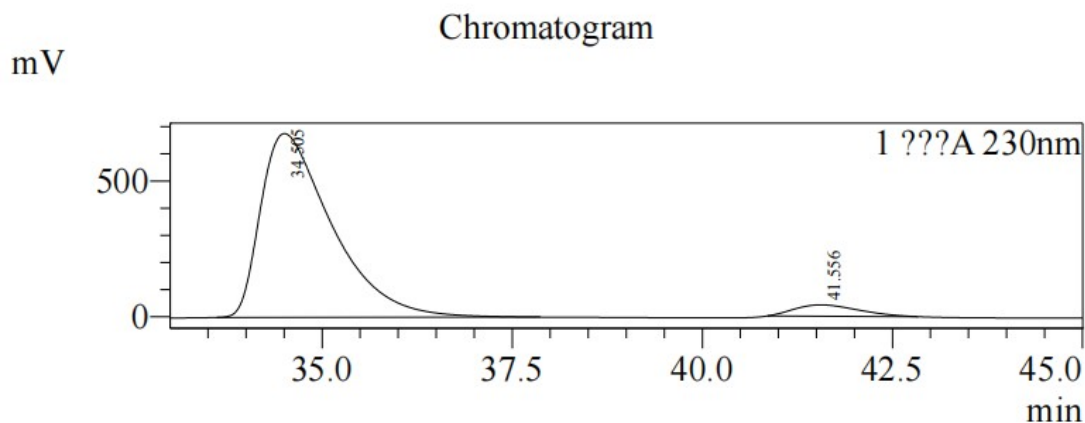

Peak Table

???A 230nm

| Peak# | Ret. Time | Area     | Height | Area%   |
|-------|-----------|----------|--------|---------|
| 1     | 34.505    | 44077070 | 676629 | 94.770  |
| 2     | 41.556    | 2432440  | 41619  | 5.230   |
| Total |           | 46509509 | 718247 | 100.000 |

**(S)-2-(2-(4-bromophenyl)-3-oxindolin-2-yl)acrylaldehyde (3ee)**

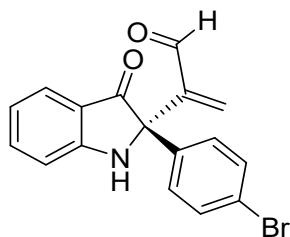

### 3ee

Compound **3ee** (23 mg, 67% yield) was obtained as a yellow solid following the *general procedure III* from **1e** (0.1 mmol, 28.4 mg) and **2e** (0.15 mmol, 8.4 mg, 10  $\mu$ L) stirred for 6 hours.

$^1\text{H NMR}$  (400 MHz,  $\text{CDCl}_3$ )  $\delta$  9.53 (s, 1H), 7.58 (d,  $J = 7.6$  Hz, 1H), 7.50 (t,  $J = 7.6$  Hz, 1H), 7.43 (d,  $J = 8.8$  Hz, 2H), 7.33 (d,  $J = 8.8$  Hz, 2H), 6.93 (d,  $J = 8.4$  Hz, 1H), 6.89 (s, 1H), 6.83 (t,  $J = 7.6$  Hz, 1H), 6.40 (s, 1H), 6.12 (brs, 1H);  $^{13}\text{C NMR}$  (100 MHz,  $\text{CDCl}_3$ )  $\delta$  197.4, 194.3, 159.7, 145.7, 138.2, 137.4, 136.2, 131.7, 127.3, 125.6, 122.2, 119.3, 118.1, 111.9, 70.6; **HRMS** Calcd. for  $\text{C}_{17}\text{H}_{13}\text{NO}_2\text{Br}^+$   $[\text{M}+\text{H}]^+$ : 342.0124, found: 342.0123; **M.p.**: 115-117  $^\circ\text{C}$ .

$[\alpha]_D^{20} = -815.0$  (c 0.04,  $\text{CH}_2\text{Cl}_2$ ) for 91% ee; Enantiomeric excess was determined by HPLC with a Chiralcel OD-H column, Hexane/ $i$ PrOH = 90/10, 0.5 mL/min, 230 nm,  $t_{\text{minor}} = 44.565$  min,  $t_{\text{major}} = 36.272$  min.

### Racemic Sample of 3ee

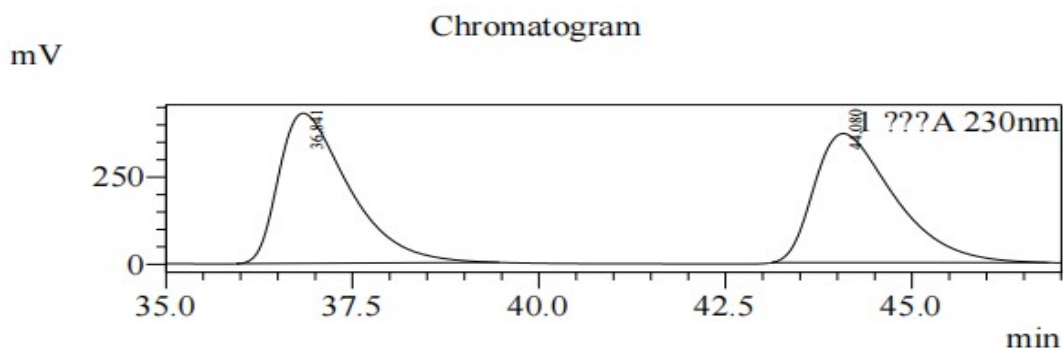

Peak Table

???A 230nm

| Peak# | Ret. Time | Area     | Height | Area%   |
|-------|-----------|----------|--------|---------|
| 1     | 36.841    | 28218864 | 430560 | 50.544  |
| 2     | 44.080    | 27611359 | 370127 | 49.456  |
| Total |           | 55830222 | 800687 | 100.000 |

### Enantiomeric Sample of 3ee

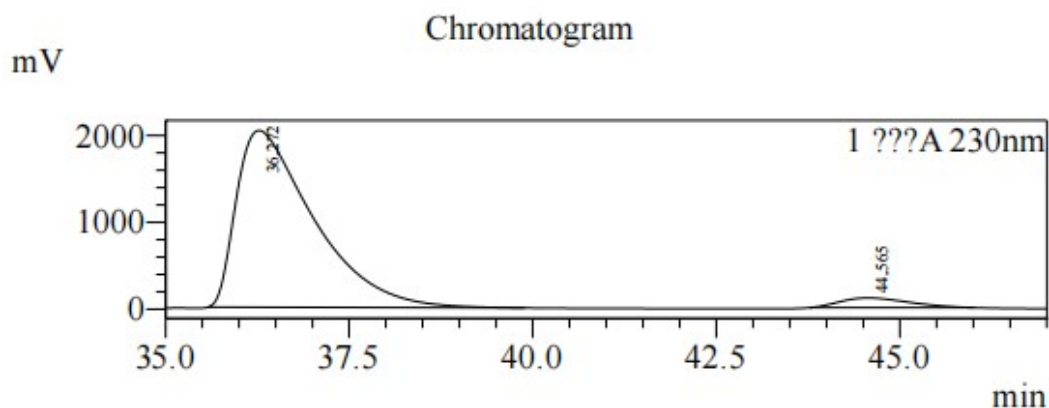

Peak Table

???A 230nm

| Peak# | Ret. Time | Area      | Height  | Area%   |
|-------|-----------|-----------|---------|---------|
| 1     | 36.272    | 148688277 | 2035137 | 95.341  |
| 2     | 44.565    | 7265240   | 111244  | 4.659   |
| Total |           | 155953517 | 2146381 | 100.000 |

**(S)-2-(2-(3-bromophenyl)-3-oxoindolin-2-yl)acrylaldehyde (3fe)**

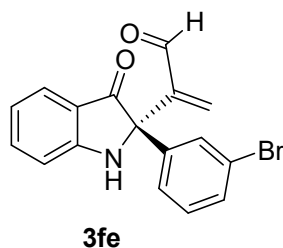

Compound **3fe** (25.6 mg, 75% yield) was obtained as a yellow solid following the *general procedure III* from **1f** (0.1 mmol, 28.4 mg) and **2e** (0.15 mmol, 8.4 mg, 10  $\mu$ L) stirred for 6 hours.

<sup>1</sup>H NMR (400 MHz, CDCl<sub>3</sub>)  $\delta$  9.53 (s, 1H), 7.59 (d,  $J$  = 9.2 Hz, 2H), 7.51 (t,  $J$  = 8.0 Hz, 1H), 7.38 (d,  $J$  = 8.0 Hz, 2H), 7.18 (t,  $J$  = 8.0 Hz, 1H), 6.93 (d,  $J$  = 8.0 Hz, 1H), 6.90 (s, 1H), 6.83 (t,  $J$  = 7.6 Hz, 1H), 6.41 (s, 1H), 6.14 (brs, 1H); <sup>13</sup>C NMR (100 MHz, CDCl<sub>3</sub>)  $\delta$  197.2, 194.3, 159.7, 145.6, 139.4, 138.2, 137.6, 131.0, 130.1, 128.5, 125.6, 124.3, 122.8, 119.3, 118.0, 111.9, 70.5; HRMS Calcd. for C<sub>17</sub>H<sub>13</sub>NO<sub>2</sub>Br<sup>+</sup> [M+H]<sup>+</sup>: 342.0124, found: 342.0123; **M.p.**: 142-144 °C.

$[\alpha]_D^{20}$  = -777.5 (c 0.04, CH<sub>2</sub>Cl<sub>2</sub>) for 90% ee; Enantiomeric excess was determined by HPLC with a Chiralcel OD-H column, Hexane/*i*PrOH = 90/10, 0.5 mL/min, 230 nm,  $t_{\text{minor}}$  = 39.394 min,  $t_{\text{major}}$  = 33.075 min.

### Racemic Sample of 3fe

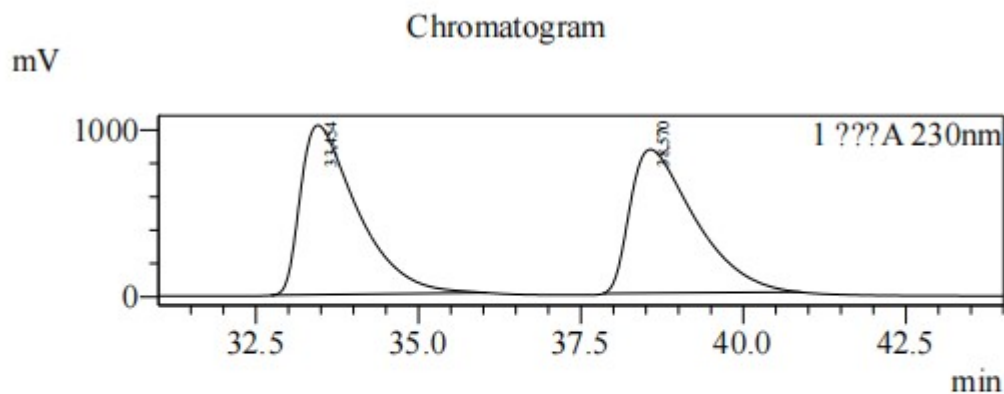

Peak Table

???A 230nm

| Peak# | Ret. Time | Area      | Height  | Area%   |
|-------|-----------|-----------|---------|---------|
| 1     | 33.454    | 61875702  | 1015651 | 50.869  |
| 2     | 38.570    | 59761028  | 860719  | 49.131  |
| Total |           | 121636729 | 1876369 | 100.000 |

### Enantiomeric Sample of 3fe

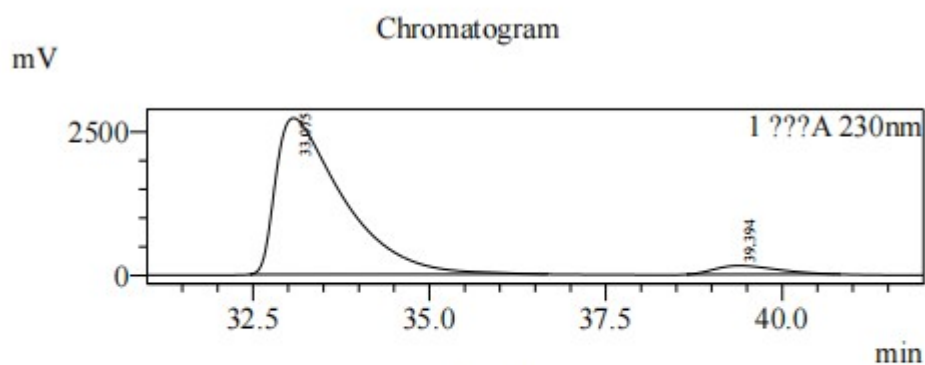

Peak Table

???A 230nm

| Peak# | Ret. Time | Area      | Height  | Area%   |
|-------|-----------|-----------|---------|---------|
| 1     | 33.075    | 180244203 | 2715744 | 95.117  |
| 2     | 39.394    | 9252187   | 150420  | 4.883   |
| Total |           | 189496389 | 2866164 | 100.000 |

### (R)-2-(2-(2-bromophenyl)-3-oxoindolin-2-yl)acrylaldehyde (3ge)

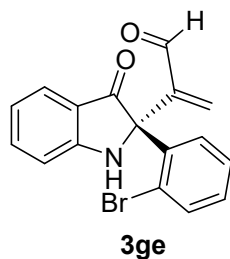

Compound **3ge** (13.7 mg, 40% yield) was obtained as a yellow solid following the

general procedure III from **1g** (0.1 mmol, 28.4 mg) and **2e** (0.15 mmol, 8.4 mg, 10  $\mu$ L) stirred for 36 hours.

$^1\text{H NMR}$  (400 MHz,  $\text{CDCl}_3$ )  $\delta$  9.64 (s, 1H), 7.69 (d,  $J = 7.6$  Hz, 1H), 7.61 (d,  $J = 8.0$  Hz, 1H), 7.49 (t,  $J = 7.6$  Hz, 1H), 7.32-7.27 (m, 2H), 7.19-7.16 (m, 1H), 6.89-6.84 (m, 2H), 6.40 (d,  $J = 12.0$  Hz, 2H), 6.25 (brs, 1H);  $^{13}\text{C NMR}$  (100 MHz,  $\text{CDCl}_3$ )  $\delta$  198.0, 193.1, 159.9, 145.5, 137.72, 137.67, 136.3, 135.2, 130.5, 129.8, 127.5, 125.0, 123.0, 120.2, 119.4, 112.5, 73.5; **M.p.:** 169-171  $^\circ\text{C}$ ; **HRMS** Calcd. for  $\text{C}_{17}\text{H}_{13}\text{BrNO}_2^+ [\text{M}+\text{H}]^+$ : 342.0124, found: 342.0132.

$[\alpha]_D^{20} = -1.82$  (c 0.11,  $\text{CH}_2\text{Cl}_2$ ) for 11% ee; Enantiomeric excess was determined by HPLC with a Chiralcel OD-H column, Hexane/ $i$ PrOH = 90/10, 0.5 mL/min, 230 nm,  $t_{\text{minor}} = 91.515$  min,  $t_{\text{major}} = 43.878$  min.

### Racemic Sample of 3ge

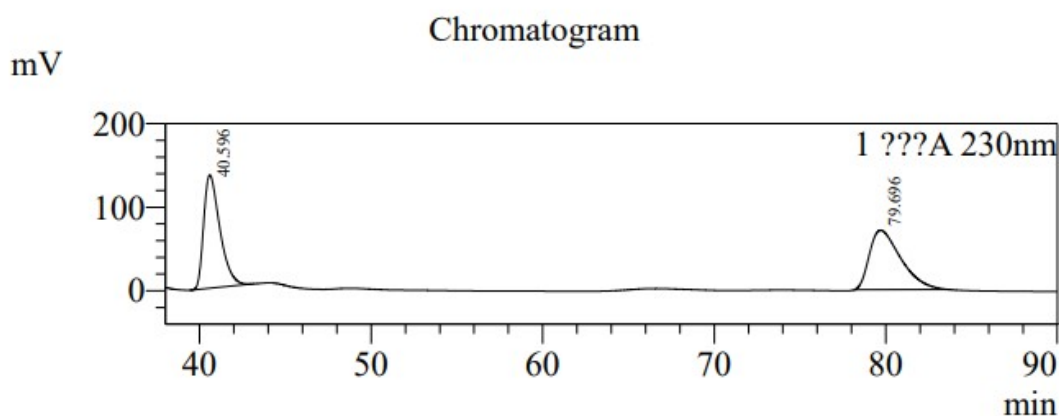

Peak Table

???A 230nm

| Peak# | Ret. Time | Area     | Height | Area%   |
|-------|-----------|----------|--------|---------|
| 1     | 40.596    | 8914589  | 135499 | 49.592  |
| 2     | 79.696    | 9061226  | 71103  | 50.408  |
| Total |           | 17975815 | 206601 | 100.000 |

### Enantiomeric Sample of 3ge

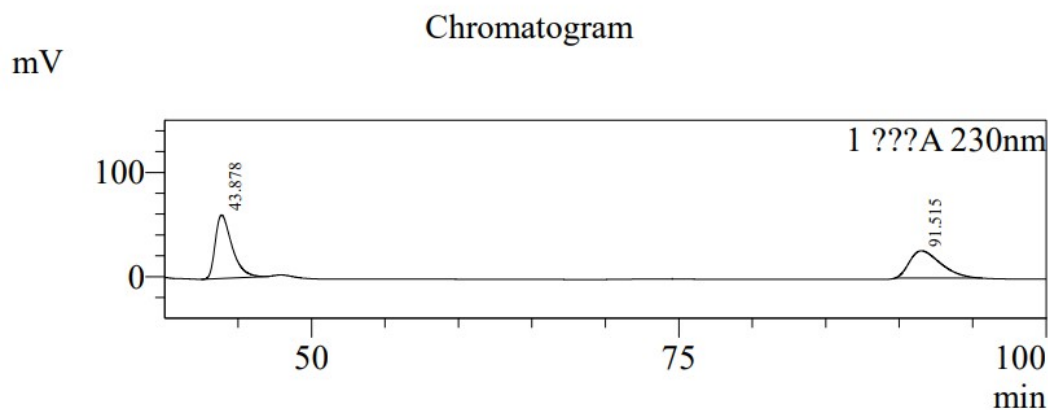

Peak Table

???A 230nm

| Peak# | Ret. Time | Area    | Height | Area%   |
|-------|-----------|---------|--------|---------|
| 1     | 43.878    | 4806142 | 60920  | 55.263  |
| 2     | 91.515    | 3890761 | 26238  | 44.737  |
| Total |           | 8696903 | 87159  | 100.000 |

**(S)-2-(3-oxo-2-(o-tolyl)indolin-2-yl)acrylaldehyde (3he)**

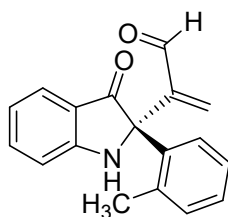

**3he**

Compound **3he** (11.9 mg, 43% yield) was obtained as a yellow solid following the *general procedure III* from **1h** (0.1 mmol, 22.1 mg) and **2e** (0.15 mmol, 8.4 mg, 10  $\mu$ L) stirred for 6 hours.

$^1\text{H NMR}$  (400 MHz,  $\text{CDCl}_3$ )  $\delta$  9.70 (s, 1H), 7.67 (d,  $J = 8.0$  Hz, 1H), 7.51-7.47 (m, 1H), 7.21-7.17 (m, 1H), 7.13 (t,  $J = 4.0$  Hz, 3H), 6.88-6.83 (m, 2H), 6.62 (s, 1H), 6.41 (s, 1H), 6.03 (brs, 1H), 2.18 (s, 3H);  $^{13}\text{C NMR}$  (125 MHz,  $\text{CDCl}_3$ )  $\delta$  199.2, 194.4, 159.3, 145.9, 137.8, 137.6, 136.9, 135.3, 132.5, 128.5, 128.3, 125.9, 125.0, 119.8, 119.2, 112.3, 21.0; **M.p.**: 125-127  $^\circ\text{C}$ ; **HRMS** Calcd. for  $\text{C}_{18}\text{H}_{16}\text{NO}_2^+$   $[\text{M}+\text{H}]^+$ : 278.1176, found: 278.1180.

$[\alpha]_D^{20} = -15.0$  (c 0.04,  $\text{CH}_2\text{Cl}_2$ ) for 9% ee; Enantiomeric excess was determined by HPLC with a Chiralcel OD-H column, Hexane/*i*PrOH = 90/10, 0.5 mL/min, 230 nm,  $t_{\text{minor}} = 76.915$  min,  $t_{\text{major}} = 38.117$  min.

### Racemic Sample of 3he

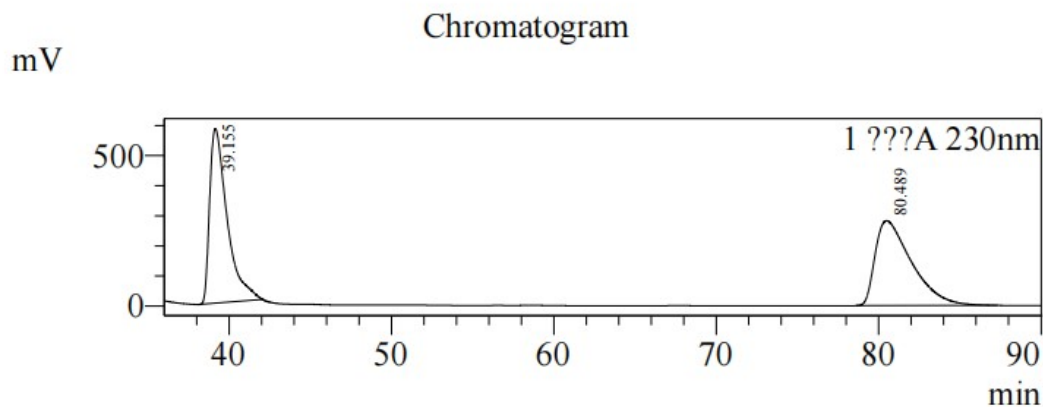

Peak Table

???A 230nm

| Peak# | Ret. Time | Area     | Height | Area%   |
|-------|-----------|----------|--------|---------|
| 1     | 39.155    | 43479462 | 579871 | 49.754  |
| 2     | 80.489    | 43909926 | 281827 | 50.246  |
| Total |           | 87389388 | 861697 | 100.000 |

### Enantiomeric Sample of 3he

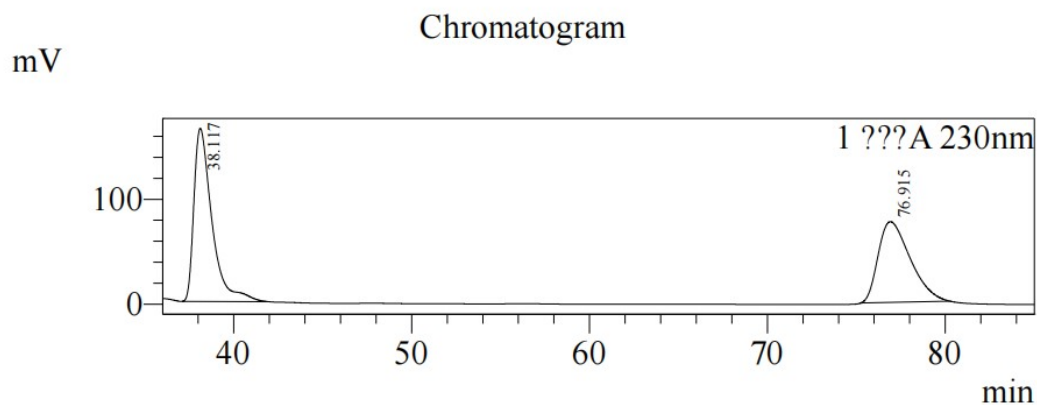

Peak Table

???A 230nm

| Peak# | Ret. Time | Area     | Height | Area%   |
|-------|-----------|----------|--------|---------|
| 1     | 38.117    | 11654307 | 165168 | 54.696  |
| 2     | 76.915    | 9653024  | 76959  | 45.304  |
| Total |           | 21307330 | 242127 | 100.000 |

**(S)-2-(3-oxo-2-(4-(trifluoromethyl)phenyl)indolin-2-yl)acrylaldehyde (3ie)**



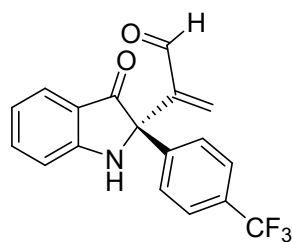

### 3ie

Compound **3ie** (26.9 mg, 81% yield) was obtained as a yellow solid following the *general procedure III* from **1i** (0.1 mmol, 27.5 mg) and **2e** (0.15 mmol, 8.4 mg, 10  $\mu$ L) stirred for 6 hours.

$^1\text{H NMR}$  (400 MHz,  $\text{CDCl}_3$ )  $\delta$  9.54 (s, 1H), 7.61-7.51 (m, 6H), 6.97-6.93 (m, 2H), 6.85 (t,  $J = 7.6$  Hz, 1H), 6.44 (s, 1H), 6.16 (brs, 1H);  $^{13}\text{C NMR}$  (100 MHz,  $\text{CDCl}_3$ )  $\delta$  197.1, 194.3, 159.7, 145.7, 141.1, 138.3, 137.6, 130.1 (q,  $J = 32.2$  Hz), 126.0, 125.6 (q,  $J = 3.7$  Hz), 124.0 (q,  $J = 270.9$  Hz), 119.5, 118.0, 111.9, 99.9, 70.8;  $^{19}\text{F NMR}$  (376 MHz,  $\text{CDCl}_3$ )  $\delta$  -62.5 (s); **HRMS** Calcd. for  $\text{C}_{18}\text{H}_{13}\text{NO}_2\text{F}_3^+$   $[\text{M}+\text{H}]^+$ : 332.0893, found: 332.0887; **M.p.**: 115-117  $^\circ\text{C}$ .

$[\alpha]_D^{20} = -555.0$  (c 0.05,  $\text{CH}_2\text{Cl}_2$ ) for 87% ee; Enantiomeric excess was determined by HPLC with a Chiralcel OD-H column, Hexane/ $i$ PrOH = 90/10, 0.5 mL/min, 230 nm,  $t_{\text{minor}} = 34.681$  min,  $t_{\text{major}} = 27.444$  min.

### Racemic Sample of 3ie

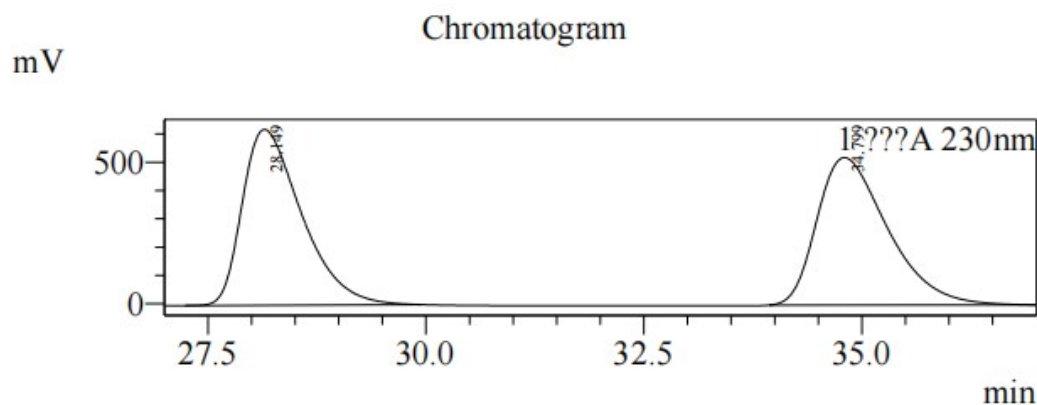

Peak Table

230nm

| Peak# | Ret. Time | Area     | Height  | Area%   |
|-------|-----------|----------|---------|---------|
| 1     | 28.149    | 29387205 | 621245  | 49.968  |
| 2     | 34.799    | 29425233 | 521001  | 50.032  |
| Total |           | 58812438 | 1142246 | 100.000 |

### Enantiomeric Sample of 3ie

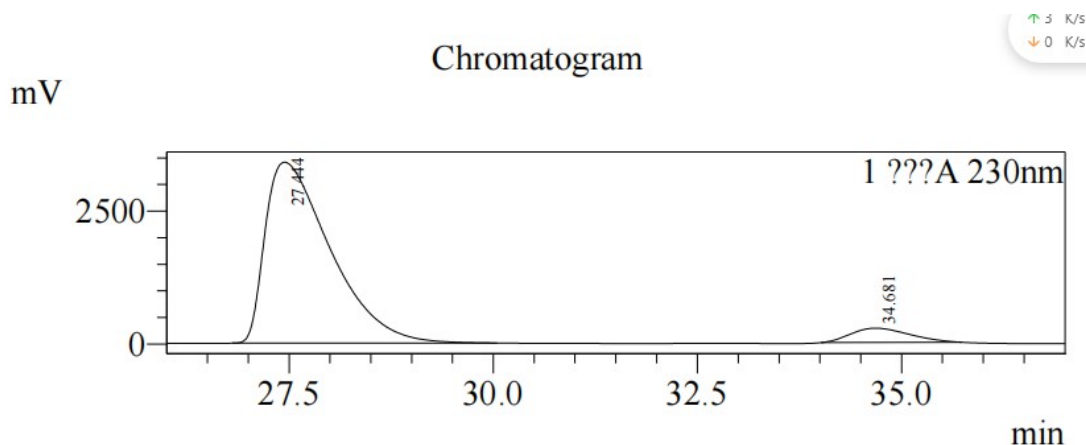

Peak Table

???A 230nm

| Peak# | Ret. Time | Area      | Height  | Area%   |
|-------|-----------|-----------|---------|---------|
| 1     | 27.444    | 188756040 | 3404147 | 93.391  |
| 2     | 34.681    | 13356971  | 268050  | 6.609   |
| Total |           | 202113011 | 3672197 | 100.000 |

**(S)-2-(2-(3,5-bis(trifluoromethyl)phenyl)-3-oxoindolin-2-yl)acrylaldehyde (3je)**

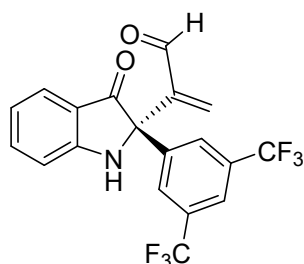

**3je**

Compound **3je** (25.6 mg, 64% yield) was obtained as a yellow solid following the *general procedure III* from **1j** (0.1 mmol, 34.3 mg) and **2e** (0.15 mmol, 8.4 mg, 10  $\mu$ L) stirred for 6 hours.

$^1\text{H NMR}$  (400 MHz,  $\text{CDCl}_3$ )  $\delta$  9.54 (s, 1H), 7.96 (s, 2H), 7.79 (s, 1H), 7.62-7.54 (m, 2H), 7.01 (d,  $J = 8.0$  Hz, 1H), 6.95 (s, 1H), 6.90 (t,  $J = 7.6$  Hz, 1H), 6.49 (s, 1H), 6.14 (brs, 1H);  $^{13}\text{C NMR}$  (100 MHz,  $\text{CDCl}_3$ )  $\delta$  196.3, 194.2, 159.7, 145.3, 140.1, 138.6, 138.3, 131.8 (q,  $J = 33.3$  Hz), 126.1 (q,  $J = 3.5$  Hz), 125.6, 123.2 (q,  $J = 271.4$  Hz), 122.0 (q,  $J = 3.7$  Hz), 120.0, 117.9, 112.4, 70.4;  $^{19}\text{F NMR}$  (376 MHz,  $\text{CDCl}_3$ )  $\delta$  -62.5 (s); **HRMS** Calcd. for  $\text{C}_{19}\text{H}_{12}\text{NO}_2\text{F}_6^+$   $[\text{M}+\text{H}]^+$ : 400.0767, found: 400.0756; **M.p.**: 162-164  $^\circ\text{C}$ .

$[\alpha]_{\text{D}}^{20} = -780.0$  (c 0.04,  $\text{CH}_2\text{Cl}_2$ ) for 88% ee; Enantiomeric excess was determined by

HPLC with a Chiralcel OD-H column, Hexane/*i*PrOH = 90/10, 0.5 mL/min, 230 nm,  
 $t_{\text{minor}} = 19.957 \text{ min}$ ,  $t_{\text{major}} = 13.945 \text{ min}$ .

**Racemic Sample of 3je**

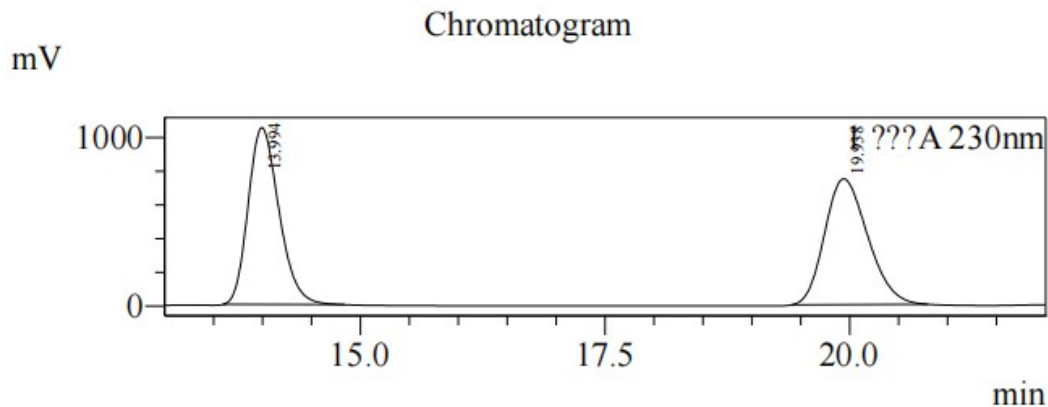

Peak Table

???A 230nm

| Peak# | Ret. Time | Area     | Height  | Area%   |
|-------|-----------|----------|---------|---------|
| 1     | 13.994    | 23052224 | 1049306 | 50.221  |
| 2     | 19.938    | 22848925 | 746126  | 49.779  |
| Total |           | 45901148 | 1795432 | 100.000 |

**Enantiomeric Sample of 3je**

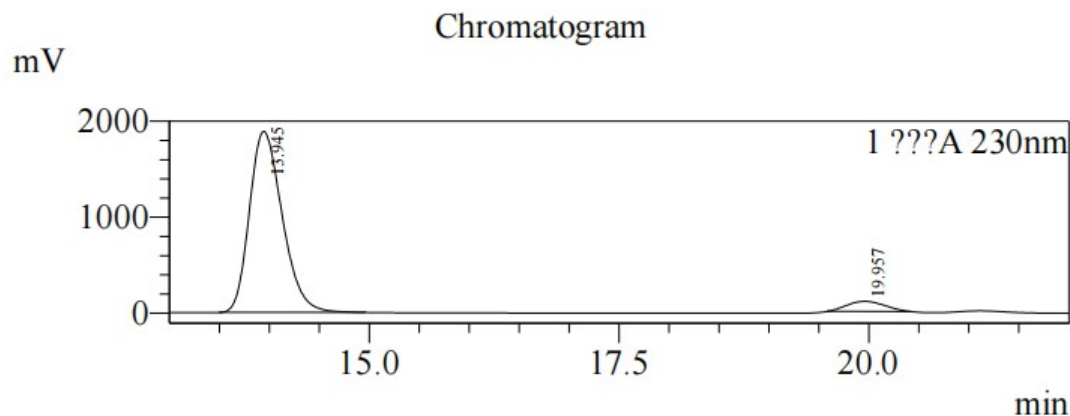

Peak Table

???A 230nm

| Peak# | Ret. Time | Area     | Height  | Area%   |
|-------|-----------|----------|---------|---------|
| 1     | 13.945    | 43154932 | 1886348 | 93.972  |
| 2     | 19.957    | 2768208  | 105255  | 6.028   |
| Total |           | 45923140 | 1991602 | 100.000 |

**(S)-4-(3-oxo-2-(3-oxoprop-1-en-2-yl)indolin-2-yl)benzotrile**

**(3ke)**

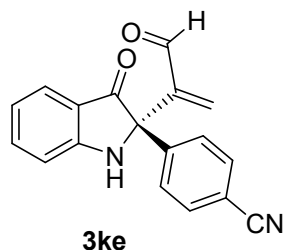

Compound **3ke** (20.1 mg, 70% yield) was obtained as a yellow solid following the *general procedure III* from **1k** (0.1 mmol, 23.2 mg) and **2e** (0.15 mmol, 8.4 mg, 10  $\mu$ L) stirred for 6 hours.

$^1\text{H NMR}$  (400 MHz,  $\text{CDCl}_3$ )  $\delta$  9.53 (s, 1H), 7.61-7.51 (m, 6H), 6.98-6.84 (m, 3H), 6.45 (s, 1H), 6.14 (brs, 1H);  $^{13}\text{C NMR}$  (100 MHz,  $\text{CDCl}_3$ )  $\delta$  196.6, 194.2, 159.7, 145.5, 142.5, 138.4, 137.8, 132.3, 126.4, 125.6, 119.7, 118.6, 117.9, 112.1, 111.7, 70.8; **HRMS** Calcd. for  $\text{C}_{18}\text{H}_{13}\text{N}_2\text{O}_2^+ [\text{M}+\text{H}]^+$ : 289.0972, found: 289.0964; **M.p.**: 98-100  $^\circ\text{C}$ .  $[\alpha]_{\text{D}}^{20} = -737.5$  (c 0.40,  $\text{CH}_2\text{Cl}_2$ ) for 87% ee; Enantiomeric excess was determined by HPLC with a Chiralcel OD-H column, Hexane/*i*PrOH = 90/10, 0.5 mL/min, 230 nm,  $t_{\text{minor}} = 110.507$  min,  $t_{\text{major}} = 96.747$  min.

### Racemic Sample of 3ke

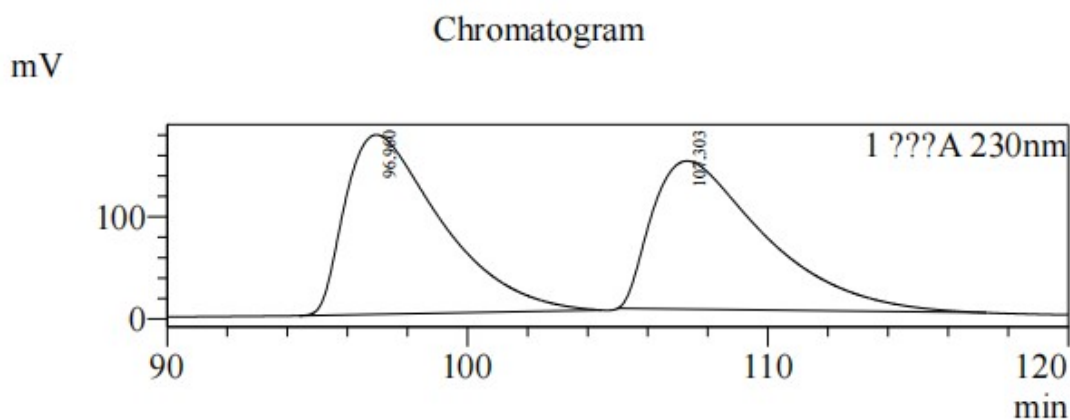

???A 230nm

| Peak# | Ret. Time | Area     | Height | Area%   |
|-------|-----------|----------|--------|---------|
| 1     | 96.960    | 39105651 | 175787 | 50.762  |
| 2     | 107.303   | 37931383 | 145267 | 49.238  |
| Total |           | 77037034 | 321054 | 100.000 |

### Enantiomeric Sample of 3ke

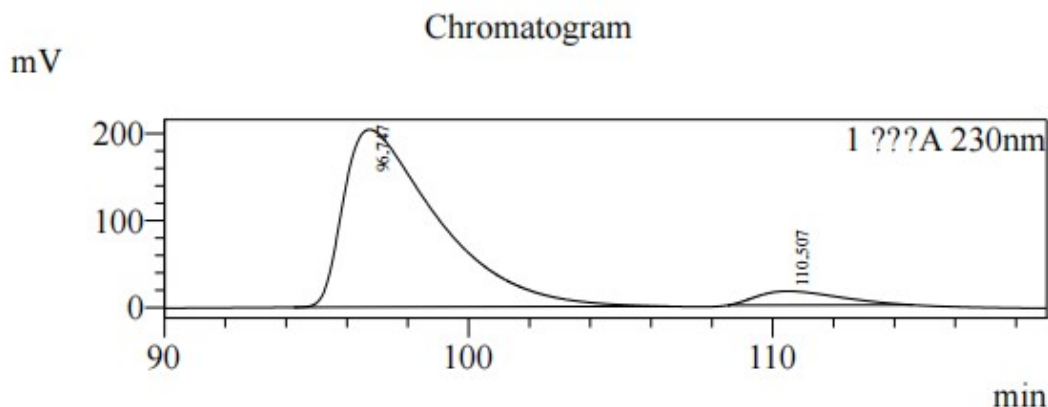

Peak Table

???A 230nm

| Peak# | Ret. Time | Area     | Height | Area%   |
|-------|-----------|----------|--------|---------|
| 1     | 96.747    | 44036993 | 203920 | 93.595  |
| 2     | 110.507   | 3013591  | 16065  | 6.405   |
| Total |           | 47050584 | 219985 | 100.000 |

**(S)-2-(3-oxo-2-(pyridin-4-yl)indolin-2-yl)acrylaldehyde (3le)**

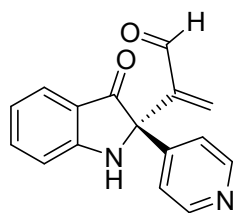

**3le**

Compound **3le** (16.5 mg, 63% yield) was obtained as a yellow solid following the *general procedure III* from **11** (0.1 mmol, 20.8 mg) and **2e** (0.15 mmol, 8.4 mg, 10  $\mu$ L) stirred for 6 hours.

$^1\text{H NMR}$  (400 MHz,  $\text{CDCl}_3$ )  $\delta$  9.53 (s, 1H), 8.54 (d,  $J = 5.6$  Hz, 2H), 7.59 (d,  $J = 8.0$  Hz, 1H), 7.53 (t,  $J = 6.8$  Hz, 1H), 7.39 (d,  $J = 6.4$  Hz, 2H), 6.97-6.94 (m, 2H), 6.85 (t,  $J = 7.6$  Hz, 1H), 6.45 (s, 1H), 6.13 (brs, 1H);  $^{13}\text{C NMR}$  (100 MHz,  $\text{CDCl}_3$ )  $\delta$  196.4, 194.1, 159.8, 150.0, 146.4, 145.4, 138.4, 137.7, 125.6, 120.6, 119.6, 118.0, 112.0, 70.4; **HRMS** Calcd. for  $\text{C}_{16}\text{H}_{13}\text{N}_2\text{O}_2^+$   $[\text{M}+\text{H}]^+$ : 265.0977, found: 265.0972; **M.p.**: 114-115  $^\circ\text{C}$ .

$[\alpha]_{\text{D}}^{20} = -676.4$  (c 0.18,  $\text{CH}_2\text{Cl}_2$ ) for 97% ee; Enantiomeric excess was determined by HPLC with a Chiralcel IB-H column, Hexane/ $i$ PrOH = 80/20, 0.5 mL/min, 230 nm,  $t_{\text{minor}} = 51.126$  min,  $t_{\text{major}} = 54.844$  min.

### Racemic Sample of 3le

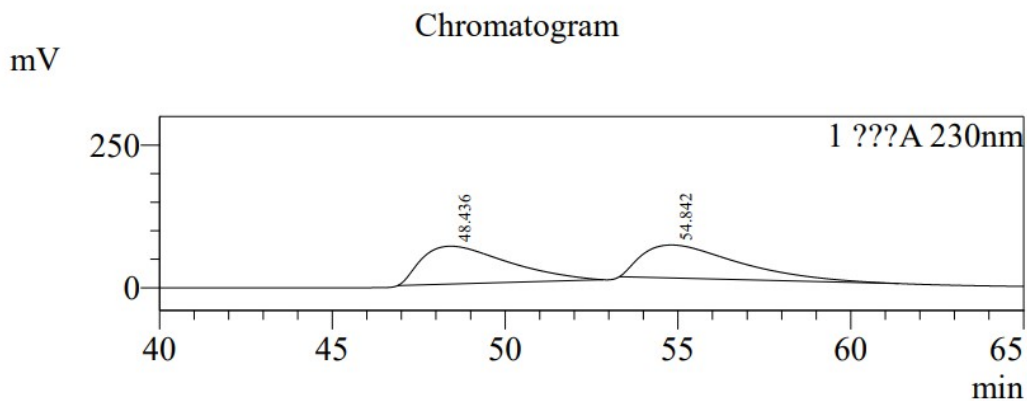

Peak Table

???A 230nm

| Peak# | Ret. Time | Area     | Height | Area%   |
|-------|-----------|----------|--------|---------|
| 1     | 48.436    | 11591436 | 66381  | 50.455  |
| 2     | 54.842    | 11382473 | 57802  | 49.545  |
| Total |           | 22973909 | 124183 | 100.000 |

### Enantiomeric Sample of 3le

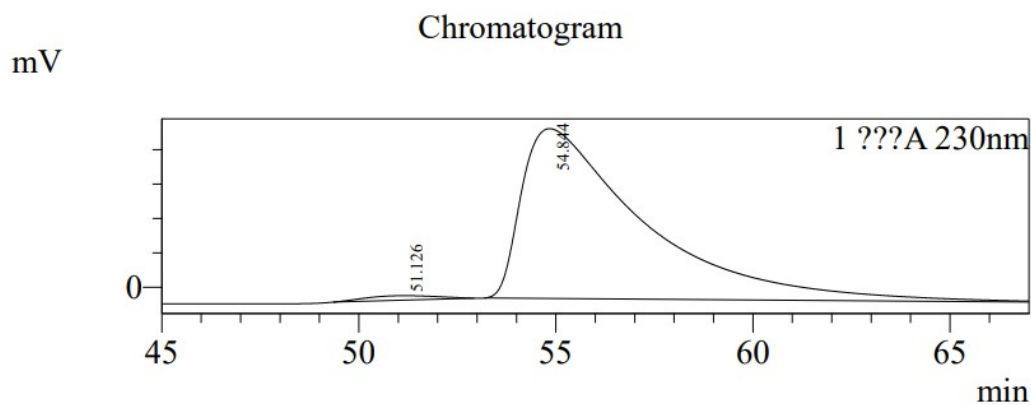

Peak Table

???A 230nm

| Peak# | Ret. Time | Area     | Height | Area%   |
|-------|-----------|----------|--------|---------|
| 1     | 51.126    | 335033   | 2614   | 1.549   |
| 2     | 54.844    | 21300933 | 98756  | 98.451  |
| Total |           | 21635966 | 101370 | 100.000 |

**(S)-2-(3-oxo-2-(thiophen-2-yl)indolin-2-yl)acrylaldehyde (3me)**

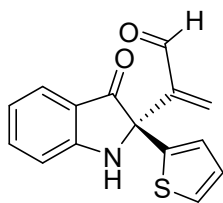

### 3me

Compound **3me** (16.8 mg, 62% yield) was obtained as a yellow solid following the *general procedure III* from **1m** (0.1 mmol, 21.3 mg) and **2e** (0.15 mmol, 8.4 mg, 10  $\mu$ L) stirred for 6 hours.

$^1\text{H NMR}$  (400 MHz,  $\text{CDCl}_3$ )  $\delta$  9.56 (s, 1H), 7.62 (d,  $J = 7.6$  Hz, 1H), 7.50 (t,  $J = 7.6$  Hz, 1H), 7.19 (d,  $J = 5.2$  Hz, 1H), 7.03 (d,  $J = 3.2$  Hz, 1H), 6.97-6.90 (m, 3H), 6.85 (t,  $J = 7.6$  Hz, 1H), 6.36 (s, 1H), 6.29 (brs, 1H);  $^{13}\text{C NMR}$  (100 MHz,  $\text{CDCl}_3$ )  $\delta$  196.9, 194.1, 159.5, 145.8, 141.9, 138.0, 137.2, 127.6, 125.6, 125.3, 124.8, 119.5, 118.1, 112.0, 69.0; **HRMS** Calcd. for  $\text{C}_{15}\text{H}_{12}\text{NO}_2\text{S}^+$   $[\text{M}+\text{H}]^+$ : 270.0589, found: 270.0583; **M.p.**: 130-132  $^\circ\text{C}$ .

$[\alpha]_{\text{D}}^{20} = -468.0$  (c 0.05,  $\text{CH}_2\text{Cl}_2$ ) for 92% ee; Enantiomeric excess was determined by HPLC with a Chiralcel OD-H column, Hexane/*i*PrOH = 90/10, 0.5 mL/min, 230 nm,  $t_{\text{minor}} = 50.817$  min,  $t_{\text{major}} = 43.986$  min.

### Racemic Sample of 3me

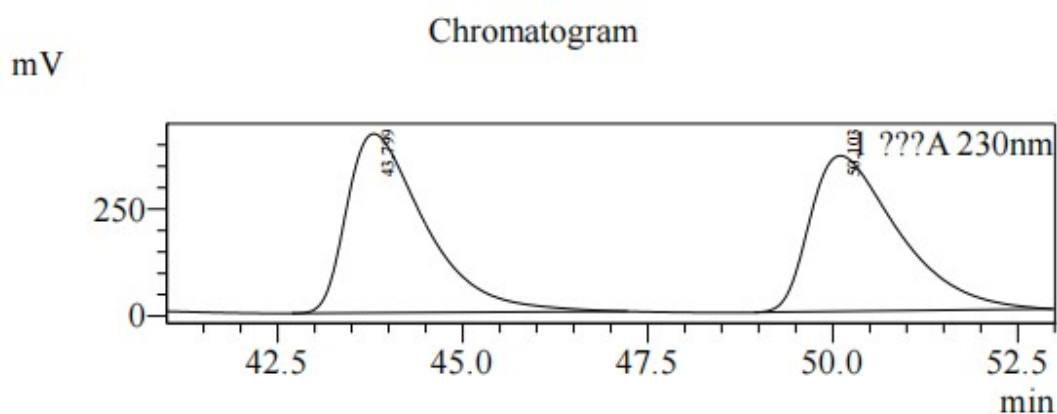

Peak Table

???A 230nm

| Peak# | Ret. Time | Area     | Height | Area%   |
|-------|-----------|----------|--------|---------|
| 1     | 43.799    | 31010242 | 418694 | 50.628  |
| 2     | 50.103    | 30240986 | 363885 | 49.372  |
| Total |           | 61251228 | 782579 | 100.000 |

### Enantiomeric Sample of 3me

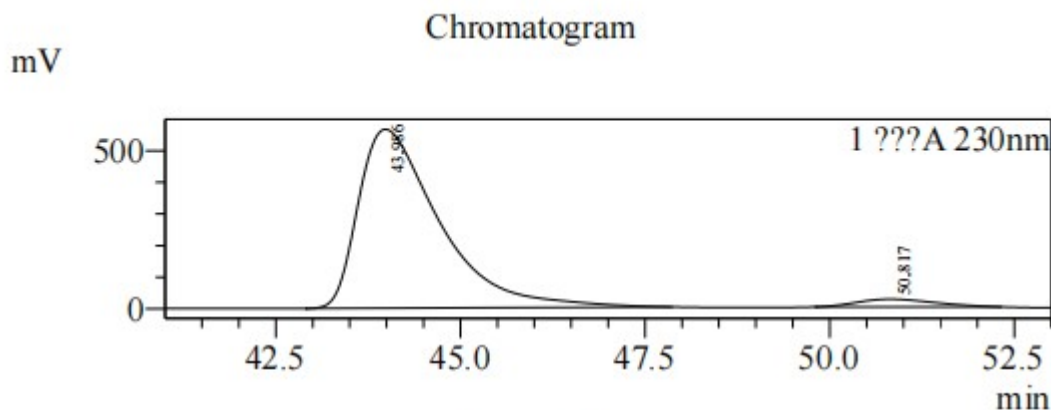

???A 230nm

| Peak# | Ret. Time | Area     | Height | Area%   |
|-------|-----------|----------|--------|---------|
| 1     | 43.986    | 43195569 | 566485 | 96.019  |
| 2     | 50.817    | 1791123  | 24550  | 3.981   |
| Total |           | 44986692 | 591035 | 100.000 |

**(S)-2-(2-(naphthalen-2-yl)-3-oxoindolin-2-yl)acrylaldehyde (3ne)**

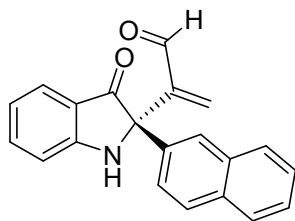

**3ne**

Compound **3ne** (19.0 mg, 61% yield) was obtained as a yellow solid following the *general procedure III* from **1n** (0.1 mmol, 25.7 mg) and **2e** (0.15 mmol, 8.4 mg, 10  $\mu$ L) stirred for 6 hours.

$^1\text{H NMR}$  (400 MHz,  $\text{CDCl}_3$ )  $\delta$  9.58 (s, 1H), 7.91 (s, 1H), 7.80-7.79 (m, 3H), 7.61-7.51 (m, 3H), 7.45-7.44 (m, 2H), 6.99 (s, 2H), 6.84 (t,  $J = 7.6$  Hz, 1H), 6.46 (s, 1H), 6.27 (brs, 1H);  $^{13}\text{C NMR}$  (100 MHz,  $\text{CDCl}_3$ )  $\delta$  197.9, 194.4, 159.8, 145.9, 138.0, 137.4, 134.3, 133.2, 132.9, 128.5, 128.1, 127.5, 126.16, 126.15, 125.6, 124.6, 123.3, 119.1, 118.3, 111.8, 71.1; **HRMS** Calcd. for  $\text{C}_{21}\text{H}_{16}\text{NO}_2^+[\text{M}+\text{H}]^+$ : 314.1176, found: 314.1174; **M.p.**: 84-86  $^\circ\text{C}$ .

$[\alpha]_D^{20} = -423.5$  (c 0.04,  $\text{CH}_2\text{Cl}_2$ ) for 95% ee; Enantiomeric excess was determined by HPLC with a Chiralcel OD-H column, Hexane/*i*PrOH = 90/10, 0.5 mL/min, 230 nm,  $t_{\text{minor}} = 64.359$  min,  $t_{\text{major}} = 52.177$  min.



### Racemic Sample of 3ne

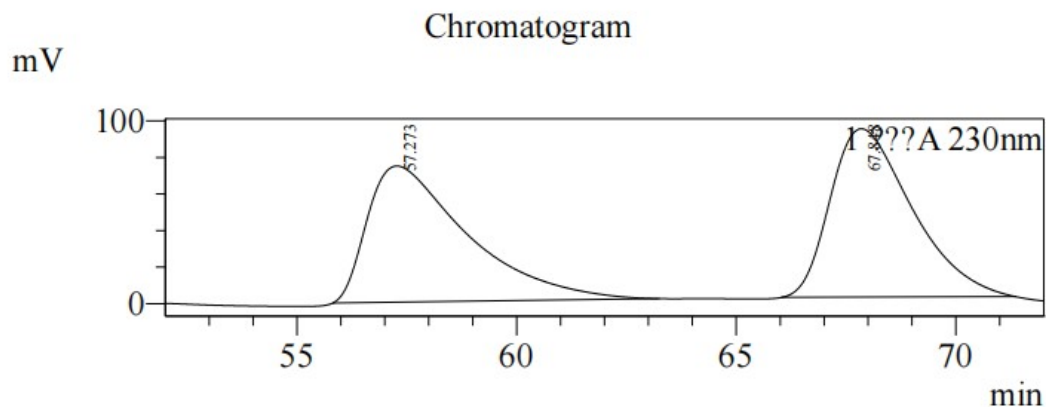

Peak Table

???A 230nm

| Peak# | Ret. Time | Area     | Height | Area%   |
|-------|-----------|----------|--------|---------|
| 1     | 57.273    | 11733615 | 74393  | 49.669  |
| 2     | 67.848    | 11889943 | 91996  | 50.331  |
| Total |           | 23623558 | 166389 | 100.000 |

### Enantiomeric Sample of 3ne

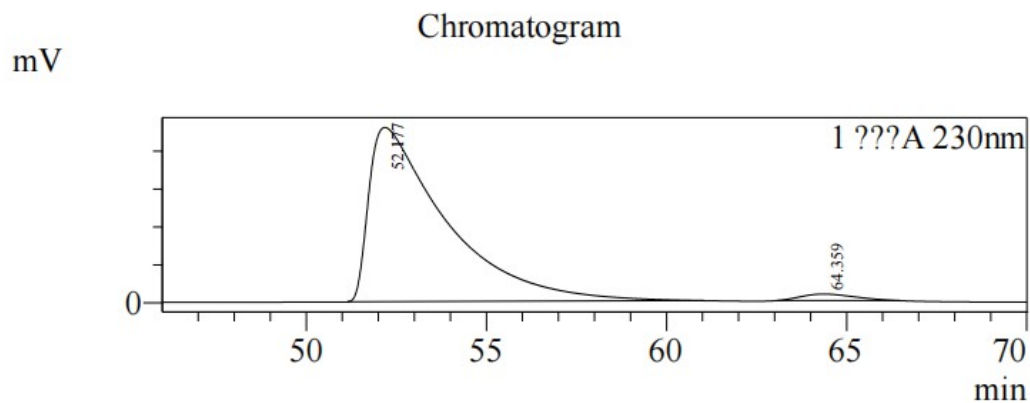

Peak Table

???A 230nm

| Peak# | Ret. Time | Area      | Height | Area%   |
|-------|-----------|-----------|--------|---------|
| 1     | 52.177    | 137329473 | 920716 | 97.486  |
| 2     | 64.359    | 3540876   | 34149  | 2.514   |
| Total |           | 140870349 | 954865 | 100.000 |

**(S)-2-(2-(benzo[d][1,3]dioxol-5-yl)-3-oxoindolin-2-yl)acrylaldehyde (3oe)**

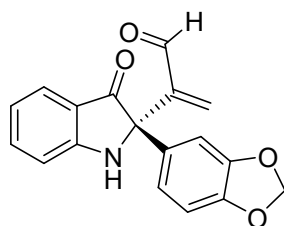

**3oe**

Compound **3oe** (26.4 mg, 86% yield) was obtained as a yellow solid following the *general procedure III* from **1o** (0.1 mmol, 25.1 mg) and **2e** (0.15 mmol, 8.4 mg, 10  $\mu$ L) stirred for 6 hours.

$^1\text{H NMR}$  (400 MHz,  $\text{CDCl}_3$ )  $\delta$  9.55 (s, 1H), 7.58 (d,  $J = 8.0$  Hz, 1H), 7.49 (t,  $J = 7.6$  Hz, 1H), 6.92-6.87 (m, 4H), 6.81 (t,  $J = 7.2$  Hz, 1H), 6.74 (d,  $J = 7.2$  Hz, 1H), 6.37 (s, 1H), 6.11 (brs, 1H), 5.91 (s, 2H);  $^{13}\text{C NMR}$  (100 MHz,  $\text{CDCl}_3$ )  $\delta$  197.9, 194.5, 159.6, 148.0, 147.4, 145.9, 138.0, 137.2, 130.7, 125.5, 119.0, 118.8, 118.1, 111.7, 108.3, 106.2, 101.2, 70.7; **HRMS** Calcd. for  $\text{C}_{18}\text{H}_{14}\text{NO}_4^+ [\text{M}+\text{H}]^+$ : 308.0917, found: 308.0909; **M.p.**: 147-149  $^\circ\text{C}$ .

$[\alpha]_D^{20} = -812.5$  (c 0.04,  $\text{CH}_2\text{Cl}_2$ ) for 94% ee; Enantiomeric excess was determined by HPLC with a Chiralcel OD-H column, Hexane/*i*PrOH = 90/10, 0.5 mL/min, 230 nm,  $t_{\text{minor}} = 66.796$  min,  $t_{\text{major}} = 72.289$  min.

**Racemic Sample of 3oe**

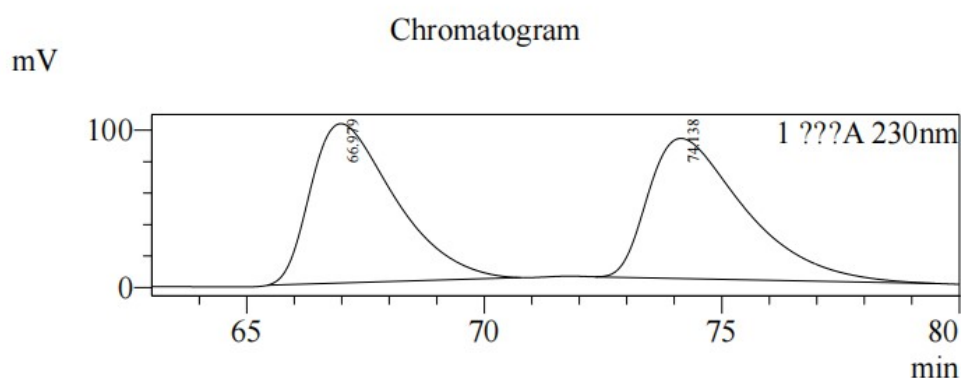

Peak Table

| Peak# | Ret. Time | Area     | Height | Area%   |
|-------|-----------|----------|--------|---------|
| 1     | 66.979    | 12483628 | 101163 | 49.771  |
| 2     | 74.138    | 12598719 | 88995  | 50.229  |
| Total |           | 25082347 | 190158 | 100.000 |

## Enantiomeric Sample of 3oe

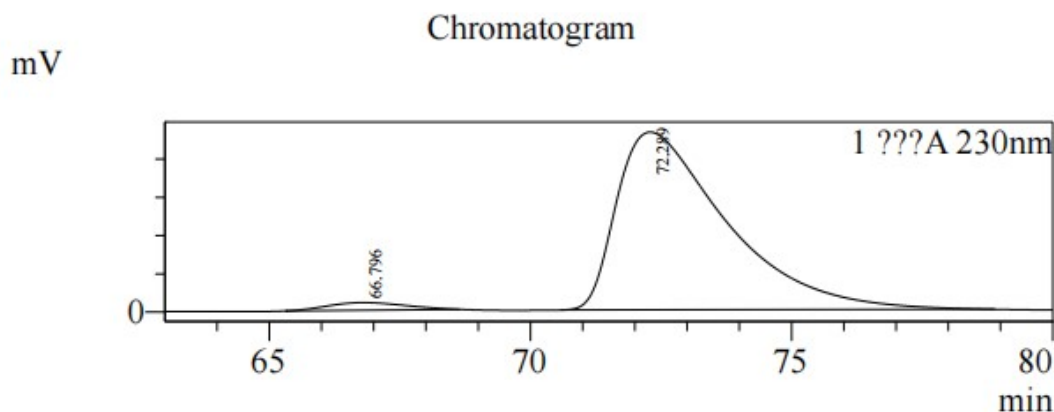

Peak Table

???A 230nm

| Peak# | Ret. Time | Area     | Height | Area%   |
|-------|-----------|----------|--------|---------|
| 1     | 66.796    | 1021862  | 9909   | 2.918   |
| 2     | 72.289    | 33991635 | 232437 | 97.082  |
| Total |           | 35013496 | 242347 | 100.000 |

## (S)-2-(3-oxobut-1-en-2-yl)-2-(1-tosyl-1H-indol-3-yl)indolin-3-one (3pe)

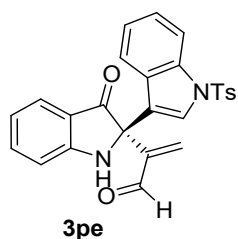

Compound **3pe** (19.2 mg, 42% yield) was obtained as a yellow solid following the *general procedure III* from **1p** (0.1 mmol, 40 mg) and **2e** (0.15 mmol, 8.4 mg, 10  $\mu$ L) stirred for 8 hours.

$^1\text{H NMR}$  (400 MHz,  $\text{CDCl}_3$ )  $\delta$  9.60 (s, 1H), 7.88 (d,  $J = 8.4$  Hz, 1H), 7.69 (d,  $J = 8.4$  Hz, 2H), 7.63 (d,  $J = 8.0$  Hz, 1H), 7.56 (s, 1H), 7.55-7.48 (m, 2H), 7.25-7.23 (m, 1H), 7.21 (s, 1H), 7.19 (s, 1H), 7.15-7.11 (m, 1H), 6.92 (d,  $J = 8.4$  Hz, 1H), 6.87 (t,  $J = 8.0$  Hz, 1H), 6.78 (s, 1H), 6.42 (s, 1H), 5.99 (brs, 1H), 2.33 (s, 3H);  $^{13}\text{C NMR}$  (100 MHz,  $\text{CDCl}_3$ )  $\delta$  197.7, 193.7, 159.6, 145.1, 144.9, 138.1, 137.9, 135.7, 134.7, 129.9, 127.8, 126.8, 125.4, 125.1, 124.9, 123.3, 121.4, 119.44, 119.36, 119.0, 113.7, 112.2, 67.9, 21.6; **M.p.**: 123-125  $^\circ\text{C}$ ; **HRMS** Calcd. for  $\text{C}_{26}\text{H}_{21}\text{N}_2\text{O}_4\text{S}^+$   $[\text{M}+\text{H}]^+$ : 457.1228, found: 457.1224.

$[\alpha]_D^{20} = -362.5$  (c 0.04,  $\text{CH}_2\text{Cl}_2$ ) for 88% ee; Enantiomeric excess was determined by HPLC with a Chiralcel IF-H column, Hexane/PrOH = 80/20, 0.5 mL/min, 230 nm,  $t_{\text{minor}} = 58.202$  min,  $t_{\text{major}} = 70.844$  min.

### Racemic Sample of 3pe

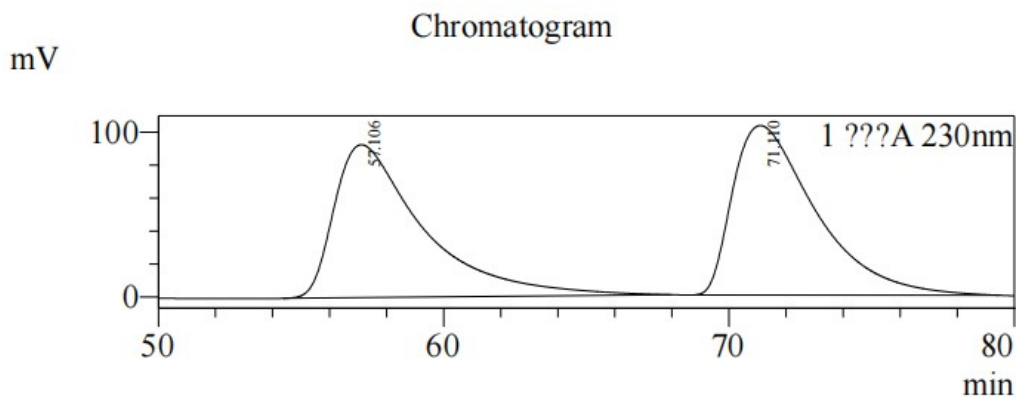

Peak Table

???A 230nm

| Peak# | Ret. Time | Area     | Height | Area%   |
|-------|-----------|----------|--------|---------|
| 1     | 57.106    | 20071371 | 92700  | 49.062  |
| 2     | 71.110    | 20838545 | 102798 | 50.938  |
| Total |           | 40909916 | 195498 | 100.000 |

### Enantiomeric Sample of 3pe

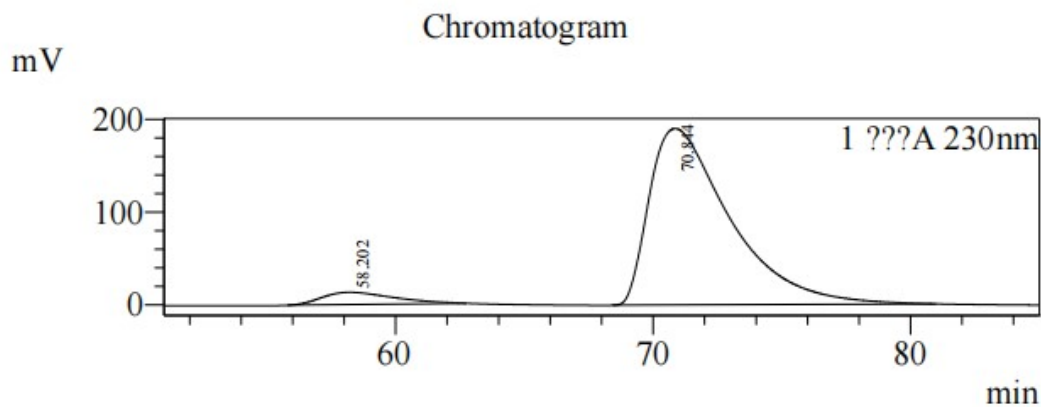

Peak Table

???A 230nm

| Peak# | Ret. Time | Area     | Height | Area%   |
|-------|-----------|----------|--------|---------|
| 1     | 58.202    | 2540345  | 13211  | 5.778   |
| 2     | 70.844    | 41423853 | 189985 | 94.222  |
| Total |           | 43964199 | 203196 | 100.000 |

**(S)-2-(5-bromo-3-oxo-2-phenylindolin-2-yl)acrylaldehyde (3qe)**

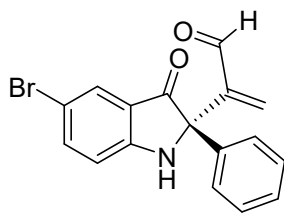

### 3qe

Compound **3qe** (30.7 mg, 90% yield) was obtained as a yellow solid following the *general procedure III* from **1q** (0.1 mmol, 28.4 mg) and **2e** (0.15 mmol, 8.4 mg, 10  $\mu$ L) stirred for 6 hours.

$^1\text{H NMR}$  (400 MHz,  $\text{CDCl}_3$ )  $\delta$  9.54 (s, 1H), 7.68 (s, 1H), 7.55 (d,  $J = 8.8$  Hz, 1H), 7.41 (d,  $J = 7.2$  Hz, 2H), 7.34-7.27 (m, 3H), 6.88 (s, 1H), 6.84 (d,  $J = 8.8$  Hz, 1H), 6.41 (s, 1H), 6.20 (brs, 1H);  $^{13}\text{C NMR}$  (100 MHz,  $\text{CDCl}_3$ )  $\delta$  196.6, 194.2, 158.2, 145.7, 140.4, 137.3, 136.3, 128.8, 128.1, 127.9, 125.3, 119.8, 113.3, 111.0, 71.6; **HRMS** Calcd. for  $\text{C}_{17}\text{H}_{13}\text{NO}_2\text{Br}^+ [\text{M}+\text{H}]^+$ : 342.0124, found: 342.0123; **M.p.**: 179-181  $^\circ\text{C}$ .

$[\alpha]_D^{20} = -576.0$  (c 0.05,  $\text{CH}_2\text{Cl}_2$ ) for 92% ee; Enantiomeric excess was determined by HPLC with a Chiralcel OD-H column, Hexane/*i*PrOH = 90/10, 0.5 mL/min, 230 nm,  $t_{\text{minor}} = 38.327$  min,  $t_{\text{major}} = 41.696$  min.

### Racemic Sample of 3qe

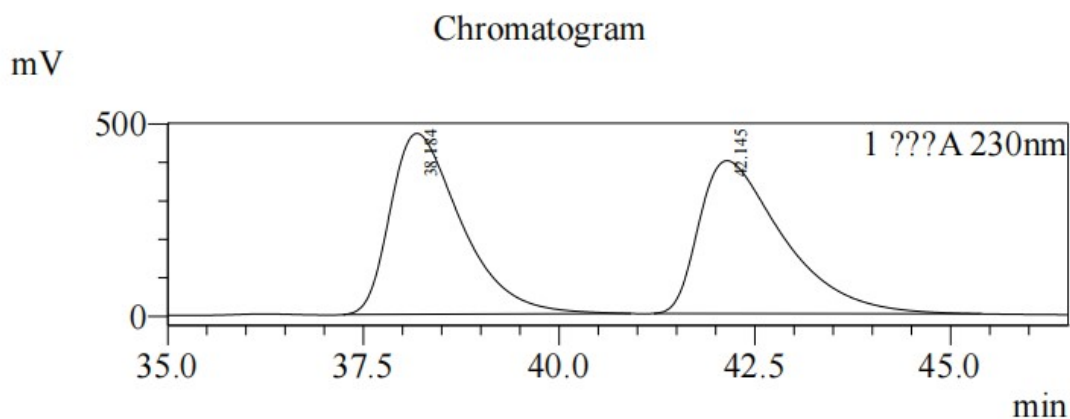

Peak Table

???A 230nm

| Peak# | Ret. Time | Area     | Height | Area%   |
|-------|-----------|----------|--------|---------|
| 1     | 38.184    | 29664294 | 470192 | 49.931  |
| 2     | 42.145    | 29746868 | 397140 | 50.069  |
| Total |           | 59411162 | 867332 | 100.000 |

### Enantiomeric Sample of 3qe

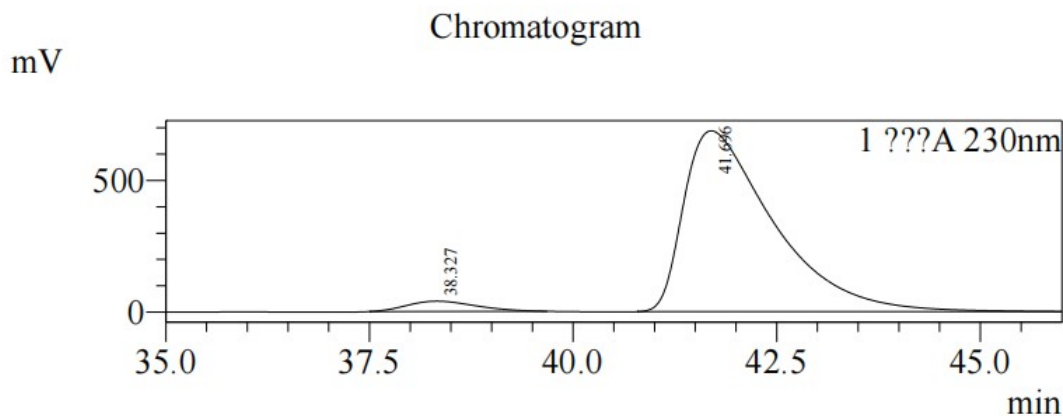

Peak Table

???A 230nm

| Peak# | Ret. Time | Area     | Height | Area%   |
|-------|-----------|----------|--------|---------|
| 1     | 38.327    | 2294397  | 39078  | 4.172   |
| 2     | 41.696    | 52696875 | 686925 | 95.828  |
| Total |           | 54991273 | 726003 | 100.000 |

**(S)-2-(4-chloro-3-oxo-2-phenylindolin-2-yl)acrylaldehyde (3re)**

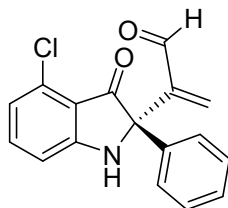

**3re**

Compound **3re** (18.8 mg, 63% yield) was obtained as a yellow solid following the *general procedure III* from **1r** (0.1 mmol, 24.1 mg) and **2e** (0.15 mmol, 8.4 mg, 10  $\mu$ L) stirred for 6 hours.

$^1\text{H NMR}$  (400 MHz,  $\text{CDCl}_3$ )  $\delta$  9.52 (s, 1H), 7.44 (d,  $J = 7.2$  Hz, 2H), 7.38-7.27 (m, 4H), 6.98 (s, 1H), 6.80 (d,  $J = 8.0$  Hz, 1H), 6.73 (d,  $J = 7.6$  Hz, 1H) 6.42 (s, 1H), 6.31 (brs, 1H);  $^{13}\text{C NMR}$  (100 MHz,  $\text{CDCl}_3$ )  $\delta$  195.0, 194.4, 160.9, 145.7, 138.0, 137.5, 136.5, 133.3, 128.7, 128.1, 125.4, 120.0, 114.8, 109.9, 71.2; **HRMS** Calcd. for  $\text{C}_{17}\text{H}_{13}\text{NO}_2\text{Cl}^+ [\text{M}+\text{H}]^+$ : 298.0629, found: 298.0623; **M.p.**: 118-120  $^\circ\text{C}$ .

$[\alpha]_{\text{D}}^{20} = -1185.0$  (c 0.04,  $\text{CH}_2\text{Cl}_2$ ) for 93% ee; Enantiomeric excess was determined by HPLC with a Chiralcel OD-H column, Hexane/*i*PrOH = 90/10, 0.5 mL/min, 230 nm,  $t_{\text{minor}} = 55.244$  min,  $t_{\text{major}} = 43.204$  min.

**Racemic Sample of 3re**

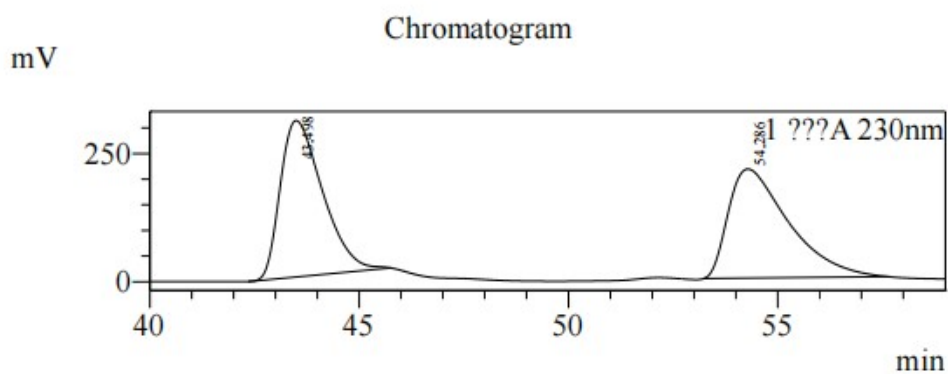

Peak Table

???A 230nm

| Peak# | Ret. Time | Area     | Height | Area%   |
|-------|-----------|----------|--------|---------|
| 1     | 43.498    | 21429594 | 305188 | 50.097  |
| 2     | 54.286    | 21346986 | 212915 | 49.903  |
| Total |           | 42776580 | 518104 | 100.000 |

**Enantiomeric Sample of 3re**

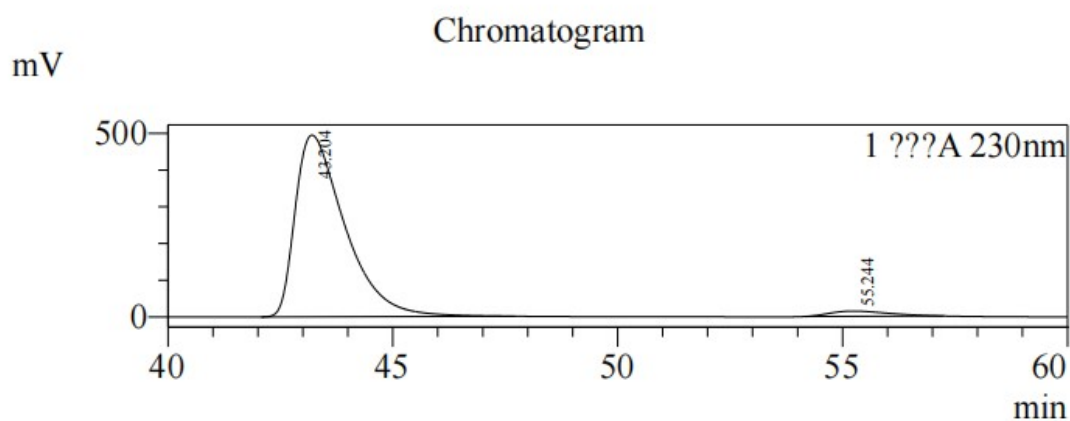

Peak Table

???A 230nm

| Peak# | Ret. Time | Area     | Height | Area%   |
|-------|-----------|----------|--------|---------|
| 1     | 43.204    | 38009900 | 494960 | 96.723  |
| 2     | 55.244    | 1287867  | 14216  | 3.277   |
| Total |           | 39297767 | 509176 | 100.000 |

**(S)-2-(6-fluoro-3-oxo-2-phenylindolin-2-yl)acrylaldehyde (3se)**

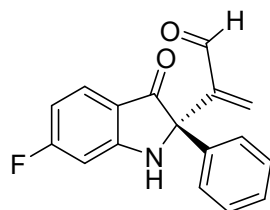

**3se**

Compound **3se** (27.3 mg, 97% yield) was obtained as a yellow solid following the *general procedure III* from **1s** (0.1 mmol, 22.5 mg) and **2e** (0.15 mmol, 8.4 mg, 10  $\mu$ L) stirred for 6 hours.

$^1\text{H NMR}$  (400 MHz,  $\text{CDCl}_3$ )  $\delta$  9.54 (s, 1H), 7.57 (dd,  $J = 8.4, 5.6$  Hz, 1H), 7.43-7.40 (m, 2H), 7.34-7.24 (m, 3H), 6.94 (s, 1H), 6.58-6.49 (m, 2H), 6.41 (s, 1H), 6.33 (brs, 1H);  $^{13}\text{C NMR}$  (100 MHz,  $\text{CDCl}_3$ )  $\delta$  195.9, 194.3, 169.9 (d,  $J = 255.3$  Hz), 161.2 (d,  $J = 14.3$  Hz), 145.8, 137.2, 136.6, 128.7, 128.1, 127.9 (d,  $J = 12.6$  Hz), 125.3, 114.8 (d,  $J = 0.9$  Hz), 107.9 (d,  $J = 24.8$  Hz), 98.0 (d,  $J = 26.0$  Hz), 71.6;  $^{19}\text{F NMR}$  (376 MHz,  $\text{CDCl}_3$ )  $\delta$  -98.1 (s); **M.p.:** 125-127  $^\circ\text{C}$ ; **HRMS** Calcd. for  $\text{C}_{17}\text{H}_{11}\text{FNO}_2^-$  [M-H] $^-$ : 280.0774, found: 280.0783.

$[\alpha]_D^{20} = -692.8$  (c 0.91,  $\text{CH}_2\text{Cl}_2$ ) for 90% ee; Enantiomeric excess was determined by HPLC with a Chiralcel OD-H column, Hexane/ $i$ PrOH = 90/10, 0.5 mL/min, 230 nm,  $t_{\text{minor}} = 31.656$  min,  $t_{\text{major}} = 40.417$  min.

### Racemic Sample of 3se

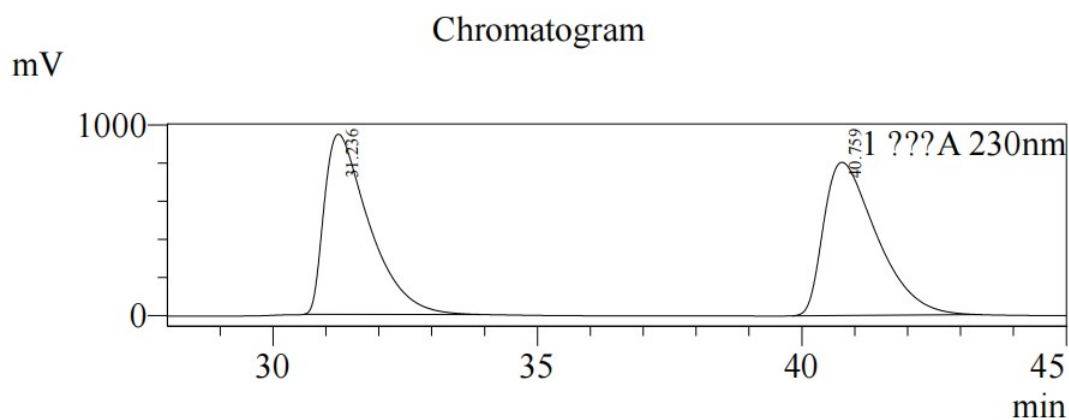

Peak Table

???A 230nm

| Peak# | Ret. Time | Area      | Height  | Area%   |
|-------|-----------|-----------|---------|---------|
| 1     | 31.236    | 55772458  | 944060  | 49.837  |
| 2     | 40.759    | 56138381  | 802853  | 50.163  |
| Total |           | 111910839 | 1746913 | 100.000 |

### Enantiomeric Sample of 3se



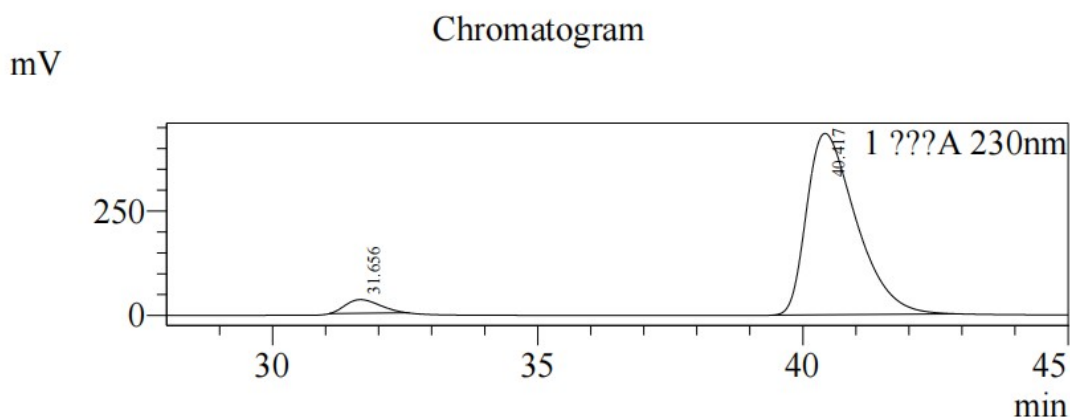

Peak Table

???A 230nm

| Peak# | Ret. Time | Area     | Height | Area%   |
|-------|-----------|----------|--------|---------|
| 1     | 31.656    | 1484609  | 32833  | 5.002   |
| 2     | 40.417    | 28198455 | 434473 | 94.998  |
| Total |           | 29683064 | 467306 | 100.000 |

**(S)-2-(5-methoxy-3-oxo-2-phenylindolin-2-yl)acrylaldehyde (3te)**

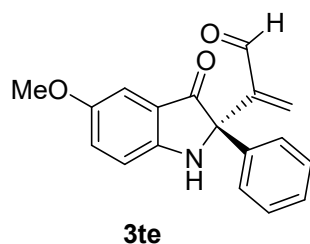

Compound **3te** (19.7 mg, 67% yield) was obtained as a yellow solid following the *general procedure III* from **1t** (0.1 mmol, 23.7 mg) and **2e** (0.15 mmol, 8.4 mg, 10  $\mu$ L) stirred for 6 hours.

$^1\text{H NMR}$  (400 MHz,  $\text{CDCl}_3$ )  $\delta$  9.55 (s, 1H), 7.44 (d,  $J = 8.4$  Hz, 2H), 7.33-7.24 (m, 3H), 7.20-7.17 (m, 1H), 7.00 (s, 1H), 6.91-6.88 (m, 2H), 6.39 (s, 1H), 5.88 (brs, 1H), 3.75 (s, 3H);  $^{13}\text{C NMR}$  (100 MHz,  $\text{CDCl}_3$ )  $\delta$  198.2, 194.3, 155.7, 153.4, 146.3, 137.1, 137.0, 128.7, 127.9, 125.4, 118.3, 113.3, 105.0, 72.0, 55.7; **HRMS** Calcd. for  $\text{C}_{18}\text{H}_{16}\text{NO}_3^+ [\text{M}+\text{H}]^+$ : 294.1125, found: 294.1117; **M.p.**: 169-170  $^\circ\text{C}$ .

$[\alpha]_{\text{D}}^{20} = -940.0$  (c 0.04,  $\text{CH}_2\text{Cl}_2$ ) for 85% ee; Enantiomeric excess was determined by HPLC with a Chiralcel OD-H column, Hexane/ $i$ PrOH = 95/5, 0.5 mL/min, 230 nm,  $t_{\text{minor}} = 78.973$  min,  $t_{\text{major}} = 82.414$  min.

**Racemic Sample of 3te**

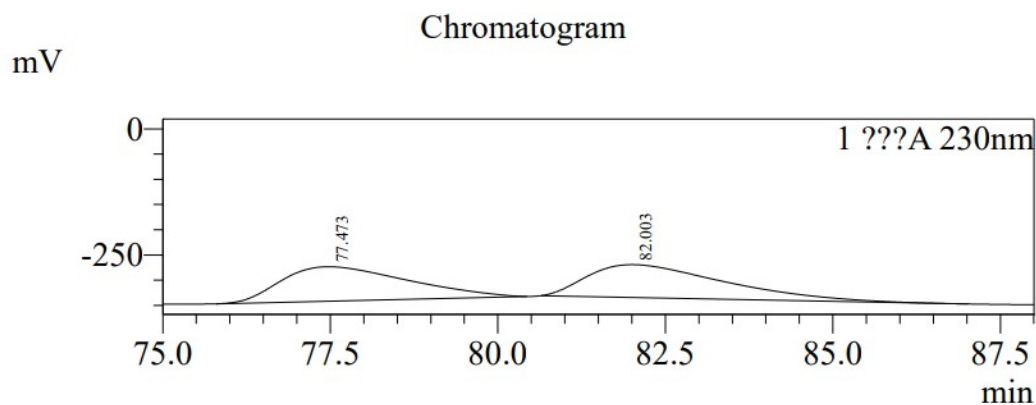

Peak Table

???A 230nm

| Peak# | Ret. Time | Area     | Height | Area%   |
|-------|-----------|----------|--------|---------|
| 1     | 77.473    | 8935858  | 68207  | 49.053  |
| 2     | 82.003    | 9280727  | 64949  | 50.947  |
| Total |           | 18216585 | 133156 | 100.000 |

**Enantiomeric Sample of 3te**

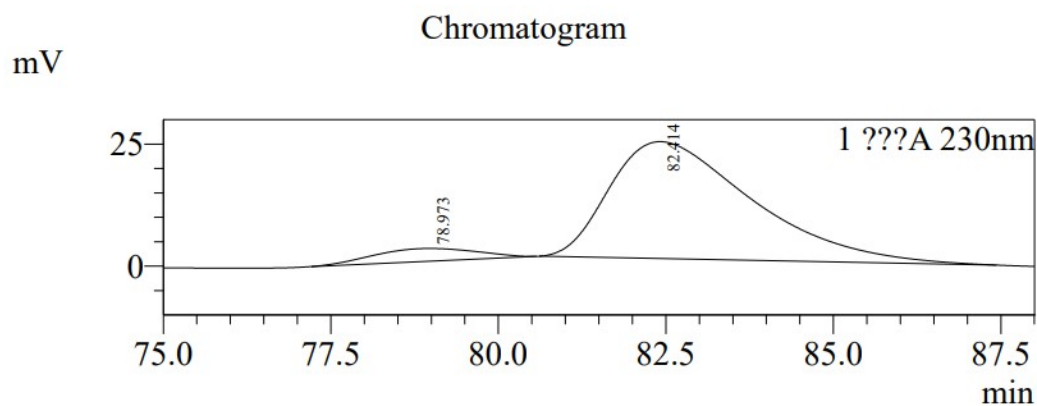

Peak Table

???A 230nm

| Peak# | Ret. Time | Area    | Height | Area%   |
|-------|-----------|---------|--------|---------|
| 1     | 78.973    | 282591  | 2606   | 7.376   |
| 2     | 82.414    | 3548487 | 23950  | 92.624  |
| Total |           | 3831078 | 26556  | 100.000 |

**(S)-2-(6-methyl-3-oxo-2-phenylindolin-2-yl)acrylaldehyde (3ue)**

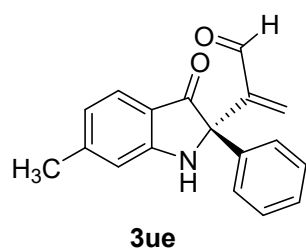

Compound **3ue** (21.0 mg, 76% yield) was obtained as a yellow solid following the *general procedure III* from **1u** (0.1 mmol, 22.1 mg) and **2e** (0.15 mmol, 8.4 mg, 10  $\mu$ L) stirred for 6 hours.

$^1\text{H NMR}$  (400 MHz,  $\text{CDCl}_3$ )  $\delta$  9.54 (s, 1H), 7.45 (dd,  $J = 17.2, 8.0$  Hz, 3H), 7.32-7.23 (m, 3H), 6.93 (s, 1H), 6.73 (s, 1H), 6.64 (d,  $J = 8.0$  Hz, 1H), 6.38 (s, 1H), 6.10 (brs, 1H), 2.37 (s, 3H);  $^{13}\text{C NMR}$  (100 MHz,  $\text{CDCl}_3$ )  $\delta$  197.1, 194.5, 160.2, 149.8, 146.1, 137.13, 137.10, 128.6, 127.8, 125.3, 125.2, 120.9, 115.9, 111.7, 71.2, 22.5; **HRMS** Calcd. for  $\text{C}_{18}\text{H}_{16}\text{NO}_2^+$   $[\text{M}+\text{H}]^+$ : 278.1176, found: 278.1167; **M.p.**: 141-143  $^\circ\text{C}$ .

$[\alpha]_{\text{D}}^{20} = -1070.0$  (c 0.05,  $\text{CH}_2\text{Cl}_2$ ) for 92% ee; Enantiomeric excess was determined by HPLC with a Chiralcel IF-H column, Hexane/ $i$ PrOH = 95/5, 0.5 mL/min, 230 nm,  $t_{\text{minor}} = 35.014$  min,  $t_{\text{major}} = 48.313$  min.

### Racemic Sample of 3ue

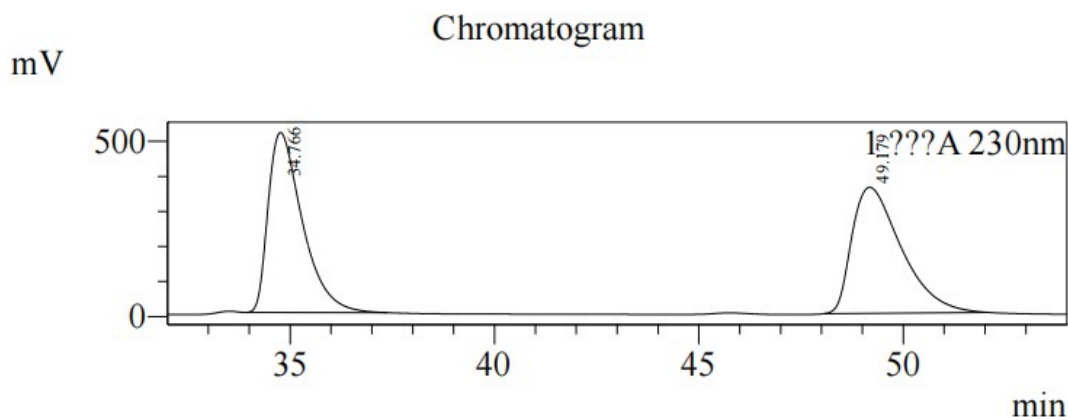

Peak Table

1??A 230nm

| Peak# | Ret. Time | Area     | Height | Area%   |
|-------|-----------|----------|--------|---------|
| 1     | 34.766    | 29983951 | 513831 | 49.745  |
| 2     | 49.179    | 30291608 | 359694 | 50.255  |
| Total |           | 60275559 | 873525 | 100.000 |

### Enantiomeric Sample of 3ue

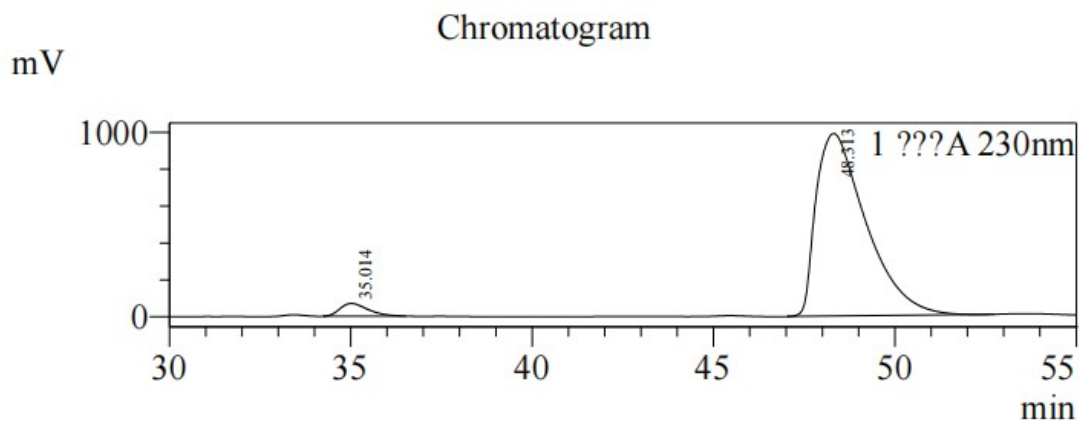

Peak Table

???A 230nm

| Peak# | Ret. Time | Area     | Height  | Area%   |
|-------|-----------|----------|---------|---------|
| 1     | 35.014    | 3724088  | 69098   | 3.778   |
| 2     | 48.313    | 94840643 | 990739  | 96.222  |
| Total |           | 98564732 | 1059837 | 100.000 |

**(S)-2-(5-methyl-3-oxo-2-phenylindolin-2-yl)acrylaldehyde (3ve)**

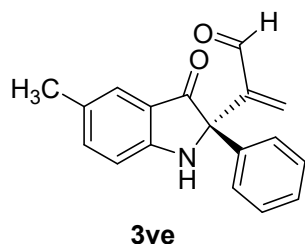

Compound **3ve** (24.5 mg, 88% yield) was obtained as a yellow solid following the *general procedure III* from **1v** (0.1 mmol, 22.1 mg) and **2e** (0.15 mmol, 8.4 mg, 10  $\mu$ L) stirred for 6 hours.

$^1\text{H NMR}$  (400 MHz,  $\text{CDCl}_3$ )  $\delta$  9.54 (s, 1H), 7.43 (d,  $J = 7.6$  Hz, 2H), 7.37 (s, 1H), 7.34-7.28 (m, 3H), 7.25-7.23 (m, 1H), 6.89 (s, 1H), 6.86 (d,  $J = 8.4$  Hz, 1H), 6.37 (s, 1H), 5.98 (brs, 1H), 2.28 (s, 3H);  $^{13}\text{C NMR}$  (100 MHz,  $\text{CDCl}_3$ )  $\delta$  198.0, 194.3, 158.3, 146.3, 139.4, 137.2, 136.9, 128.6, 127.8, 125.5, 124.8, 118.4, 111.7, 71.4, 20.5; **M.p.**: 141-143  $^\circ\text{C}$ ; **HRMS** Calcd. for  $\text{C}_{18}\text{H}_{16}\text{NO}_2^+$   $[\text{M}+\text{H}]^+$ : 278.1176, found: 278.1174.

$[\alpha]_D^{20} = -1461.0$  (c 0.05,  $\text{CH}_2\text{Cl}_2$ ) for 95% ee; Enantiomeric excess was determined by HPLC with a Chiralcel IF-H column, Hexane/ $i$ PrOH = 90/10, 0.5 mL/min, 230 nm,  $t_{\text{minor}} = 33.131$  min,  $t_{\text{major}} = 29.494$  min.

### Racemic Sample of 3ve

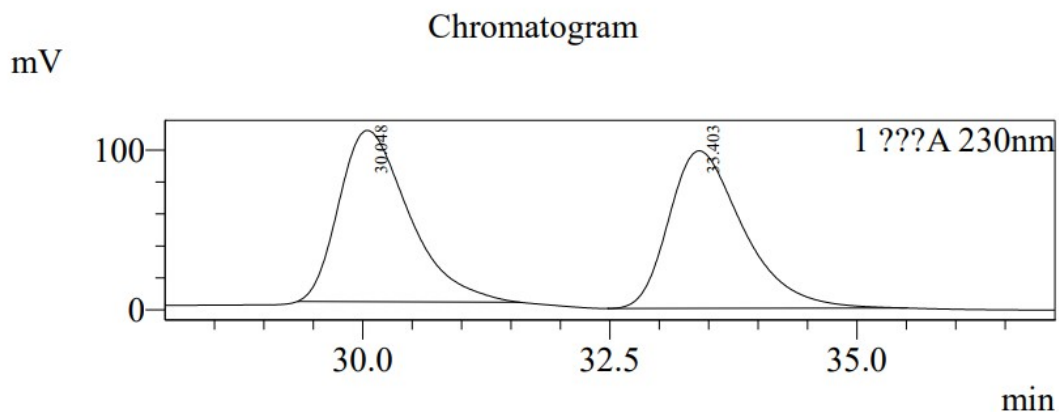

Peak Table

???A 230nm

| Peak# | Ret. Time | Area     | Height | Area%   |
|-------|-----------|----------|--------|---------|
| 1     | 30.048    | 5299058  | 107213 | 50.556  |
| 2     | 33.403    | 5182471  | 98645  | 49.444  |
| Total |           | 10481529 | 205858 | 100.000 |

### Enantiomeric Sample of 3ve

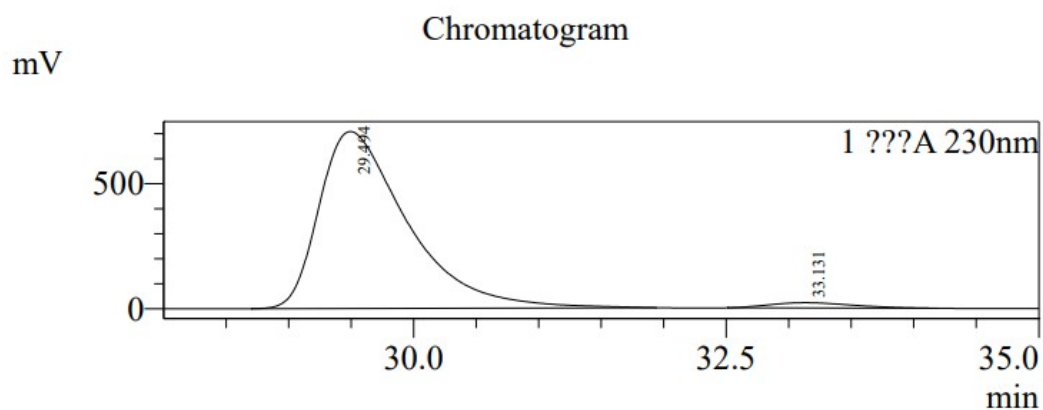

Peak Table

???A 230nm

| Peak# | Ret. Time | Area     | Height | Area%   |
|-------|-----------|----------|--------|---------|
| 1     | 29.494    | 34655083 | 707790 | 97.255  |
| 2     | 33.131    | 977992   | 21158  | 2.745   |
| Total |           | 35633074 | 728948 | 100.000 |

**(S)-2-(6-methyl-2-(naphthalen-2-yl)-3-oxindolin-2-yl)acrylaldehyde (3we)**

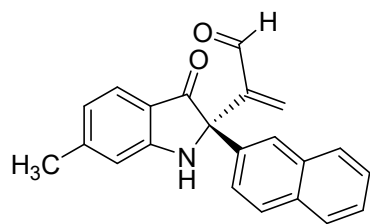

### 3we

Compound **3we** (15.0 mg, 46% yield) was obtained as a yellow solid following the *general procedure III* from **1w** (0.1 mmol, 27.1 mg) and **2e** (0.15 mmol, 8.4 mg, 10  $\mu$ L) stirred for 6 hours.

$^1\text{H NMR}$  (400 MHz,  $\text{CDCl}_3$ )  $\delta$  9.58 (s, 1H), 7.89 (s, 1H), 7.79 (d,  $J = 8.0$  Hz, 3H), 7.55-7.42 (m, 4H), 6.99 (s, 1H), 6.79 (s, 1H), 6.66 (d,  $J = 8.0$  Hz, 1H), 6.45 (s, 1H), 6.19 (brs, 1H), 2.40 (s, 3H);  $^{13}\text{C NMR}$  (100 MHz,  $\text{CDCl}_3$ )  $\delta$  197.1, 194.5, 160.3, 149.9, 146.1, 137.4, 134.6, 133.2, 132.9, 128.5, 128.1, 127.5, 126.11, 126.08, 125.3, 124.5, 123.3, 121.0, 116.1, 111.8, 71.3, 22.6; **HRMS** Calcd. for  $\text{C}_{22}\text{H}_{18}\text{NO}_2^+$   $[\text{M}+\text{H}]^+$ : 328.1332, found: 328.1326; **M.p.**: 75-77  $^\circ\text{C}$ .

$[\alpha]_{\text{D}}^{20} = -836.0$  (c 0.05,  $\text{CH}_2\text{Cl}_2$ ) for 94% ee; Enantiomeric excess was determined by HPLC with a Chiralcel OD-H column, Hexane/ $i$ PrOH = 90/10, 0.5 mL/min, 230 nm,  $t_{\text{minor}} = 57.515$  min,  $t_{\text{major}} = 50.001$  min.

### Racemic Sample of 3we

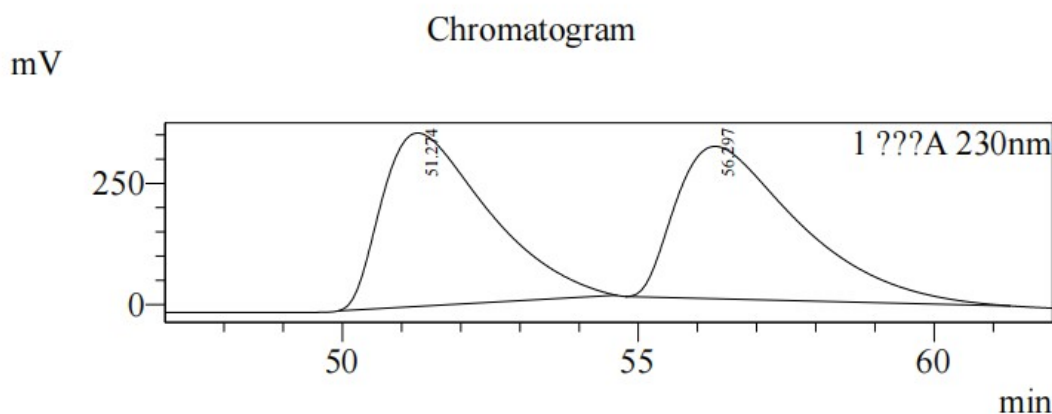

Peak Table

???A 230nm

| Peak# | Ret. Time | Area     | Height | Area%   |
|-------|-----------|----------|--------|---------|
| 1     | 51.274    | 44619768 | 357370 | 49.521  |
| 2     | 56.297    | 45483131 | 313900 | 50.479  |
| Total |           | 90102899 | 671269 | 100.000 |

### Enantiomeric Sample of 3we

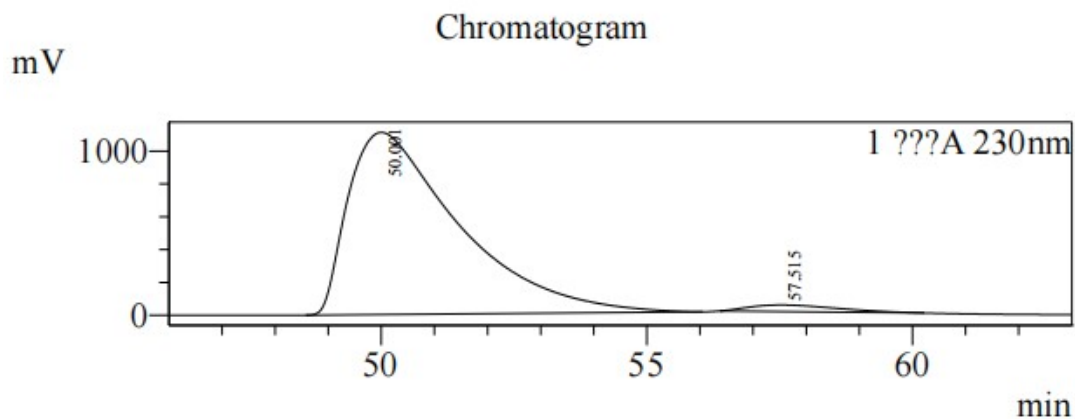

Peak Table

???A 230nm

| Peak# | Ret. Time | Area      | Height  | Area%   |
|-------|-----------|-----------|---------|---------|
| 1     | 50.001    | 160886728 | 1110298 | 97.194  |
| 2     | 57.515    | 4644033   | 40297   | 2.806   |
| Total |           | 165530761 | 1150594 | 100.000 |

**(S)-4-(5-bromo-3-oxo-2-(3-oxoprop-1-en-2-yl)indolin-2-yl)benzotrile (3xe)**

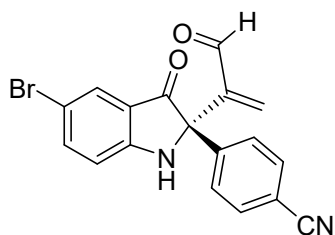

**3xe**

Compound **3xe** (26.1 mg, 71% yield) was obtained as a yellow solid following the *general procedure III* from **1x** (0.1 mmol, 30.9 mg) and **2e** (0.15 mmol, 8.4 mg, 10  $\mu$ L) stirred for 6 hours.

$^1\text{H NMR}$  (400 MHz,  $\text{CDCl}_3$ )  $\delta$  9.52 (s, 1H), 7.69 (s, 1H), 7.59 (dd,  $J = 18.8, 8.8$  Hz, 5H), 6.88 (t,  $J = 4.8$  Hz, 2H), 6.47 (s, 1H), 6.17 (s, 1H);  $^{13}\text{C NMR}$  (100 MHz,  $\text{CDCl}_3$ )  $\delta$  195.3, 194.0, 158.2, 145.1, 141.8, 140.9, 137.9, 132.4, 128.0, 126.4, 119.5, 118.5, 113.7, 112.0, 111.7, 71.4; **M.p.:** 88-90  $^\circ\text{C}$ ; **HRMS** Calcd. for  $\text{C}_{18}\text{H}_{10}\text{N}_2\text{O}_2\text{Br}^-$  [M-H] $^-$ : 364.9931, found: 364.9938.

$[\alpha]_D^{20} = -652.5$  (c 0.04,  $\text{CH}_2\text{Cl}_2$ ) for 78% ee; Enantiomeric excess was determined by HPLC with a Chiralcel IF-H column, Hexane/ $i$ PrOH = 80/20, 0.5 mL/min, 230 nm,  $t_{\text{minor}} = 34.686$  min,  $t_{\text{major}} = 28.998$  min.

**Racemic Sample of 3xe**

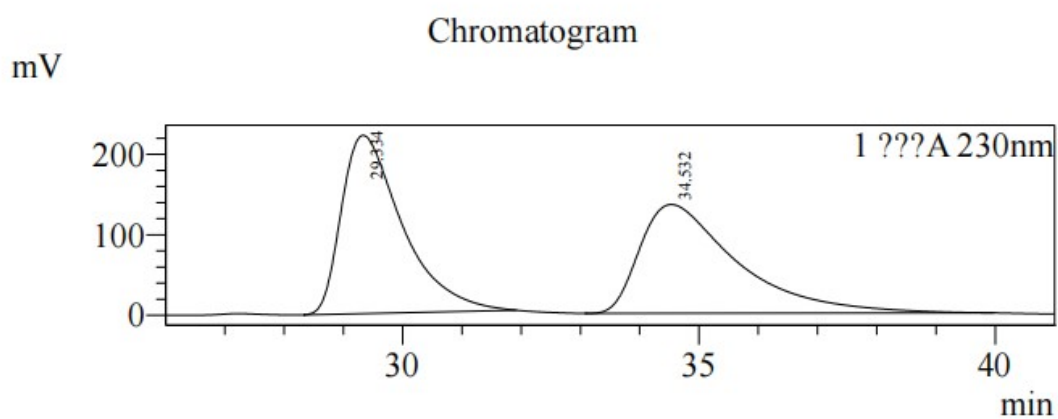

Peak Table

???A 230nm

| Peak# | Ret. Time | Area     | Height | Area%   |
|-------|-----------|----------|--------|---------|
| 1     | 29.334    | 15777285 | 221386 | 50.496  |
| 2     | 34.532    | 15467267 | 135228 | 49.504  |
| Total |           | 31244552 | 356614 | 100.000 |

**Enantiomeric Sample of 3xe**

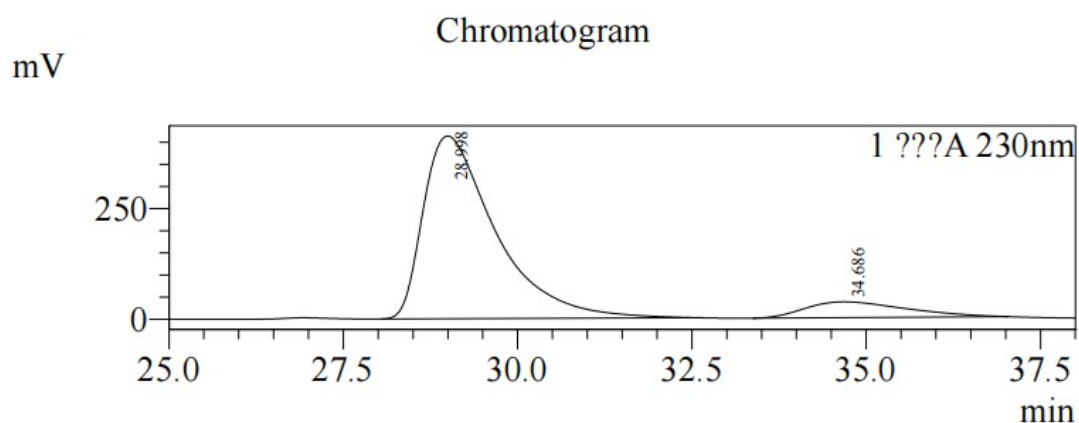

Peak Table

???A 230nm

| Peak# | Ret. Time | Area     | Height | Area%   |
|-------|-----------|----------|--------|---------|
| 1     | 28.998    | 29823111 | 412678 | 89.231  |
| 2     | 34.686    | 3599423  | 35718  | 10.769  |
| Total |           | 33422534 | 448396 | 100.000 |

**(R)-2-(3-oxo-2-phenylindolin-2-yl)acrylaldehyde (3ae')**



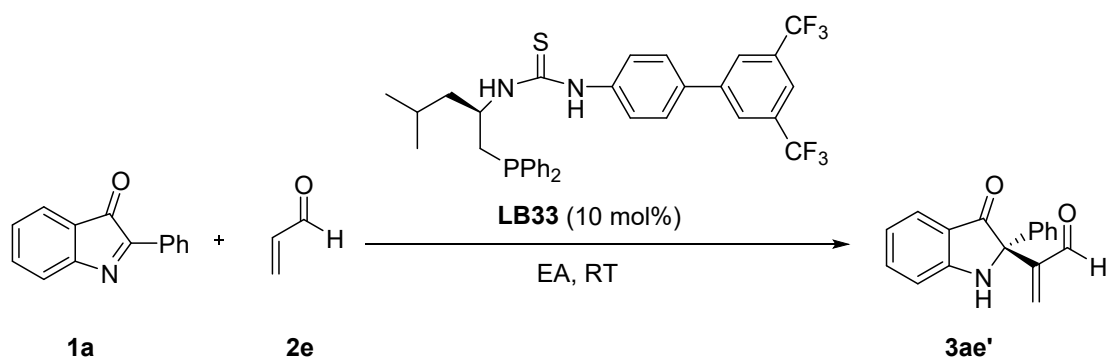

**Procedure (IIIa):** To a solution of compound **1a** (0.1 mmol, 1.0 equiv., 20.7 mg) and chiral phosphine **LB33** (0.01 mmol, 0.1 equiv., 6.3 mg) in ethyl acetate (2.0 mL) was added compound **2e** (0.15 mmol, 1.5 equiv., 10  $\mu$ L) under nitrogen atmosphere at room temperature. TLC monitor until the compound **1a** was consumed after three hours. The reaction mixture was then concentrated on a rotary evaporator under reduce pressure and the residue was subjected to purification by column chromatography (silica gel, PE/EtOAc: 15/1 to 10/1,  $R_f$  = 0.2-0.3) to afford the corresponding product **3ae'**.

Compound **3ae'** (24.7 mg, 94% yield) was obtained as a yellow solid following the *general procedure IIIa* from **1a** (0.1 mmol, 20.7 mg) and **2e** (0.15 mmol, 8.4 mg, 10  $\mu$ L) stirred for 6 hours.

$^1\text{H NMR}$  (400 MHz,  $\text{CDCl}_3$ )  $\delta$  9.54 (s, 1H), 7.58 (d,  $J = 7.6$  Hz, 1H), 7.51-7.42 (m, 3H), 7.31-7.24 (m, 3H), 6.93-6.91 (m, 2H), 6.81 (t,  $J = 7.2$  Hz, 1H), 6.40 (s, 1H), 6.17 (brs, 1H);  $^{13}\text{C NMR}$  (100 MHz,  $\text{CDCl}_3$ )  $\delta$  197.9, 194.4, 159.8, 146.0, 137.9, 137.1, 136.9, 128.6, 127.9, 125.5, 125.4, 119.0, 118.2, 111.7, 71.0; **M.p.:** 155-157  $^\circ\text{C}$ .

$[\alpha]_D^{20} = +904.0$  (c 0.05,  $\text{CH}_2\text{Cl}_2$ ) for -95% ee; Enantiomeric excess was determined by HPLC with a Chiralcel OD-H column, Hexane/ $i$ PrOH = 90/10, 0.5 mL/min, 230 nm,  $t_{\text{minor}} = 32.868$  min,  $t_{\text{major}} = 37.239$  min.

### **Racemic Sample of 3ae'**

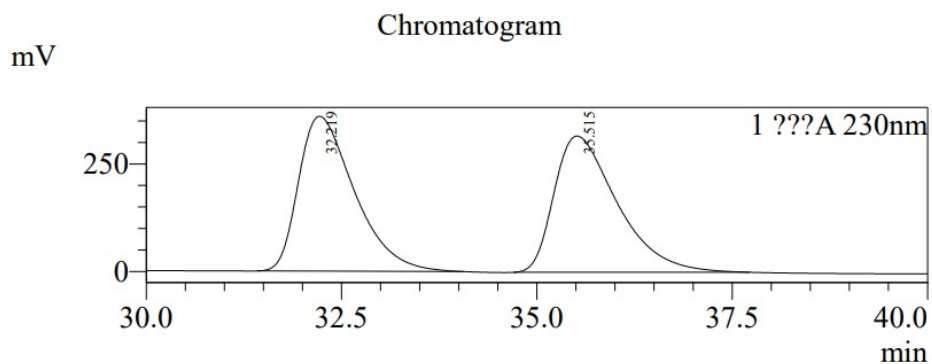

Peak Table

???A 230nm

| Peak# | Ret. Time | Area     | Height | Area%   |
|-------|-----------|----------|--------|---------|
| 1     | 32.219    | 17886753 | 359635 | 50.162  |
| 2     | 35.515    | 17770952 | 316523 | 49.838  |
| Total |           | 35657705 | 676158 | 100.000 |

**Enantiomeric Sample of 3ae'**

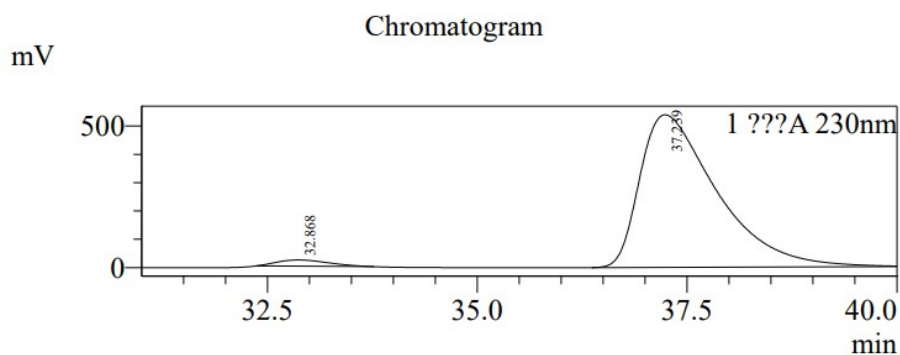

Peak Table

???A 230nm

| Peak# | Ret. Time | Area     | Height | Area%   |
|-------|-----------|----------|--------|---------|
| 1     | 32.868    | 941969   | 21972  | 2.669   |
| 2     | 37.239    | 34354114 | 539141 | 97.331  |
| Total |           | 35296083 | 561113 | 100.000 |

## 4. Synthetic applications

### a) Scale-up experiments for the synthesis of **3aa** and **3ae**

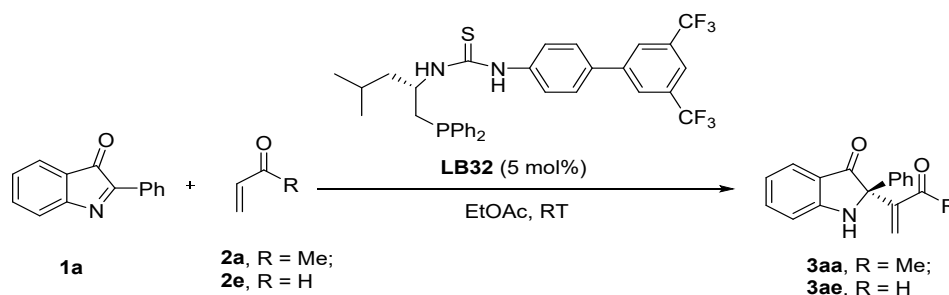

The scale up experiment was followed the general *procedure III*. To a solution of compound **1a** (1.0 mmol for **3aa**, 5.0 mmol for **3ae**, 1.0 equiv.) and chiral phosphine **LB32** (5 mol%) in ethyl acetate was added compound **2a** or **2e** (1.5 equiv.) under nitrogen atmosphere at room temperature. TLC monitor until the compound **1a** consumed after six hours. The reaction mixture was then concentrated on a rotary evaporator under reduce pressure and the residue was subjected to purification by column chromatography (silica gel, PE/EtOAc: 20/1 to 15/1,  $R_f = 0.3$ ) to afford the corresponding product **3aa** (0.21 g, 76% yield, 90% ee) and **3ae** (0.971 g, 74% yield, 94% ee) as yellow solid.

### b) Synthesis of *N*-Boc product **3ae**

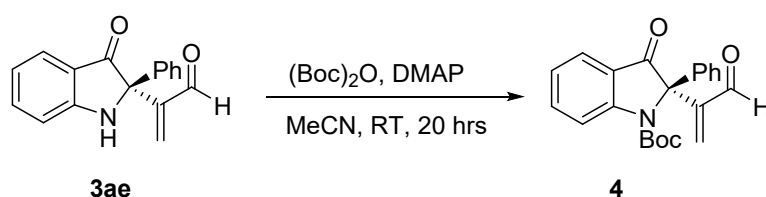

**Procedure (IV):** To a solution of **3ae** (1 mmol, 263 mg) and DMAP (3.3 mmol, 720 mg) in MeCN was added  $(\text{Boc})_2\text{O}$  (2.2 mmol, 489 mg) under nitrogen, then the reaction mixture was stirred at room temperature for 20 hrs. After conversion, the solvent was removed in vacuum and extracted twice with EtOAc and water, the organic layers were dried over anhydrous  $\text{Na}_2\text{SO}_4$  and purified by column chromatography (Petroleum ether/EtOAc: 30/1 to 20/1) to afford the product **4** in 75% yield with 94% ee.

### *tert*-Butyl (*S*)-3-oxo-2-(3-oxoprop-1-en-2-yl)-2-phenylindoline-1-carboxylate (**4**)

Compound **4** (272.9 mg, 75% yield) was obtained as yellow solid following the

*procedure IV* from **3ae** (1 mmol, 263 mg), DMAP (3.3 mmol, 720 mg) and (Boc)<sub>2</sub>O (2.2 mmol, 489 mg) stirred for 20 hrs. <sup>1</sup>H NMR (400 MHz, CDCl<sub>3</sub>) δ 9.56 (s, 1H), 8.27 (s, 1H), 7.67 (d, *J* = 8.0 Hz, 1H), 7.62 (t, *J* = 7.6 Hz, 1H), 7.45 (d, *J* = 7.6 Hz, 2H), 7.36-7.30 (m, 3H), 7.13 (t, *J* = 7.6 Hz, 1H), 6.58 (d, *J* = 17.2 Hz, 2H), 1.44 (s, 9H); <sup>13</sup>C NMR (100 MHz, CDCl<sub>3</sub>) δ 196.0, 191.6, 152.3, 150.7, 149.1, 141.4, 136.6, 133.6, 128.3, 128.2, 127.3, 124.4, 123.4, 122.7, 117.1, 83.0, 74.1, 28.1; HRMS Calcd. for C<sub>22</sub>H<sub>21</sub>NO<sub>4</sub>Na<sup>+</sup> [M+Na]<sup>+</sup>: 386.1368, found: 386.1372; **M.p.**: 49-51 °C.

[α]<sub>D</sub><sup>20</sup> = -103.0 (c 0.10, CH<sub>2</sub>Cl<sub>2</sub>) for 94% ee; Enantiomeric excess was determined by HPLC with a Chiralcel OD-H column, Hexane/*i*PrOH = 90/10, 0.5 mL/min, 230 nm, *t*<sub>minor</sub> = 22.596 min, *t*<sub>major</sub> = 14.894 min.

#### Racemic Sample of 4

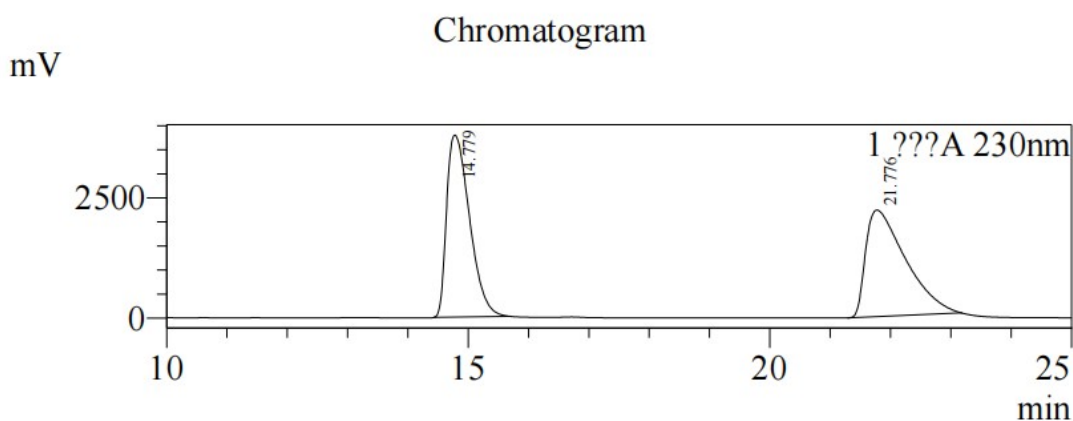

Peak Table

???A 230nm

| Peak# | Ret. Time | Area      | Height  | Area%   |
|-------|-----------|-----------|---------|---------|
| 1     | 14.779    | 99981535  | 3784934 | 49.518  |
| 2     | 21.776    | 101927515 | 2214040 | 50.482  |
| Total |           | 201909050 | 5998974 | 100.000 |

#### Enantiomeric Sample of 4

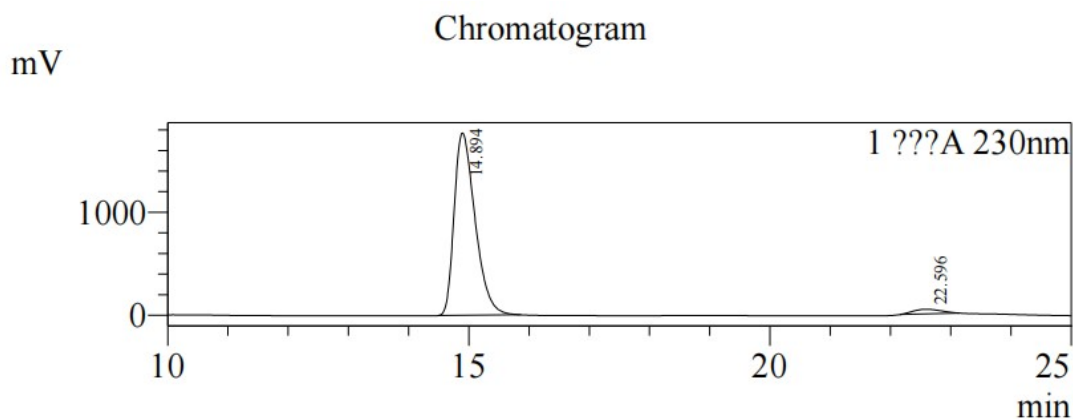

### c) Preparation of compound 5

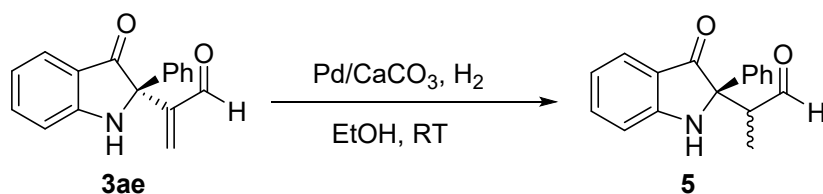

**Procedure (V):** Compound **3ae** was dissolved in ethanol, and then 5% Pd/CaCO<sub>3</sub> was added. The mixture was stirred overnight under a hydrogen balloon at room temperature. Then the mixture was filtered through a Celite pad and the solvent removed in vacuum, the residue obtained was purified by column chromatography (petroleum ether/EtOAc: 20/1 to 15/1) to afford the product **5** in 91% yield with 91% ee/94% ee and 43/57 dr.

**Note:** Compound **5** were inseparable diastereoisomers.

#### 2-((*R*)-3-oxo-2-phenylindolin-2-yl)propanal (**5**)

Compound **5** (48.1 mg, 91% yield, diastereomers, 43:57 dr) were obtained as yellow solid following the *procedure V* from **3ae** (0.2 mmol, 52.6 mg) and 5% Pd/CaCO<sub>3</sub> (0.1 mmol, 41.3 mg) stirred for 24 hrs. <sup>1</sup>H NMR (400 MHz, CDCl<sub>3</sub>, diastereomers) δ 9.61 (s, 1H), 9.48 (s, 1H), 7.60-7.57 (m, 3H), 7.53-7.51 (m, 3H), 7.49-7.45 (m, 2H), 7.36-7.29 (m, 5H), 7.25-7.22 (m, 1H), 6.98-6.93 (m, 2H), 6.84 (t, *J* = 7.6 Hz, 1H), 6.78 (t, *J*

= 7.6 Hz, 1H), 5.70 (brs, 1H), 5.39 (brs, 1H), 3.83 (q,  $J = 7.2$  Hz, 1H), 3.59 (q,  $J = 7.2$  Hz, 1H), 1.05 (s, 3H), 1.04 (s, 3H);  $^{13}\text{C}$  NMR (100 MHz,  $\text{CDCl}_3$ , diastereomers)  $\delta$  202.9, 201.1, 200.2, 200.0, 160.9, 160.0, 137.8, 137.68, 137.65, 136.7, 129.0, 128.8, 128.0, 127.9, 125.43, 125.35, 125.29, 125.25, 119.9, 119.8, 119.0, 112.1, 111.5, 72.6, 71.6, 53.8, 52.5, 9.1, 8.8; HRMS Calcd. for  $\text{C}_{17}\text{H}_{16}\text{NO}_2^+$   $[\text{M}+\text{H}]^+$ : 266.1176, found: 266.1183; **M.p.**: 167-169 °C.

$[\alpha]_D^{20} = -364.0$  (c 0.05,  $\text{CH}_2\text{Cl}_2$ ) for 91% and 94% ee; Enantiomeric excess was determined by HPLC with a Chiralcel AD-H column, Hexane/*i*PrOH = 95/5, 0.5 mL/min, 230 nm,  $t_{\text{minor}} = 65.593$  min,  $t_{\text{major}} = 57.335$  min and  $t_{\text{minor}} = 104.012$  min,  $t_{\text{major}} = 73.380$  min.

### **Racemic Sample of 5**

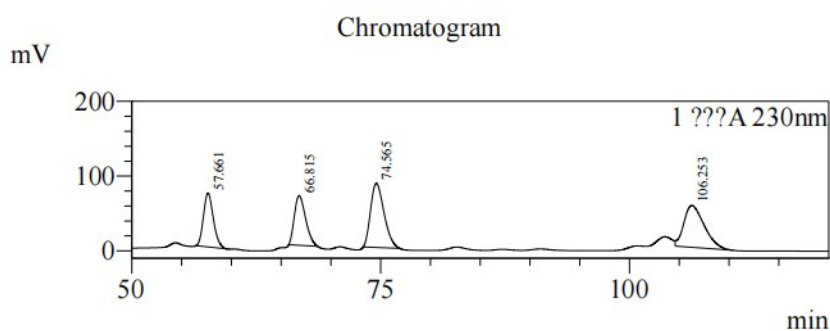

Peak Table

| Peak# | Ret. Time | Area     | Height | Area%   |
|-------|-----------|----------|--------|---------|
| 1     | 57.661    | 5003239  | 72057  | 19.040  |
| 2     | 66.815    | 5191389  | 66292  | 19.756  |
| 3     | 74.565    | 8071859  | 85793  | 30.718  |
| 4     | 106.253   | 8010428  | 55973  | 30.485  |
| Total |           | 26276914 | 280116 | 100.000 |

### **Enantiomeric Sample of 5**

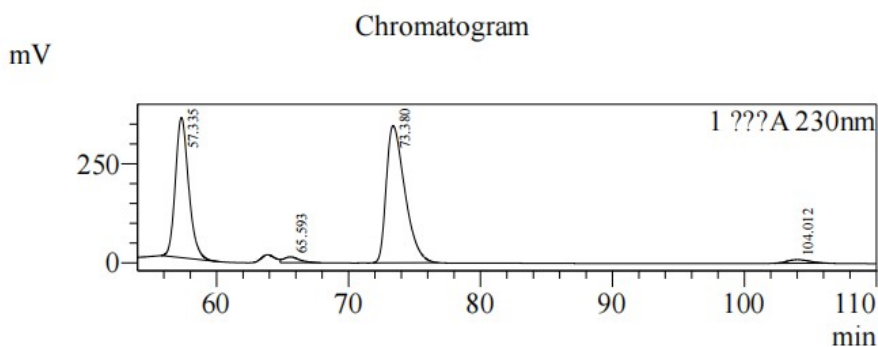

Peak Table

???A 230nm

| Peak# | Ret. Time | Area     | Height | Area%   |
|-------|-----------|----------|--------|---------|
| 1     | 57.335    | 24756013 | 353621 | 40.710  |
| 2     | 65.593    | 1218707  | 14592  | 2.004   |
| 3     | 73.380    | 33815178 | 346068 | 55.608  |
| 4     | 104.012   | 1020382  | 8861   | 1.678   |
| Total |           | 60810281 | 723141 | 100.000 |

#### d) Luche reduction

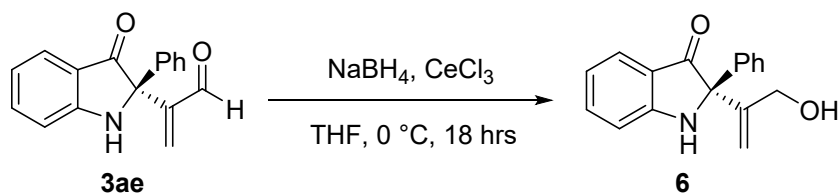

**Procedure (VI):** A solution of  $\text{NaBH}_4$  and  $\text{CeCl}_3$  in anhydrous THF was cooled to  $0\text{ }^\circ\text{C}$  under nitrogen atmosphere, the solution of **3ae** in anhydrous THF was added dropwise while maintained temperature at  $0\text{ }^\circ\text{C}$  for full conversion. The mixture was then quenched with saturated  $\text{NH}_4\text{Cl}$  solution and extracted twice with EtOAc, the organic layers were combined and dried over anhydrous  $\text{Na}_2\text{SO}_4$ . The residue obtained was purified by column chromatography (Petroleum ether/EtOAc: 8/1) to afford the product **6** in 93% yield with 94% ee.

#### (S)-2-(3-hydroxyprop-1-en-2-yl)-2-phenylindolin-3-one (**6**)

Compound **6** (24.7 mg, 93% yield) were obtained as yellow solid following the *procedure VI* from **3ae** (0.1 mmol, 26.3 mg),  $\text{NaBH}_4$  (0.11 mmol, 4.2 mg) and  $\text{CeCl}_3$  (0.1 mmol, 24.6 mg) stirred for 18 hrs.  $^1\text{H NMR}$  (400 MHz,  $\text{CDCl}_3$ )  $\delta$  7.61 (d,  $J = 7.6$  Hz, 1H), 7.53 (d,  $J = 8.0$  Hz, 2H), 7.48 (t,  $J = 8.0$  Hz, 1H), 7.36-7.29 (m, 3H), 6.94 (d,  $J = 8.0$  Hz, 1H), 6.84 (t,  $J = 7.6$  Hz, 1H), 5.80 (brs, 1H), 5.40 (d,  $J = 10.8$  Hz, 2H), 4.21 (d,  $J = 12.8$  Hz, 1H), 4.15 (d,  $J = 12.8$  Hz, 1H);  $^{13}\text{C NMR}$  (125 MHz,  $\text{CDCl}_3$ )  $\delta$  200.0,

160.0, 145.7, 138.4, 137.6, 128.7, 127.9, 126.5, 125.4, 119.8, 119.3, 116.7, 112.6, 75.1, 65.2; **HRMS** Calcd. for  $C_{17}H_{16}NO_2^+ [M+H]^+$ : 266.1176, found: 266.1182; **M.p.**: 47-49 °C.

$[\alpha]_D^{20} = -199.5$  (c 0.21,  $CH_2Cl_2$ ) for 94% ee; Enantiomeric excess was determined by HPLC with a Chiralcel OD-H column, Hexane/*i*PrOH = 80/20, 0.5 mL/min, 230 nm,  $t_{minor} = 14.368$  min,  $t_{major} = 12.197$  min.

### Racemic Sample of 6

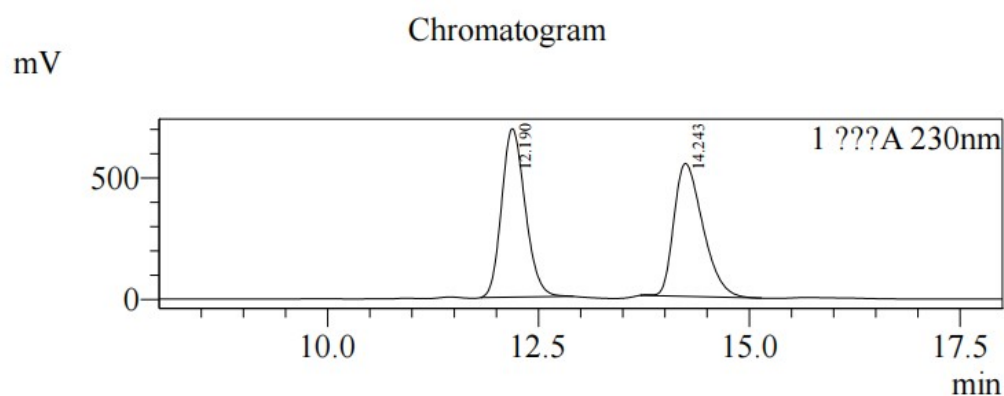

Peak Table

???A 230nm

| Peak# | Ret. Time | Area     | Height  | Area%   |
|-------|-----------|----------|---------|---------|
| 1     | 12.190    | 13515518 | 693656  | 50.720  |
| 2     | 14.243    | 13131542 | 547227  | 49.280  |
| Total |           | 26647060 | 1240883 | 100.000 |

### Enantiomeric Sample of 6

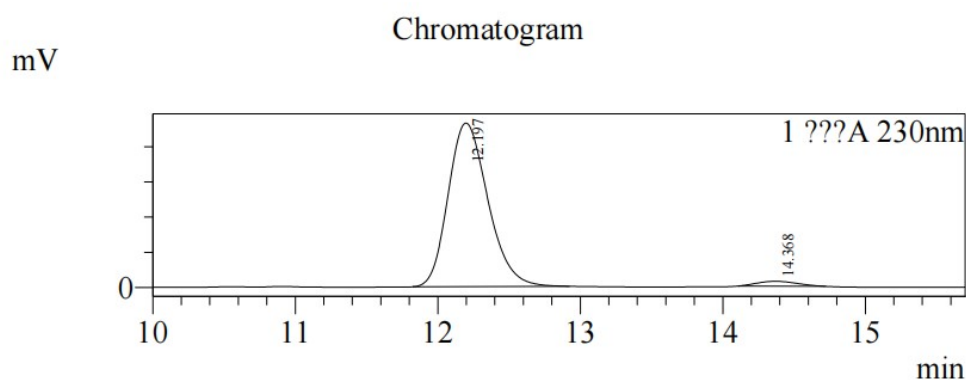

Peak Table

???A 230nm

| Peak# | Ret. Time | Area     | Height | Area%   |
|-------|-----------|----------|--------|---------|
| 1     | 12.197    | 18015067 | 929766 | 97.115  |
| 2     | 14.368    | 535253   | 27587  | 2.885   |
| Total |           | 18550320 | 957353 | 100.000 |



### e) Tsuji-Wilkinson Decarbonylation

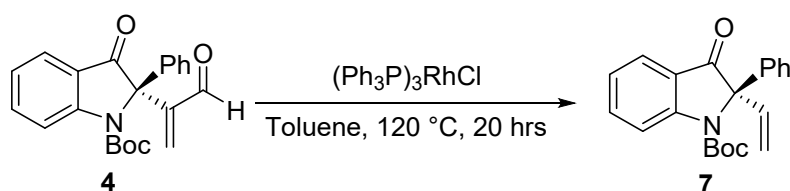

**Procedure (VII):** The compound **4a** (0.1 mmol, 1 equiv.) in dry toluene (2 mL) was vigorously purged with nitrogen for 30 min. In an inert atmosphere box, the reaction mixture was added  $\text{Rh}(\text{PPh}_3)_3\text{Cl}$  (0.1 mmol, 1 equiv.) and then heated at  $120\text{ }^\circ\text{C}$  for 20 hrs. The reaction mixture was cooled to room temperature and quenched with  $\text{H}_2\text{O}$ . Then the mixture was diluted with EtOAc, filtered through a Celite pad and the solvent was extracted twice with EtOAc, the organic layers were combined and dried over anhydrous  $\text{Na}_2\text{SO}_4$ . The residue obtained was purified by column chromatography (petroleum ether/EtOAc: 40/1 to 30/1) to afford the product **7** in 73% yield with 88% ee.

#### ***tert*-Butyl (*R*)-3-oxo-2-phenyl-2-vinylindoline-1-carboxylate (**7**)**

Compound **7** (24.6 mg, 73% yield) were obtained as yellow solid following the *procedure VII* from **4a** (0.1 mmol, 36.3 mg) and  $\text{Rh}(\text{PPh}_3)_3\text{Cl}$  (0.1 mmol, 93 mg) stirred for 20 hrs.  **$^1\text{H}$  NMR** (400 MHz,  $\text{CDCl}_3$ )  $\delta$  8.39 (s, 1H), 7.72 (dd,  $J = 19.2, 8.0$  Hz, 2H), 7.34-7.27 (m, 3H), 7.24 (d,  $J = 7.6$  Hz, 2H), 7.18 (t,  $J = 7.6$  Hz, 1H), 6.54 (dd,  $J = 17.6, 10.8$  Hz, 1H), 5.45 (d,  $J = 10.4$  Hz, 1H), 5.38 (d,  $J = 17.2$  Hz, 1H), 1.23 (s, 9H);  **$^{13}\text{C}$  NMR** (100 MHz,  $\text{CDCl}_3$ )  $\delta$  196.6, 153.3, 150.5, 138.4, 137.4, 133.3, 128.6, 127.8, 125.7, 125.0, 123.4, 121.5, 118.0, 116.8, 82.4, 76.2, 27.8; **HRMS** Calcd. for  $\text{C}_{21}\text{H}_{22}\text{NO}_3^+ [\text{M}+\text{H}]^+$ : 336.1600, found: 336.1601; **M.p.**:  $74\text{-}75\text{ }^\circ\text{C}$ .

$[\alpha]_{\text{D}}^{20} = -176.7$  (c 0.38,  $\text{CH}_2\text{Cl}_2$ ) for 88% ee; Enantiomeric excess was determined by HPLC with a Chiralcel OD-H column, Hexane/*i*PrOH = 95/5, 0.5 mL/min, 230 nm,  $t_{\text{minor}} = 10.745$  min,  $t_{\text{major}} = 9.639$  min.

#### **Racemic Sample of 7**

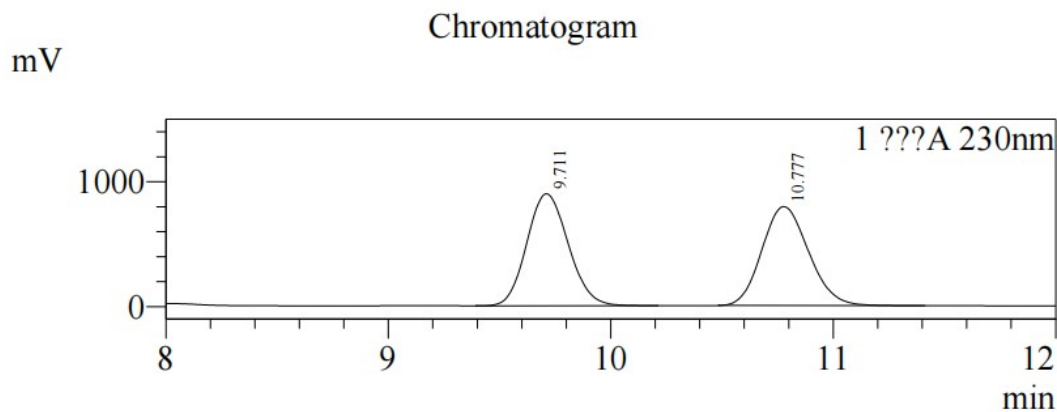

Peak Table

???A 230nm

| Peak# | Ret. Time | Area     | Height  | Area%   |
|-------|-----------|----------|---------|---------|
| 1     | 9.711     | 11639295 | 896520  | 50.139  |
| 2     | 10.777    | 11574560 | 792510  | 49.861  |
| Total |           | 23213855 | 1689029 | 100.000 |

**Enantiomeric Sample of 7**

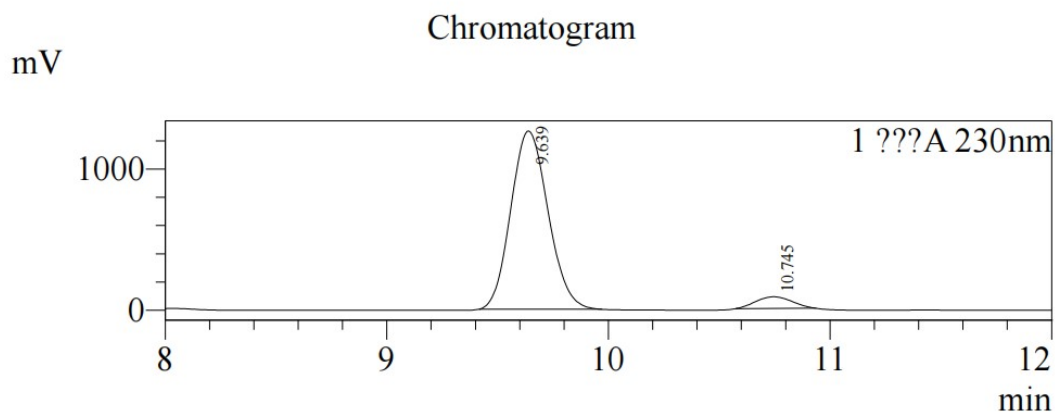

Peak Table

???A 230nm

| Peak# | Ret. Time | Area     | Height  | Area%   |
|-------|-----------|----------|---------|---------|
| 1     | 9.639     | 14782317 | 1262981 | 94.016  |
| 2     | 10.745    | 940957   | 82847   | 5.984   |
| Total |           | 15723274 | 1345827 | 100.000 |

**f) Pinnick oxidation for the preparation of compound 8**

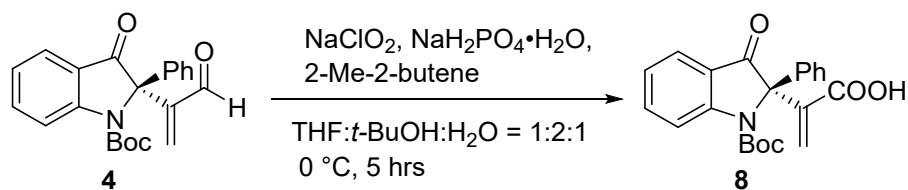

**Procedure (VIII):** The compound **4** (0.1 mmol, 1 equiv.), NaH<sub>2</sub>PO<sub>4</sub> (0.6 mmol, 6 equiv.) was dissolved in the mixture solution of THF, *t*-BuOH and H<sub>2</sub>O (1:2:1 mL), 2-Me-2-butene (1 mmol, 10 equiv.) was added dropwisely by a syringe at 0 °C, then NaClO (0.5 mmol, 5 equiv.) was added in above solution while maintaining temperature at 0 °C for full conversion. After conversion, the reaction solution was quenched with Na<sub>2</sub>SO<sub>3</sub> (0.8 mmol, 8 equiv.), then 0.5 M HCl was added for acidification. The obtained mixture was extracted twice with EtOAc and water, the organic layers obtained were dried over anhydrous Na<sub>2</sub>SO<sub>4</sub> and purified by column chromatography (DCM/MeOH: 10/1) to afford the product **8** in 95% yield.

**(S)-2-(1-(tert-butoxycarbonyl)-3-oxo-2-phenylindolin-2-yl)acrylic acid (**8**)**

Compound **8** (36 mg, 95% yield) were obtained as yellow solid following the *procedure VIII* from **4a** (0.1 mmol, 36.3 mg), NaH<sub>2</sub>PO<sub>4</sub> (0.6 mmol, 93.6 mg), 2-Me-2-butene (1 mmol, 0.11 mL) and NaClO<sub>2</sub> (0.5 mmol, 45.2 mg) stirred for 5 hrs. <sup>1</sup>H NMR (400 MHz, CDCl<sub>3</sub>) δ 8.23 (d, *J* = 7.2 Hz, 1H), 7.55-7.50 (m, 2H), 7.44 (d, *J* = 6.8 Hz, 2H), 7.32-7.28 (m, 3H), 7.02 (t, *J* = 7.2 Hz, 1H), 6.54 (s, 1H), 5.71 (s, 2H), 1.38 (s, 9H); <sup>13</sup>C NMR (125 MHz, CDCl<sub>3</sub>) δ 197.5, 170.2, 152.4, 151.3, 142.1, 136.1, 134.5, 132.0, 128.0, 127.9, 124.3, 123.1, 117.1, 82.9, 76.3, 28.0; HRMS Calcd. for C<sub>22</sub>H<sub>21</sub>NO<sub>5</sub>Na<sup>+</sup> [M+Na]<sup>+</sup>: 402.1317, found: 402.1321; M.p.: 170-172 °C; [α]<sup>20</sup><sub>D</sub> = -25.2 (c 0.70, CH<sub>2</sub>Cl<sub>2</sub>).

**g) Preparation of compound 9**

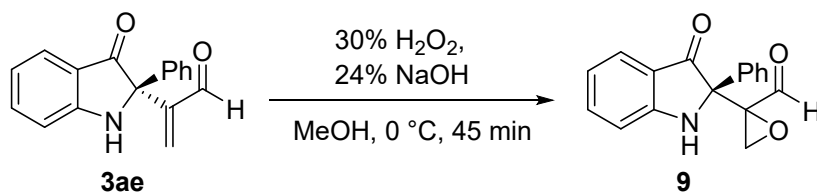

**Procedure (IX):** A solution of **3ae** (0.1 mmol, 1 equiv.) in MeOH was cooled to 0 °C under nitrogen atmosphere, 30% H<sub>2</sub>O<sub>2</sub> (0.2 mmol, 2 equiv.) was added dropwisely slowly while keeping temperature at 0 °C, then 24% NaOH (0.03 mmol, 0.3 equiv.) was added in above solution while keeping temperature at 0 °C for full conversion. The mixture was then quenched with saturated Na<sub>2</sub>S<sub>2</sub>O<sub>3</sub> solution and extracted twice with

EtOAc, the organic layers were combined and dried over anhydrous Na<sub>2</sub>SO<sub>4</sub>. The residue obtained was purified by column chromatography (Petroleum ether/EtOAc: 8/1) to afford the product **9** in 44% yield with 93% ee.

### 2-((*S*)-3-oxo-2-phenylindolin-2-yl)oxirane-2-carbaldehyde (**9**)

Compound **9** (12.3 mg, 44% yield) were obtained as yellow solid following the *procedure IX* from **3ae** (0.1 mmol, 26.3 mg), 30% H<sub>2</sub>O<sub>2</sub> (0.2 mmol, 22.7 mg, 15  $\mu$ L) and 24% NaOH (0.03 mmol, 5 mg, 5  $\mu$ L) stirred for 45 mins.

<sup>1</sup>H NMR (400 MHz, CDCl<sub>3</sub>)  $\delta$  8.93 (s, 1H), 7.50 (dd, *J* = 18.8, 7.6 Hz, 4H), 7.37-7.29 (m, 3H), 6.94 (d, *J* = 8.4 Hz, 1H), 6.83 (t, *J* = 7.6 Hz, 1H), 5.73 (s, 1H), 4.22 (d, *J* = 4.4 Hz, 1H), 3.35 (d, *J* = 4.4 Hz, 1H); <sup>13</sup>C NMR (100 MHz, CDCl<sub>3</sub>)  $\delta$  196.9, 196.6, 160.5, 138.0, 136.2, 129.0, 128.4, 125.53, 125.51, 119.5, 118.3, 111.6, 68.8, 61.6, 48.5; HRMS Calcd. for C<sub>17</sub>H<sub>14</sub>NO<sub>3</sub><sup>+</sup> [M+H]<sup>+</sup>: 280.0968, found: 280.0975; **M.p.**: 166-168 °C; [ $\alpha$ ]<sub>D</sub><sup>20</sup> = -307.8 (c 0.20, CH<sub>2</sub>Cl<sub>2</sub>). for 93% ee; Enantiomeric excess was determined by HPLC with a Chiralcel AD-H column, Hexane/*i*PrOH = 90/10, 0.5 mL/min, 230 nm, *t*<sub>minor</sub> = 22.317 min, *t*<sub>major</sub> = 24.102 min.

### Racemic Sample of 9

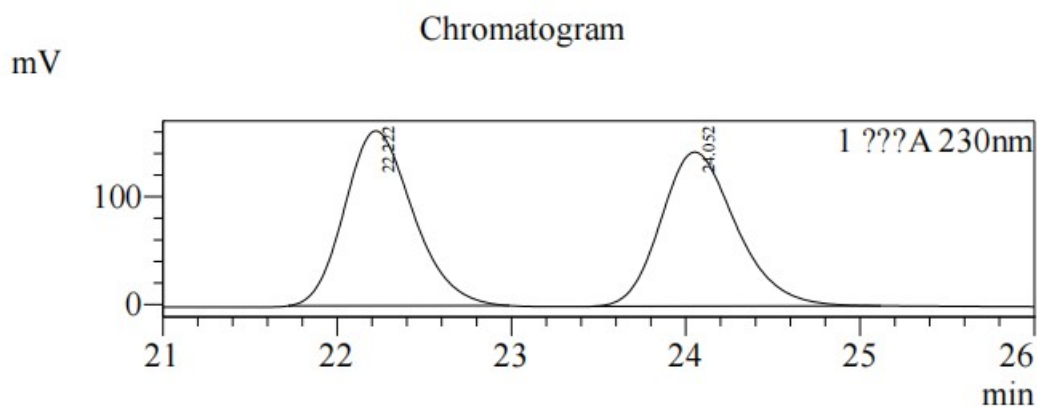

Peak Table

???A 230nm

| Peak# | Ret. Time | Area    | Height | Area%   |
|-------|-----------|---------|--------|---------|
| 1     | 22.222    | 4429509 | 162145 | 50.812  |
| 2     | 24.052    | 4287870 | 142877 | 49.188  |
| Total |           | 8717378 | 305022 | 100.000 |

### Enantiomeric Sample of 9

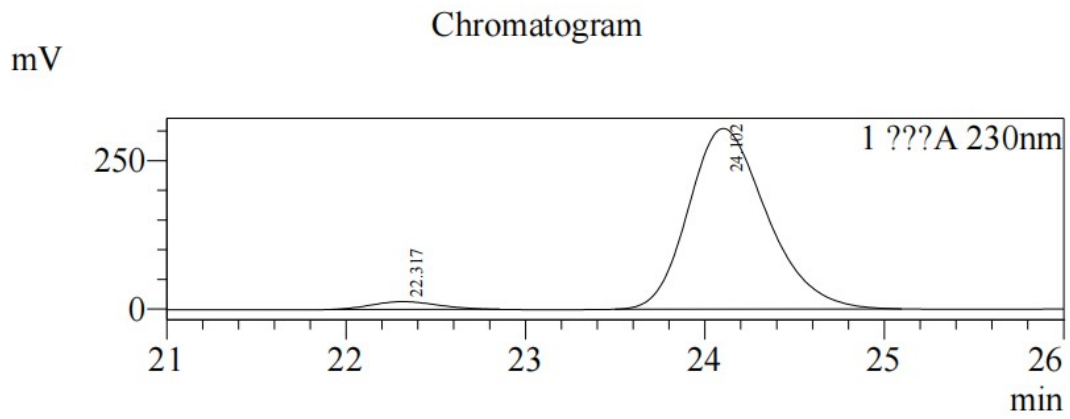

Peak Table

???A 230nm

| Peak# | Ret. Time | Area    | Height | Area%   |
|-------|-----------|---------|--------|---------|
| 1     | 22.317    | 336879  | 13128  | 3.522   |
| 2     | 24.102    | 9227023 | 304232 | 96.478  |
| Total |           | 9563902 | 317360 | 100.000 |

## **5. References**

- [1] (a) K.-Q. Ling, *Synth. Commun.*, **1995**, *25*, 3831; (b) H. Chung, J. Kim, G.-A. González-Montiel, P. Ha-Yeon Cheong, H.-G. Lee, *Org. Lett.*, **2021**, *23*, 1096; (c) X. Yuan, X.-D. Wu, F. Peng, H.-J. Yang, C.-J. Zhu, H. Fu, *Chem. Commun.*, **2020**, *56*, 12648. (d) B. Yin, P.-P. Huang, Y.-B. Lu, L.-X. Liu, *RSC Adv.*, **2017**, *7*, 606.
- [2] T. Cablewski, A.-F. Faux, C.-R. Strauss, *J. Org. Chem.*, **1994**, *59*, 3408.
- [3] M. Ito, A. Osaku, C. Kobayashi, A. Shibashi, T. Ikariya, *Organometallics*, **2009**, *28*, 390.
- [4] G. Bian, W. Shan, W. Su, *Journal of Chemical Research*, **2005**, 585.
- [5] (a) J.-J. Gong, K. Yuan, X.-Y. Wu, *Tetrahedron: Asymmetry*, **2009**, *20*, 2117; (b) Z. Dong, C. Yan, Y.-Z. Gao, C.-N. Dong, G.-F. Qiu, H.-B. Zhou, *Adv. Synth. Catal.*, **2015**, *357*, 2132; (c) S.-Q. Fang, J.-P. Tan, J.-K. Pan, H.-K. Zhang, Y. Chen, X.-Y. Ren, T.-L. Wang, *Angew. Chem. Int. Ed.*, **2021**, *60*, 14921; (d) X.-Y. Han, Y.-Q. Wang, F.-R. Zhong, Y. Lu, *Org. Biomol. Chem.*, **2011**, *9*, 6734. (e) Y. Lu, N. He, X. Miao, D. Wang, *Org. Chem. Front.*, **2022**, *9*, 4840.

## 6. X-ray data

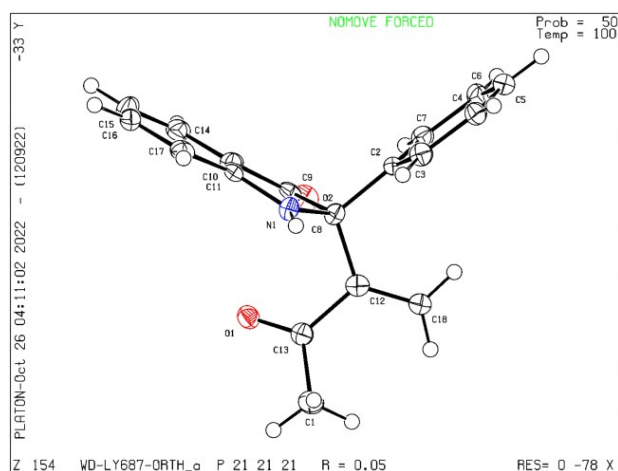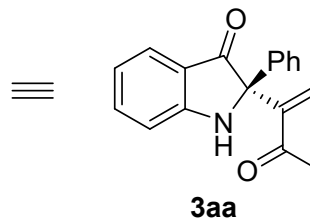

Table 1. Crystal data and structure refinement for WD-LY687-ORTH\_a-finalcif.

|                                   |                                                  |          |
|-----------------------------------|--------------------------------------------------|----------|
| Identification code               | WD-LY687-ORTH_a                                  |          |
| Empirical formula                 | C <sub>18</sub> H <sub>15</sub> N O <sub>2</sub> |          |
| Formula weight                    | 277.31                                           |          |
| Temperature                       | 100(2) K                                         |          |
| Wavelength                        | 1.54178 Å                                        |          |
| Crystal system                    | Orthorhombic                                     |          |
| Space group                       | P2 <sub>1</sub> 2 <sub>1</sub> 2 <sub>1</sub>    |          |
| Unit cell dimensions              | a = 8.8982(5) Å                                  | α = 90°. |
|                                   | b = 12.1235(7) Å                                 | β = 90°. |
|                                   | c = 13.0719(7) Å                                 | γ = 90°. |
| Volume                            | 1410.16(14) Å <sup>3</sup>                       |          |
| Z                                 | 4                                                |          |
| Density (calculated)              | 1.306 Mg/m <sup>3</sup>                          |          |
| Absorption coefficient            | 0.683 mm <sup>-1</sup>                           |          |
| F(000)                            | 584                                              |          |
| Crystal size                      | 0.15 x 0.12 x 0.1 mm <sup>3</sup>                |          |
| Theta range for data collection   | 6.016 to 67.487°.                                |          |
| Index ranges                      | -10 ≤ h ≤ 10, -14 ≤ k ≤ 14, -15 ≤ l ≤ 15         |          |
| Reflections collected             | 13582                                            |          |
| Independent reflections           | 2449 [R(int) = 0.0572]                           |          |
| Completeness to theta = 67.487°   | 97.3 %                                           |          |
| Absorption correction             | Semi-empirical from equivalents                  |          |
| Refinement method                 | Full-matrix least-squares on F <sup>2</sup>      |          |
| Data / restraints / parameters    | 2449 / 0 / 191                                   |          |
| Goodness-of-fit on F <sup>2</sup> | 1.646                                            |          |

|                                      |                                    |
|--------------------------------------|------------------------------------|
| Final R indices [ $I > 2\sigma(I)$ ] | R1 = 0.0541, wR2 = 0.1838          |
| R indices (all data)                 | R1 = 0.0555, wR2 = 0.1889          |
| Absolute structure parameter         | 0.05(11)                           |
| Extinction coefficient               | n/a                                |
| Largest diff. peak and hole          | 0.368 and -0.371 e.Å <sup>-3</sup> |

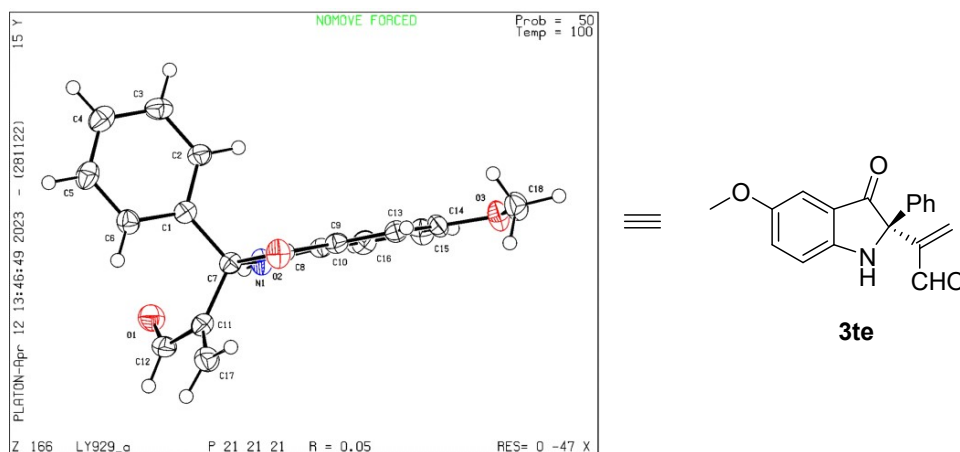

Table 1. Crystal data and structure refinement for LY929\_a-finalcif.

|                                 |                                                                                                       |
|---------------------------------|-------------------------------------------------------------------------------------------------------|
| Identification code             | LY929_a                                                                                               |
| Empirical formula               | C <sub>18</sub> H <sub>15</sub> N <sub>2</sub> O <sub>3</sub>                                         |
| Formula weight                  | 293.31                                                                                                |
| Temperature                     | 100(2) K                                                                                              |
| Wavelength                      | 1.54178 Å                                                                                             |
| Crystal system                  | Orthorhombic                                                                                          |
| Space group                     | P2 <sub>1</sub> 2 <sub>1</sub> 2 <sub>1</sub>                                                         |
| Unit cell dimensions            | a = 10.4311(17) Å      α = 90°.<br>b = 11.3052(17) Å      β = 90°.<br>c = 12.2205(18) Å      γ = 90°. |
| Volume                          | 1441.1(4) Å <sup>3</sup>                                                                              |
| Z                               | 4                                                                                                     |
| Density (calculated)            | 1.352 Mg/m <sup>3</sup>                                                                               |
| Absorption coefficient          | 0.753 mm <sup>-1</sup>                                                                                |
| F(000)                          | 616                                                                                                   |
| Crystal size                    | 0.10 x 0.09 x 0.07 mm <sup>3</sup>                                                                    |
| Theta range for data collection | 5.330 to 68.068°.                                                                                     |
| Index ranges                    | -12 ≤ h ≤ 12, -13 ≤ k ≤ 13, -14 ≤ l ≤ 11                                                              |
| Reflections collected           | 12864                                                                                                 |
| Independent reflections         | 2506 [R(int) = 0.0904]                                                                                |
| Completeness to theta = 67.679° | 97.1 %                                                                                                |



|                                   |                                             |
|-----------------------------------|---------------------------------------------|
| Absorption correction             | Semi-empirical from equivalents             |
| Max. and min. transmission        | 0.7528 and 0.5246                           |
| Refinement method                 | Full-matrix least-squares on F <sup>2</sup> |
| Data / restraints / parameters    | 2506 / 0 / 200                              |
| Goodness-of-fit on F <sup>2</sup> | 1.033                                       |
| Final R indices [I>2sigma(I)]     | R1 = 0.0504, wR2 = 0.1031                   |
| R indices (all data)              | R1 = 0.0753, wR2 = 0.1184                   |
| Absolute structure parameter      | 0.0(2)                                      |
| Extinction coefficient            | n/a                                         |
| Largest diff. peak and hole       | 0.265 and -0.233 e.Å <sup>-3</sup>          |

## 7. NMR Spectra

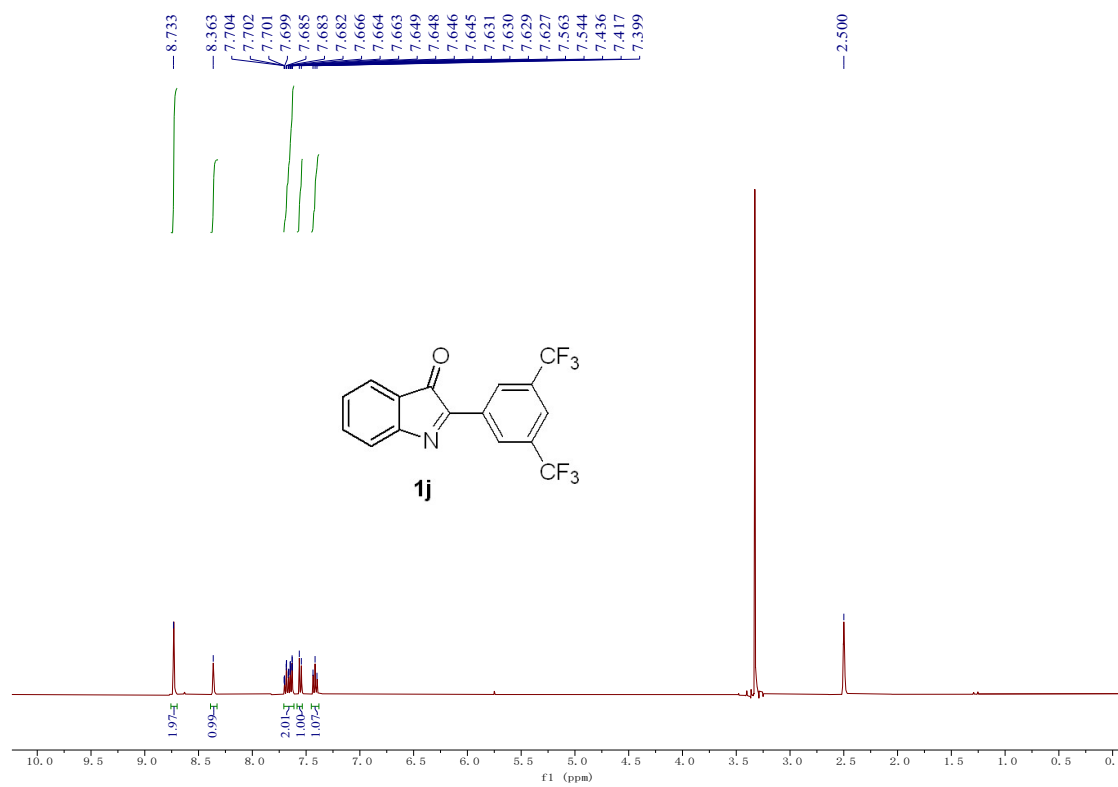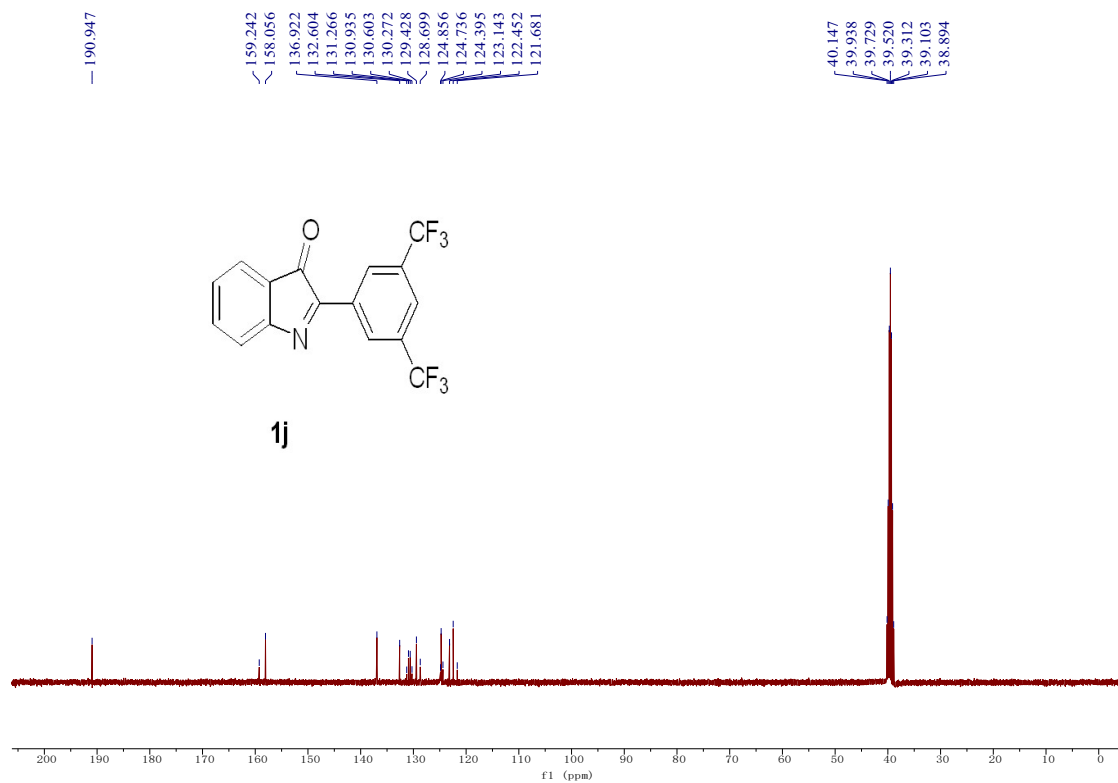

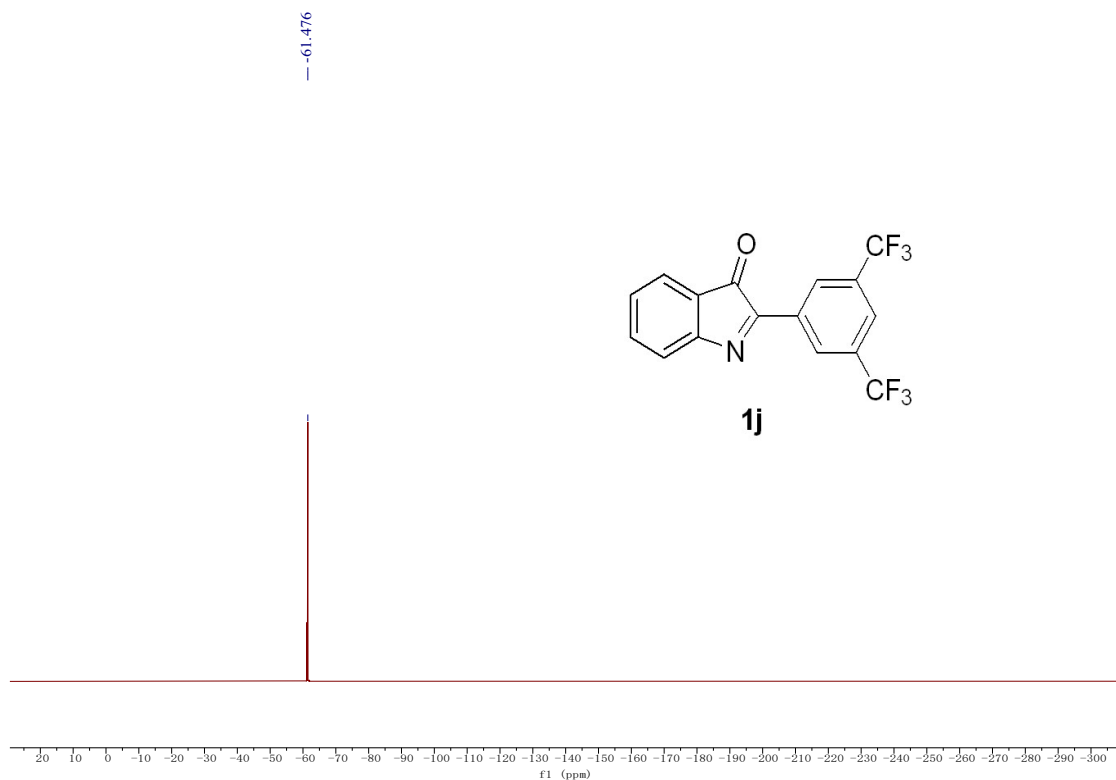

$^1\text{H}$ ,  $^{13}\text{C}$  and  $^{19}\text{F}$  NMR spectra of compound **1j** (400 MHz,  $\text{DMSO-}d_6$ )

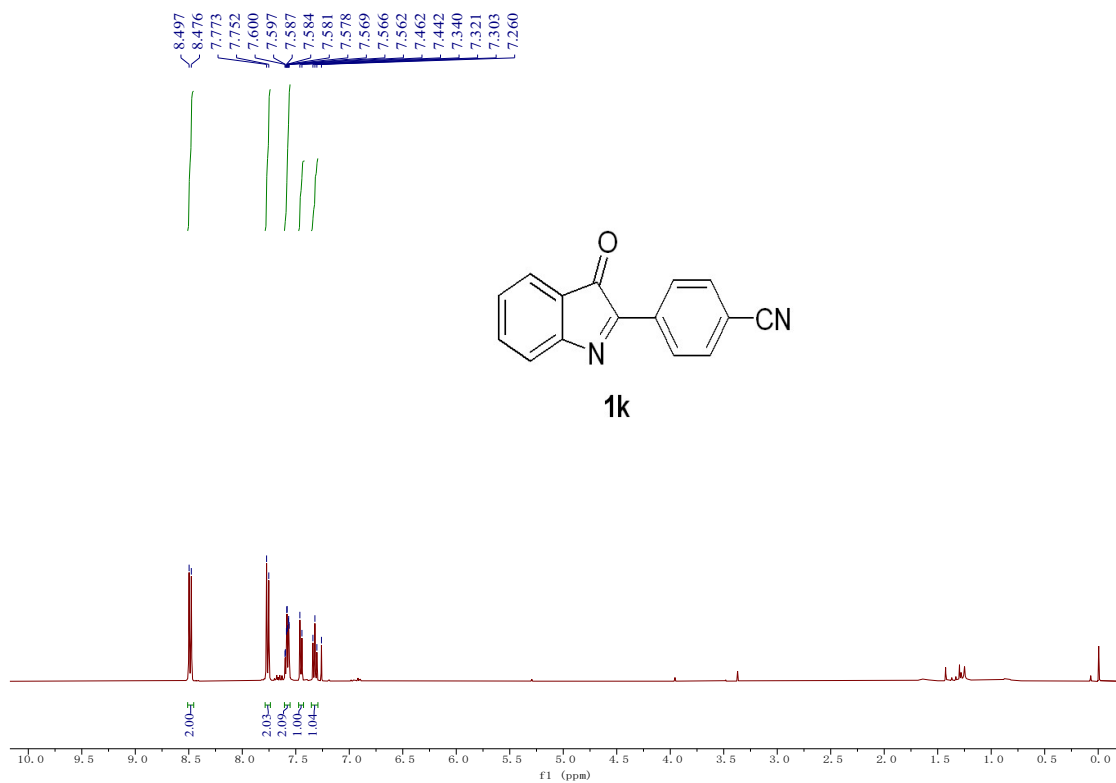

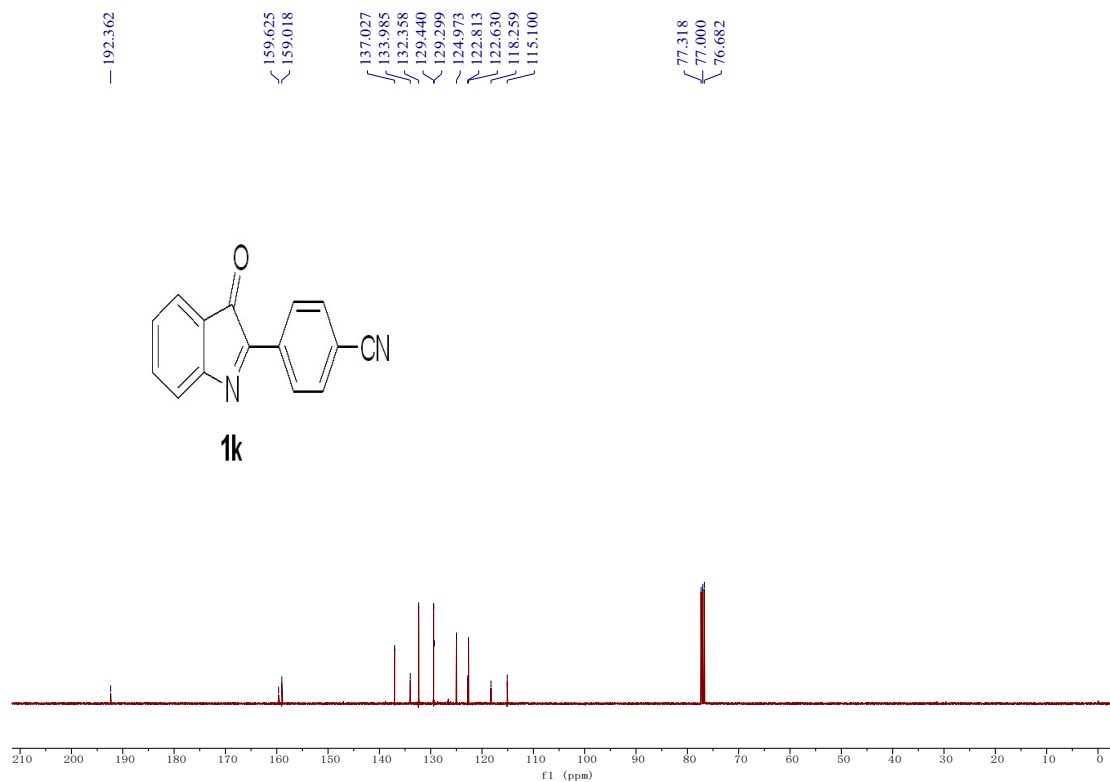

<sup>1</sup>H and <sup>13</sup>C NMR spectra of compound **1k** (400 MHz, CDCl<sub>3</sub>)

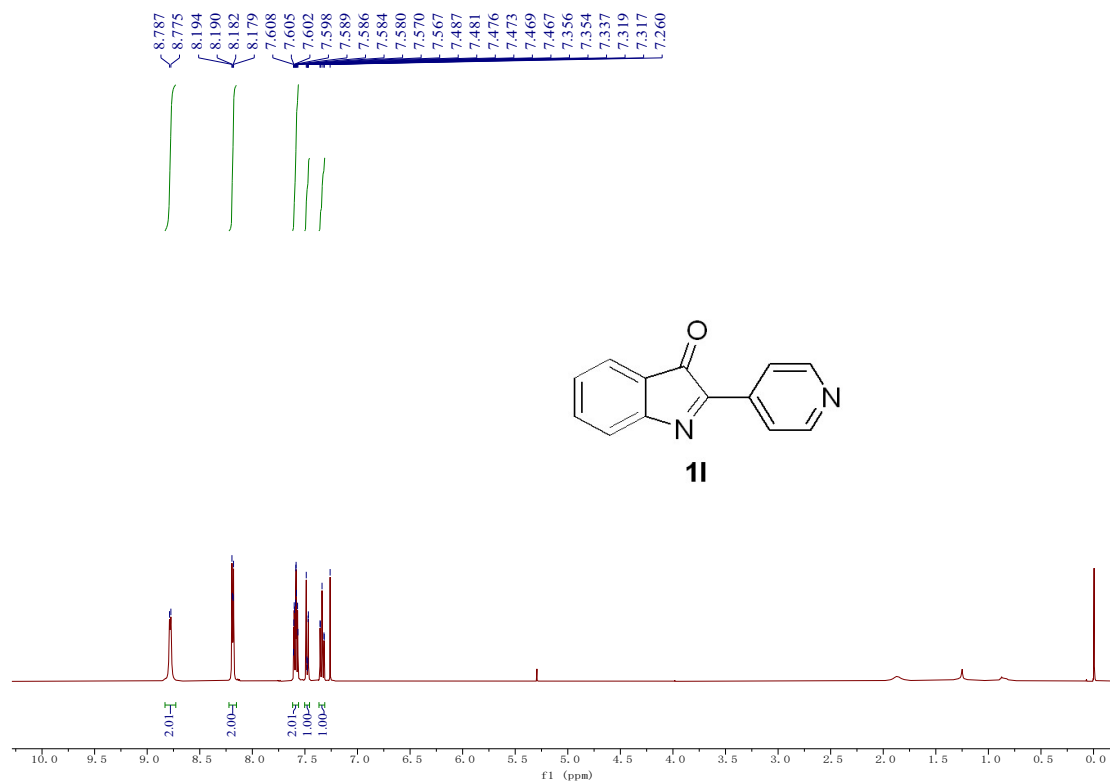

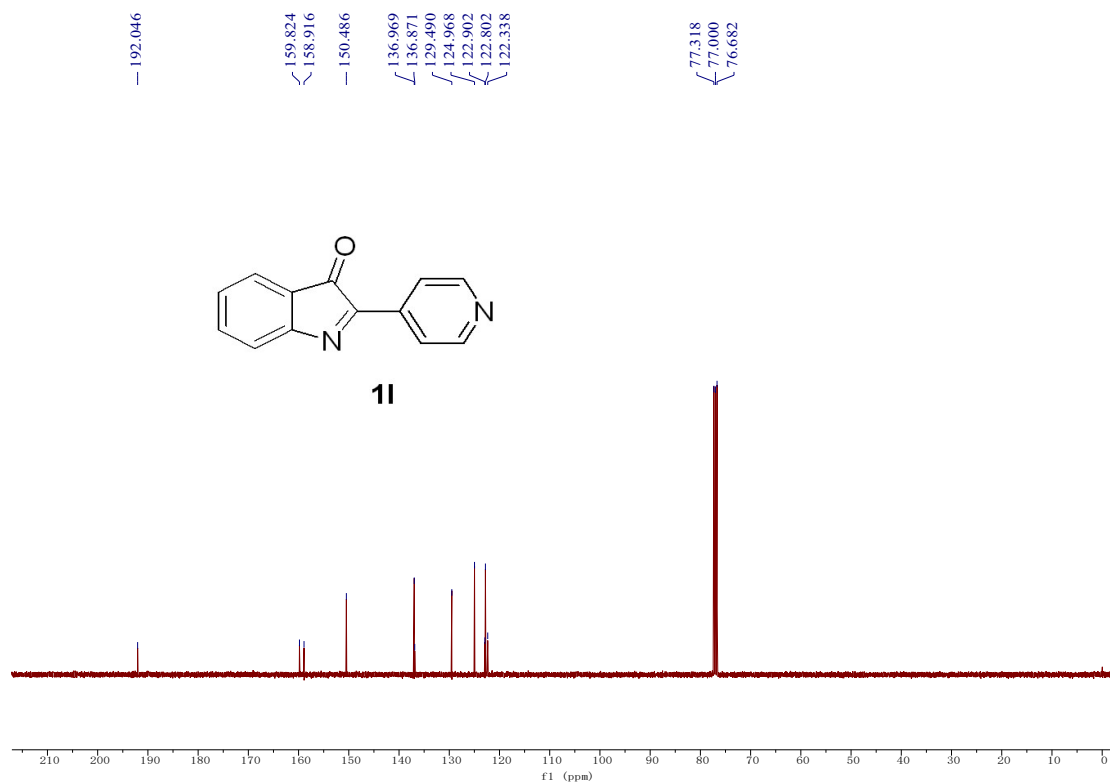

<sup>1</sup>H and <sup>13</sup>C NMR spectra of compound **11** (400 MHz, CDCl<sub>3</sub>)

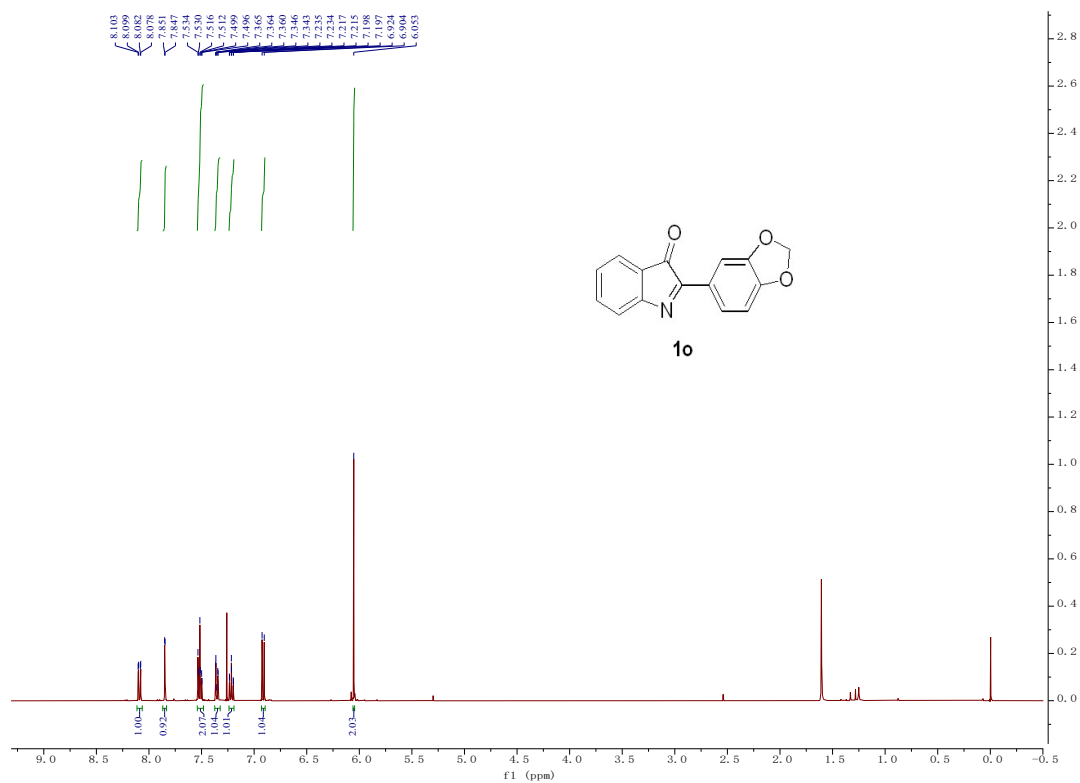

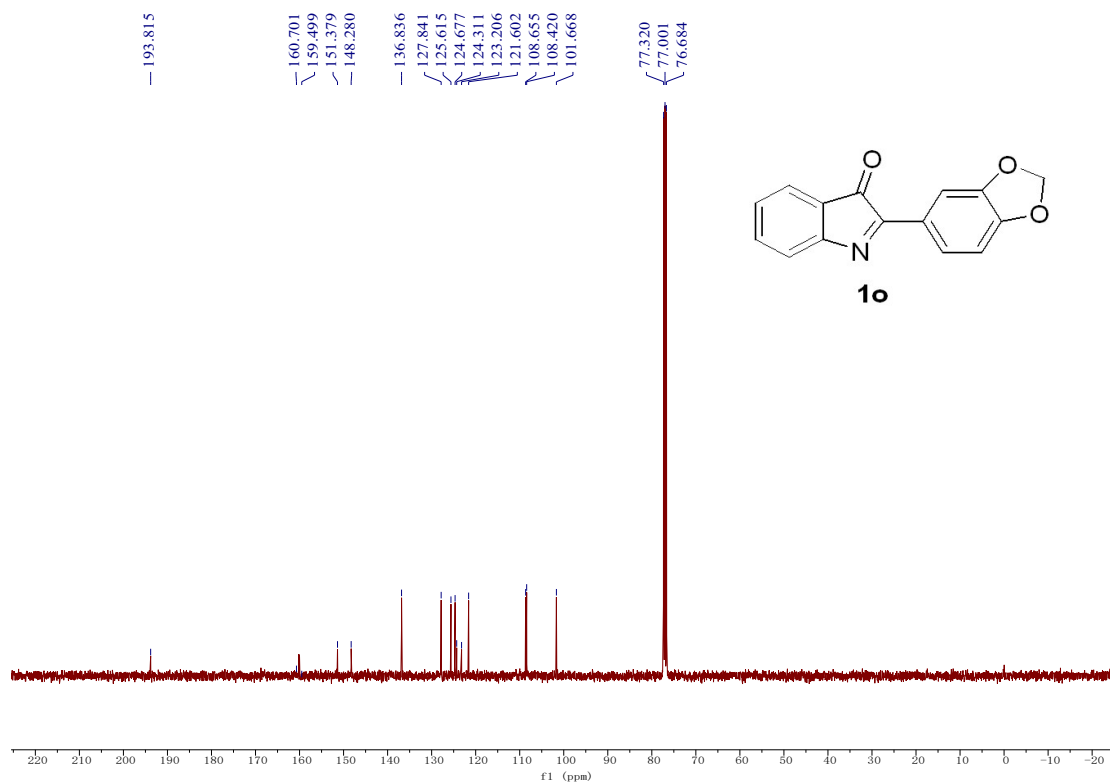

<sup>1</sup>H and <sup>13</sup>C NMR spectra of compound **1o** (400 MHz, CDCl<sub>3</sub>)

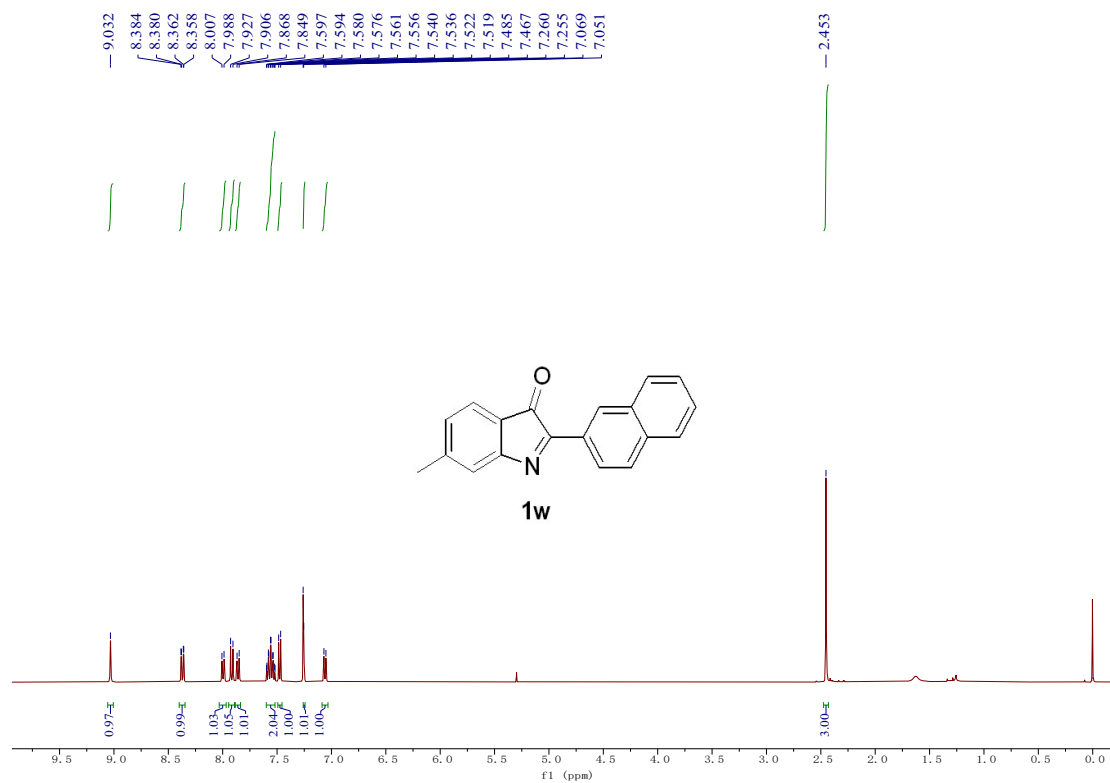

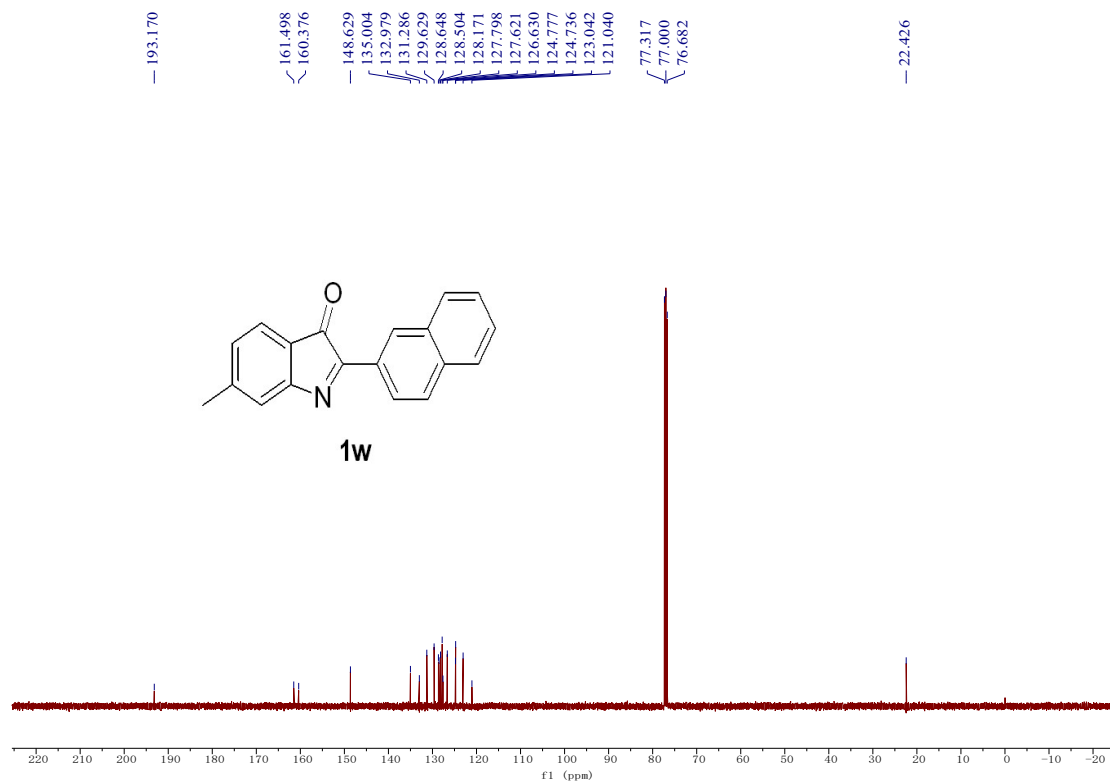

<sup>1</sup>H and <sup>13</sup>C NMR spectra of compound **1w** (400 MHz, CDCl<sub>3</sub>)

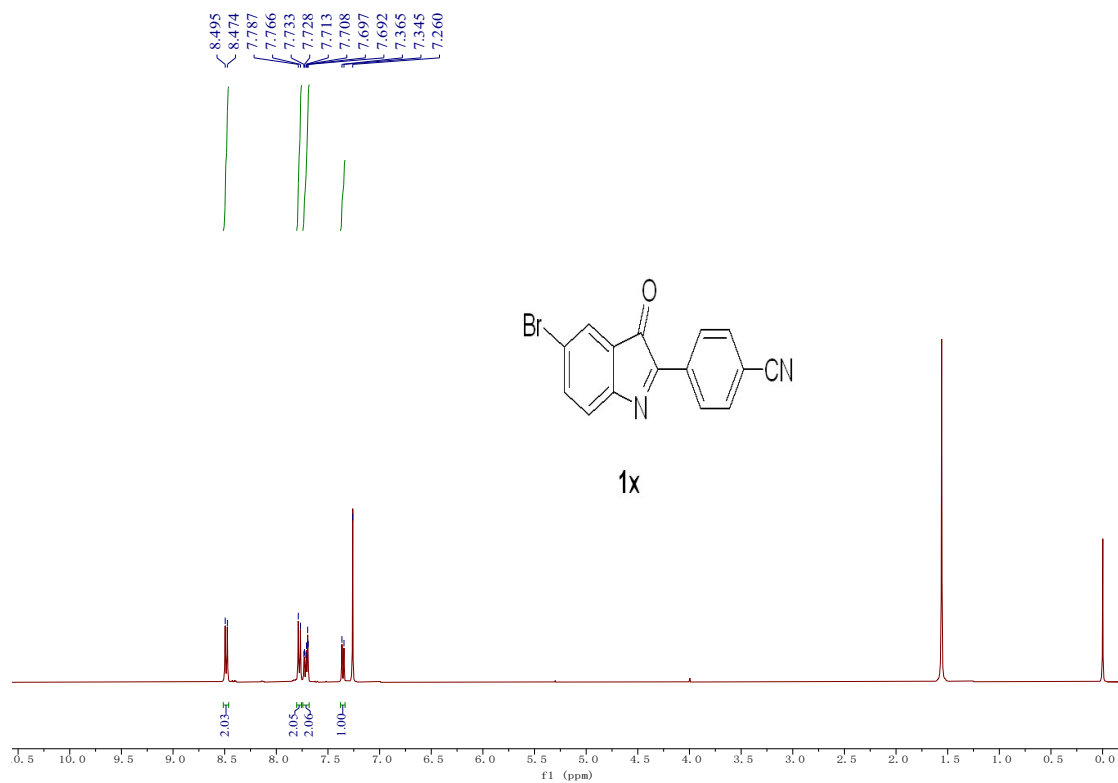

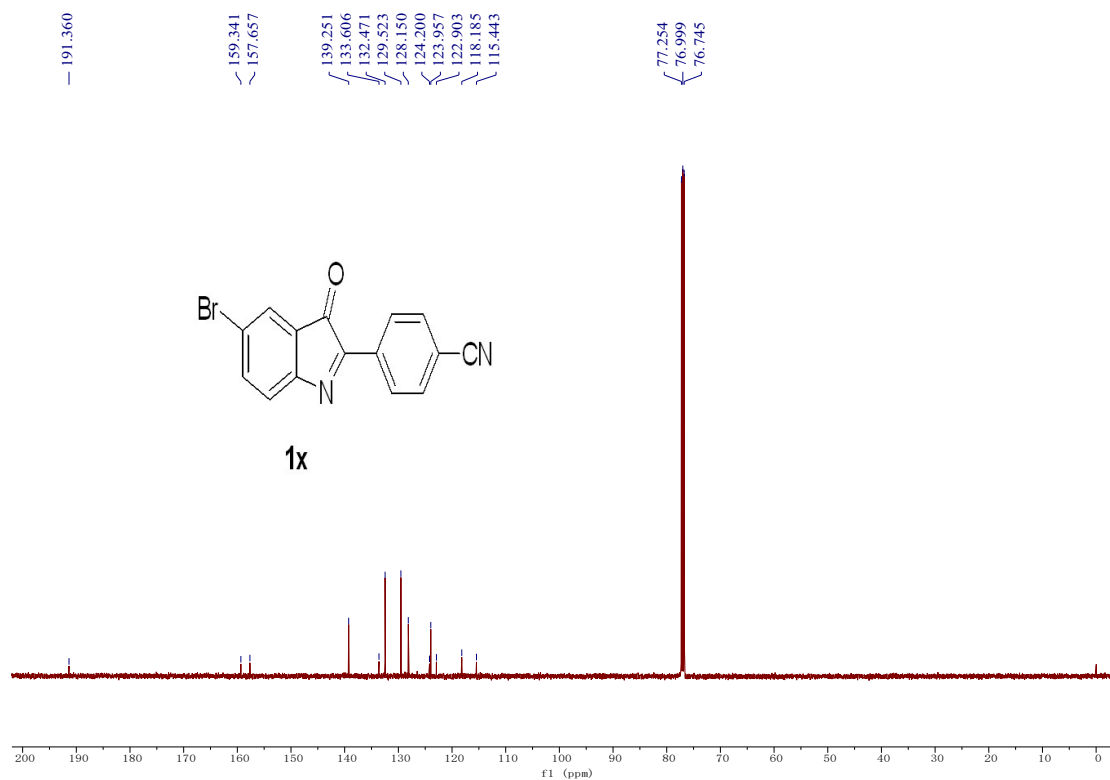

<sup>1</sup>H and <sup>13</sup>C NMR spectra of compound **1x**

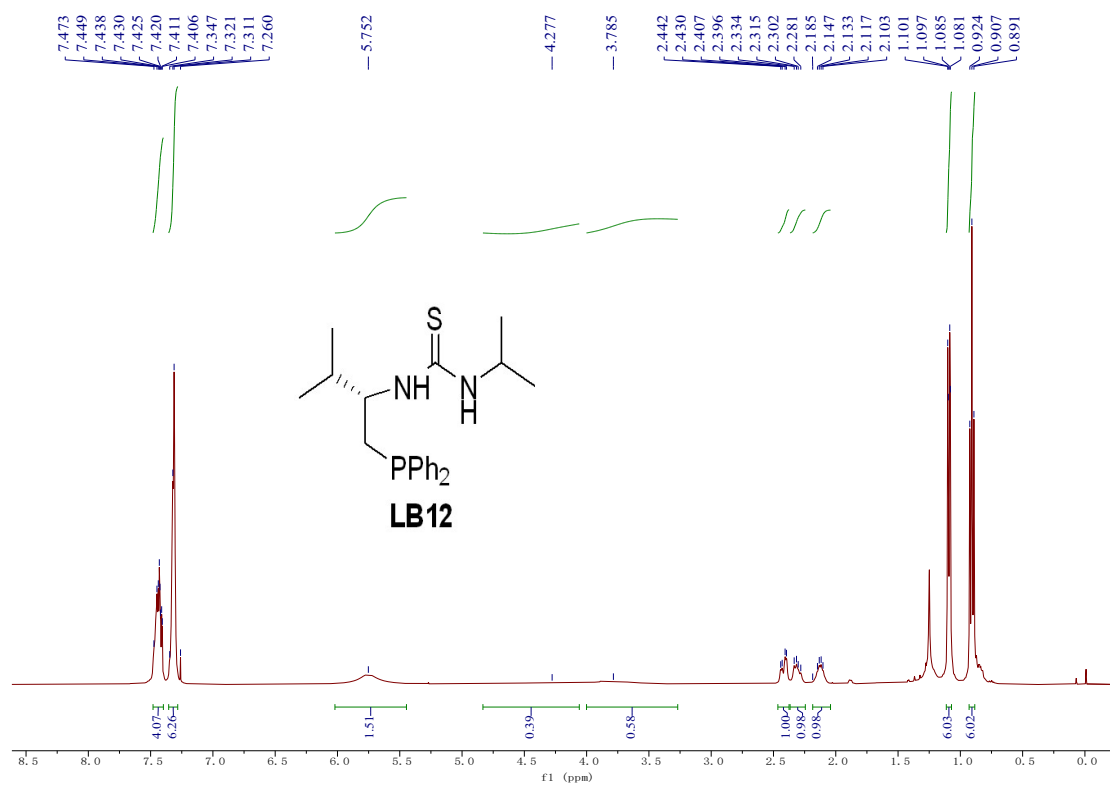



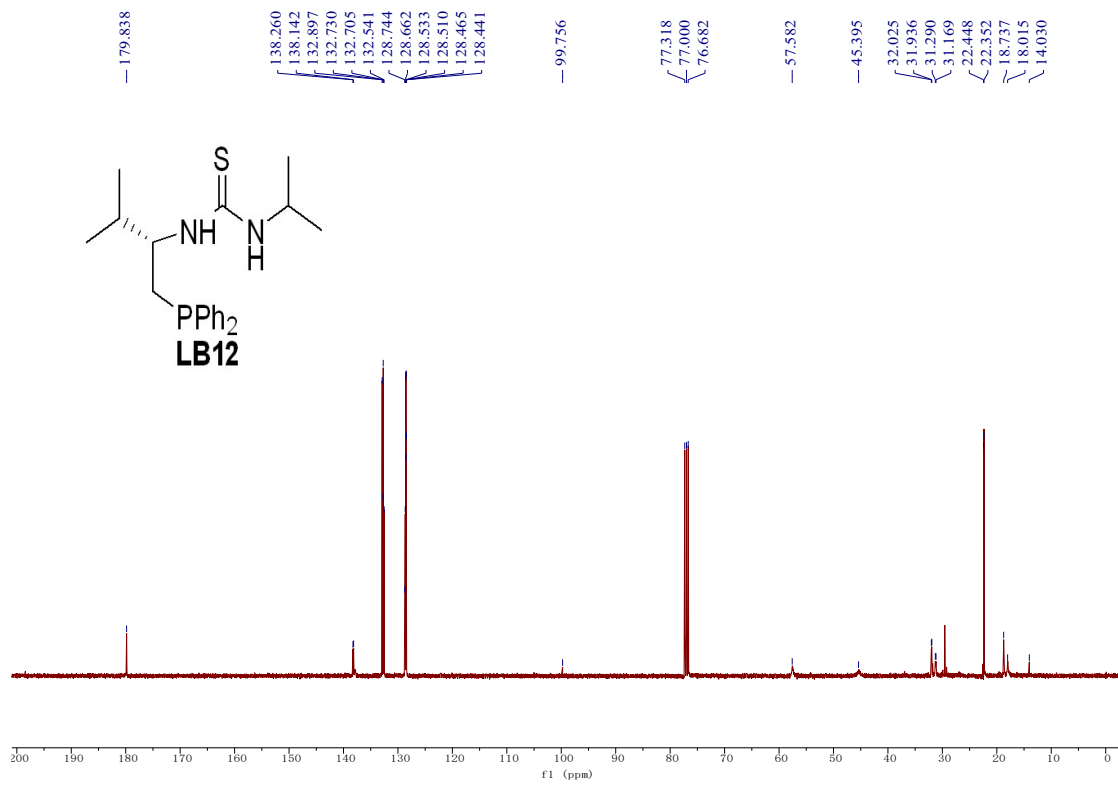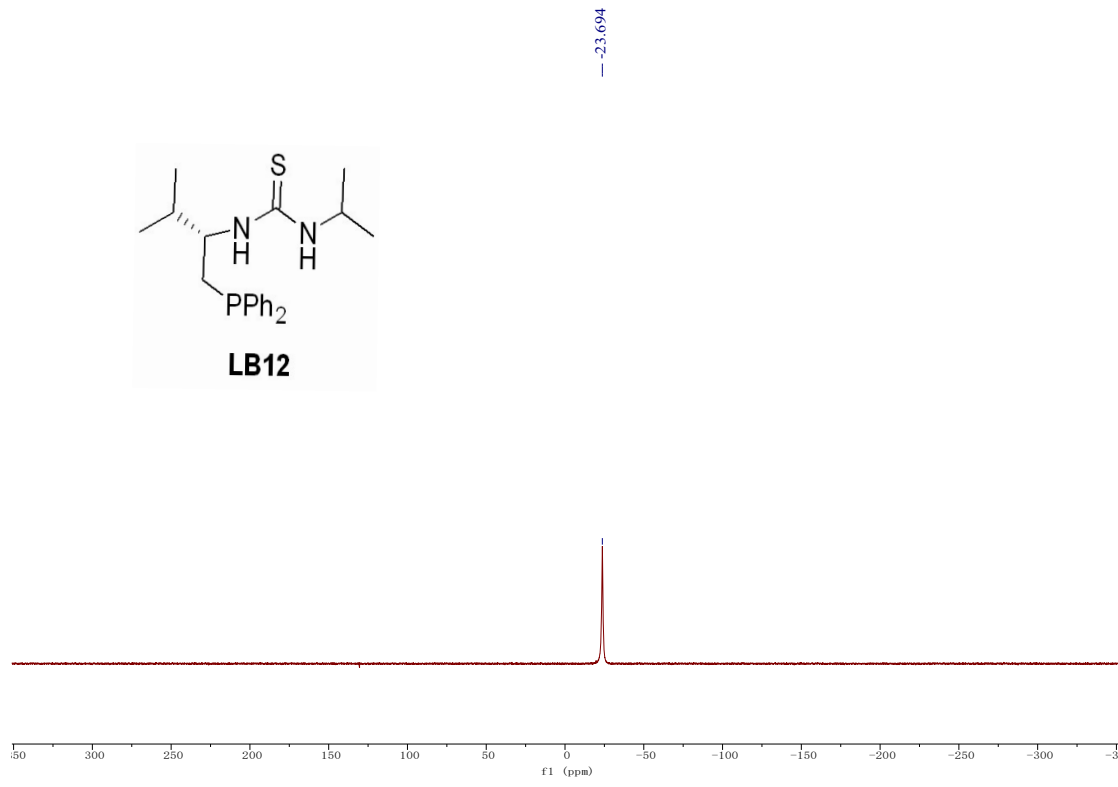

$^1\text{H}$ ,  $^{13}\text{C}$  and  $^{31}\text{P}$  NMR spectra of compound **LB12** (400 MHz,  $\text{CDCl}_3$ )

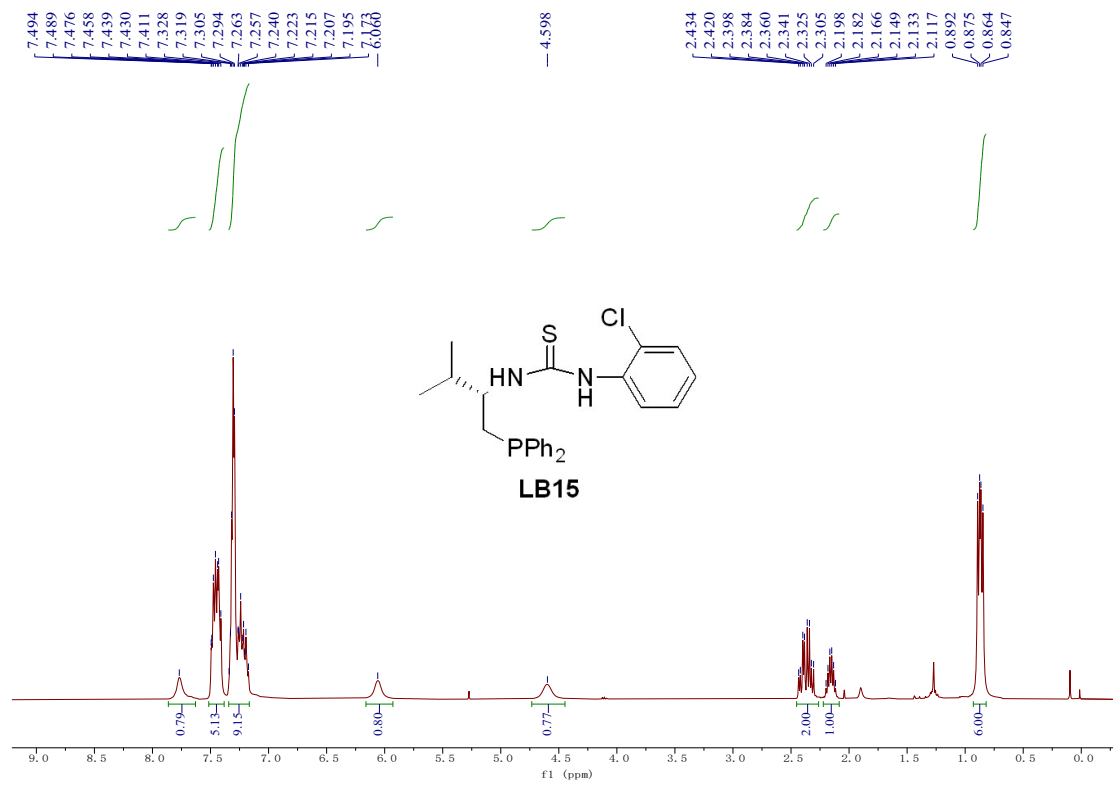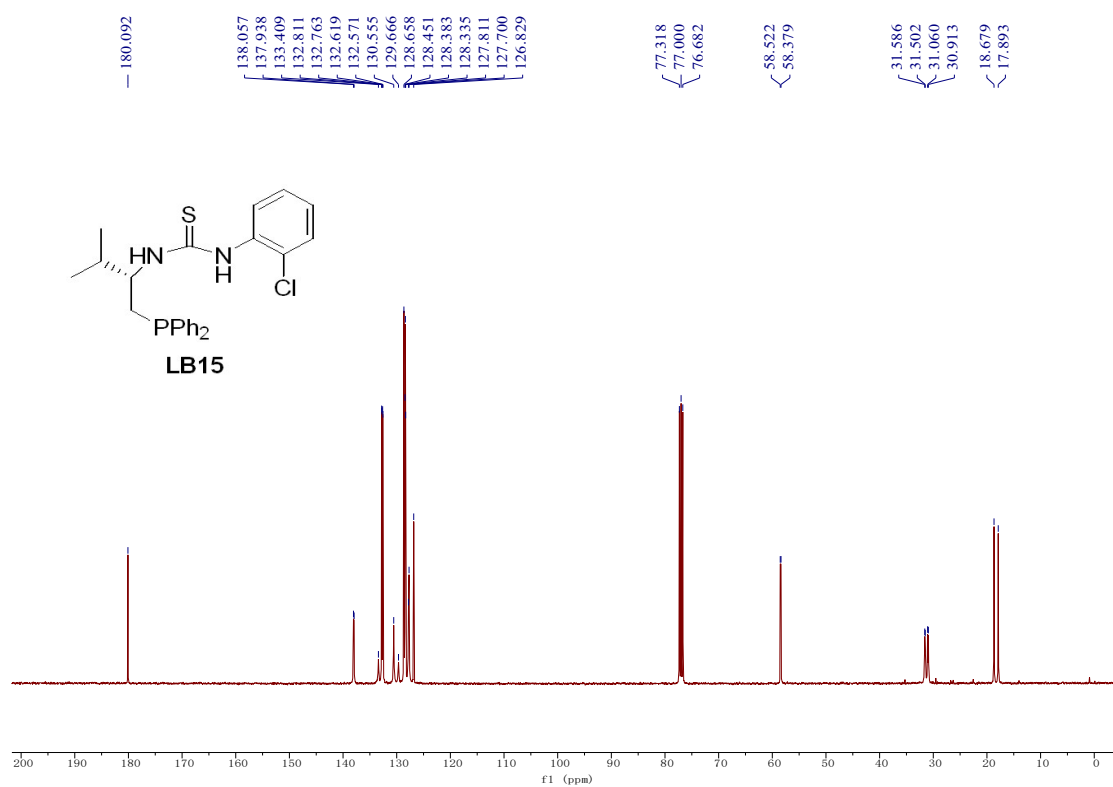

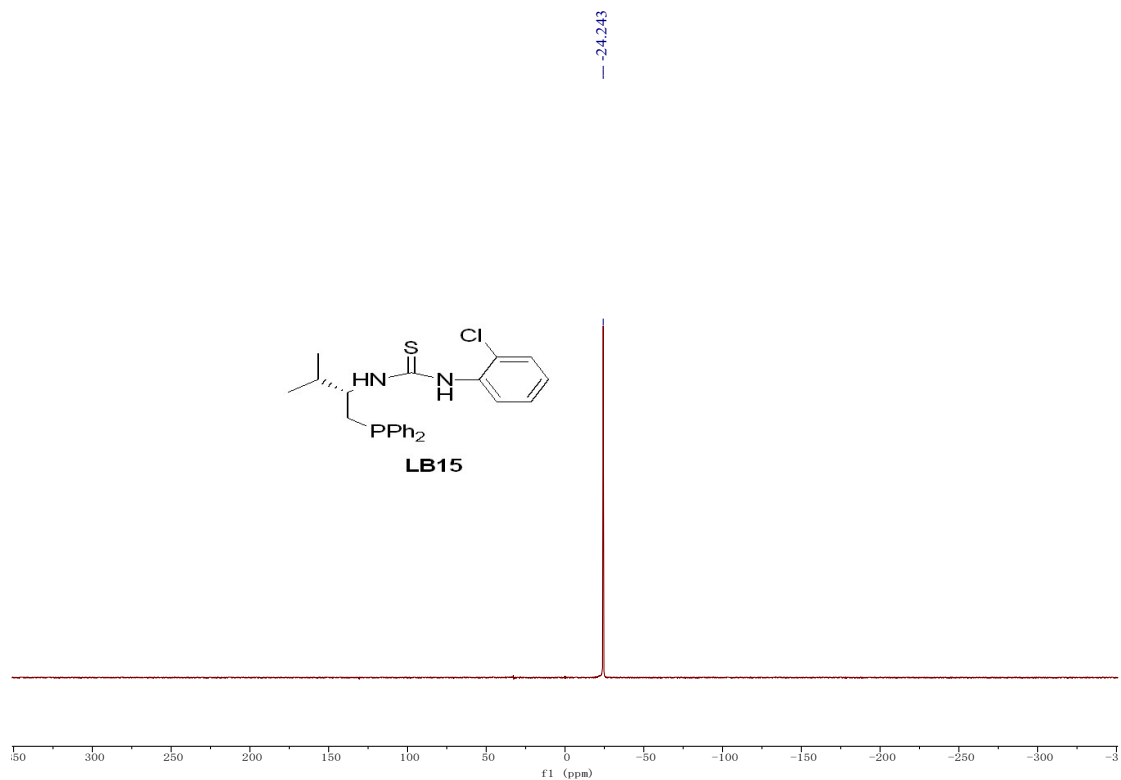

$^1\text{H}$ ,  $^{13}\text{C}$  and  $^{31}\text{P}$  NMR spectra of compound **LB15** (400 MHz,  $\text{CDCl}_3$ )

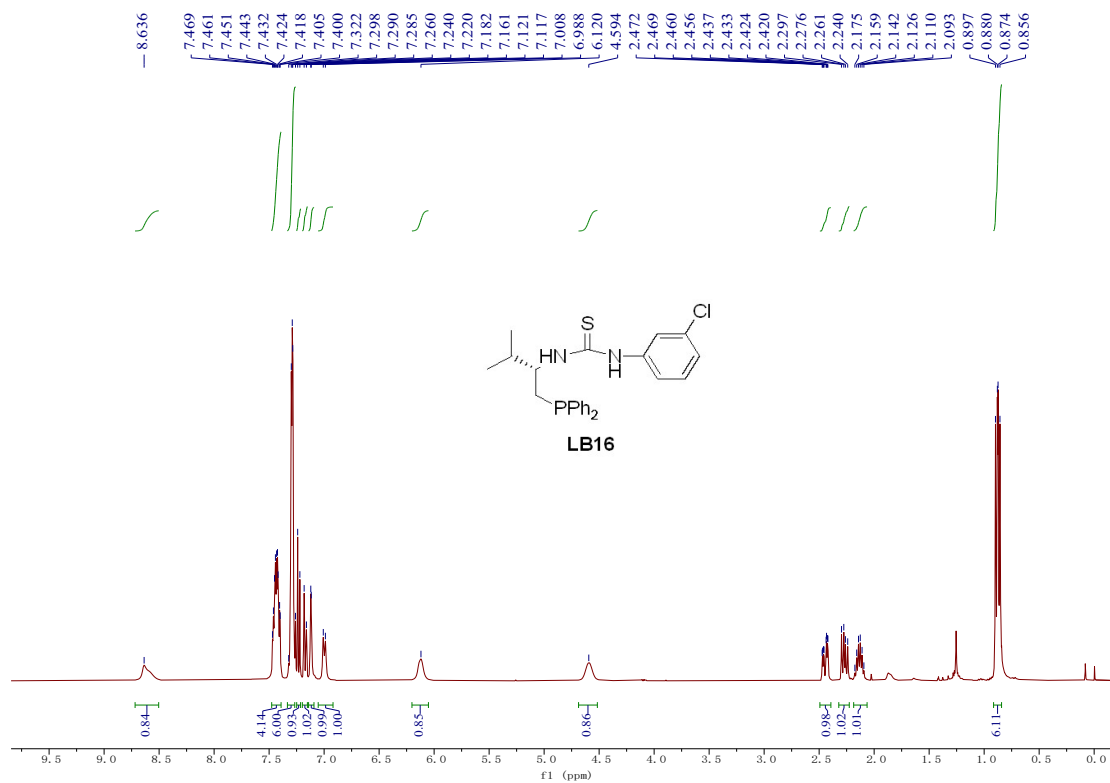

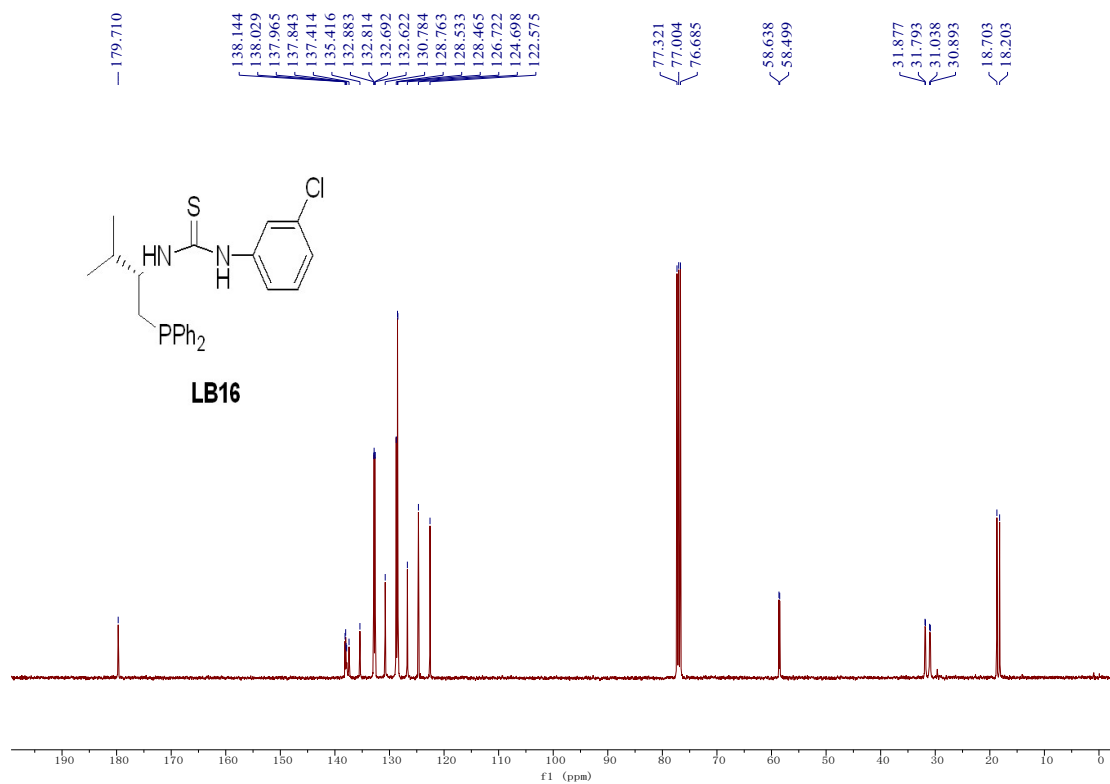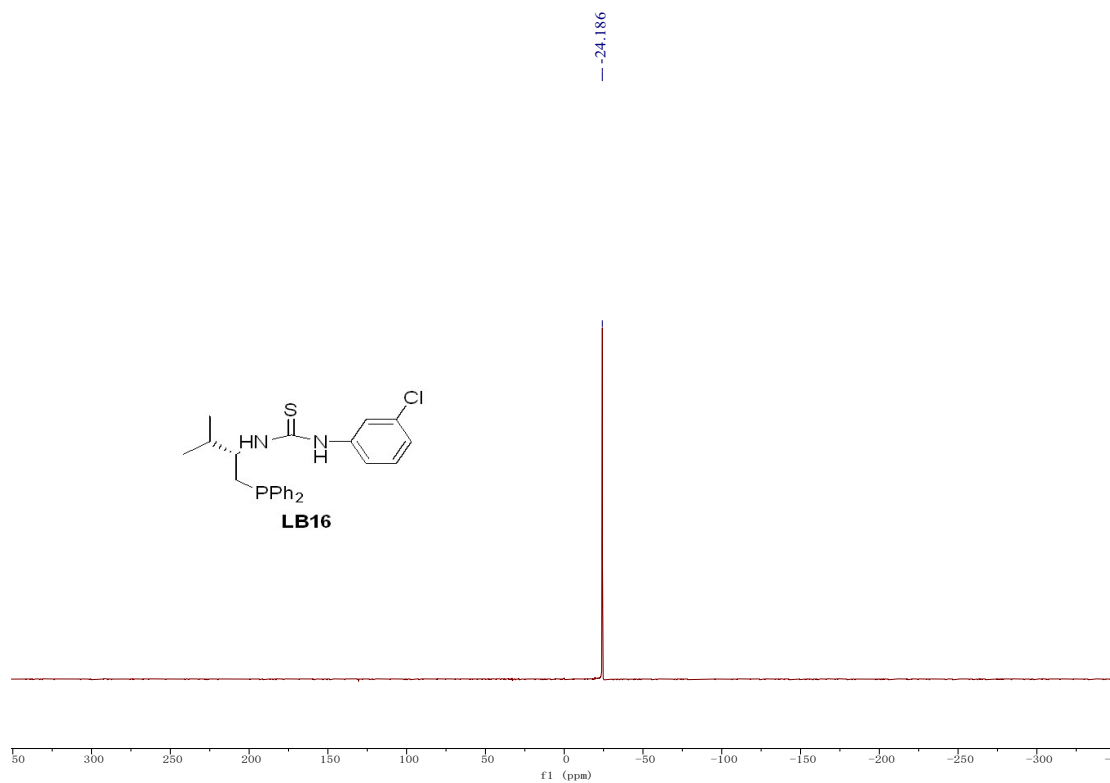

<sup>1</sup>H, <sup>13</sup>C and <sup>31</sup>P NMR spectra of compound **LB16** (400 MHz, CDCl<sub>3</sub>)

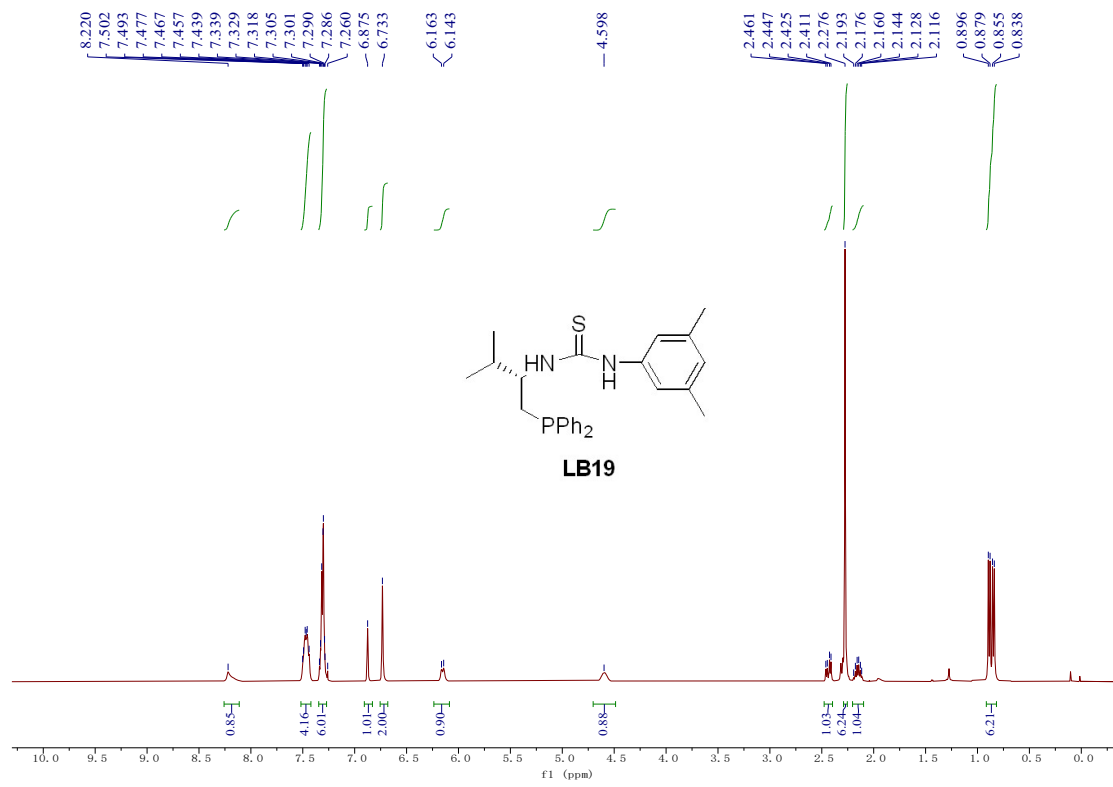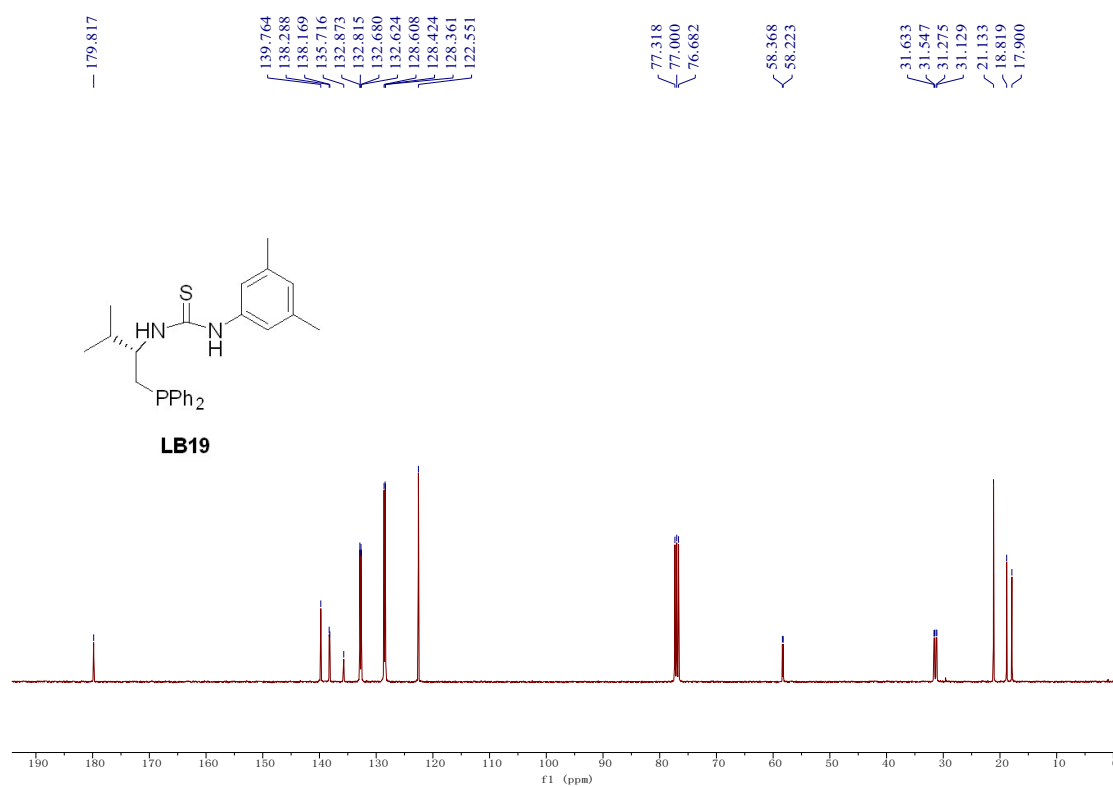

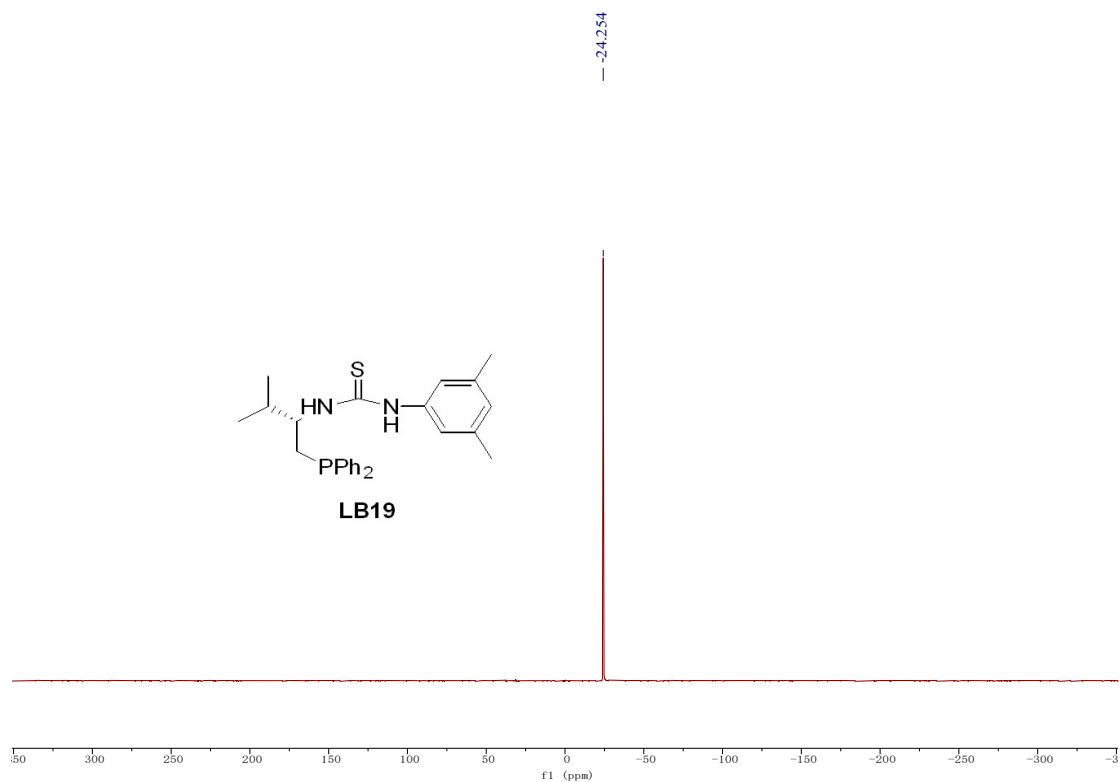

$^1\text{H}$ ,  $^{13}\text{C}$ ,  $^{31}\text{P}$  NMR spectra of compound **LB19** (400 MHz,  $\text{CDCl}_3$ )

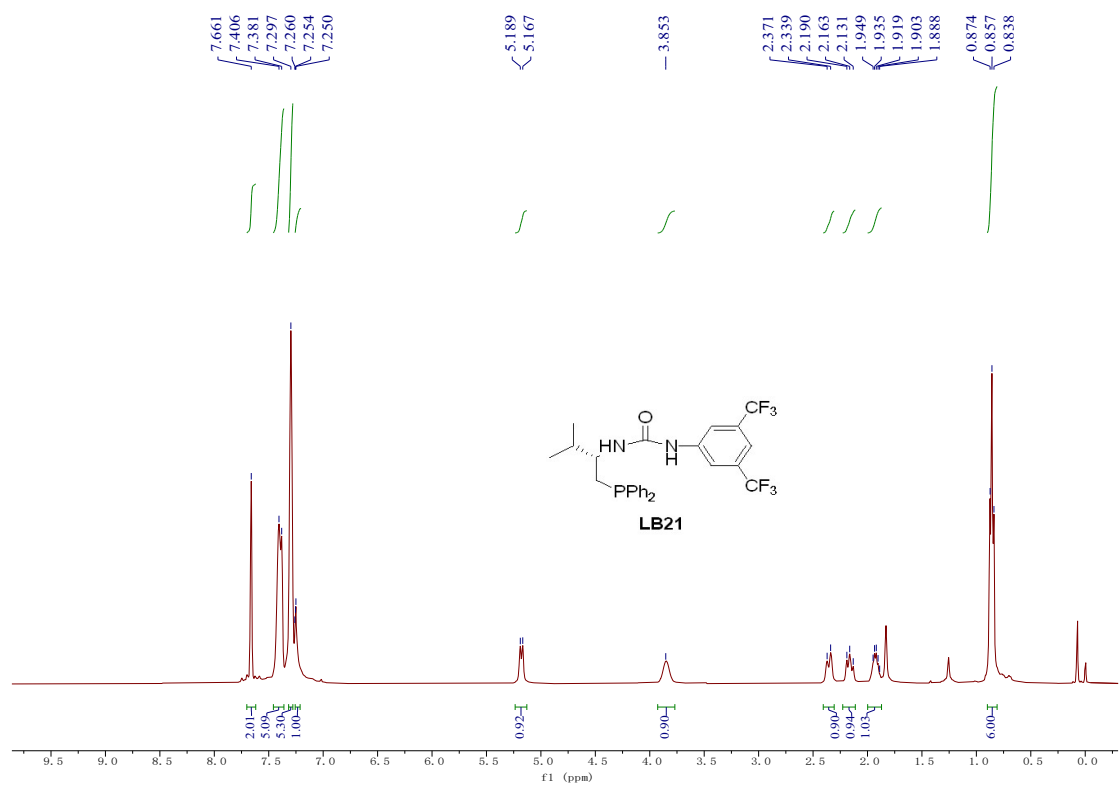

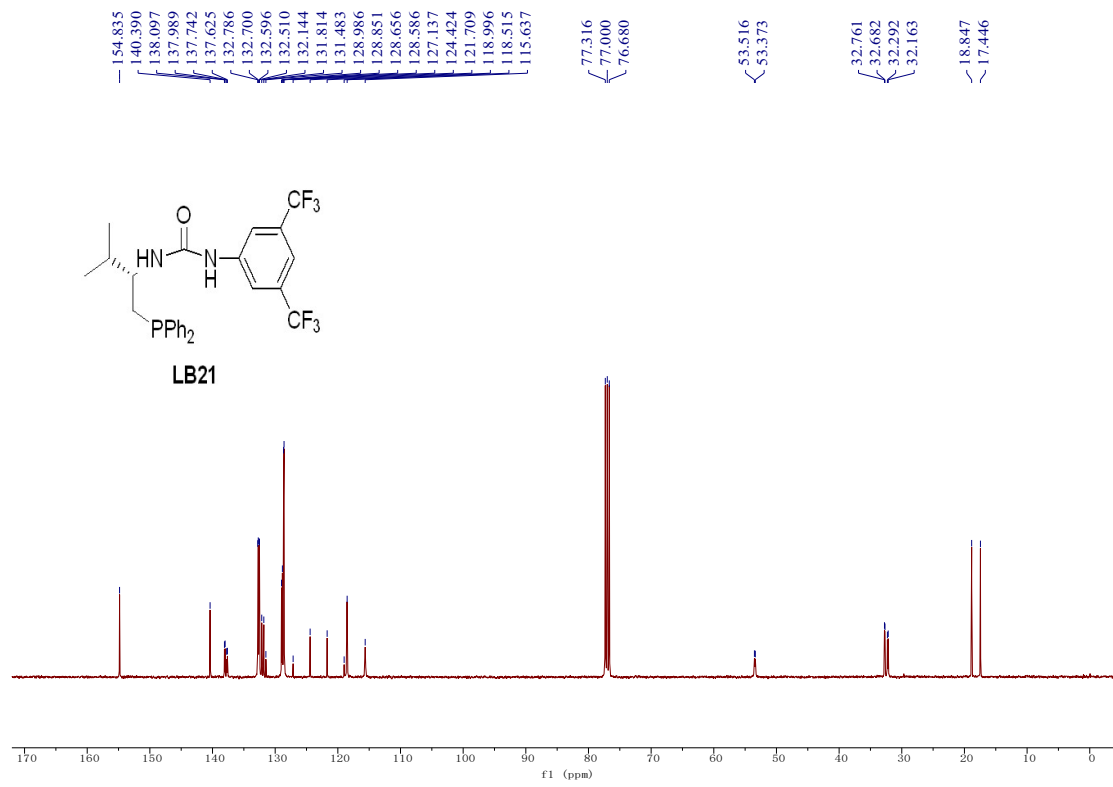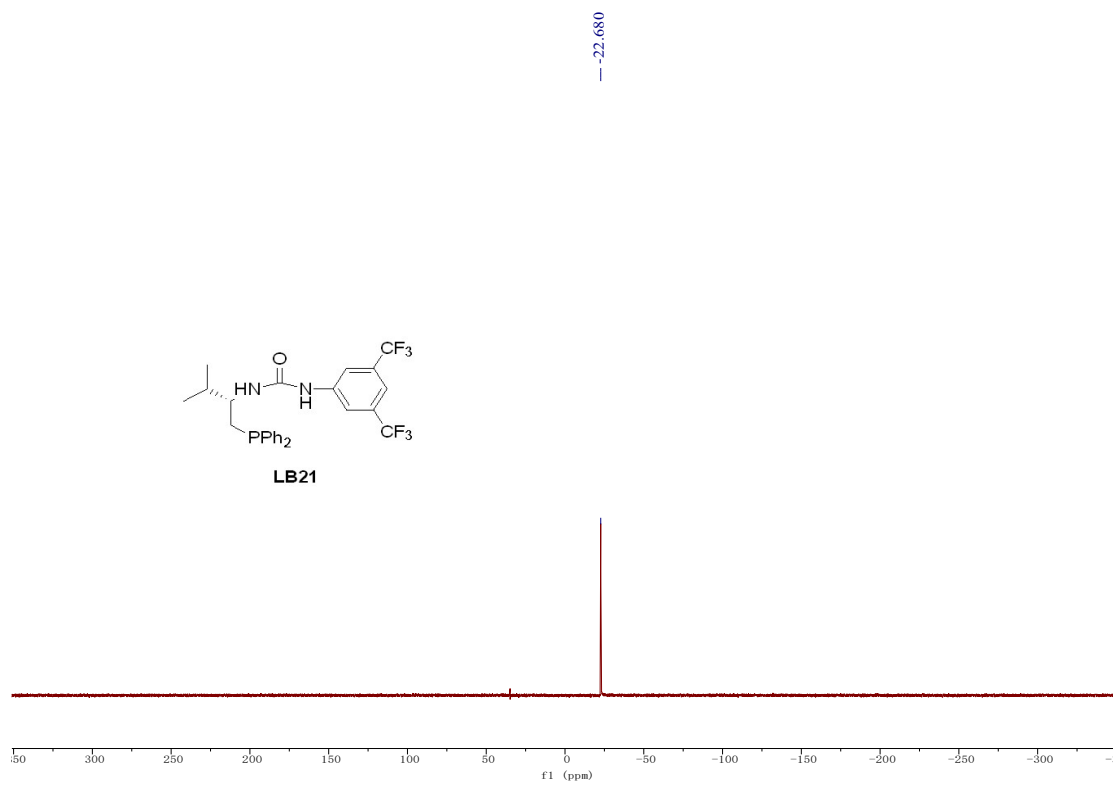

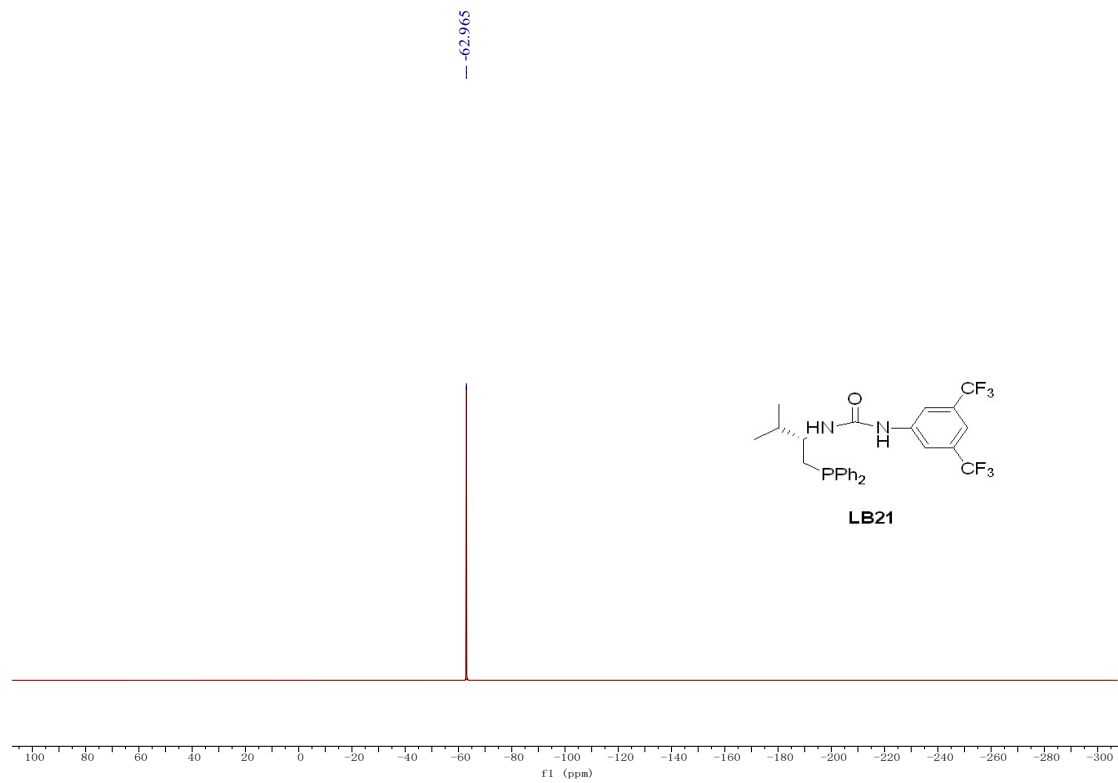

$^1\text{H}$ ,  $^{13}\text{C}$ ,  $^{31}\text{P}$  and  $^{19}\text{F}$  NMR spectra of compound **LB21** (400 MHz,  $\text{CDCl}_3$ )

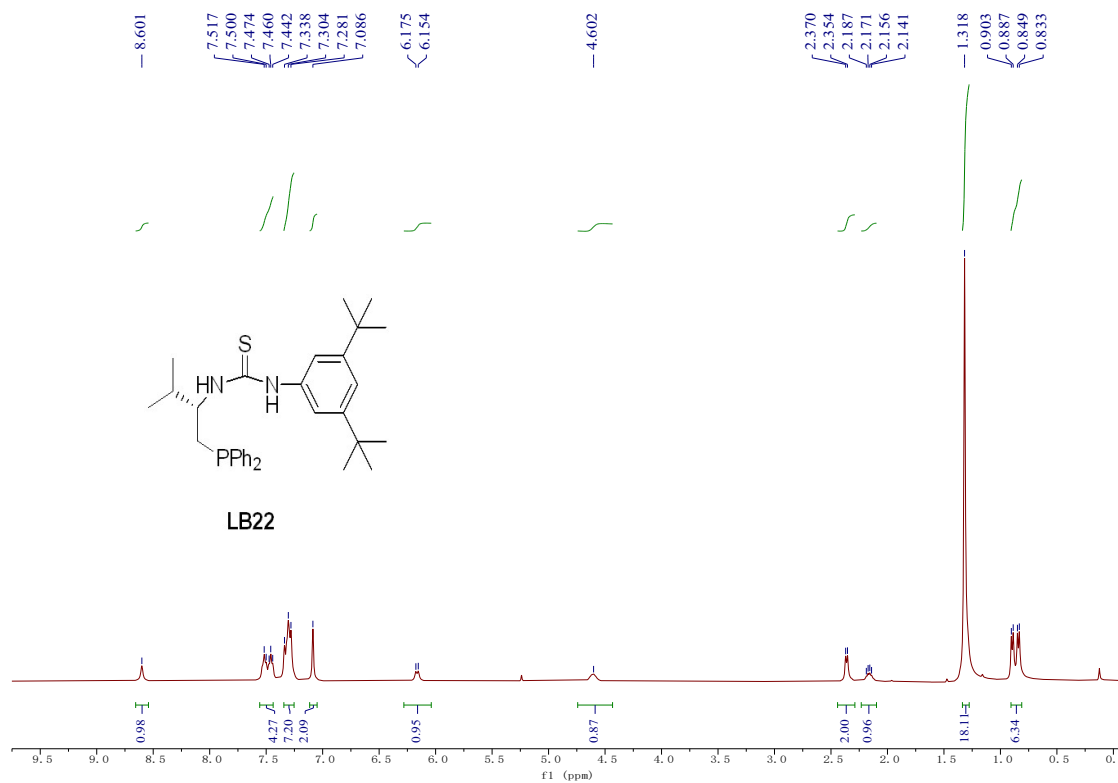



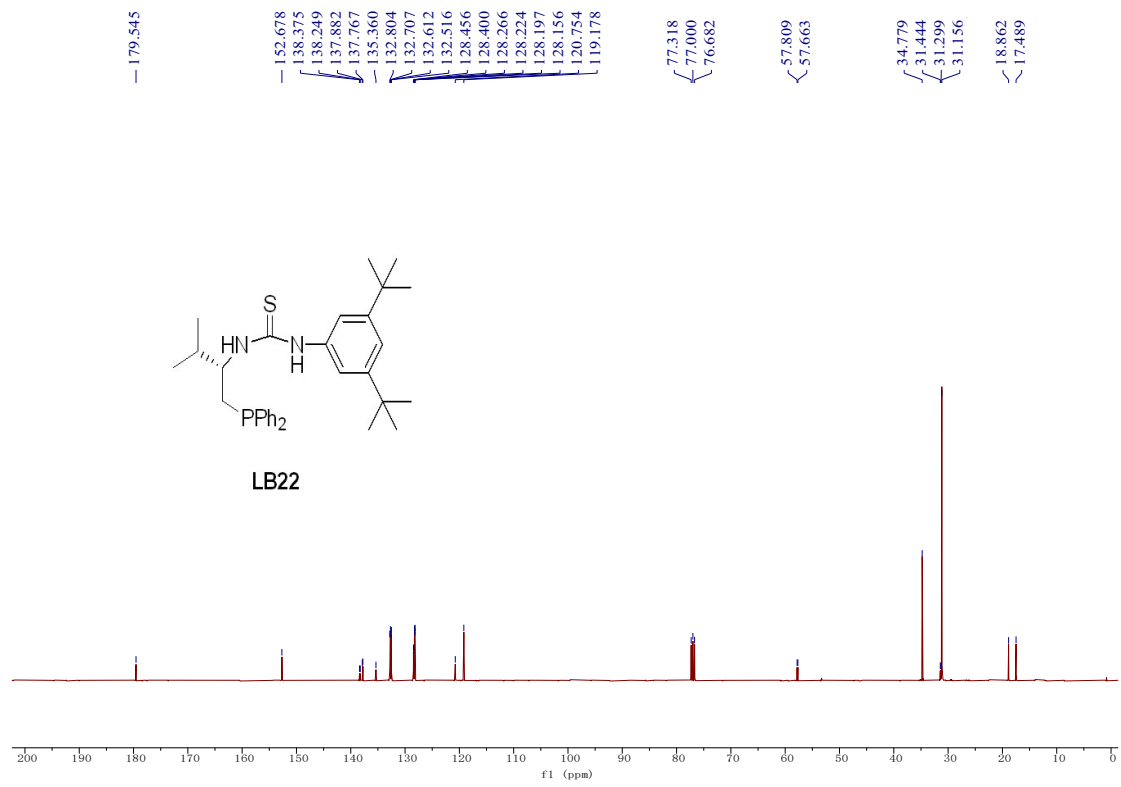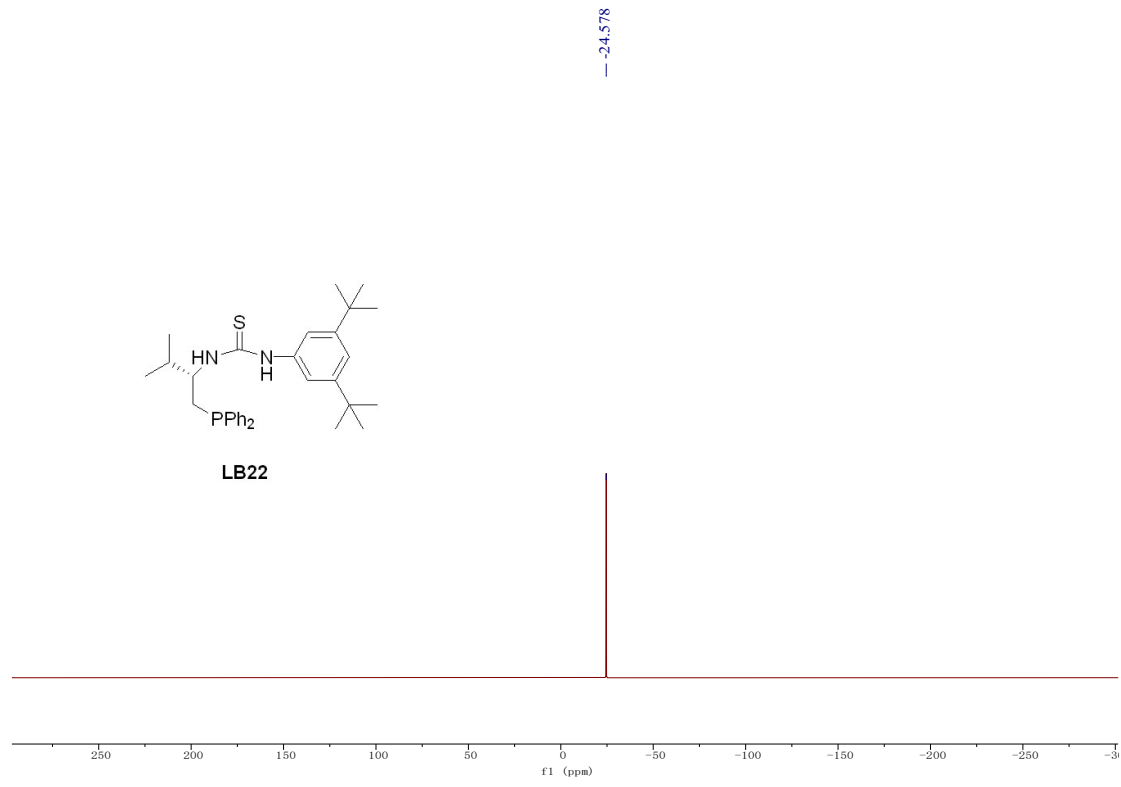

$^1\text{H}$ ,  $^{13}\text{C}$ ,  $^{31}\text{P}$  NMR spectra of compound **LB22** (400 MHz,  $\text{CDCl}_3$ )

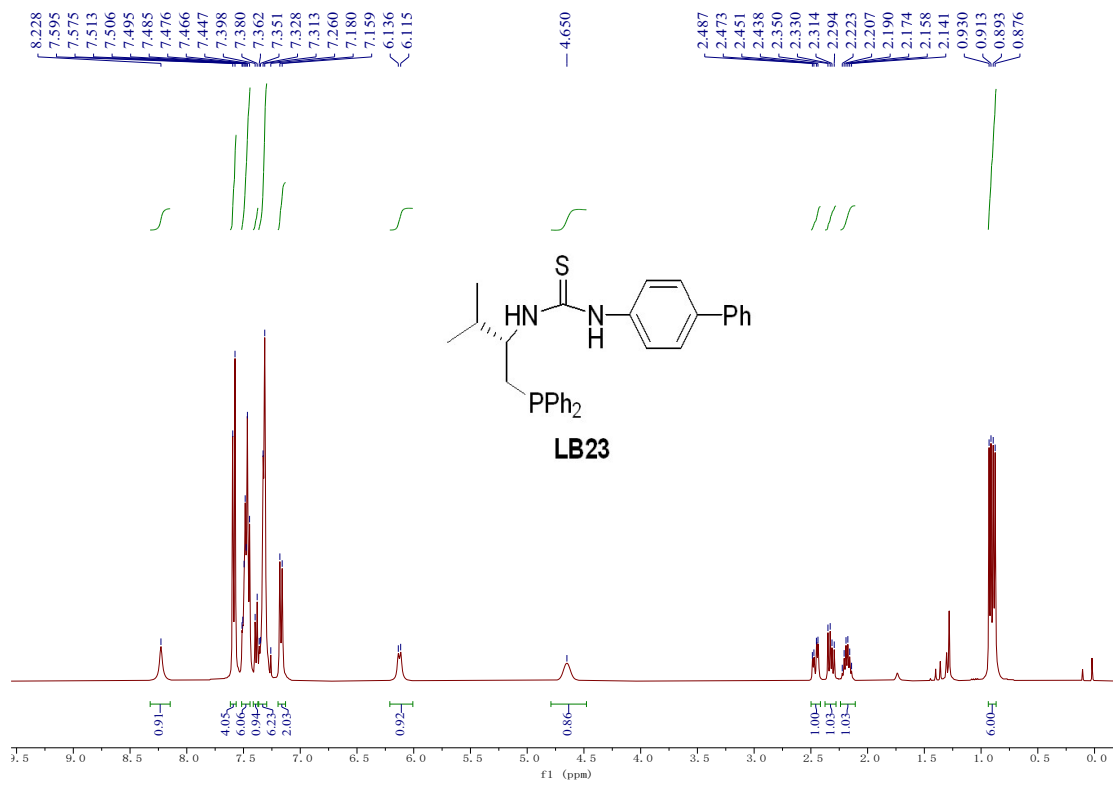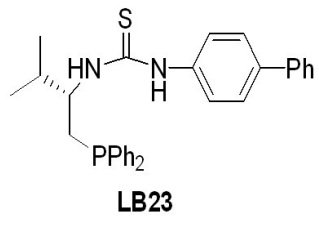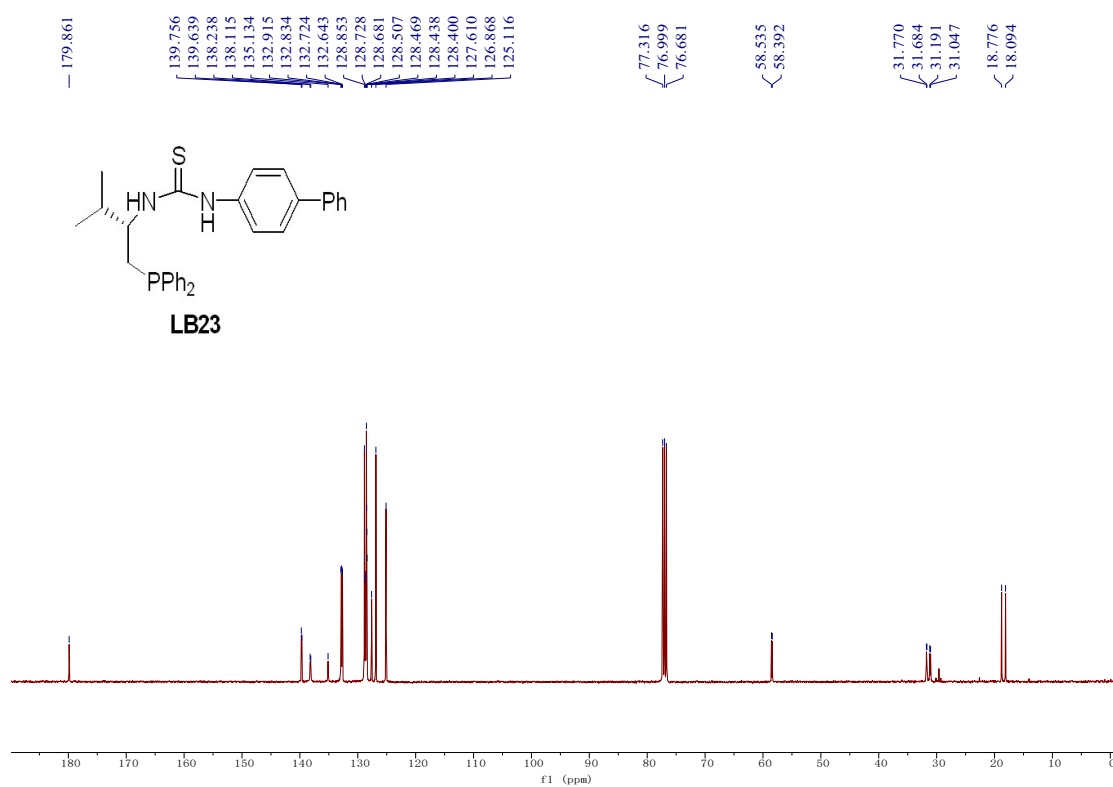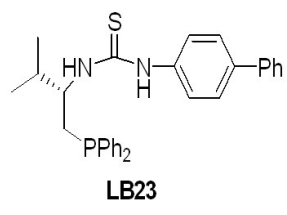

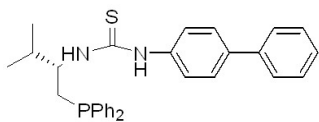

**LB23**

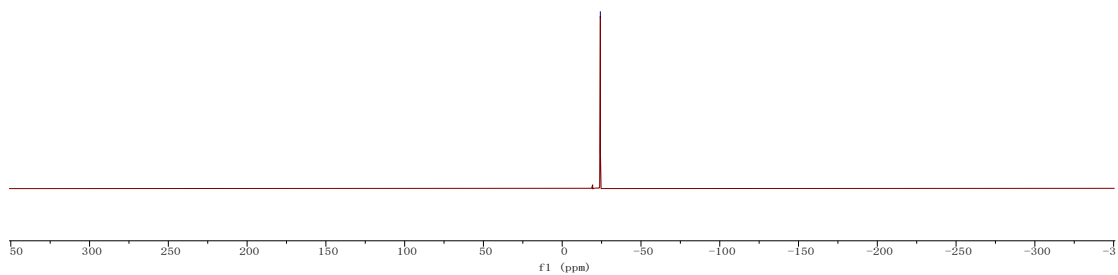

$^1\text{H}$ ,  $^{13}\text{C}$ ,  $^{31}\text{P}$  NMR spectra of compound **LB23** (400 MHz,  $\text{CDCl}_3$ )

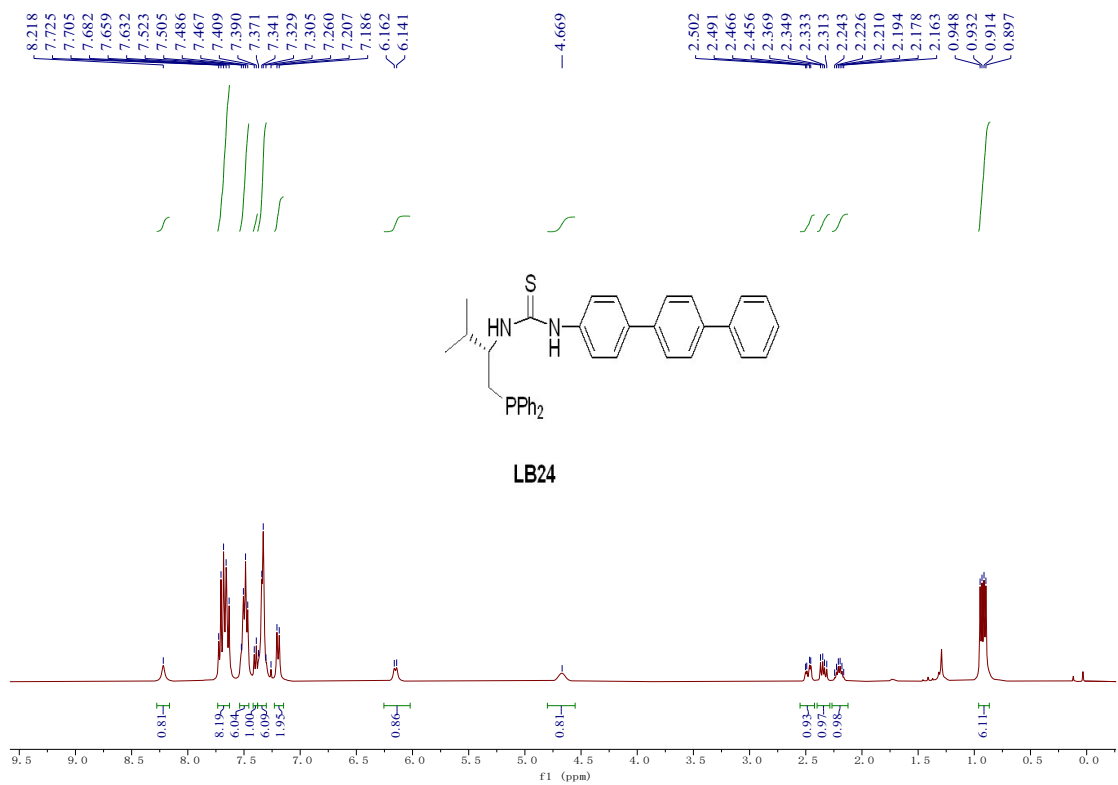

**LB24**

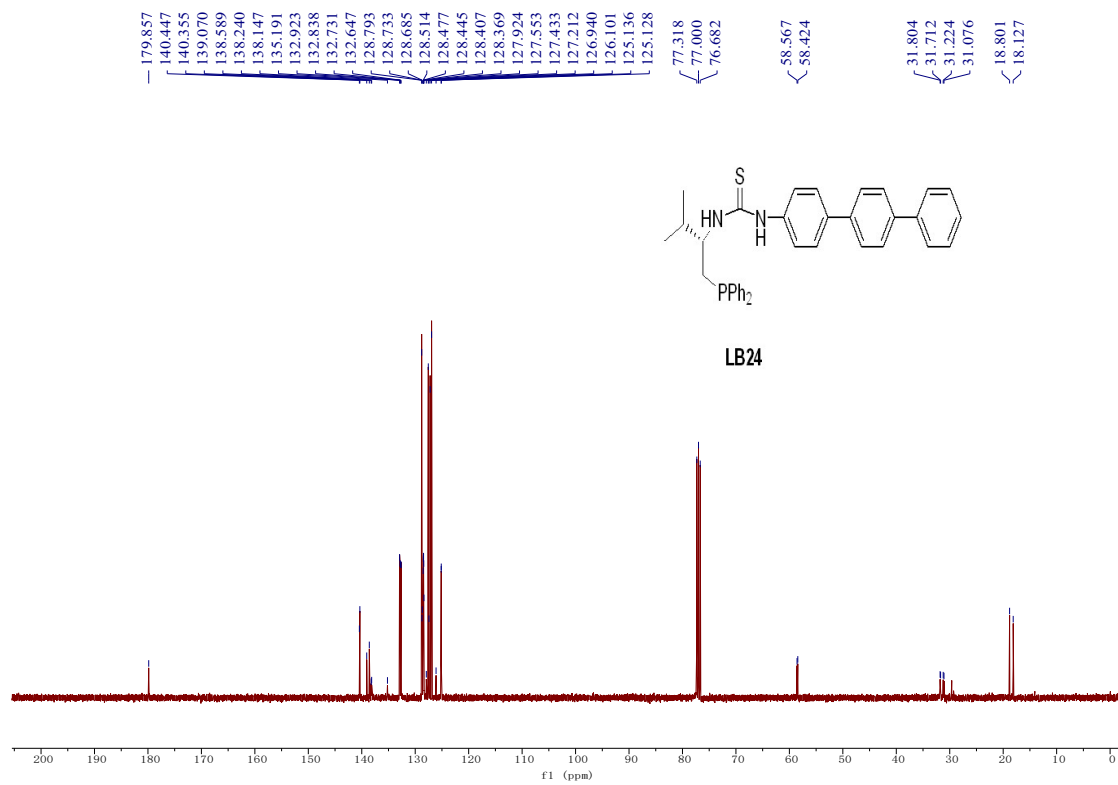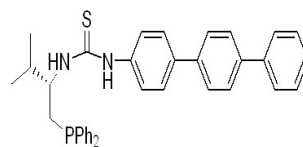

LB24

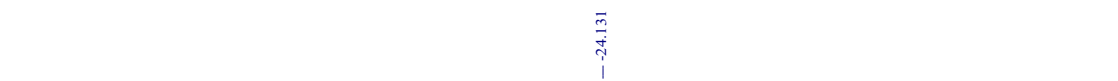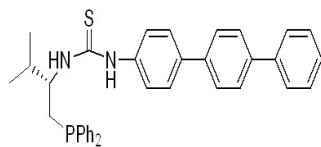

LB24

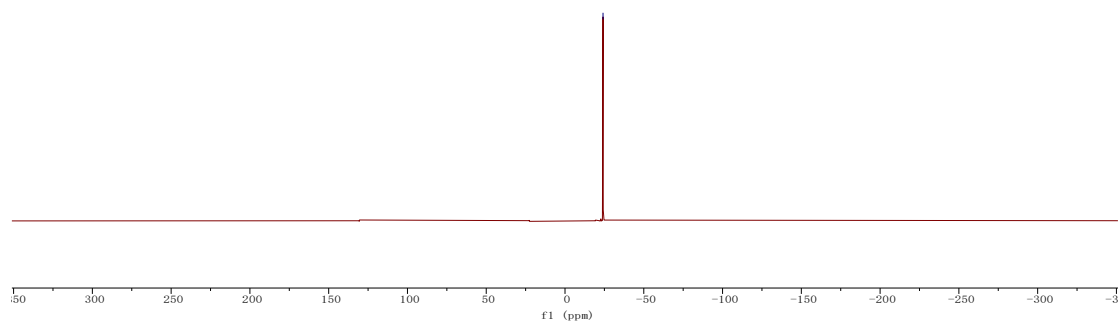

$^1\text{H}$ ,  $^{13}\text{C}$ ,  $^{31}\text{P}$  NMR spectra of compound **LB24** (400 MHz,  $\text{CDCl}_3$ )

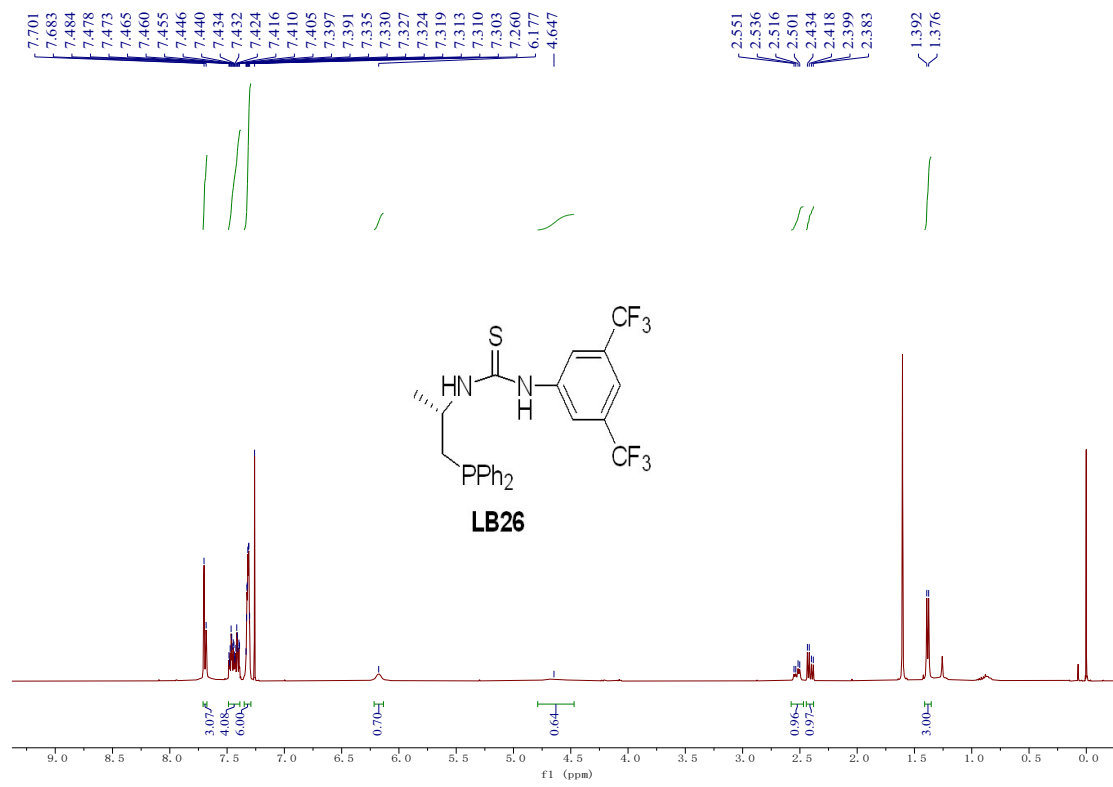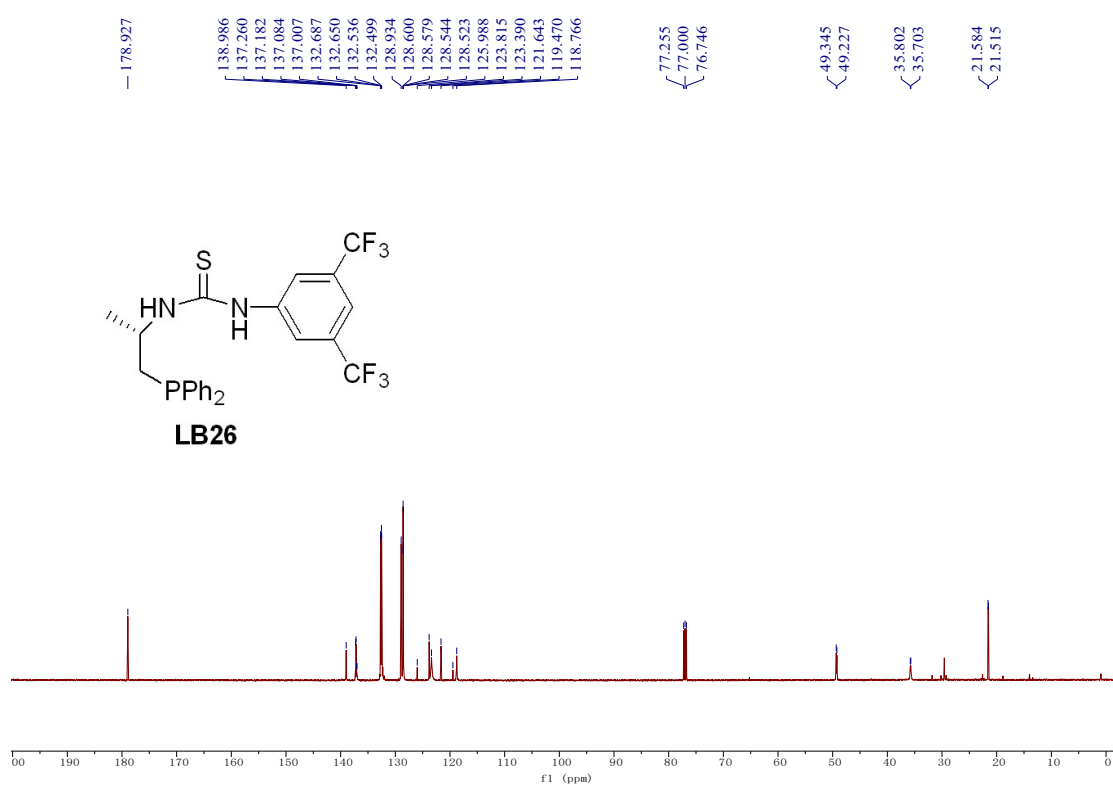

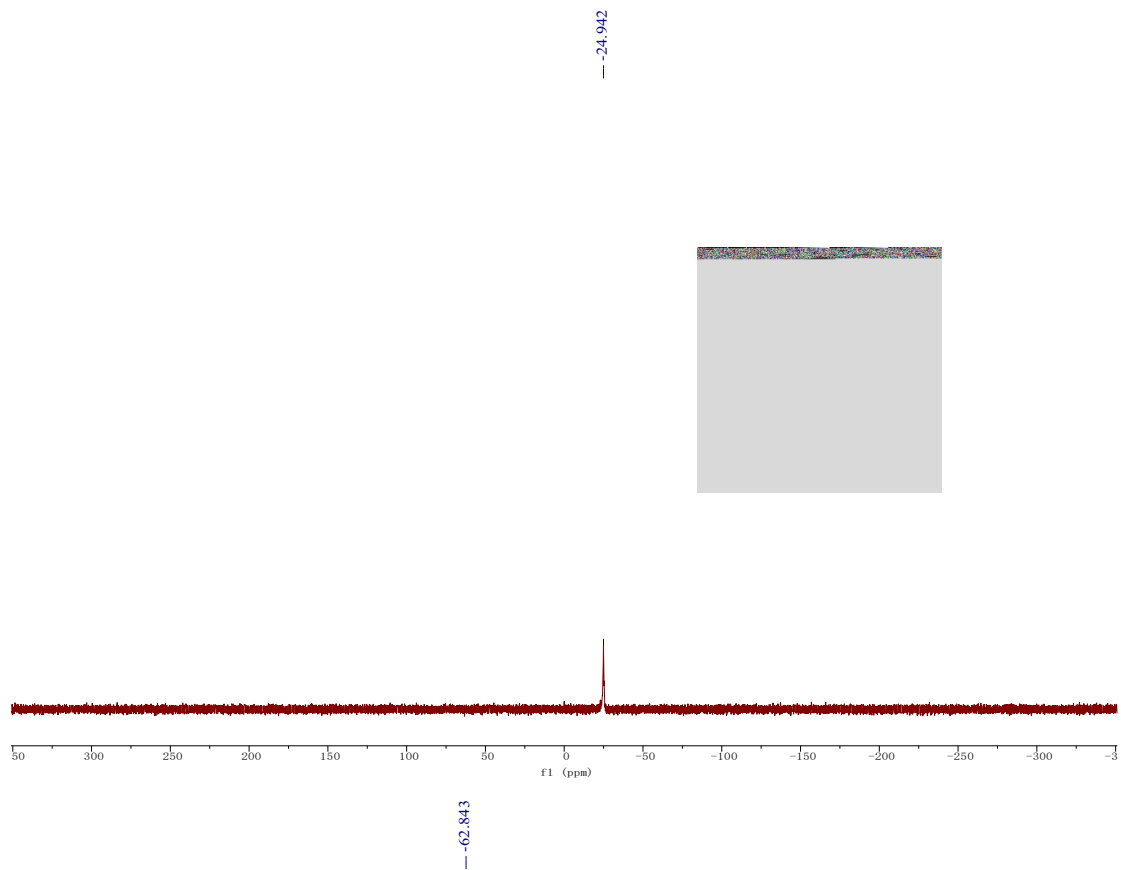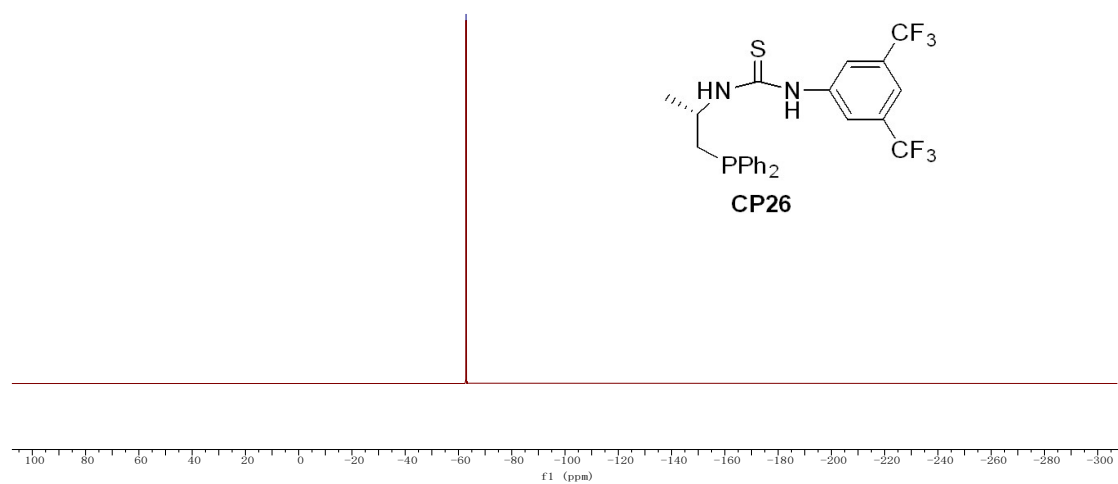

$^1\text{H}$ ,  $^{13}\text{C}$ ,  $^{31}\text{P}$  and  $^{19}\text{F}$  NMR spectra of compound **LB26** (400 MHz,  $\text{CDCl}_3$ )

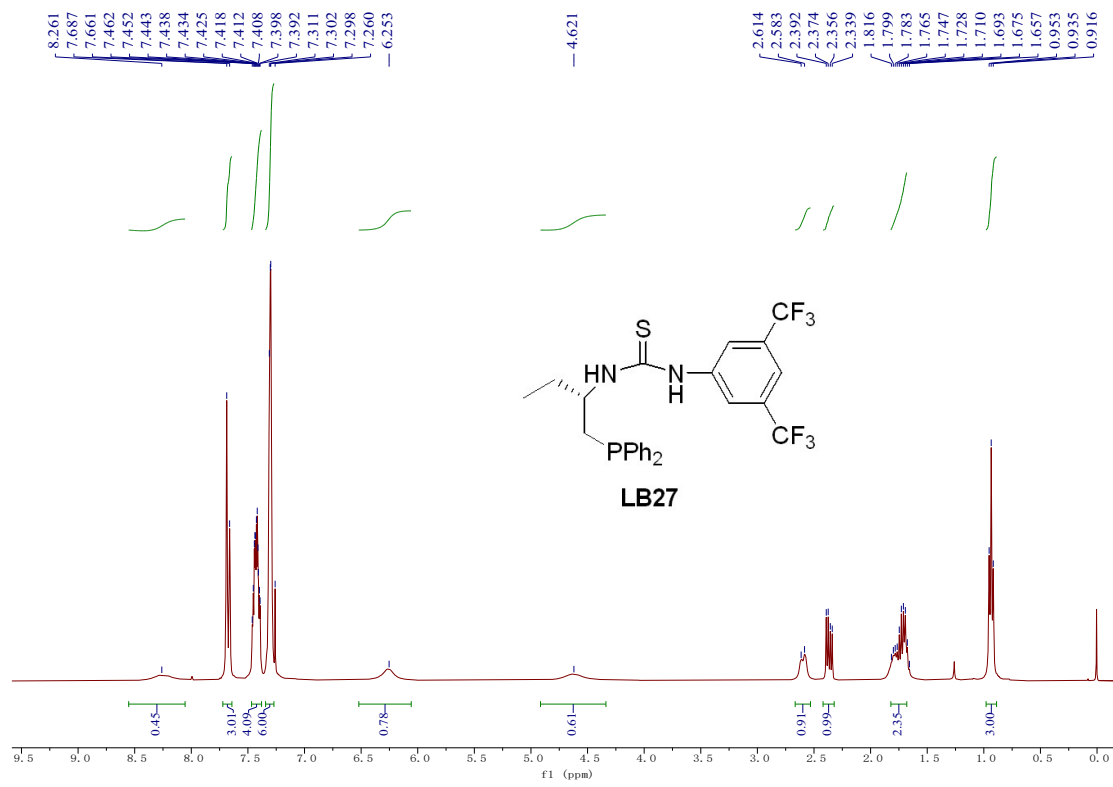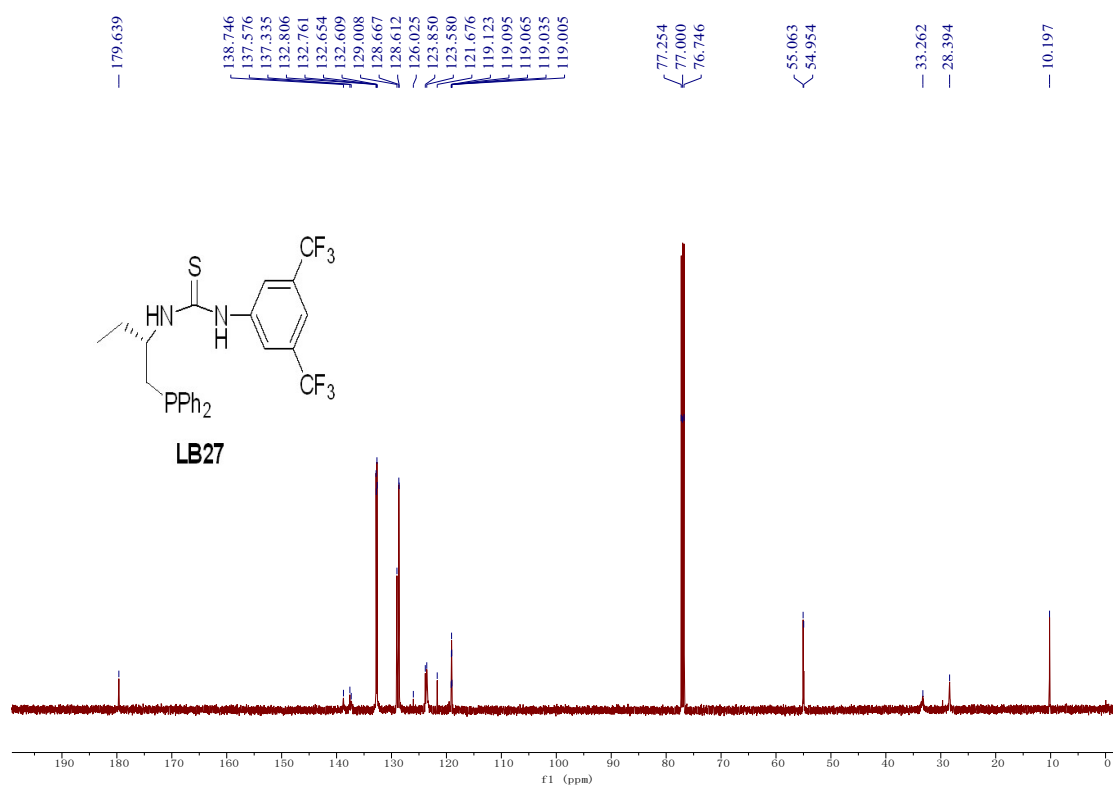

-25.244

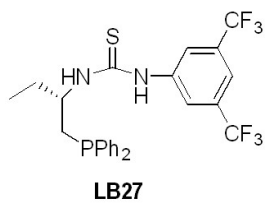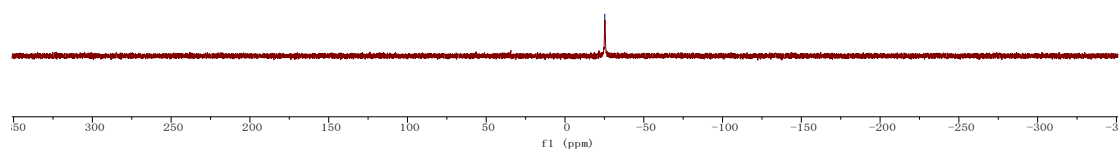

-62.870

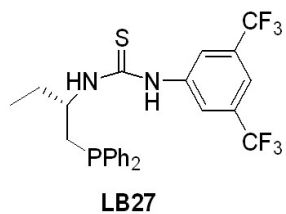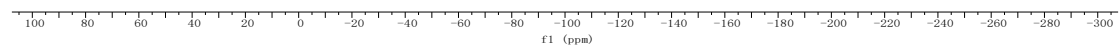

<sup>1</sup>H, <sup>13</sup>C, <sup>31</sup>P and <sup>19</sup>F NMR spectra of compound **LB27** (400 MHz, CDCl<sub>3</sub>)



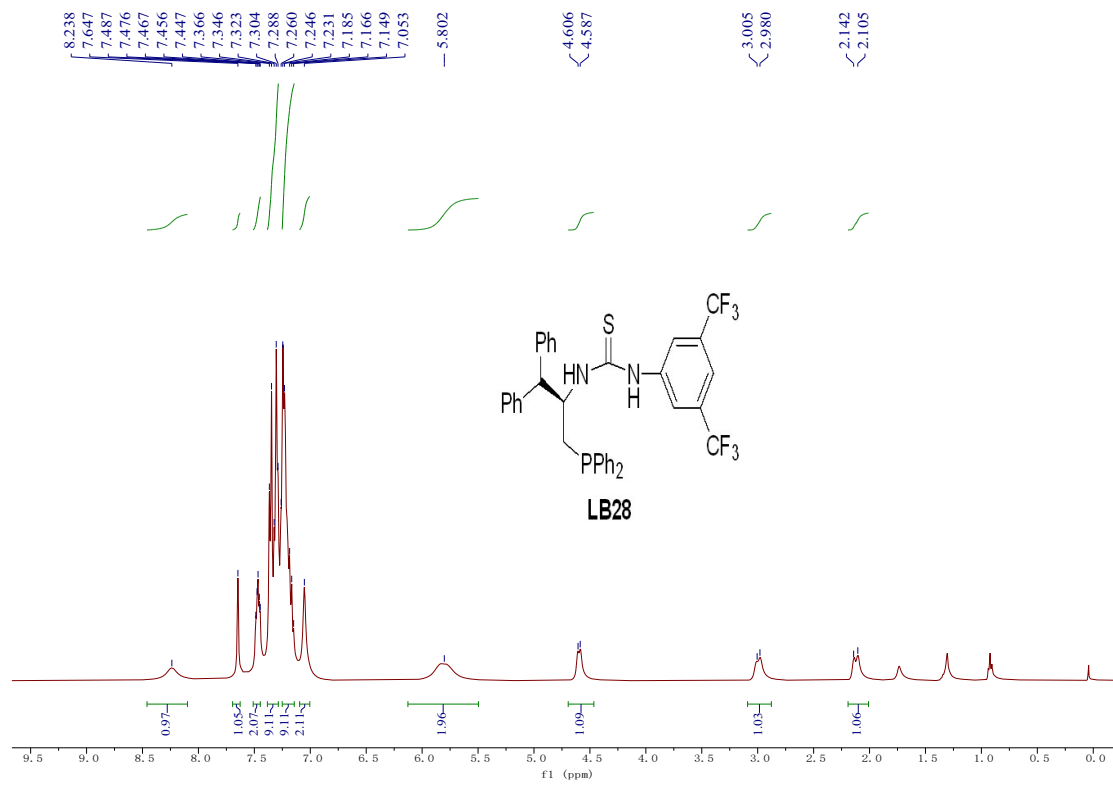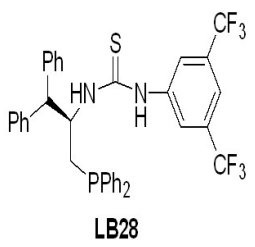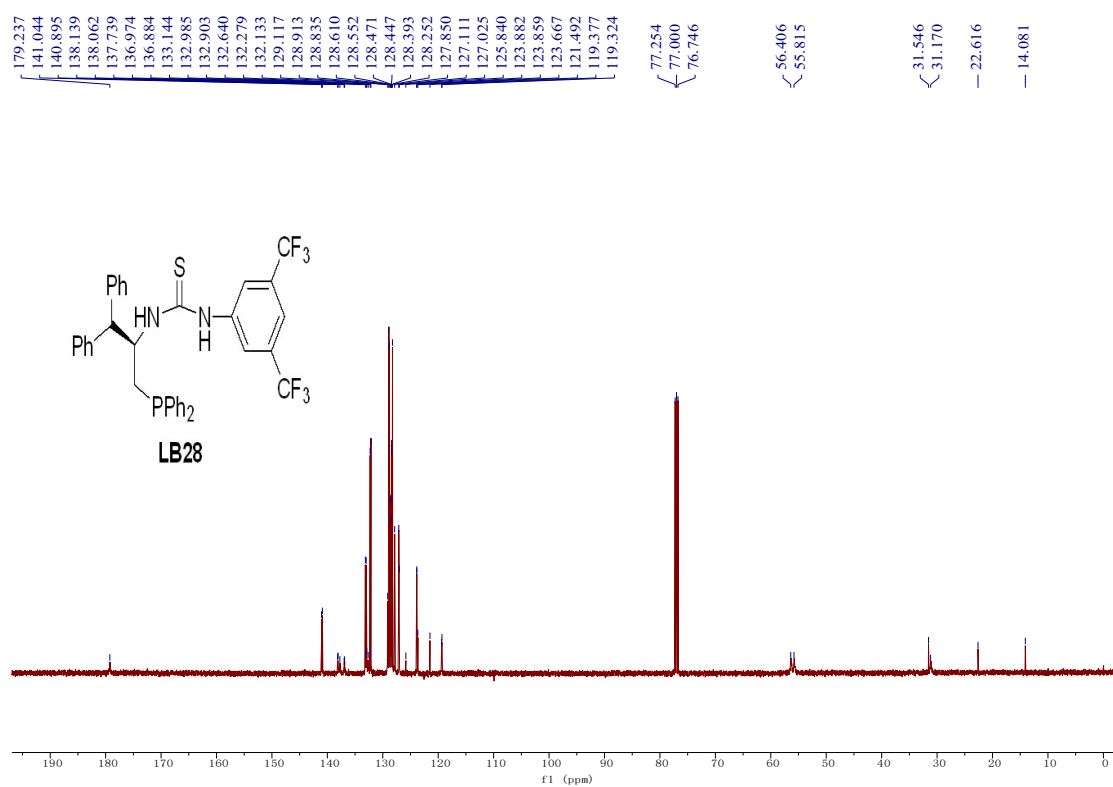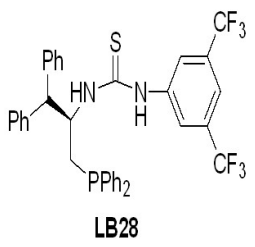

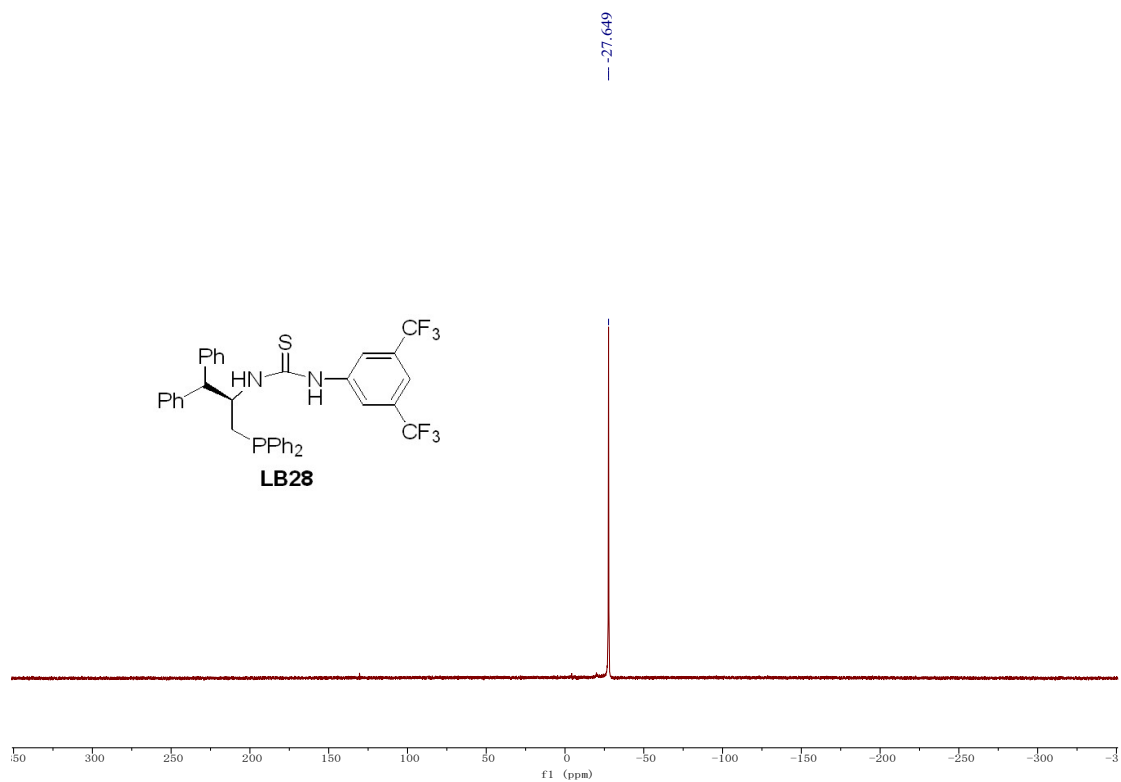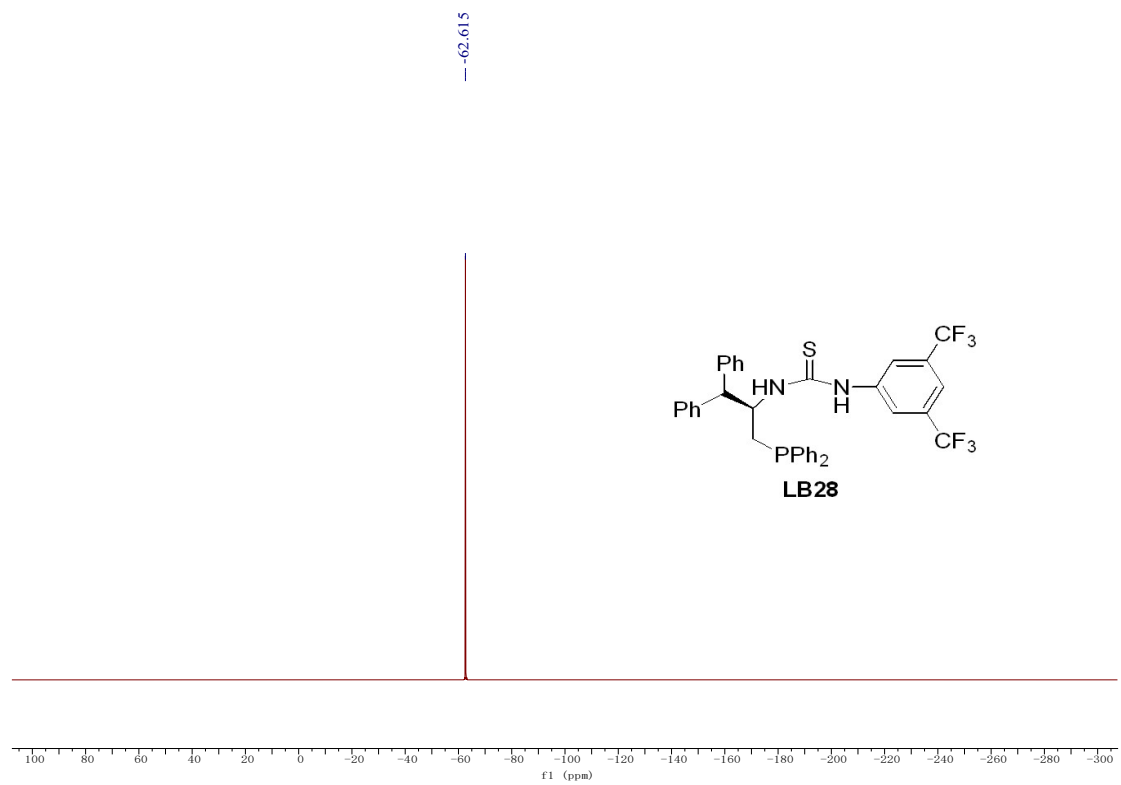

$^1\text{H}$ ,  $^{13}\text{C}$ ,  $^{31}\text{P}$  and  $^{19}\text{F}$  NMR spectra of compound **LB28** (400 MHz,  $\text{CDCl}_3$ )

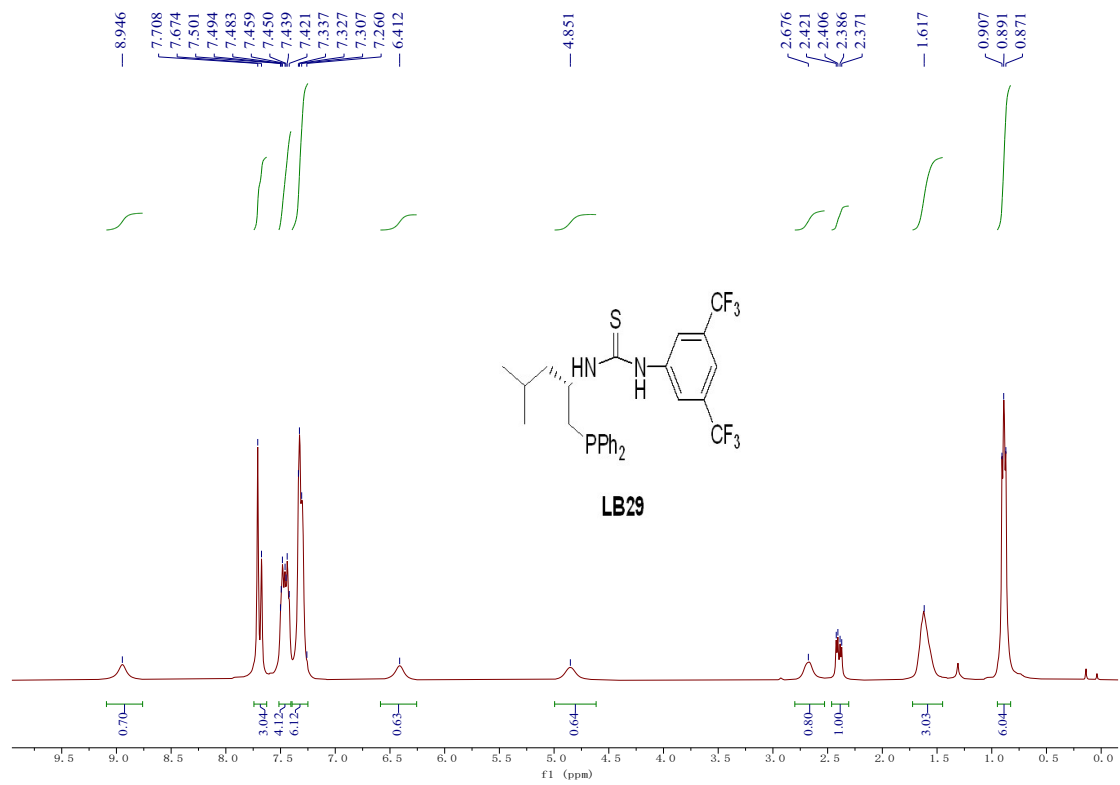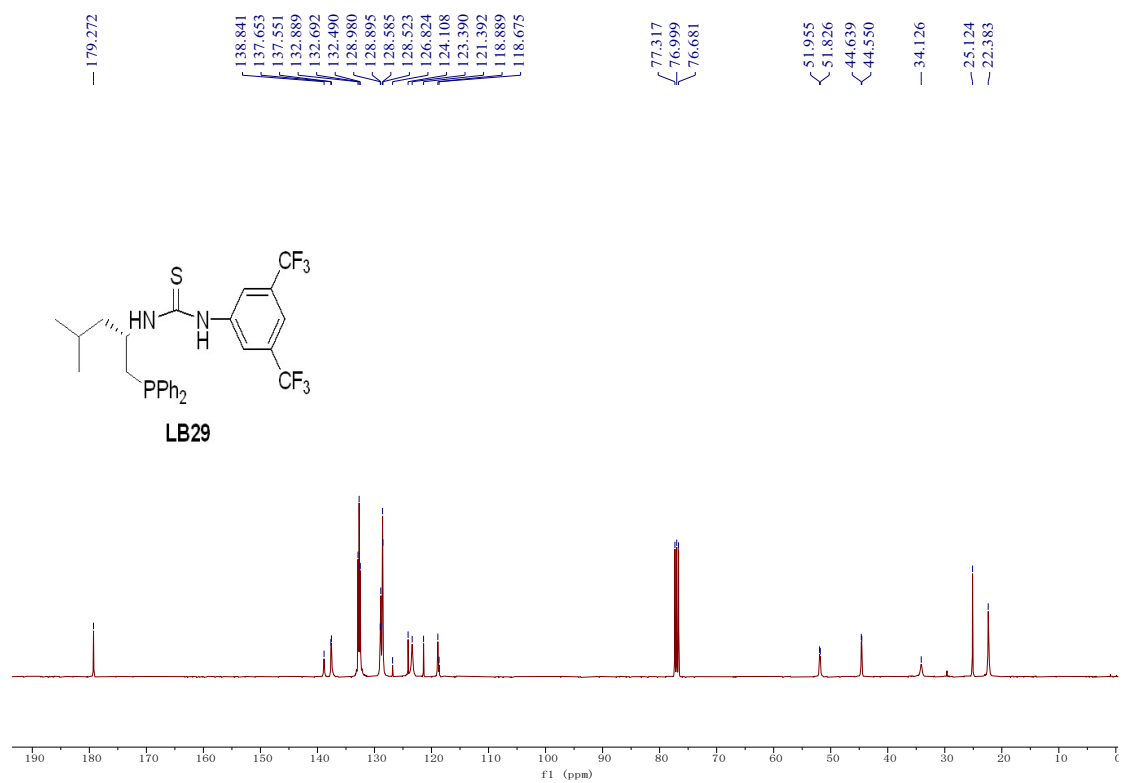

-25.355

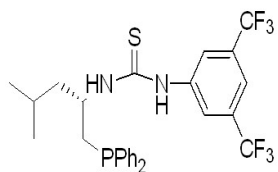

**LB29**

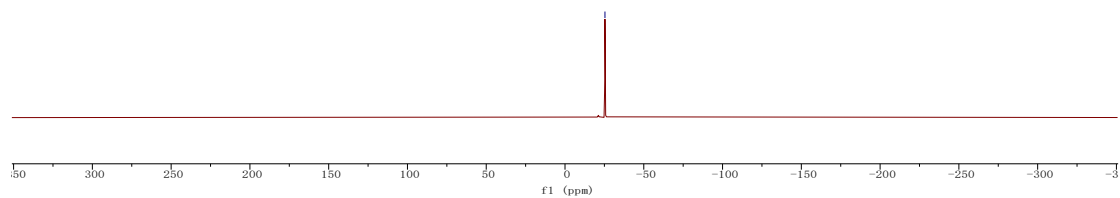

-62.878

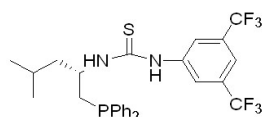

**LB29**

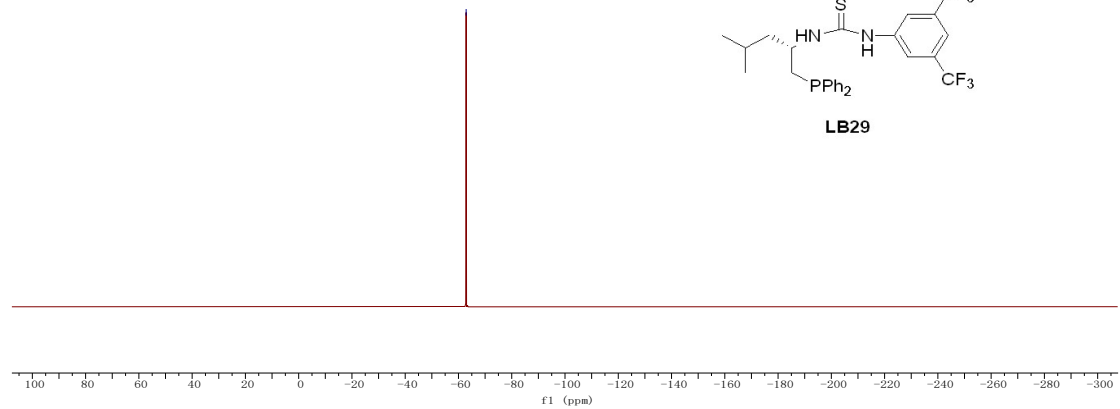

$^1\text{H}$ ,  $^{13}\text{C}$ ,  $^{31}\text{P}$  and  $^{19}\text{F}$  NMR spectra of compound **LB29** (400 MHz,  $\text{CDCl}_3$ )

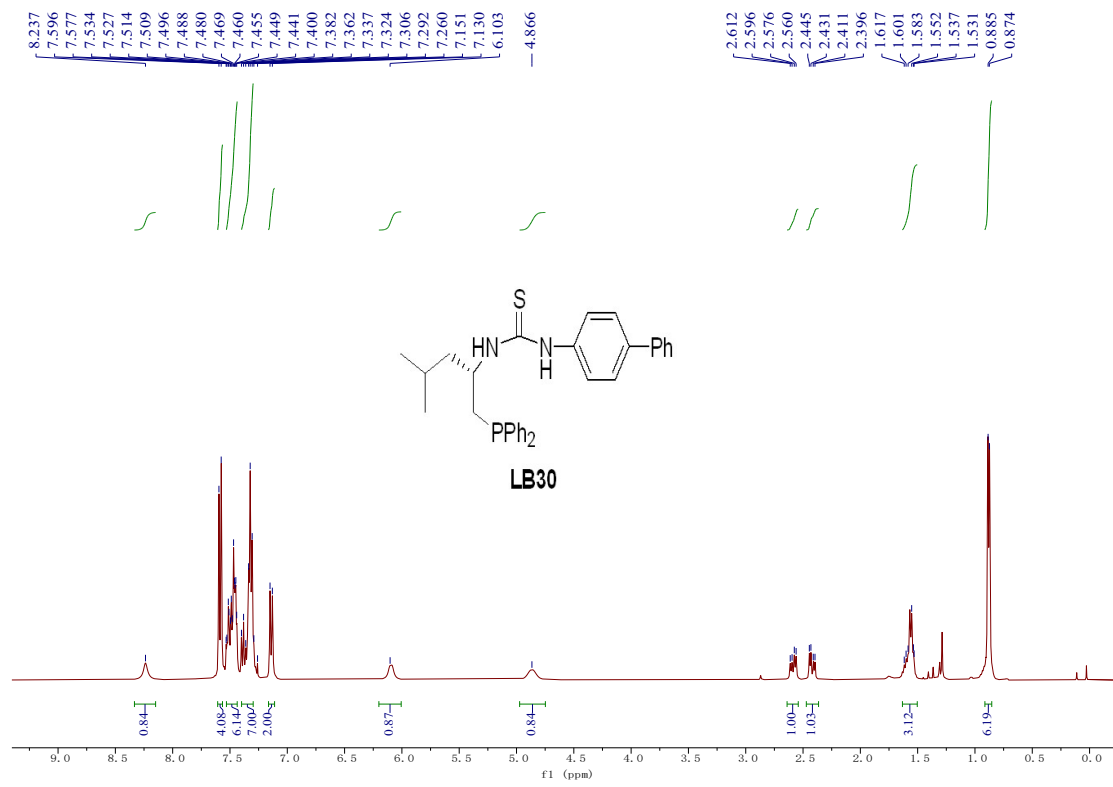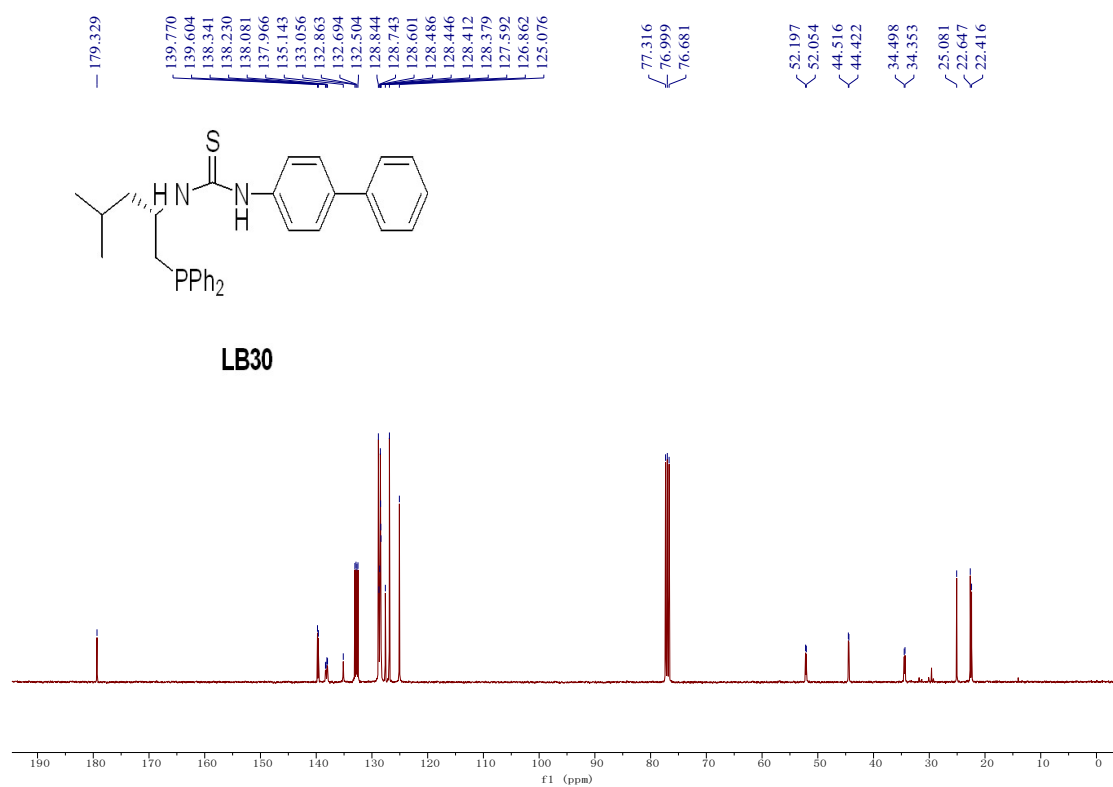

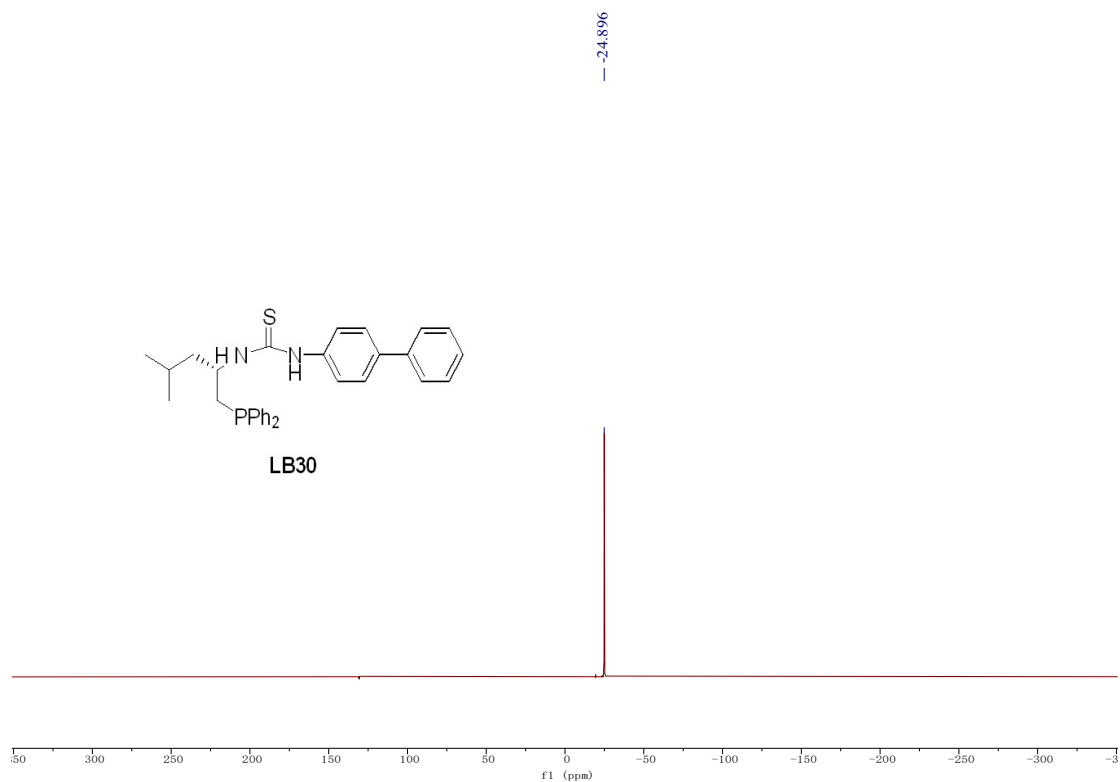

$^1\text{H}$ ,  $^{13}\text{C}$  and  $^{31}\text{P}$  NMR spectra of compound **LB30** (400 MHz,  $\text{CDCl}_3$ )

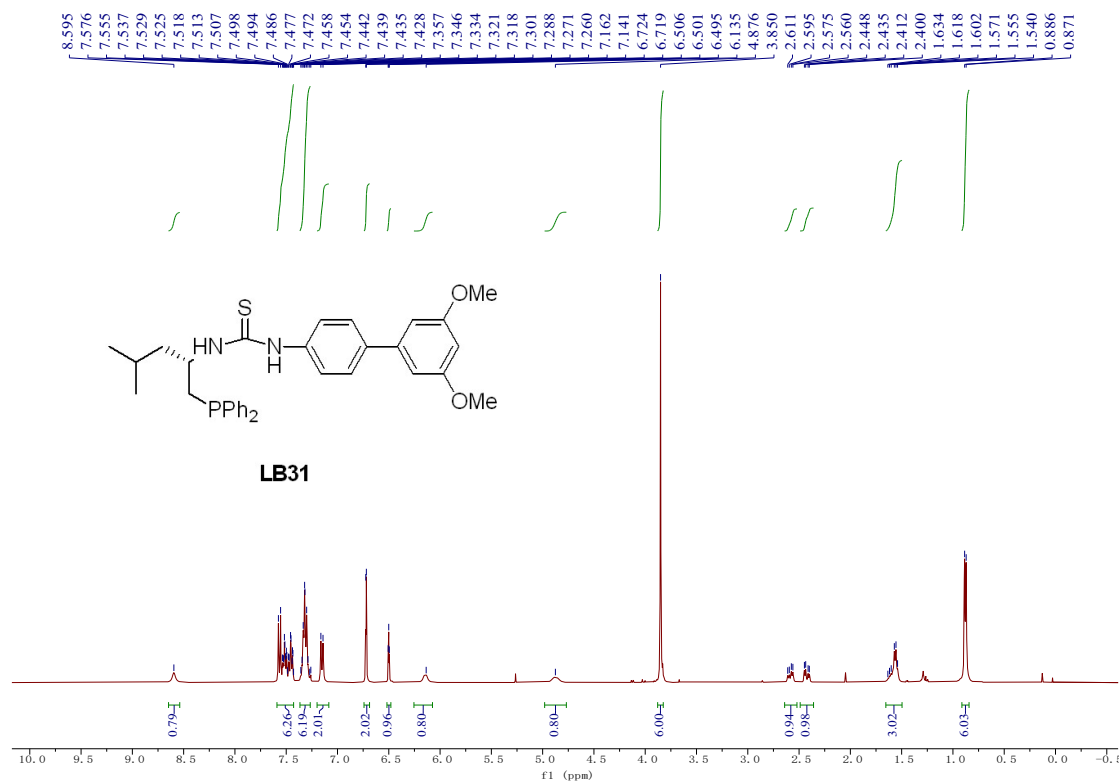

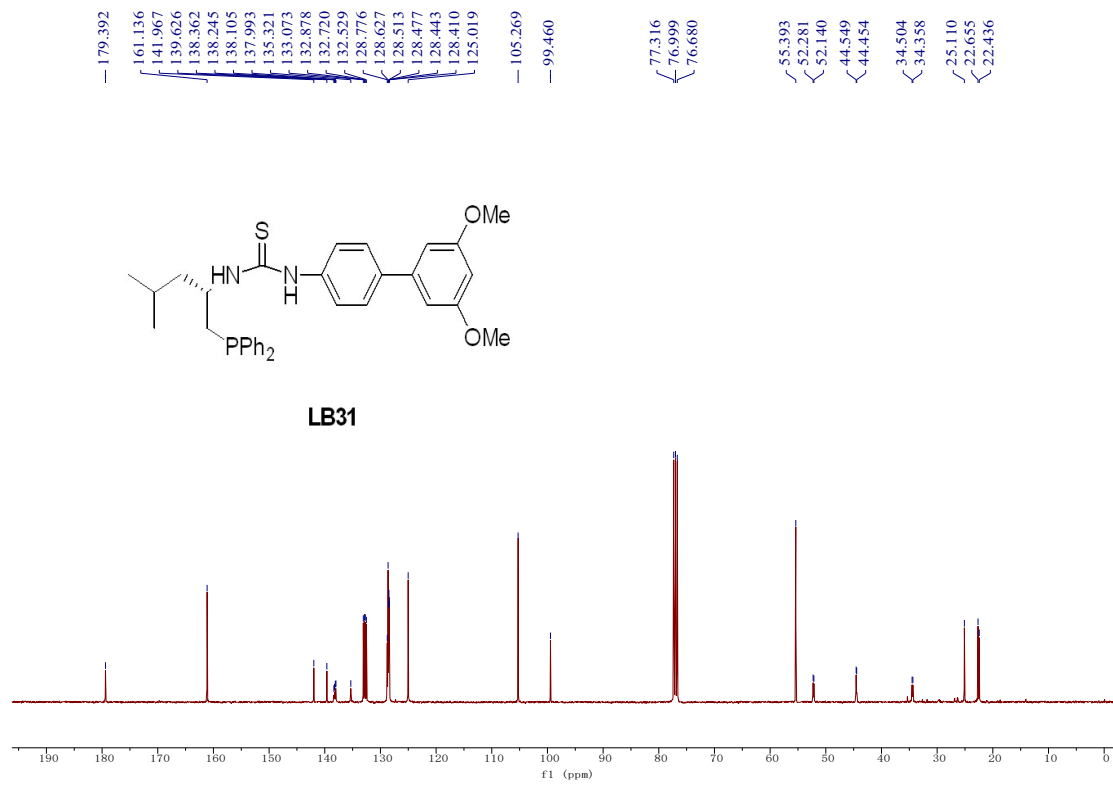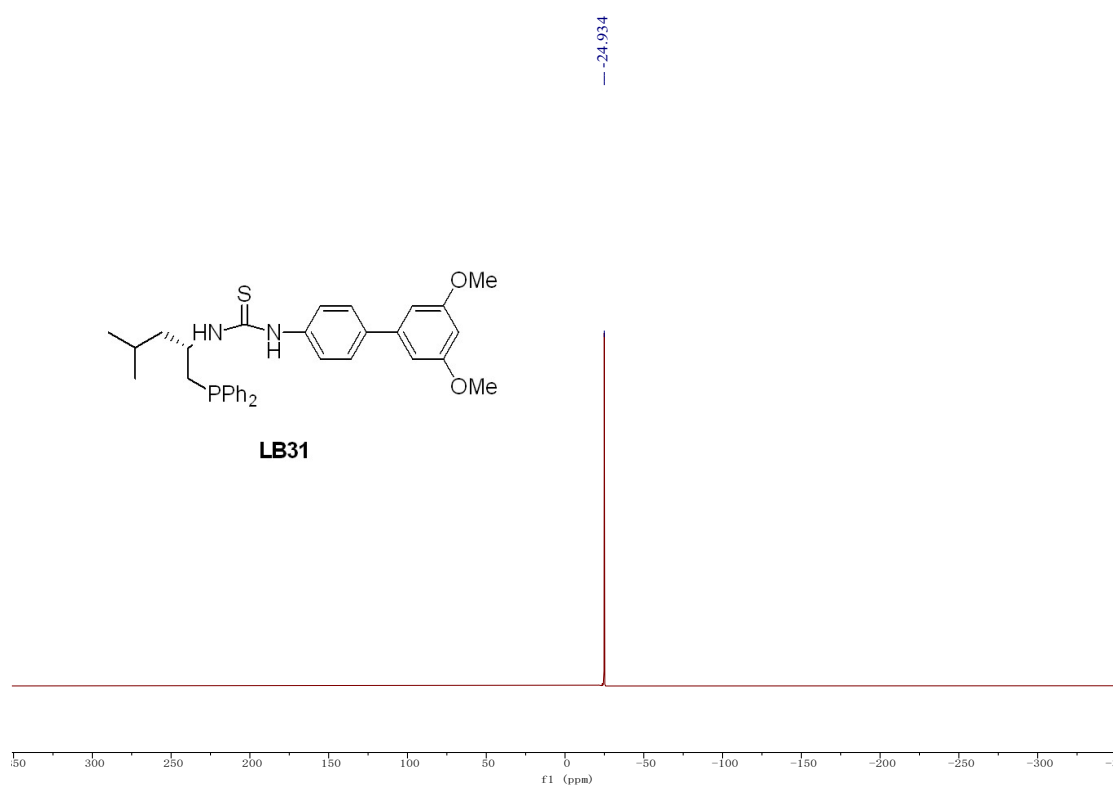

$^1\text{H}$ ,  $^{13}\text{C}$  and  $^{31}\text{P}$  NMR spectra of compound **LB31** (400 MHz,  $\text{CDCl}_3$ )

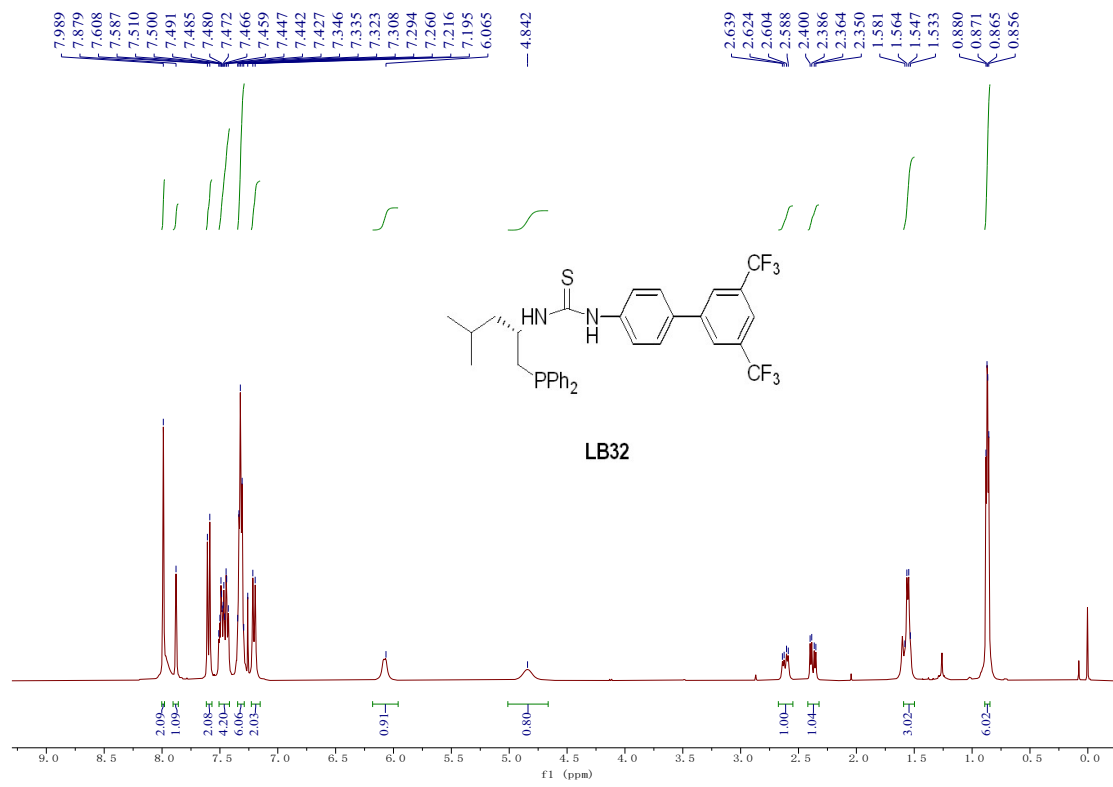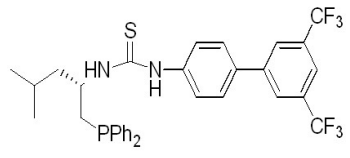

LB32

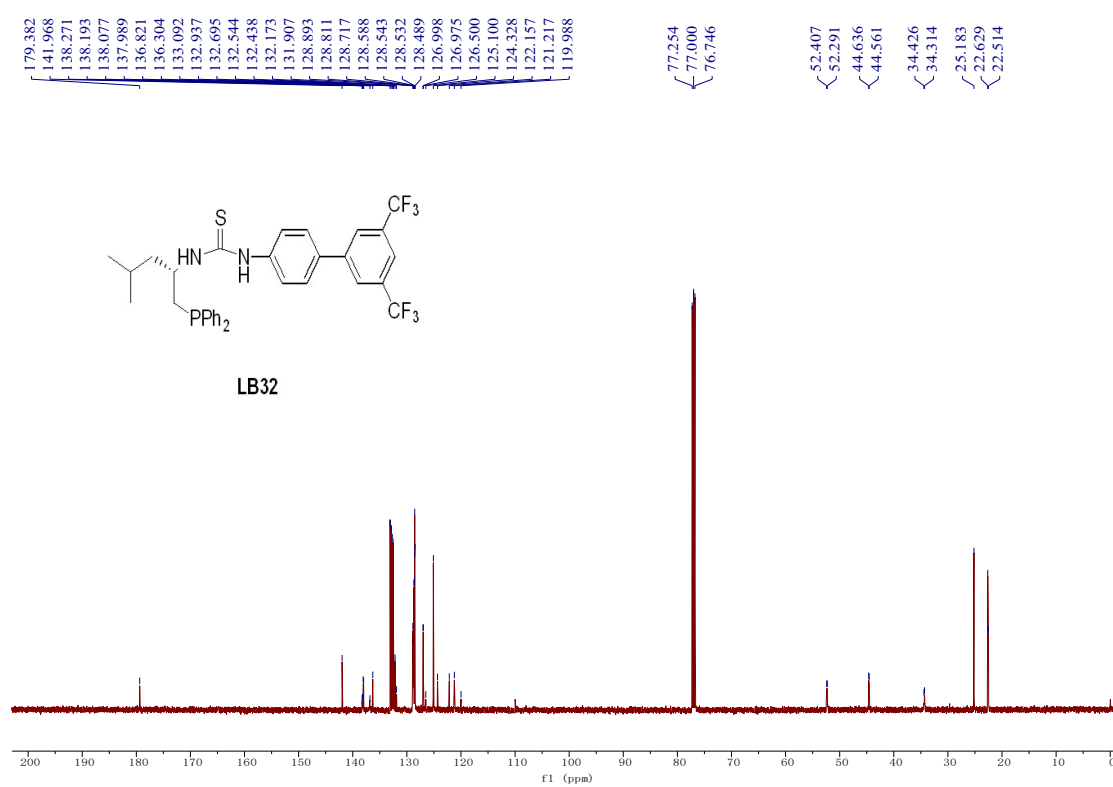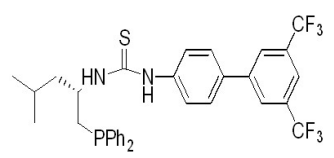

LB32



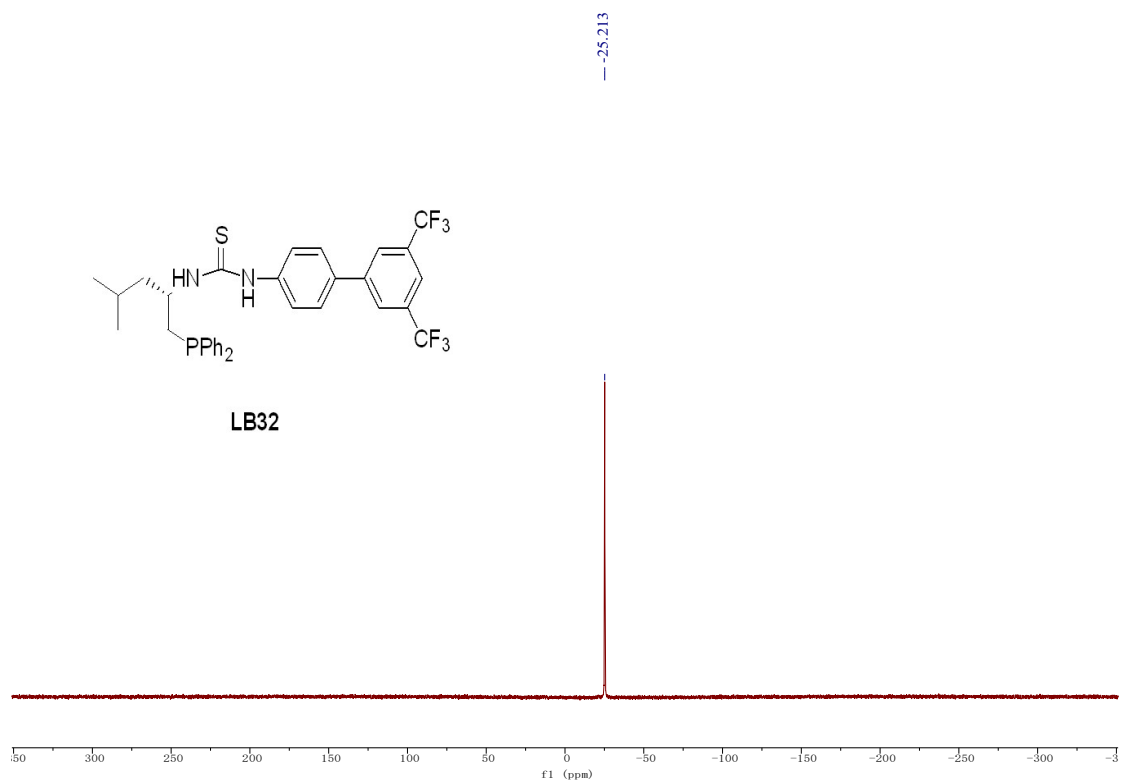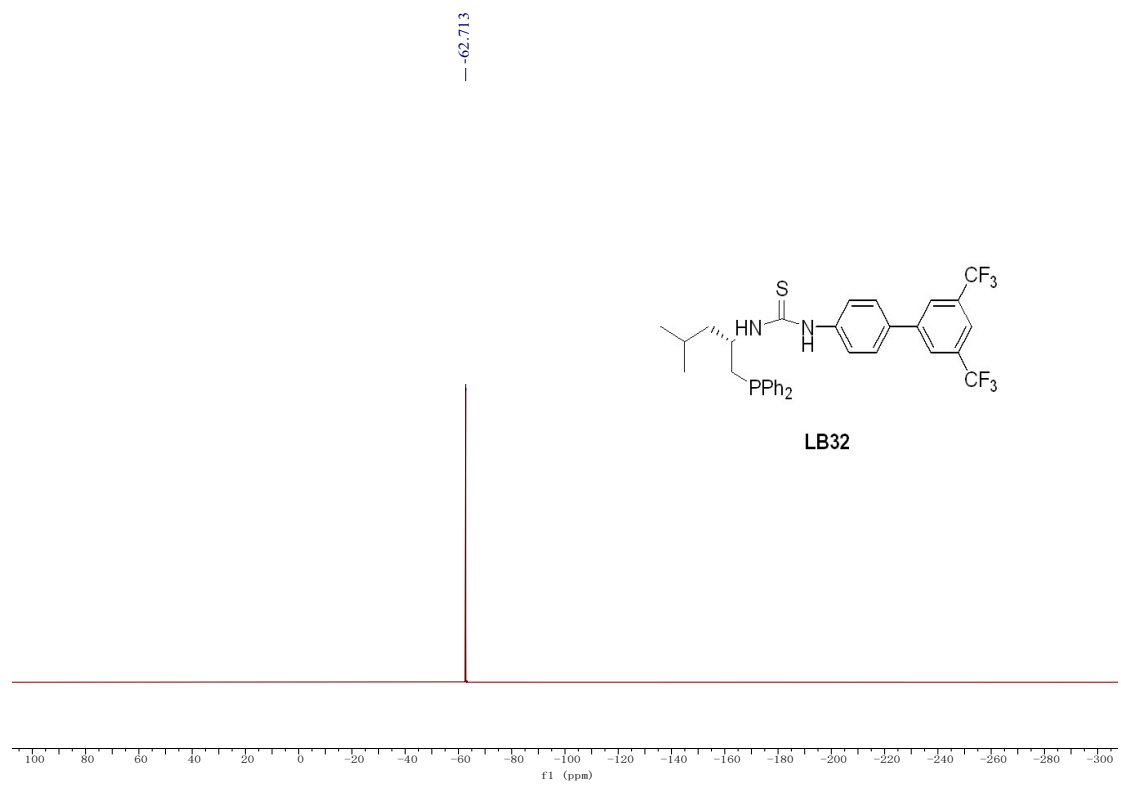

$^1\text{H}$ ,  $^{13}\text{C}$ ,  $^{31}\text{P}$  and  $^{19}\text{F}$  NMR spectra of compound **LB32** (400 MHz,  $\text{CDCl}_3$ )

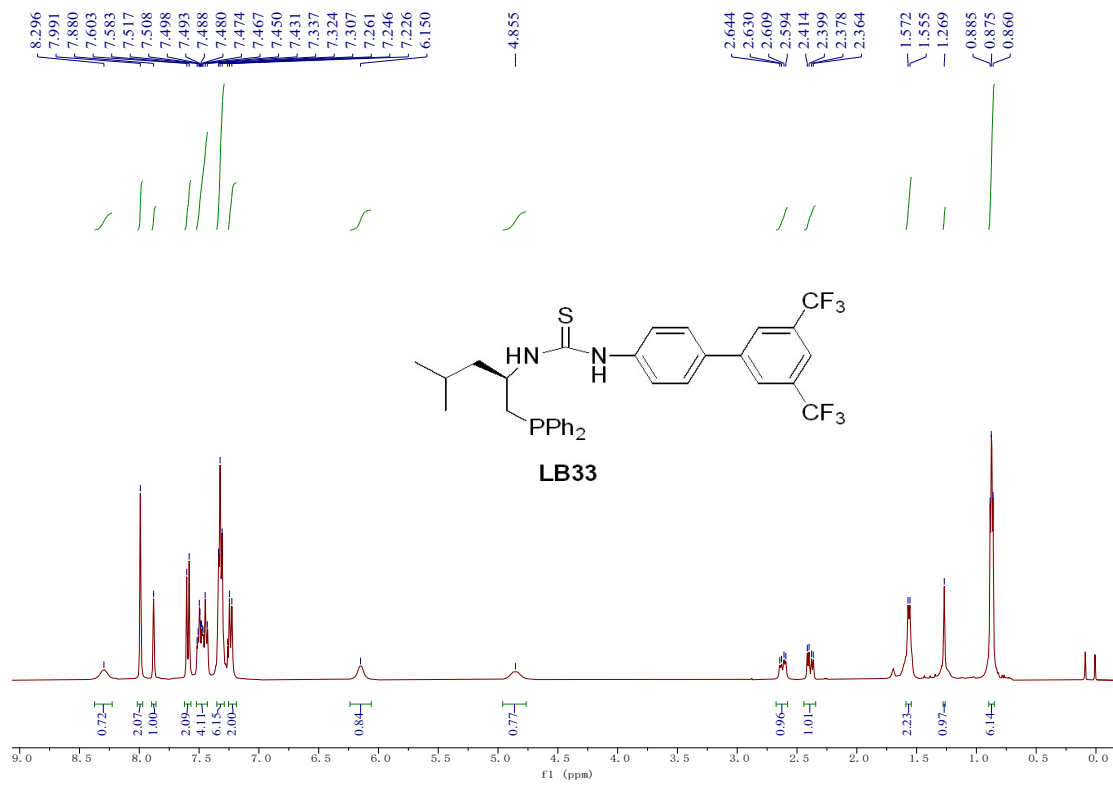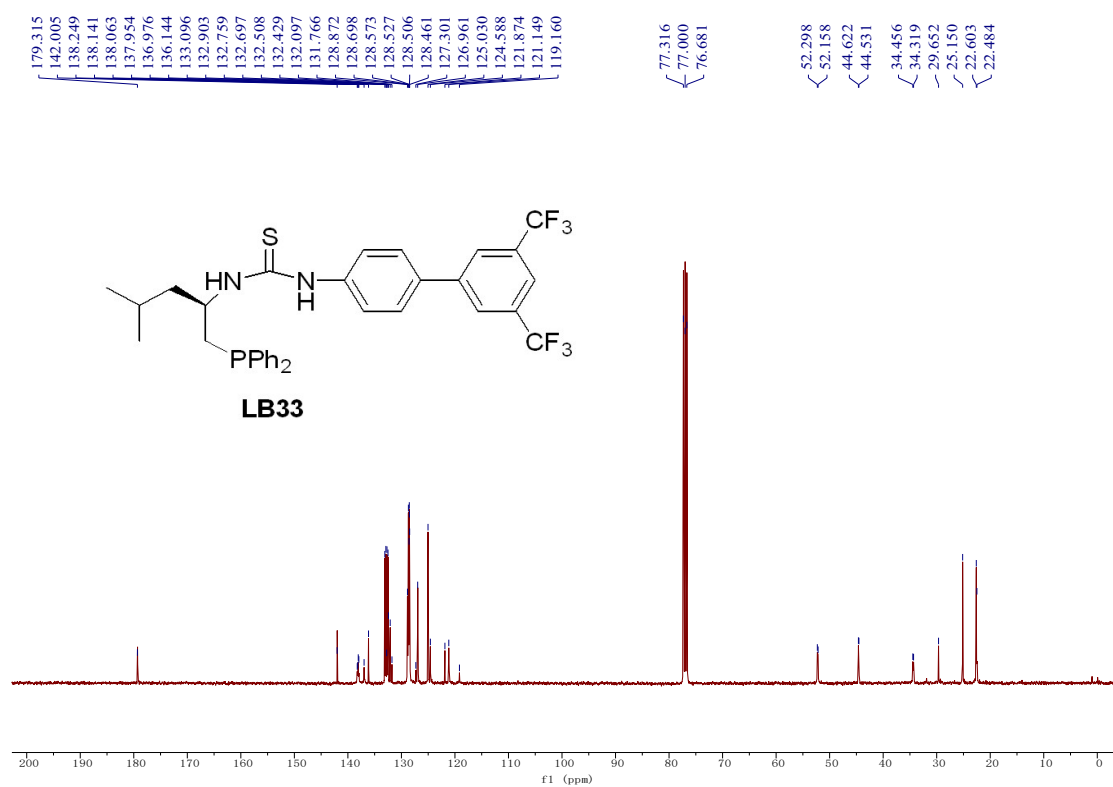

-25.217

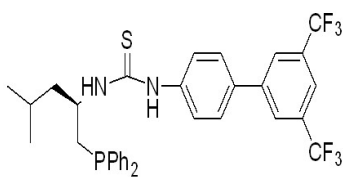

**LB33**

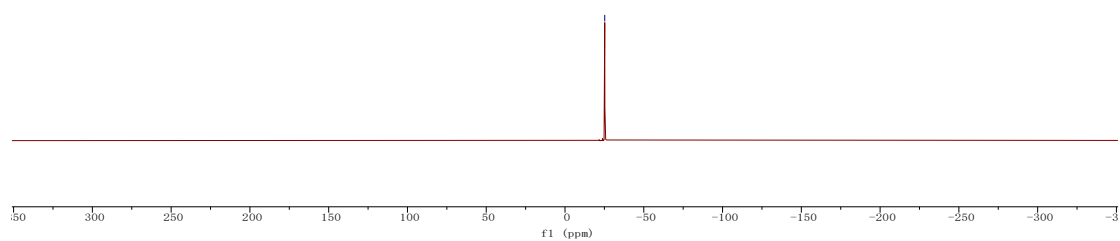

-62.688

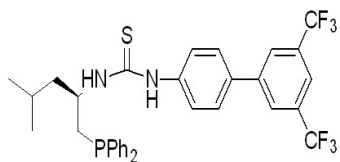

**LB33**

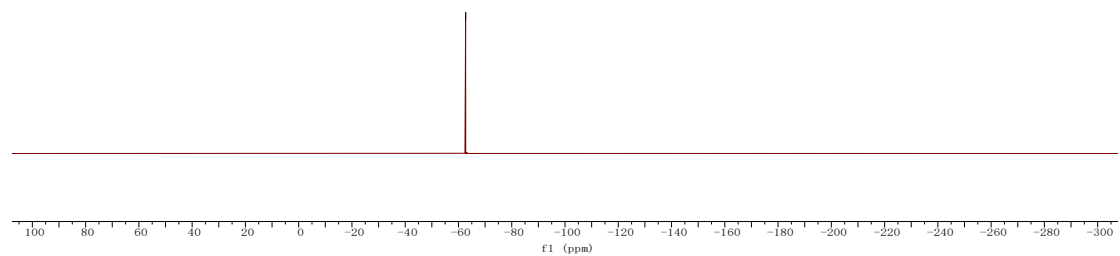

$^1\text{H}$ ,  $^{13}\text{C}$ ,  $^{31}\text{P}$  and  $^{19}\text{F}$  NMR spectra of compound **LB33** (400 MHz,  $\text{CDCl}_3$ )

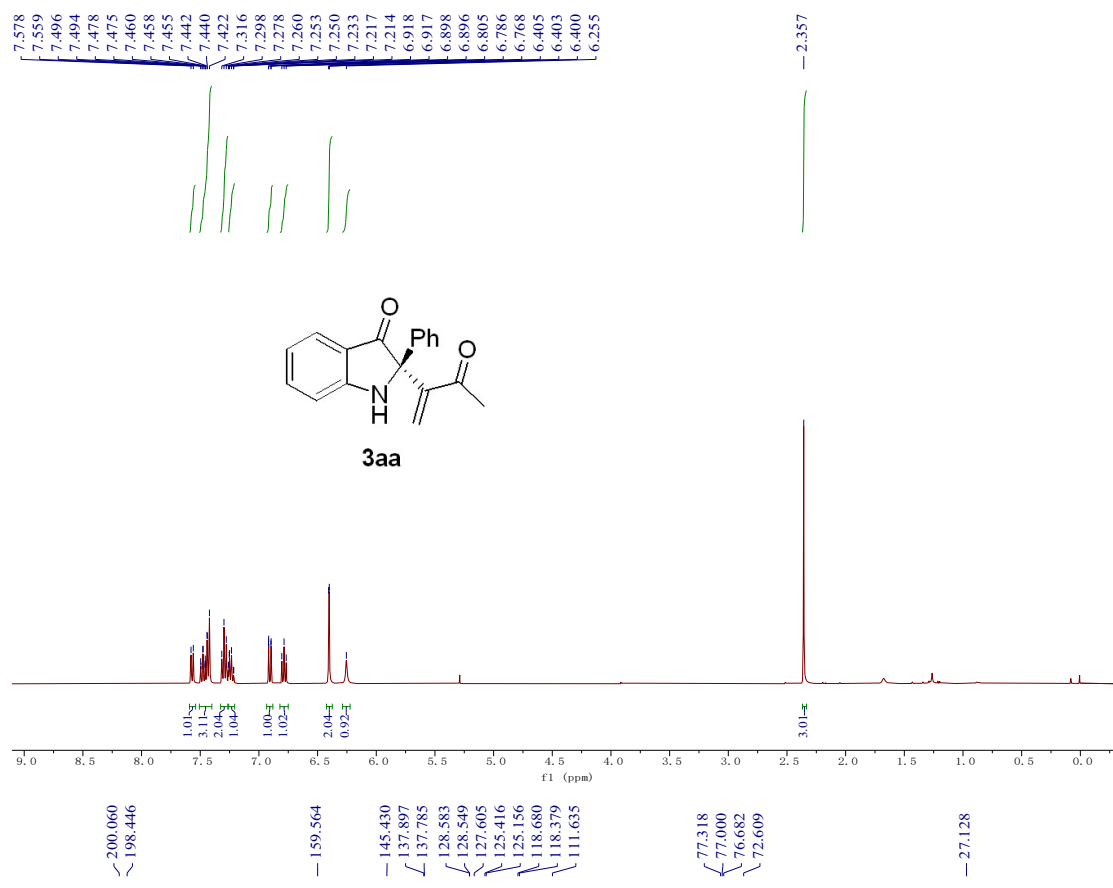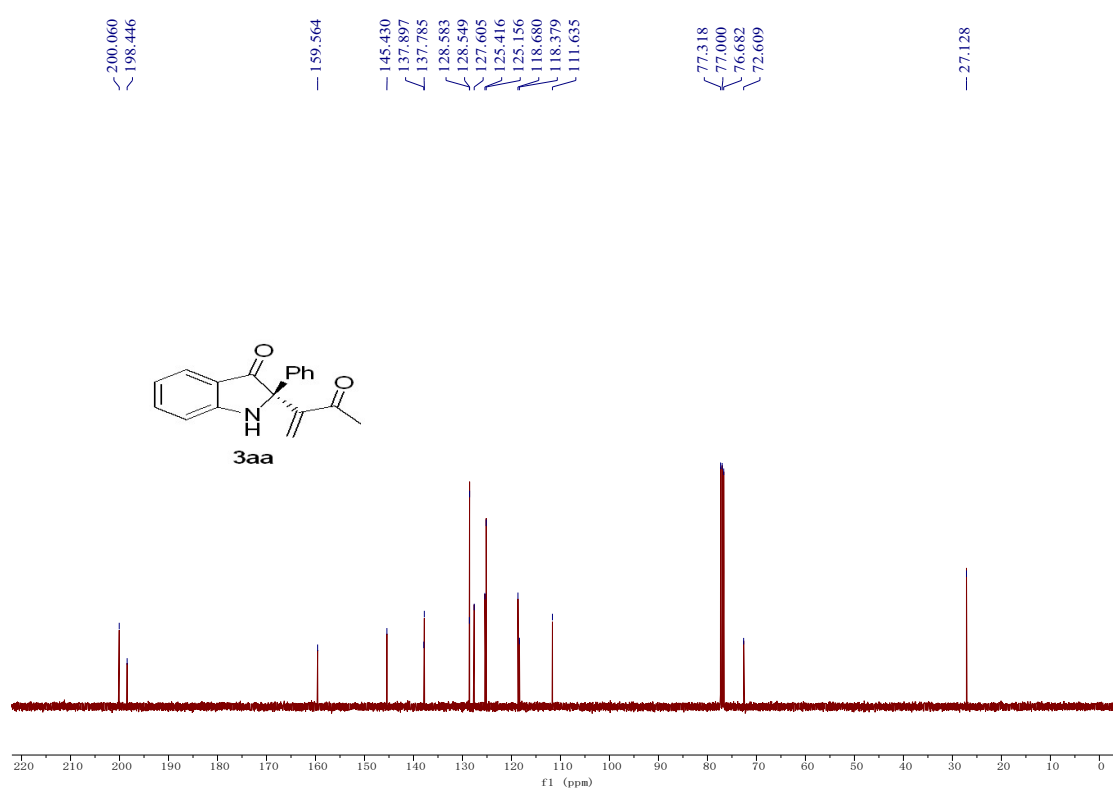

<sup>1</sup>H and <sup>13</sup>C NMR spectra of compound **3aa** (400 MHz, CDCl<sub>3</sub>)

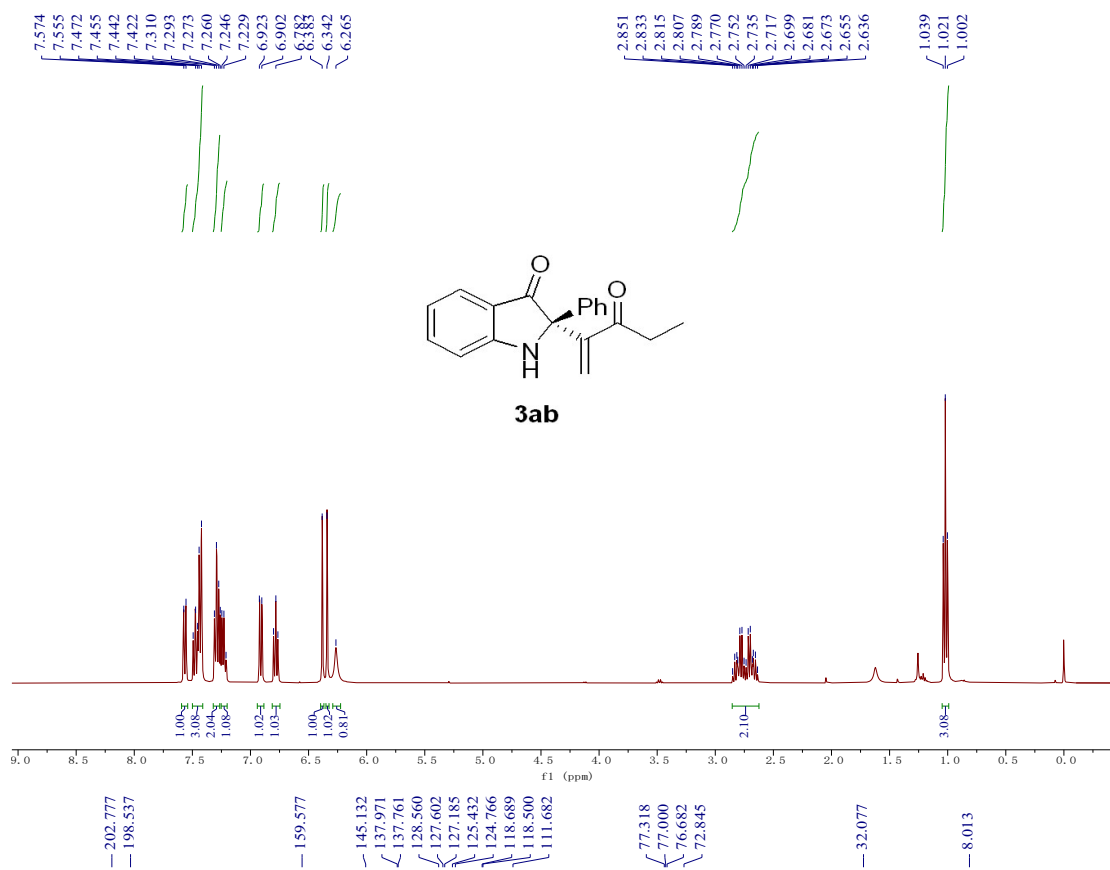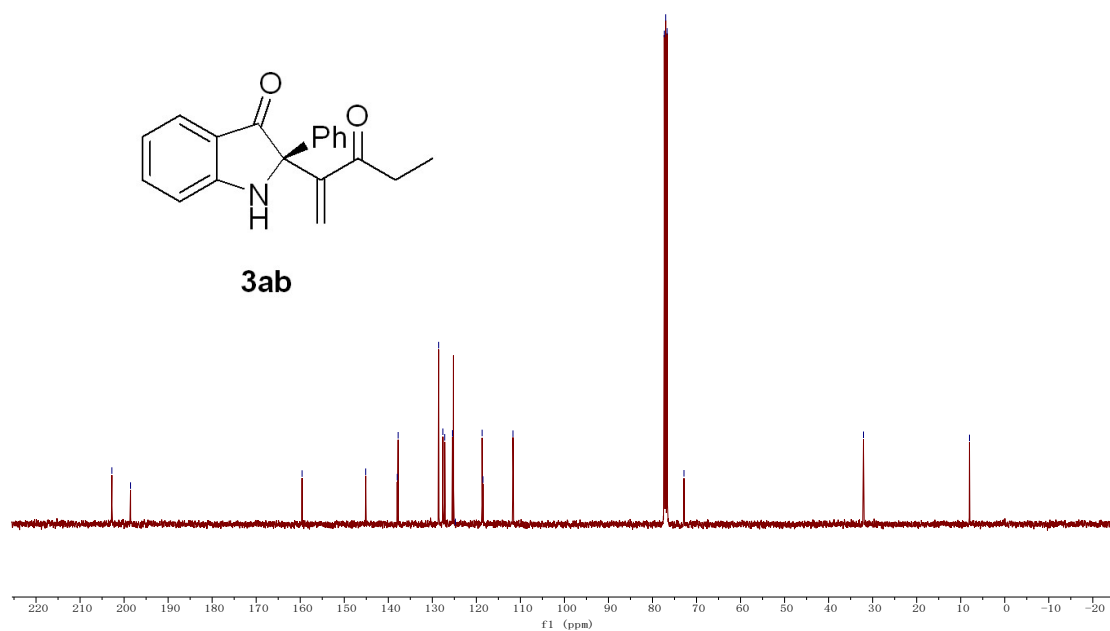

<sup>1</sup>H and <sup>13</sup>C NMR spectra of compound **3ab** (400 MHz, CDCl<sub>3</sub>)

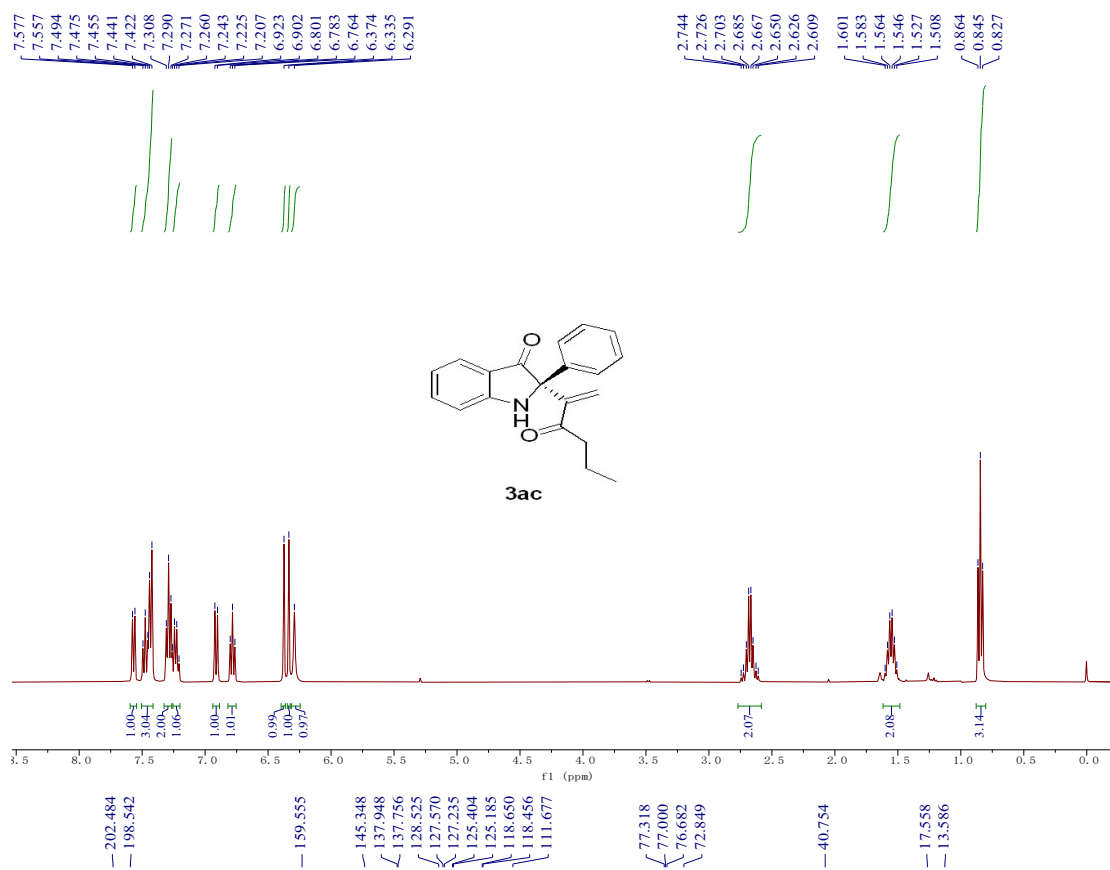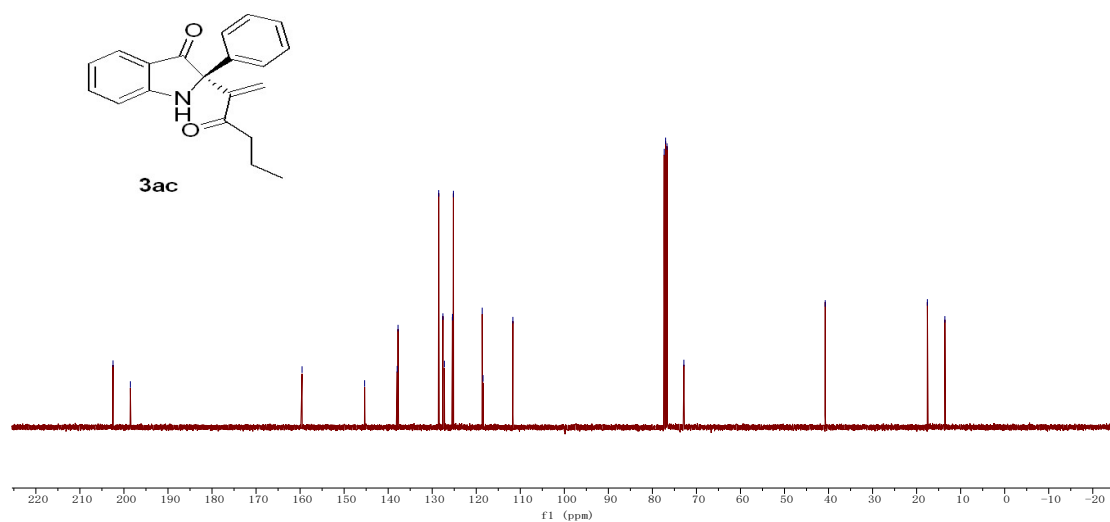

<sup>1</sup>H and <sup>13</sup>C NMR spectra of compound **3ac** (400 MHz, CDCl<sub>3</sub>)

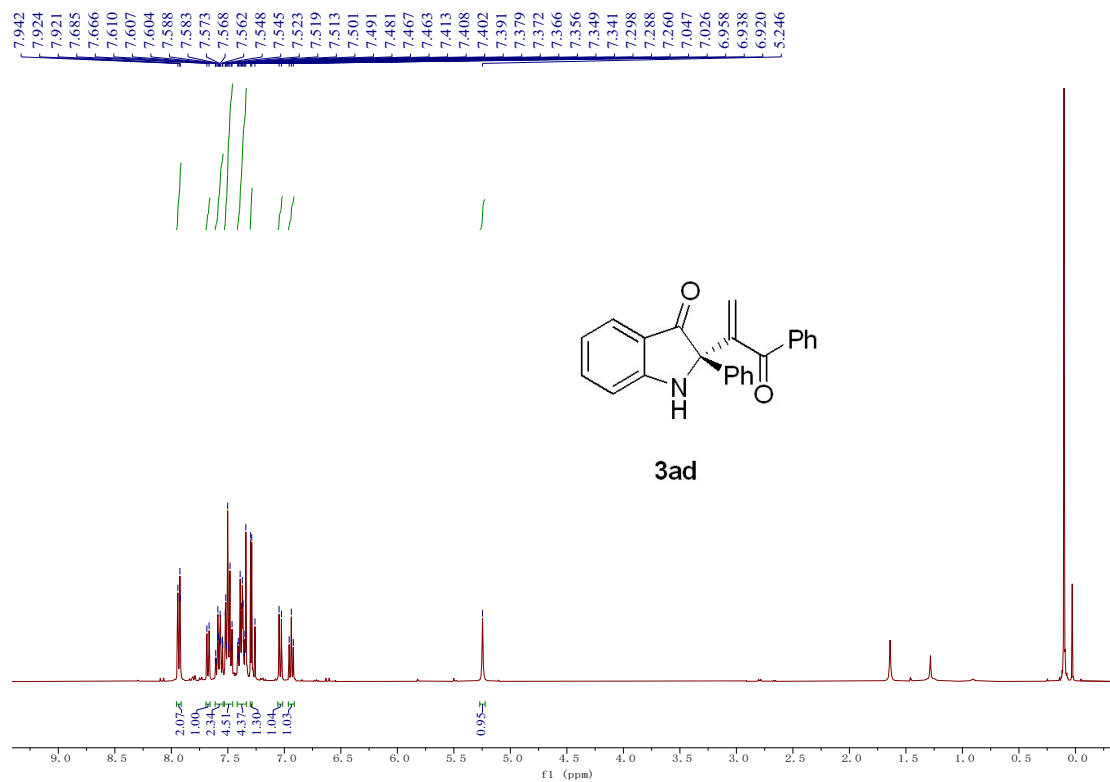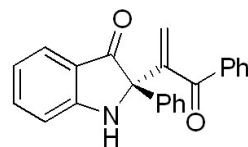

**3ad**

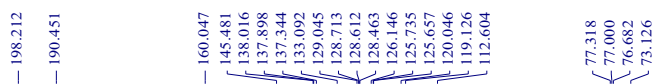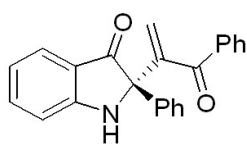

**3ad**

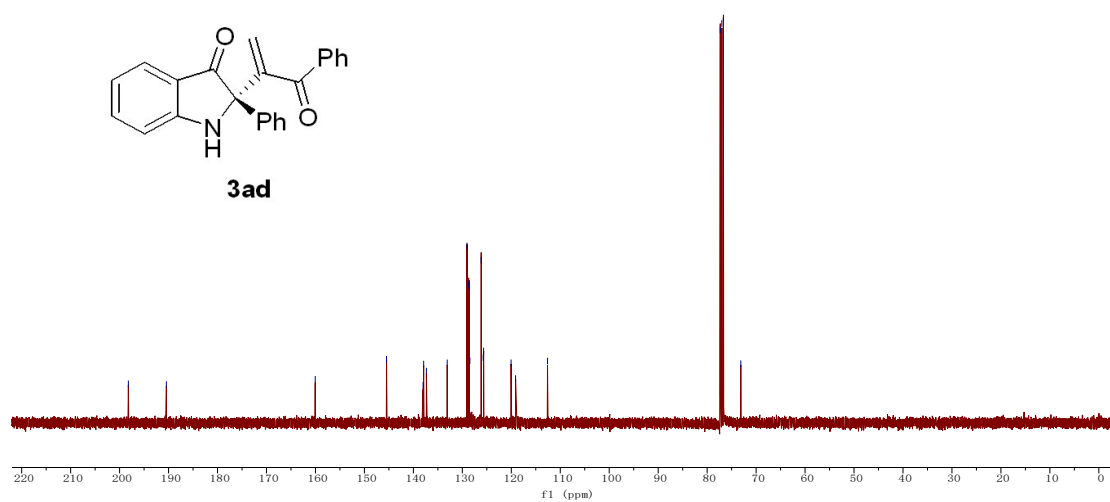

$^1\text{H}$  and  $^{13}\text{C}$  NMR spectra of compound **3ad** (400 MHz,  $\text{CDCl}_3$ )

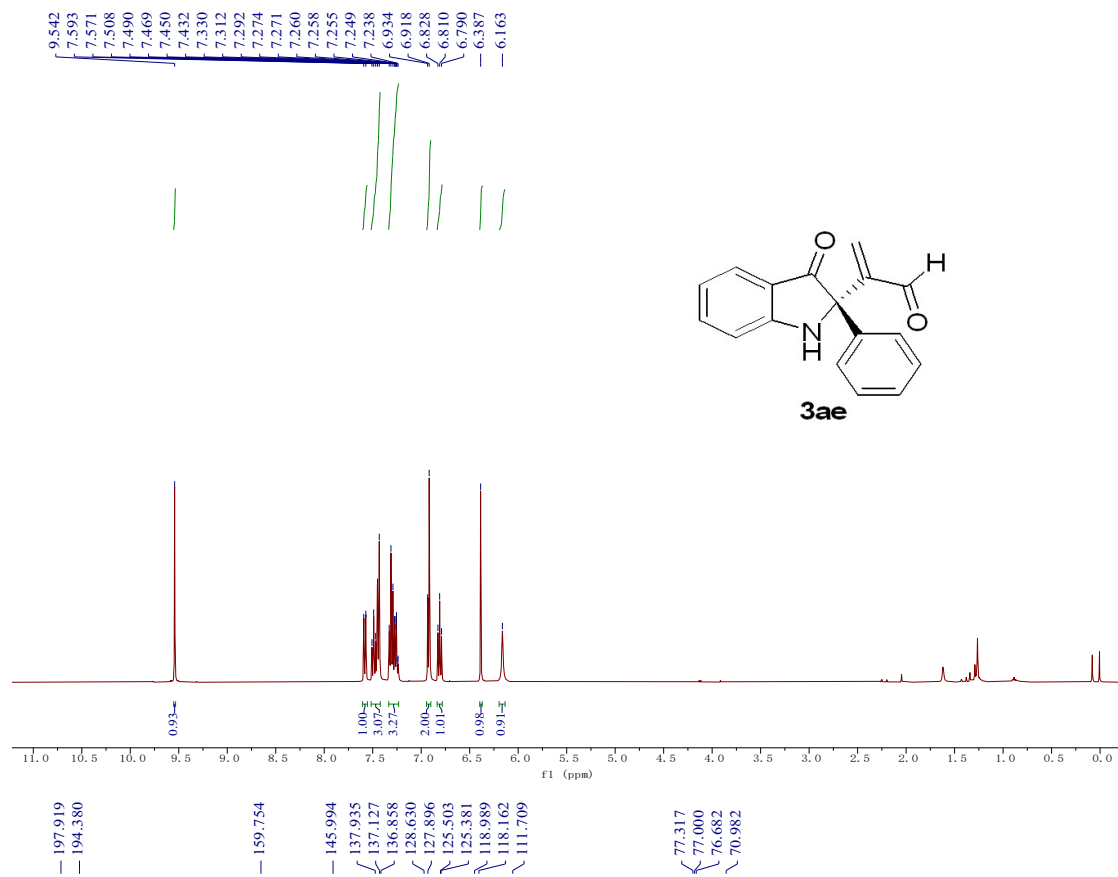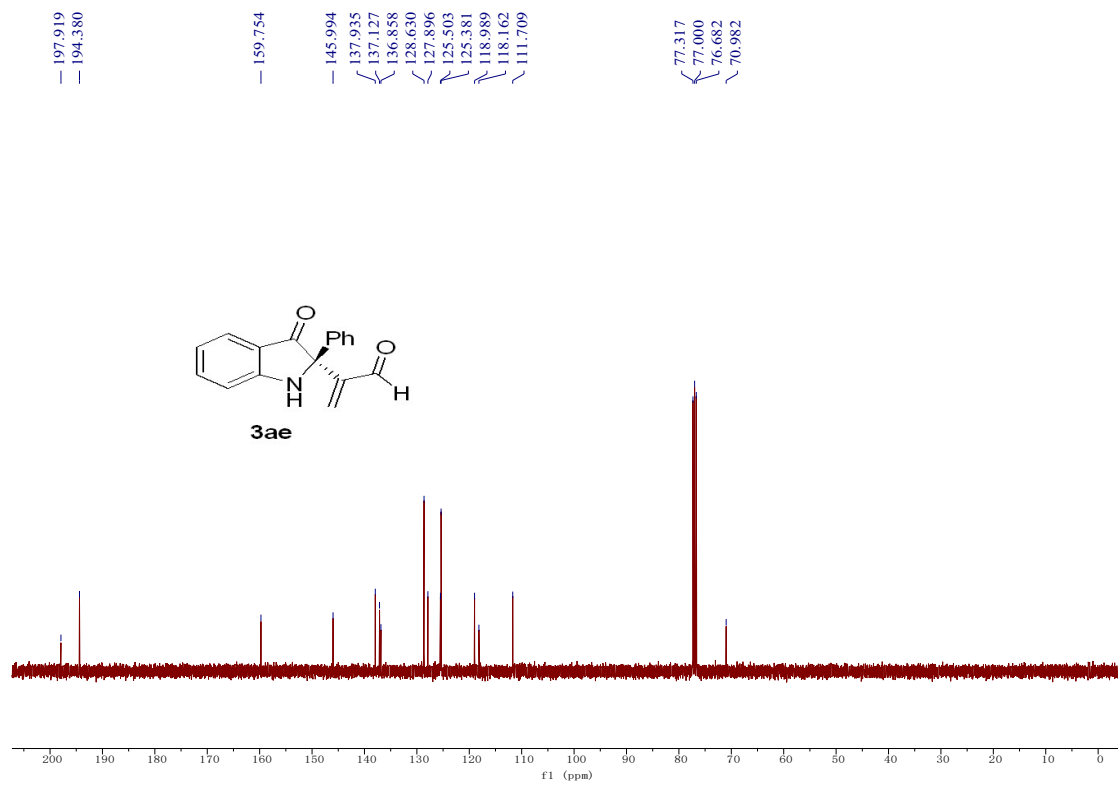

<sup>1</sup>H and <sup>13</sup>C NMR spectra of compound **3ae** (400 MHz, CDCl<sub>3</sub>)



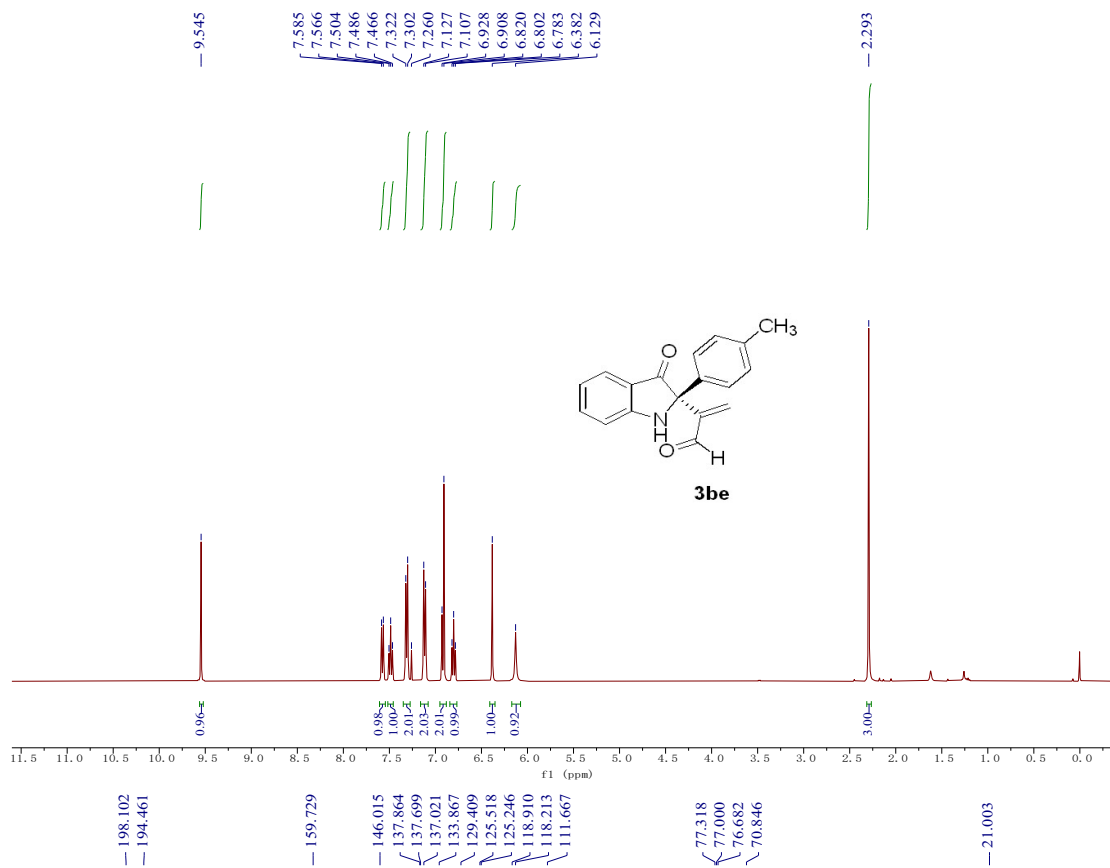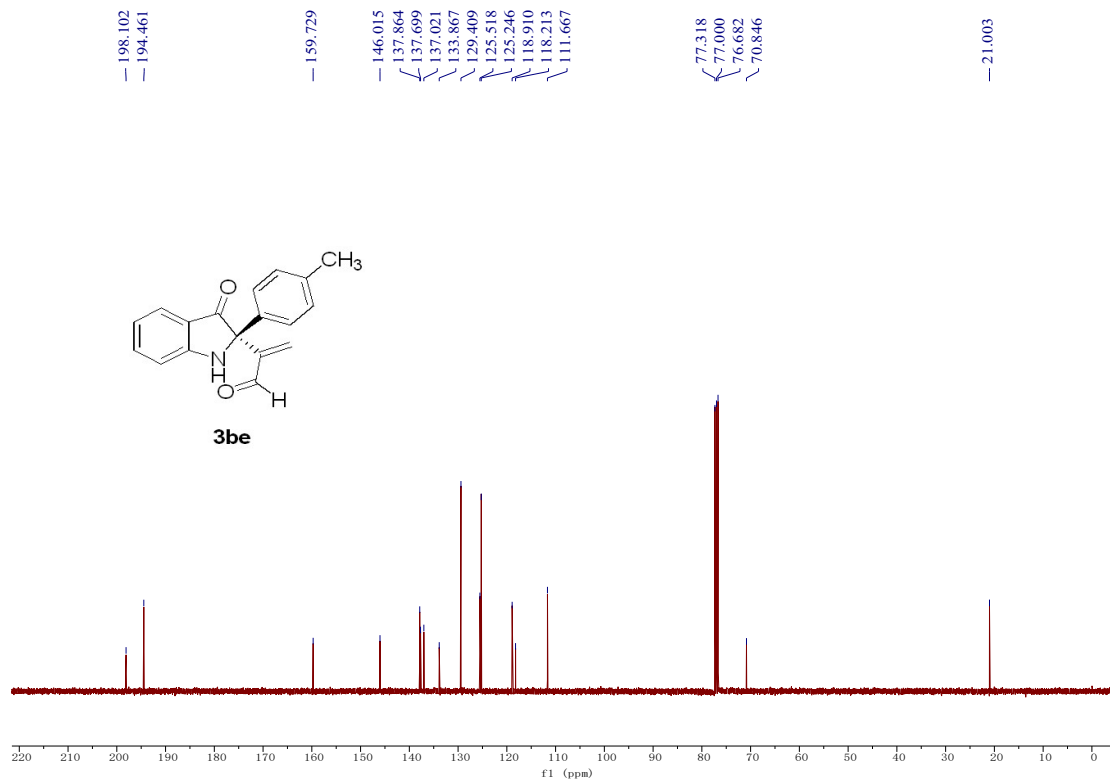

**<sup>1</sup>H and <sup>13</sup>C NMR spectra of compound 3be (400 MHz, CDCl<sub>3</sub>)**

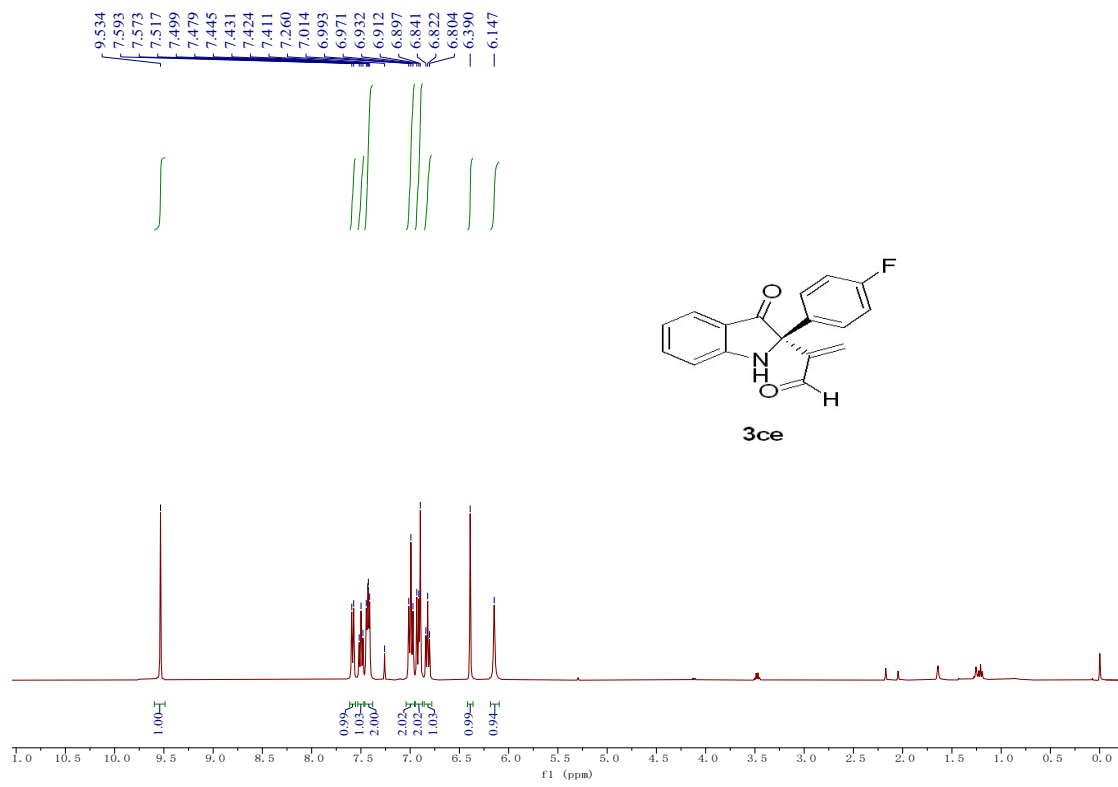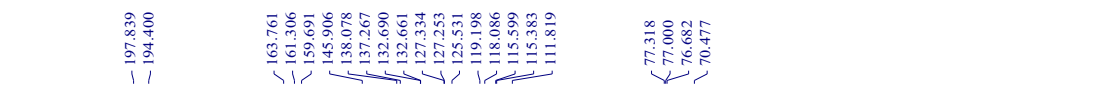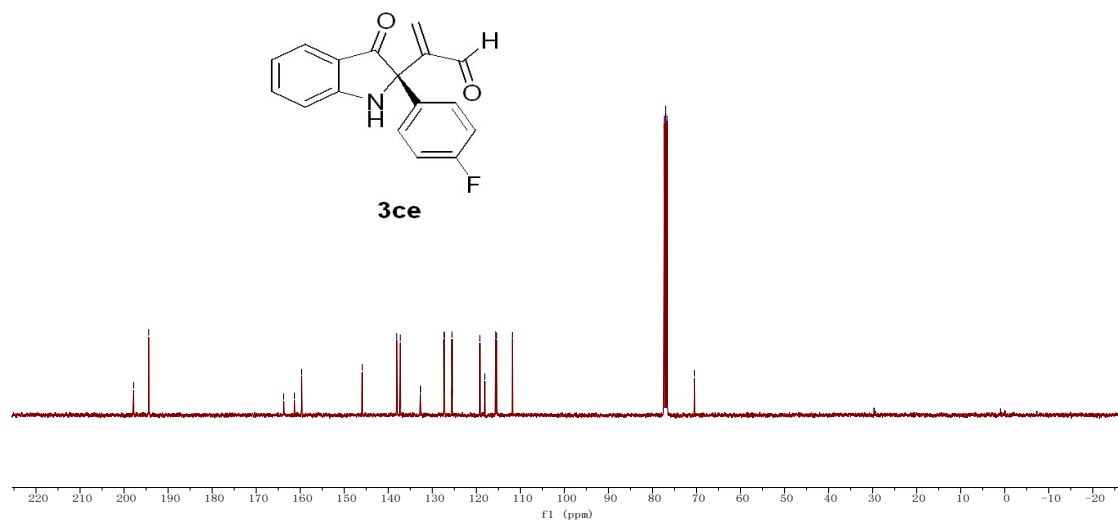

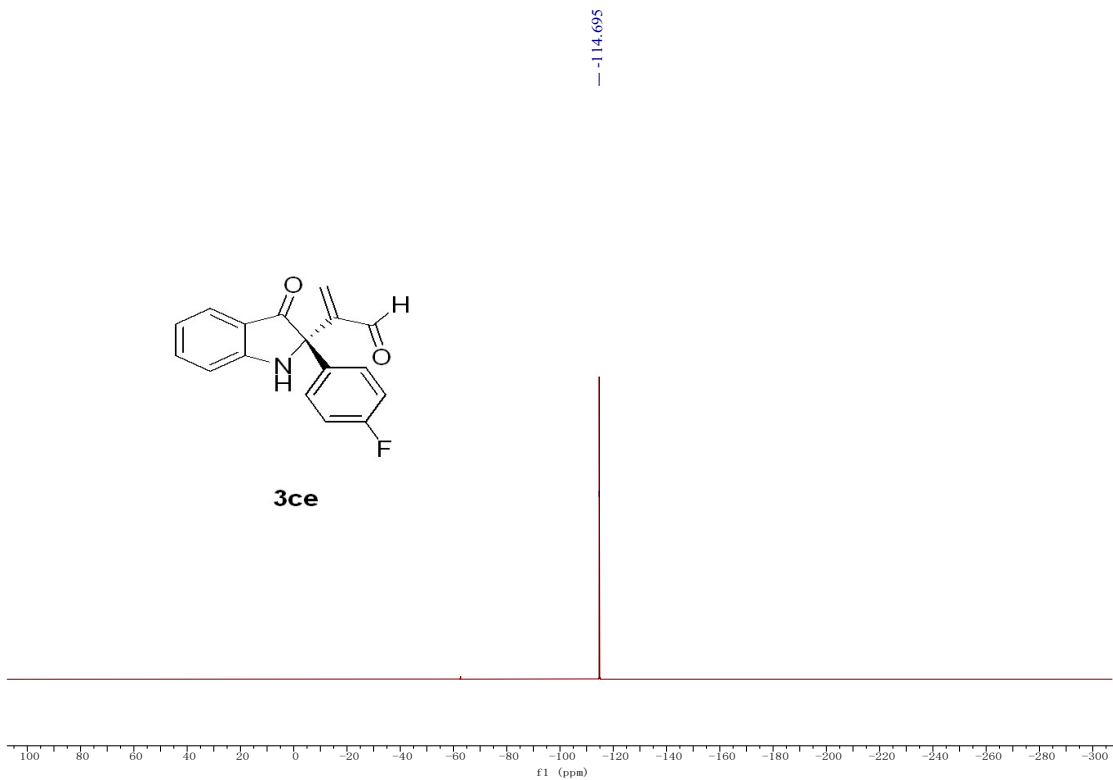

<sup>1</sup>H, <sup>13</sup>C and <sup>19</sup>F NMR spectra of compound **3ce** (400 MHz, CDCl<sub>3</sub>)

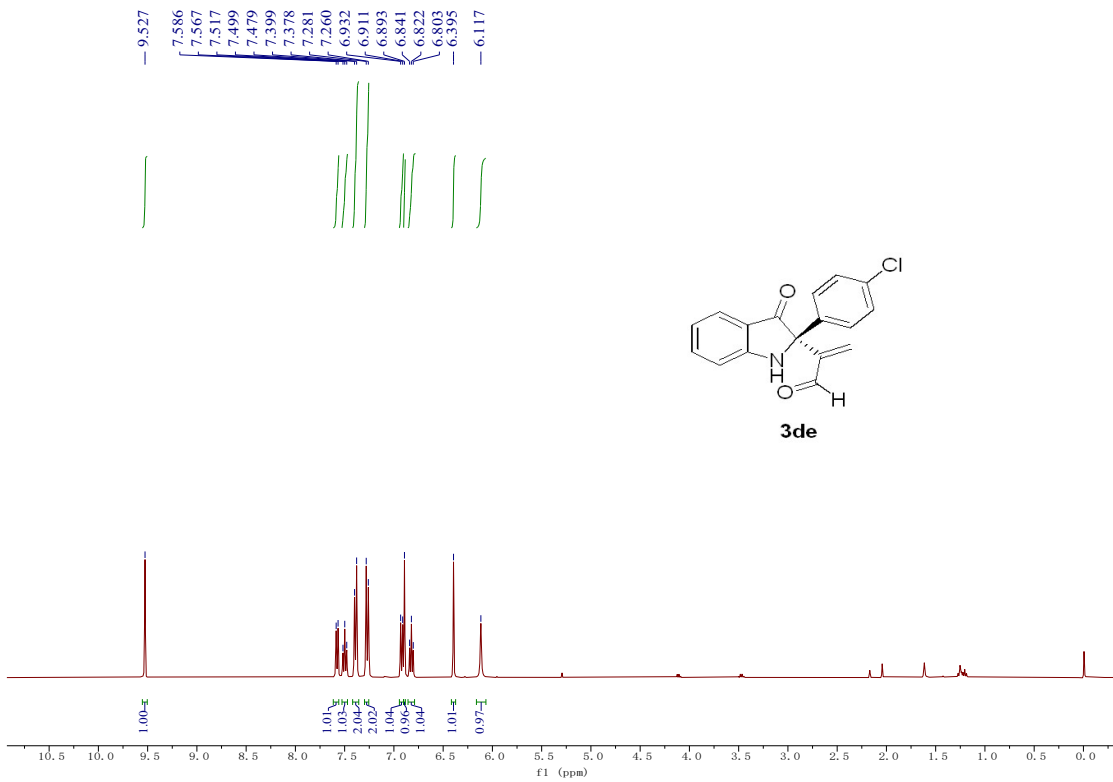

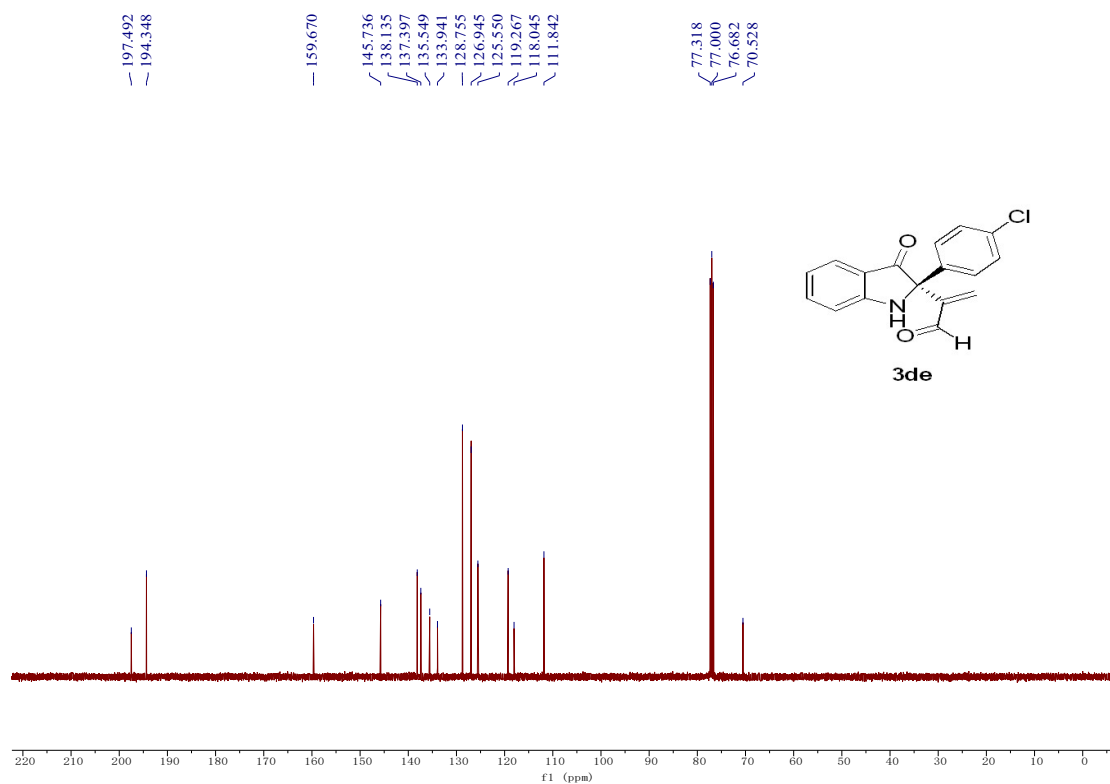

$^1\text{H}$  and  $^{13}\text{C}$  NMR spectra of compound **3de** (400 MHz,  $\text{CDCl}_3$ )

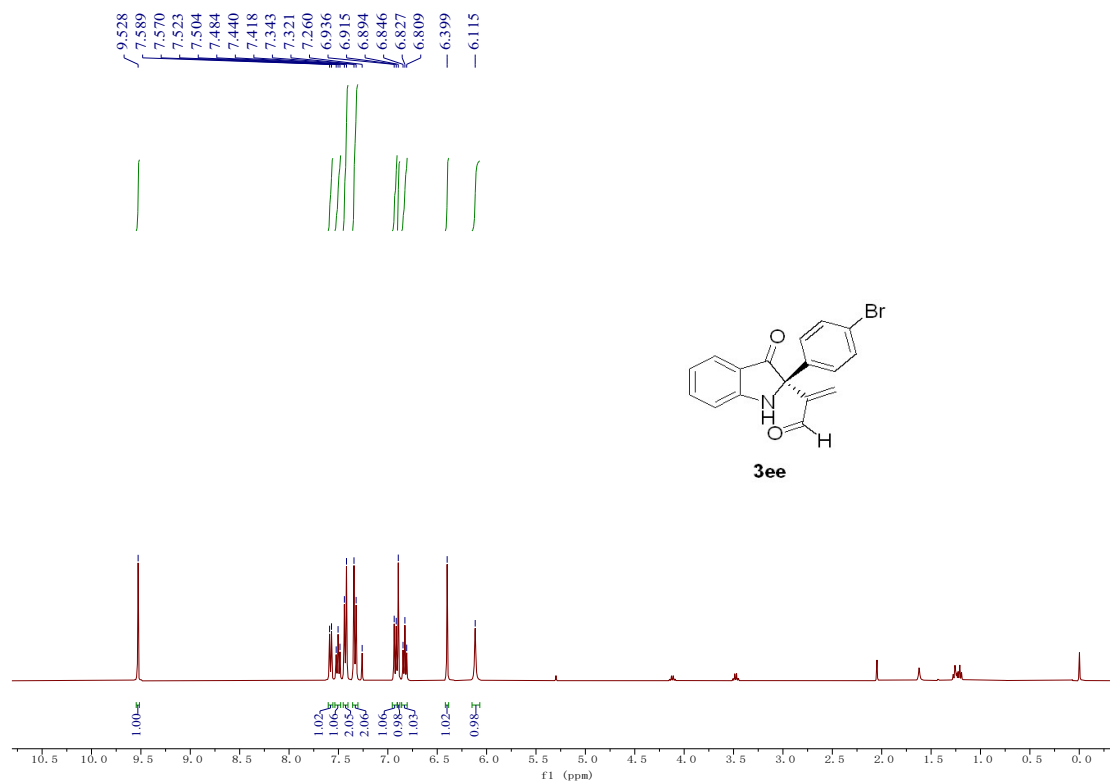

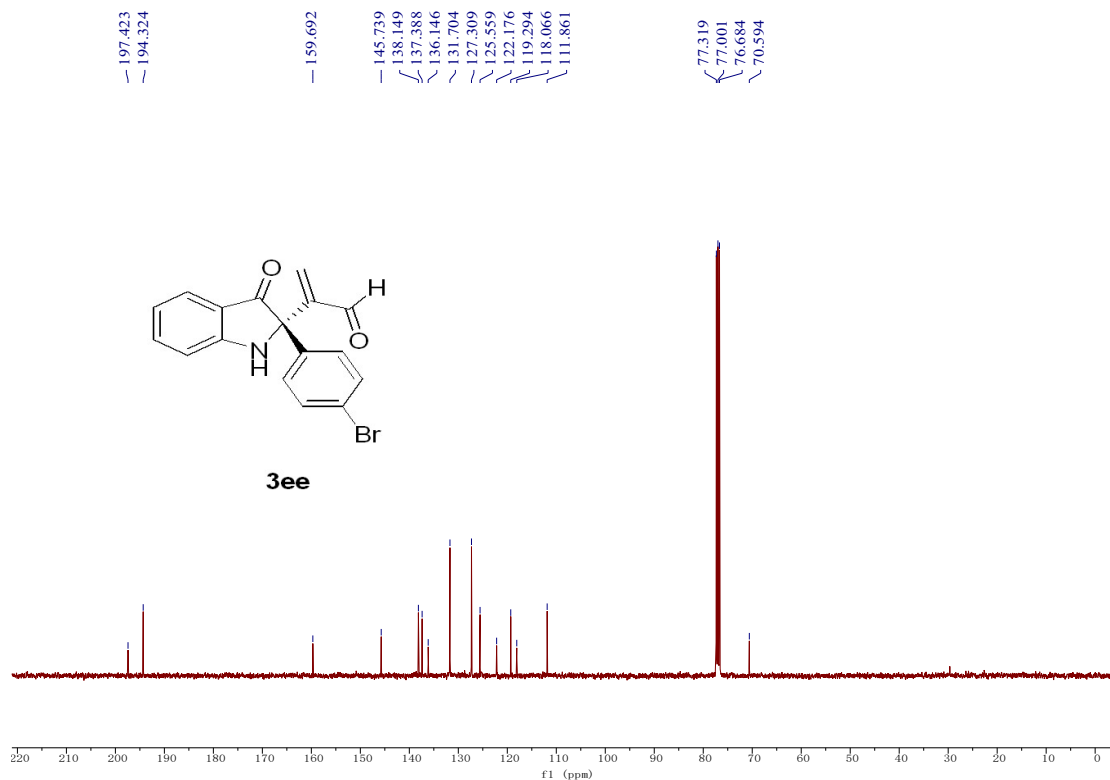

$^1\text{H}$  and  $^{13}\text{C}$  NMR spectra of compound **3ee** (400 MHz,  $\text{CDCl}_3$ )

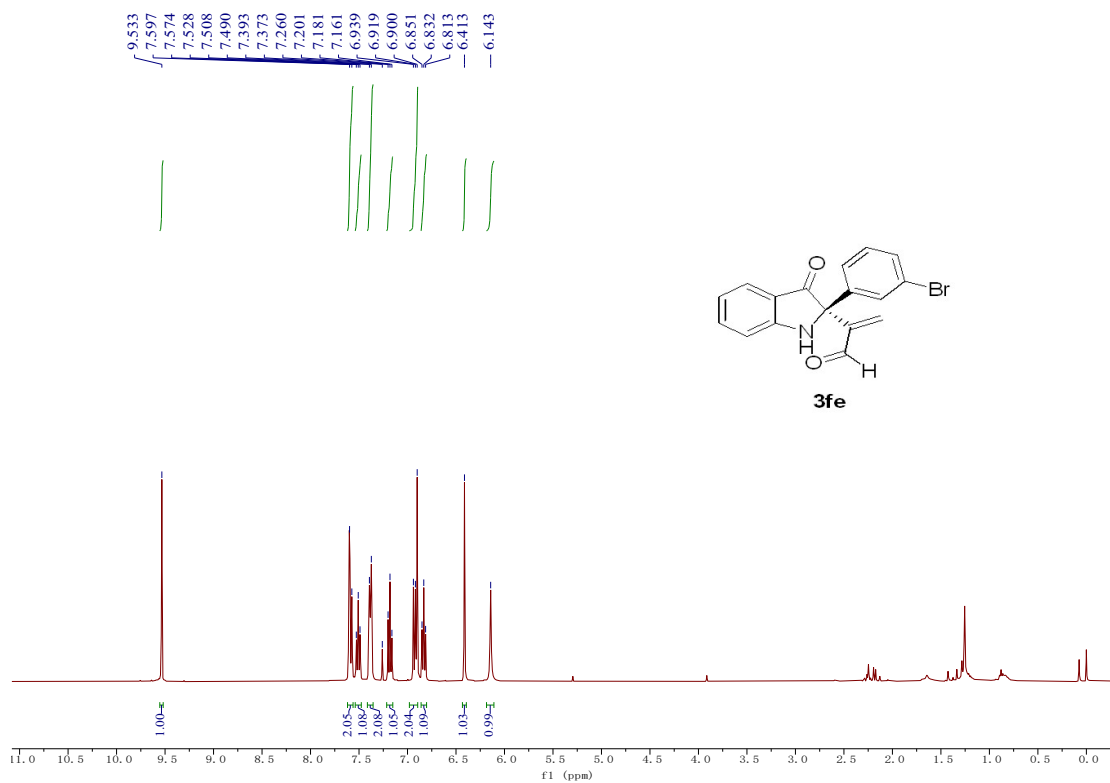

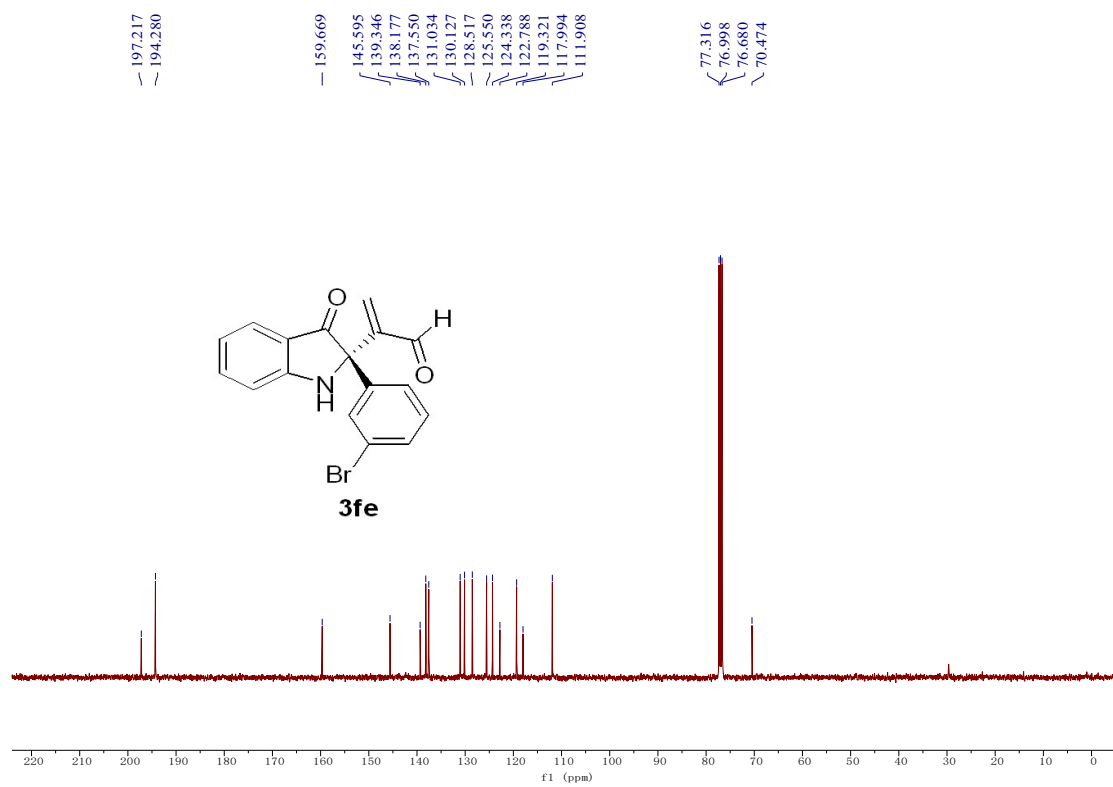

<sup>1</sup>H and <sup>13</sup>C NMR spectra of compound **3fe** (400 MHz, CDCl<sub>3</sub>)

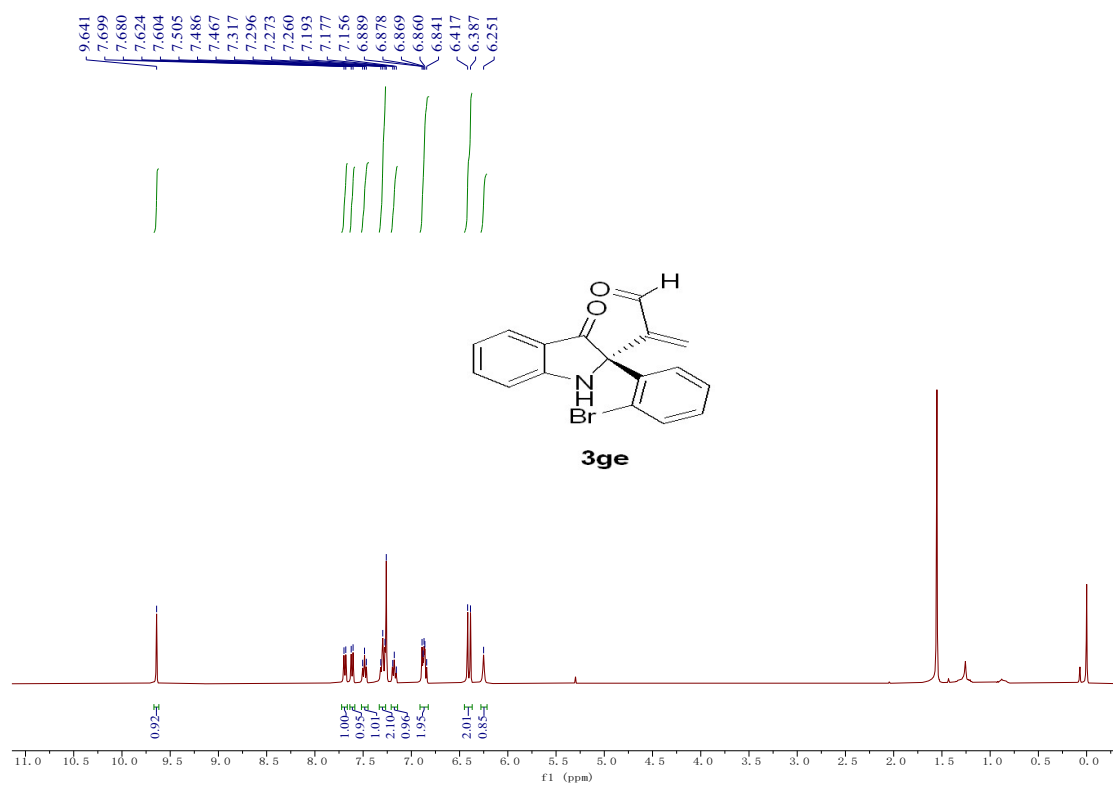

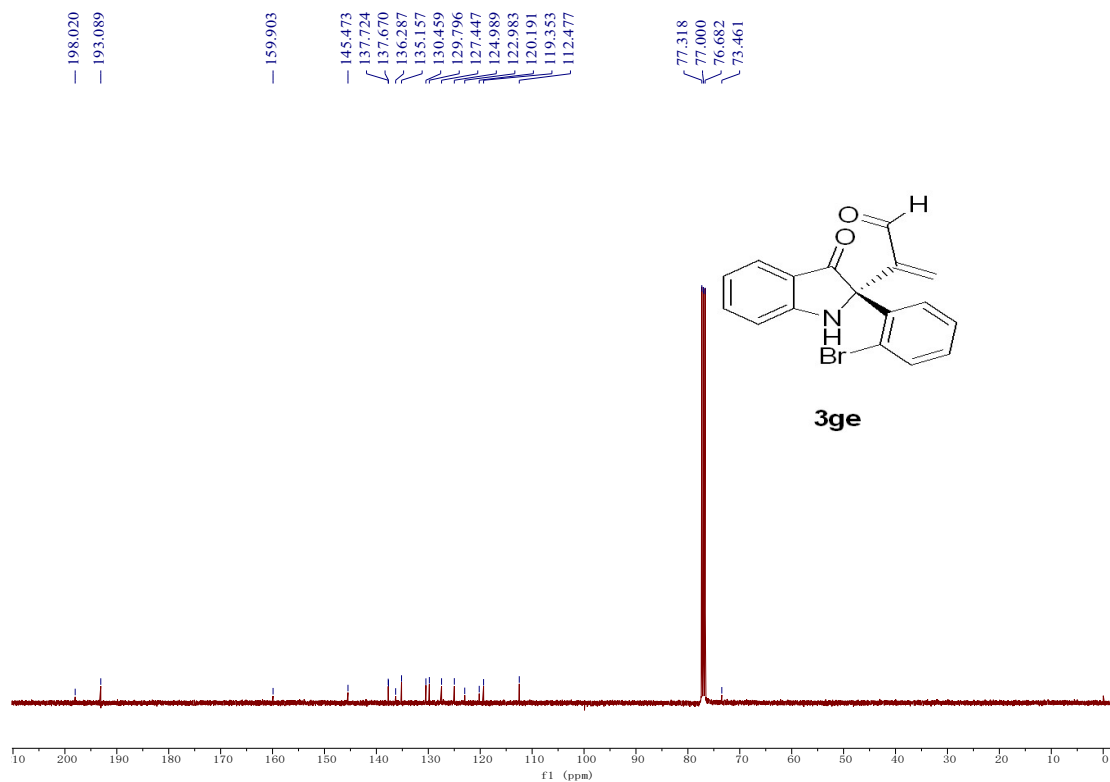

<sup>1</sup>H and <sup>13</sup>C NMR spectra of compound **3ge** (400 MHz, CDCl<sub>3</sub>)

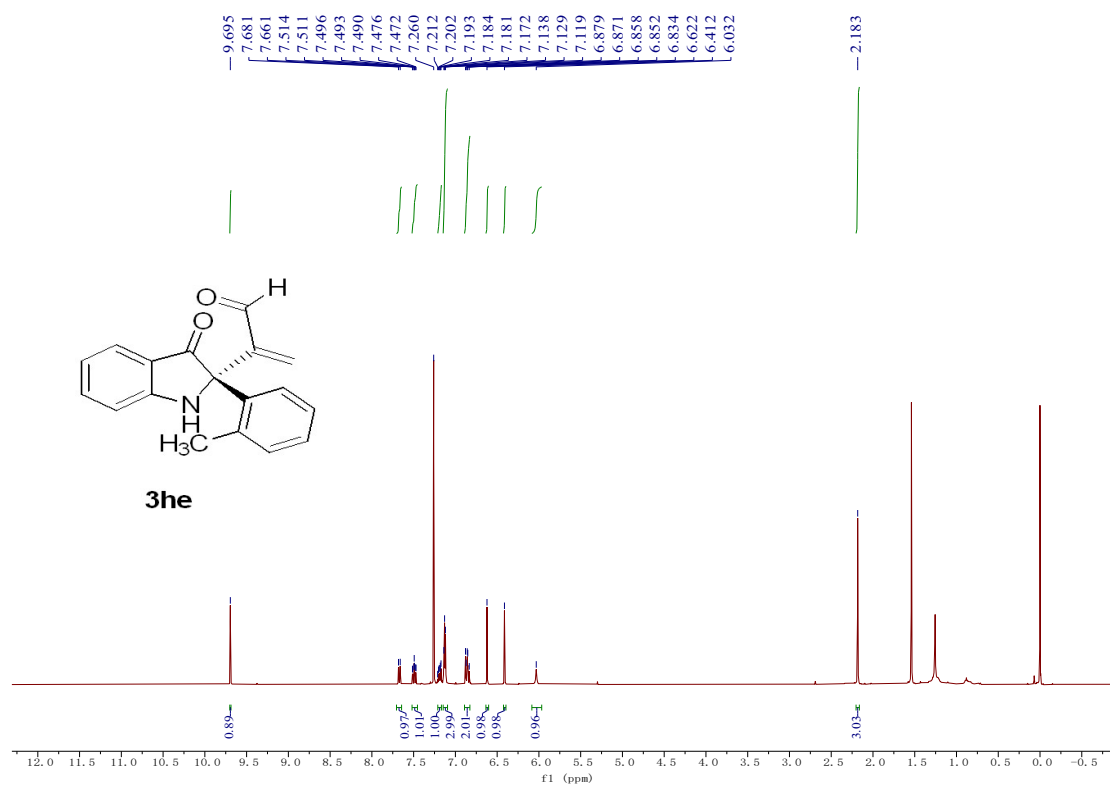

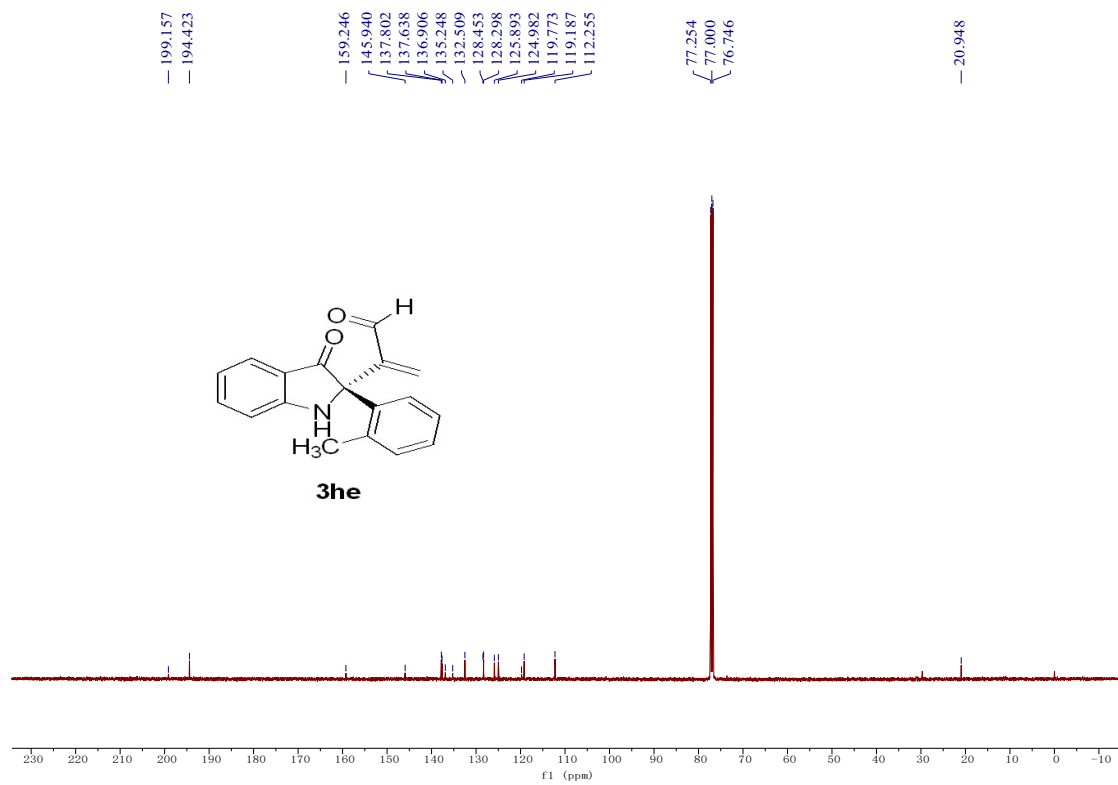

<sup>1</sup>H and <sup>13</sup>C NMR spectra of compound **3he** (400 MHz, CDCl<sub>3</sub>)

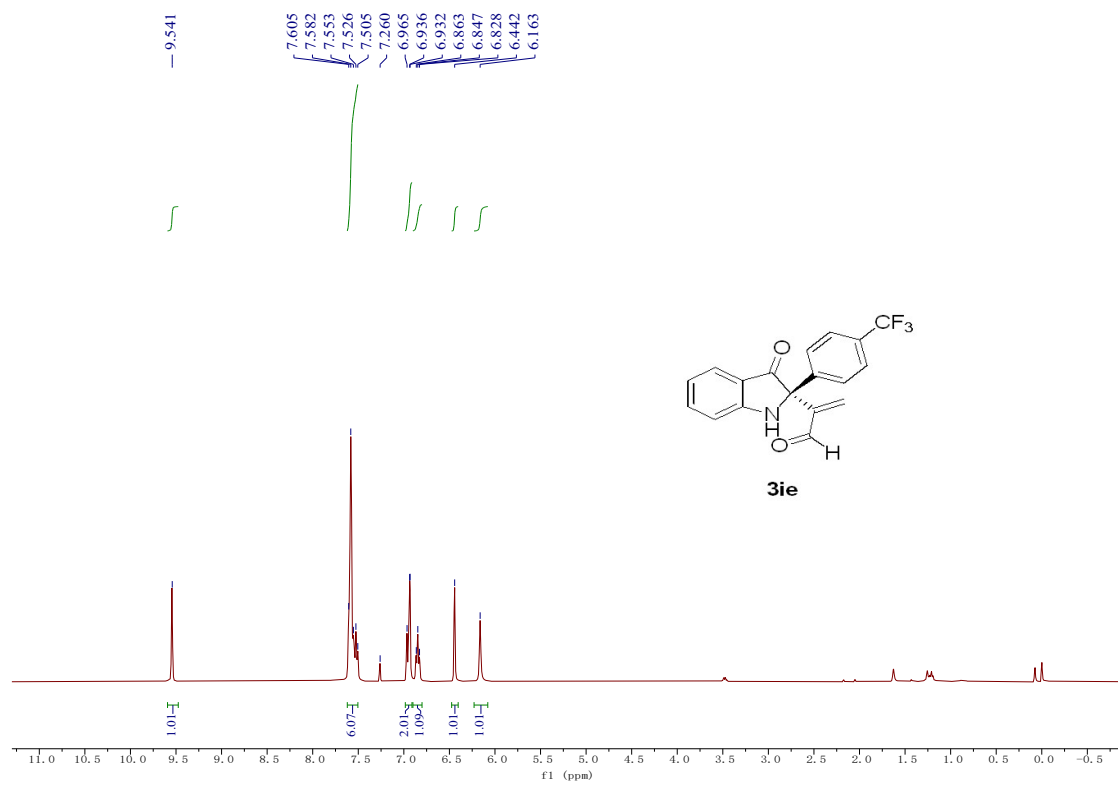



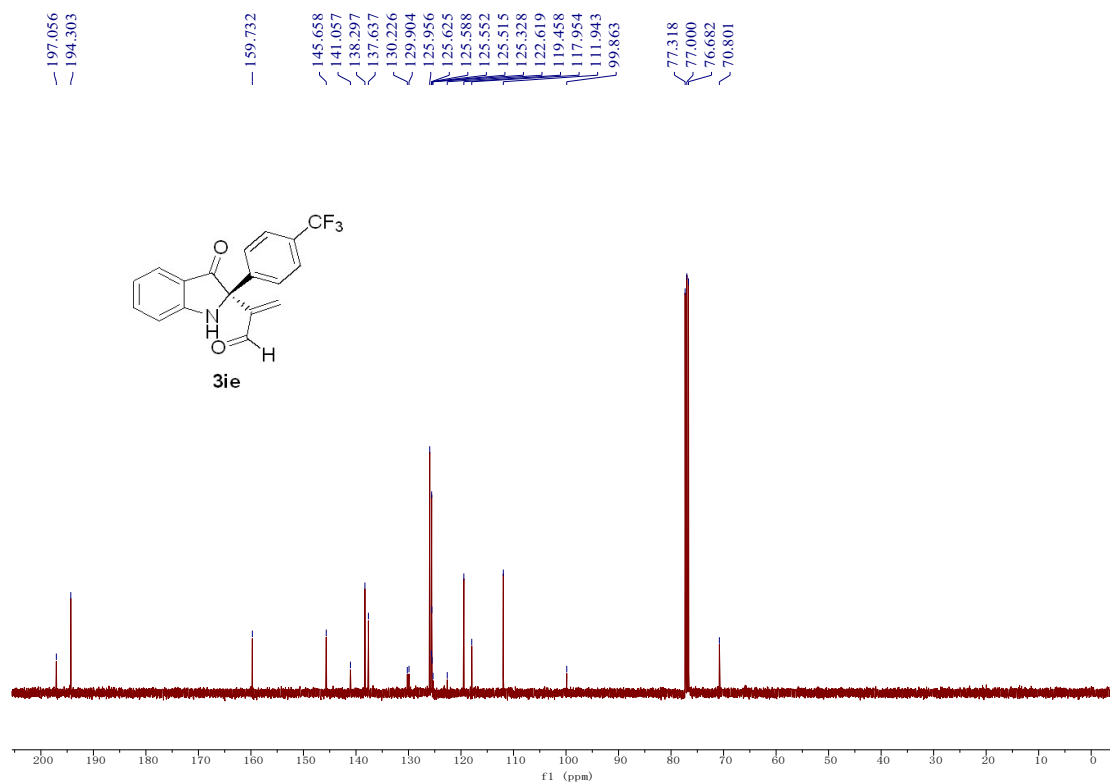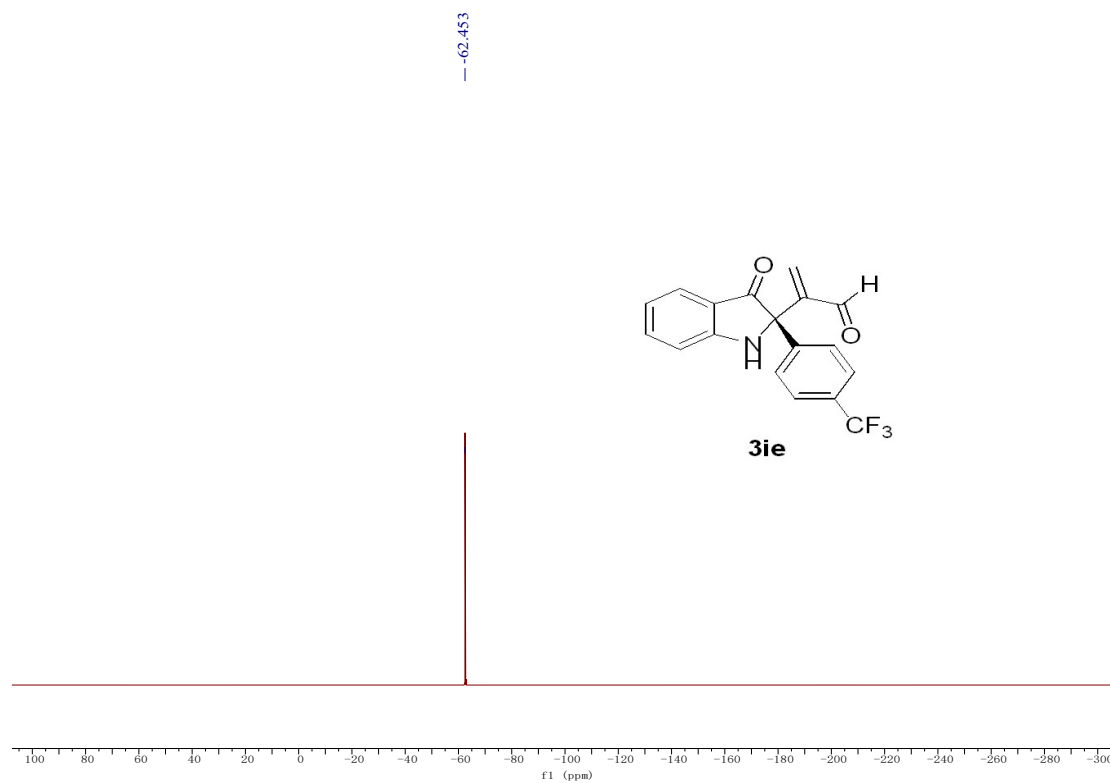

<sup>1</sup>H, <sup>13</sup>C and <sup>19</sup>F NMR spectra of compound **3ie** (400 MHz, CDCl<sub>3</sub>)

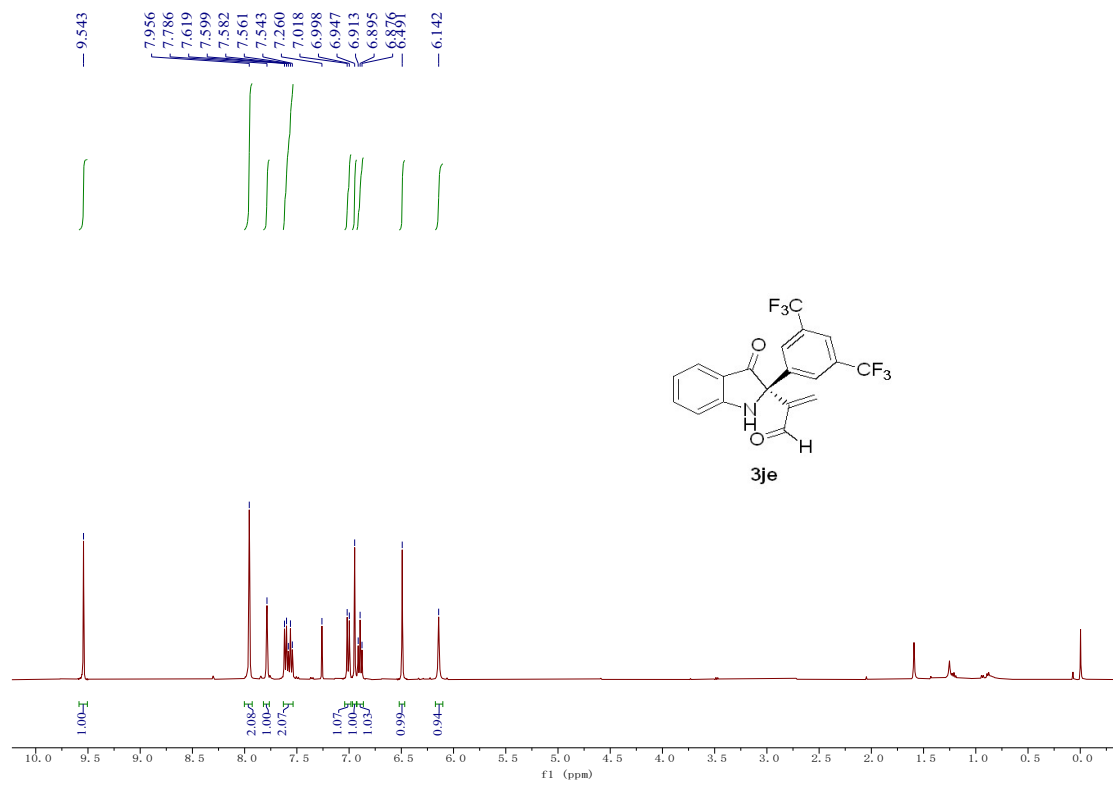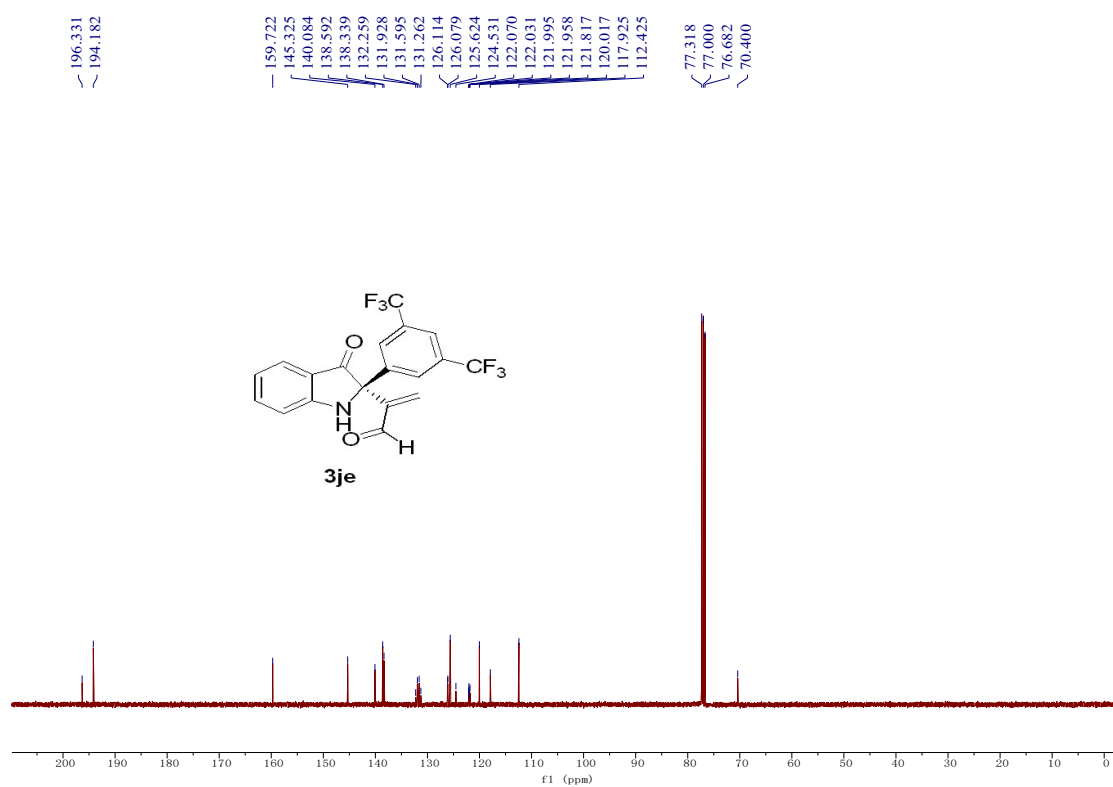

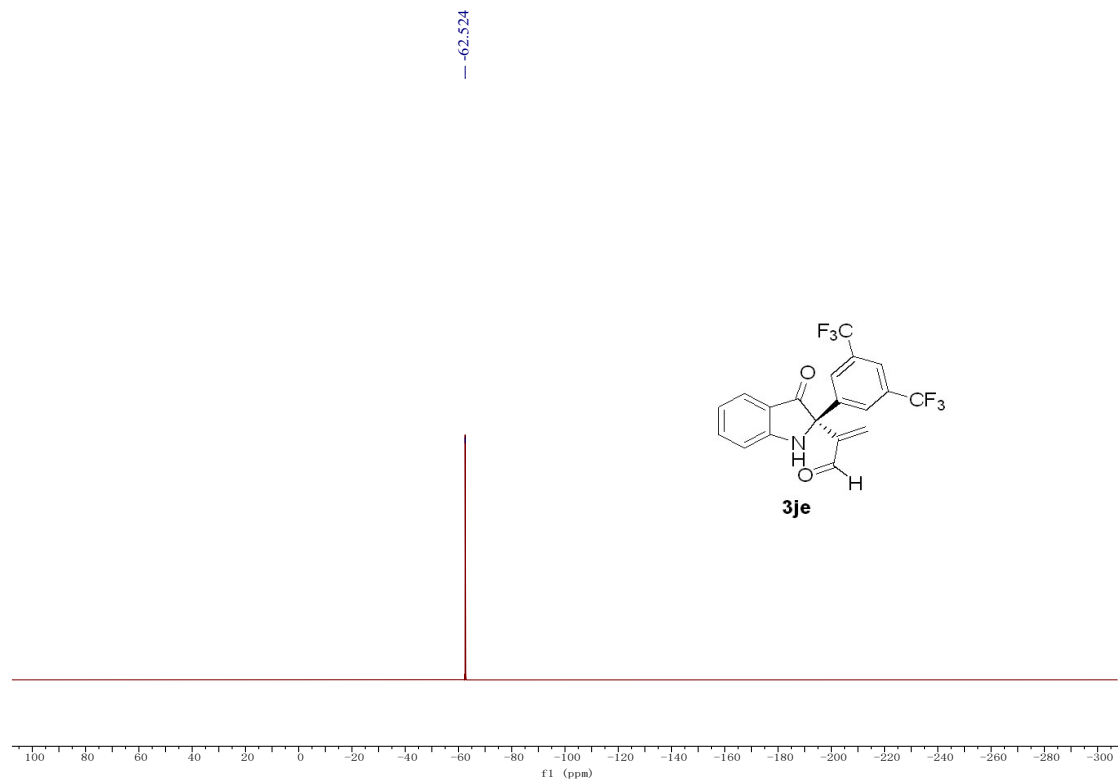

$^1\text{H}$ ,  $^{13}\text{C}$  and  $^{19}\text{F}$  NMR spectra of compound **3je** (400 MHz,  $\text{CDCl}_3$ )

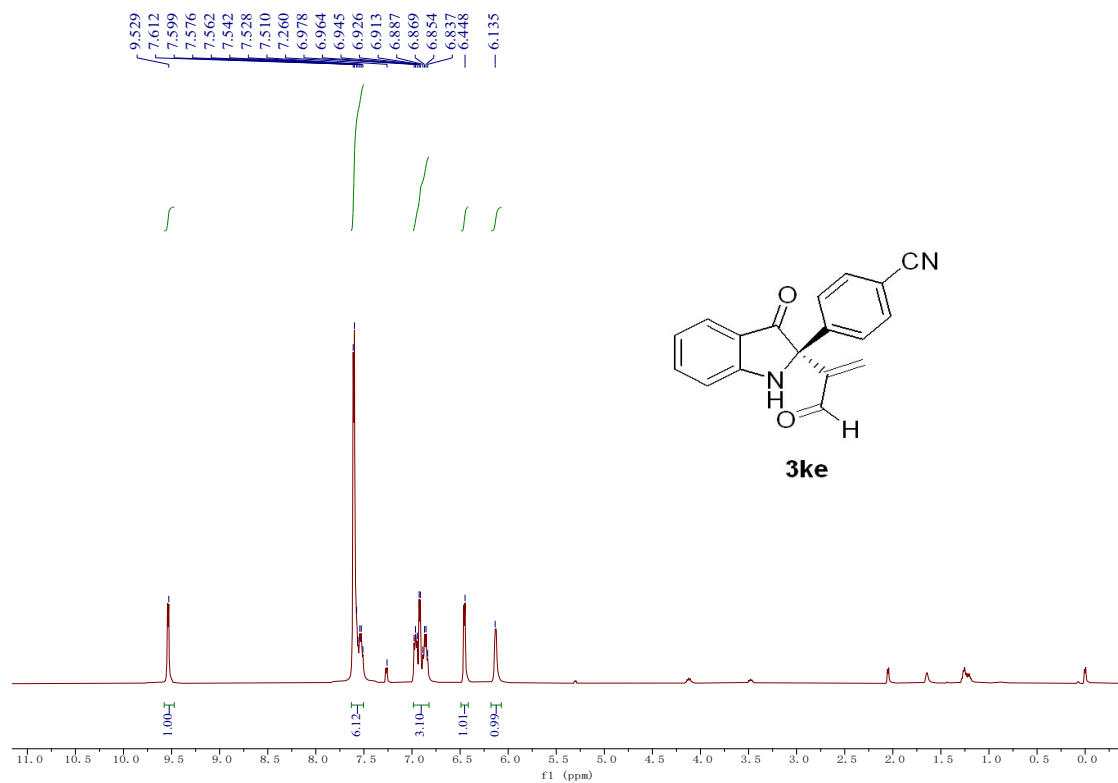

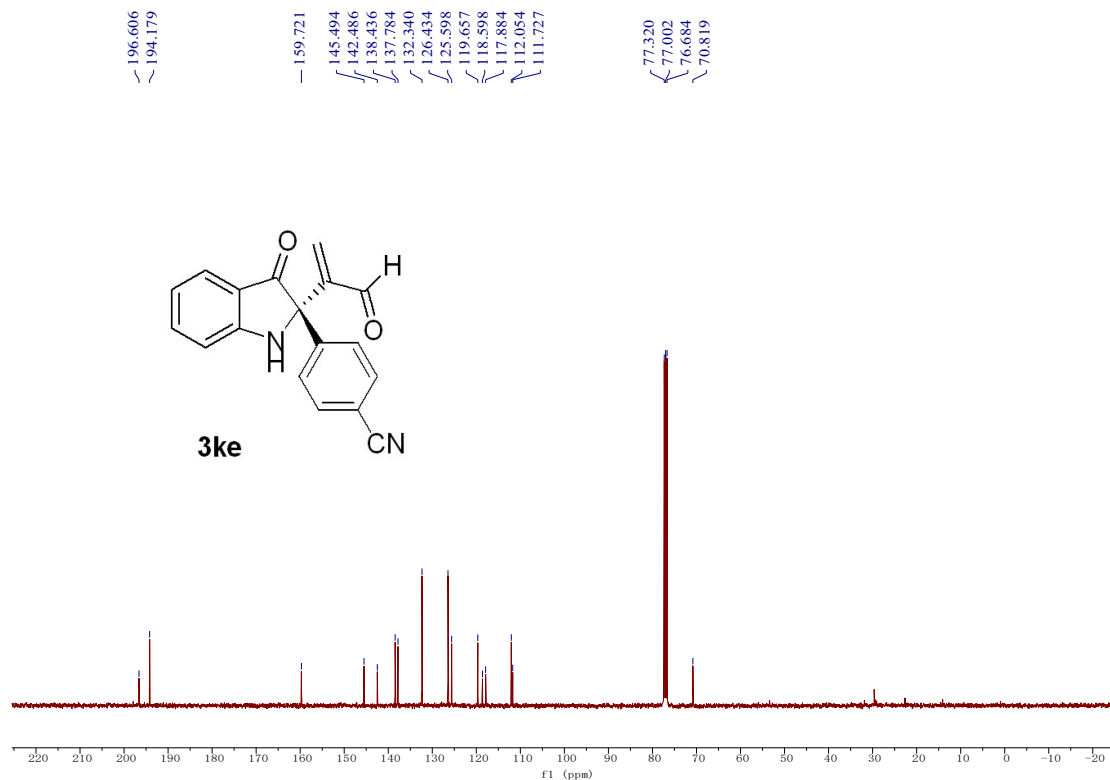

<sup>1</sup>H and <sup>13</sup>C NMR spectra of compound **3ke** (400 MHz, CDCl<sub>3</sub>)

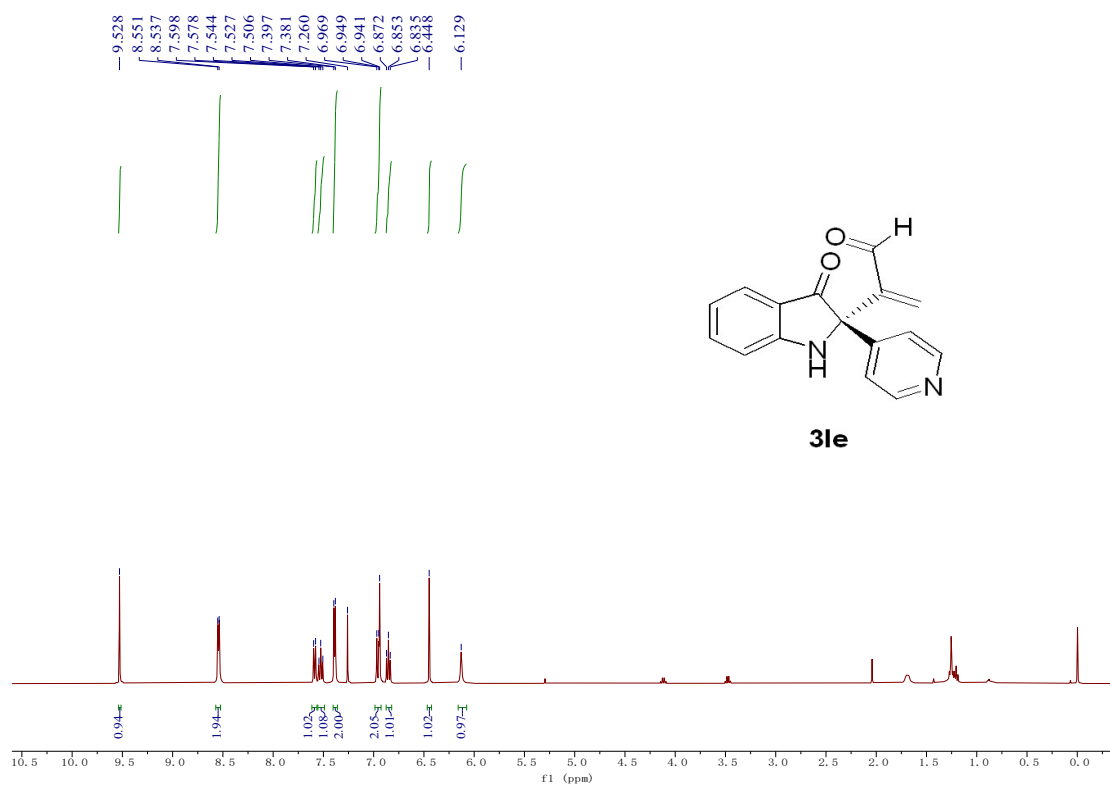

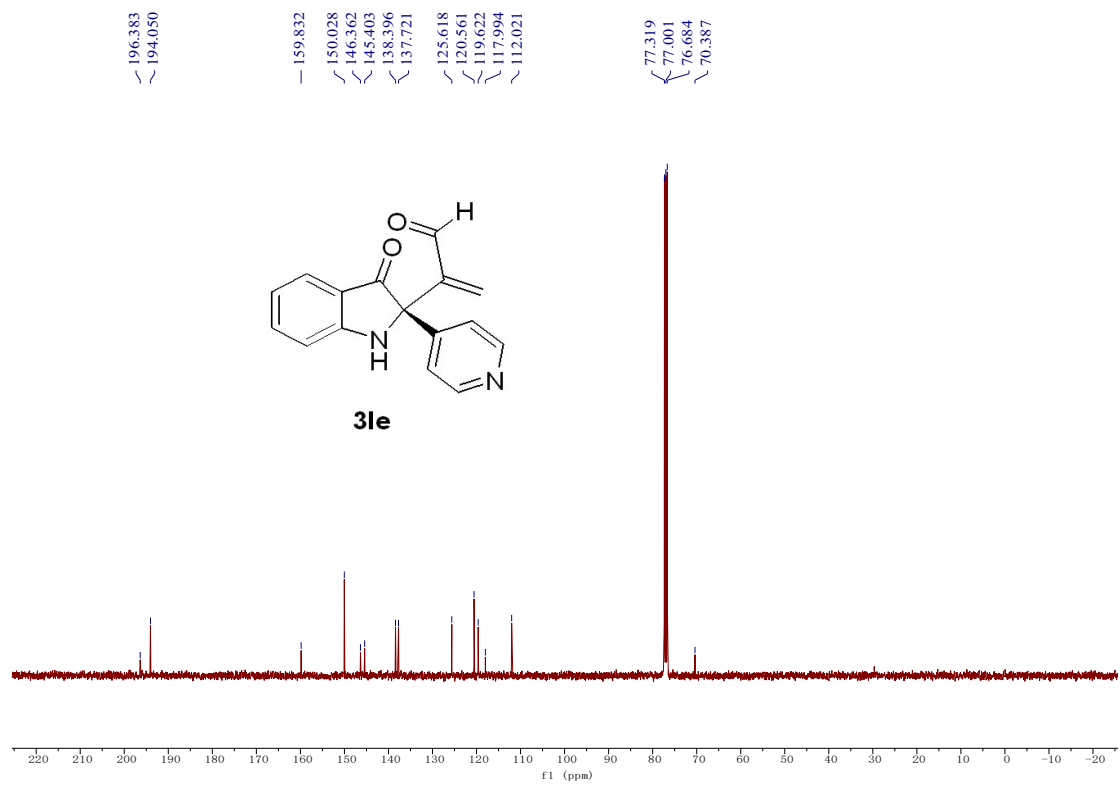

$^1\text{H}$  and  $^{13}\text{C}$  NMR spectra of compound **3le** (400 MHz,  $\text{CDCl}_3$ )

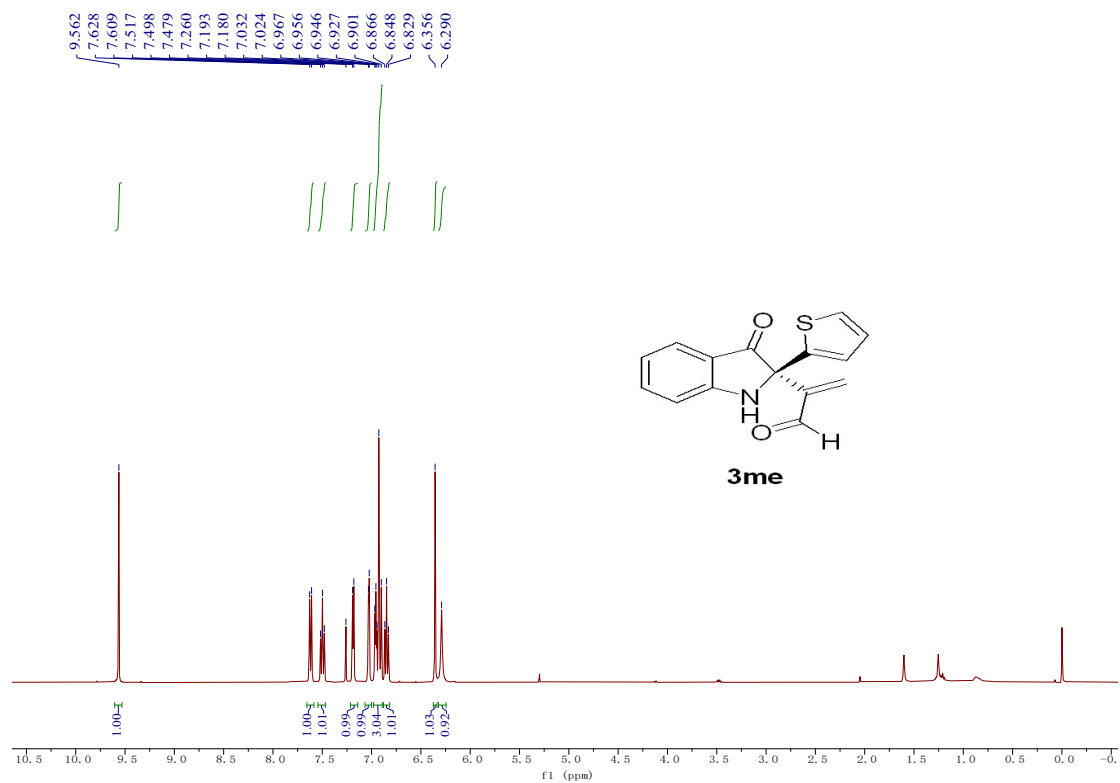

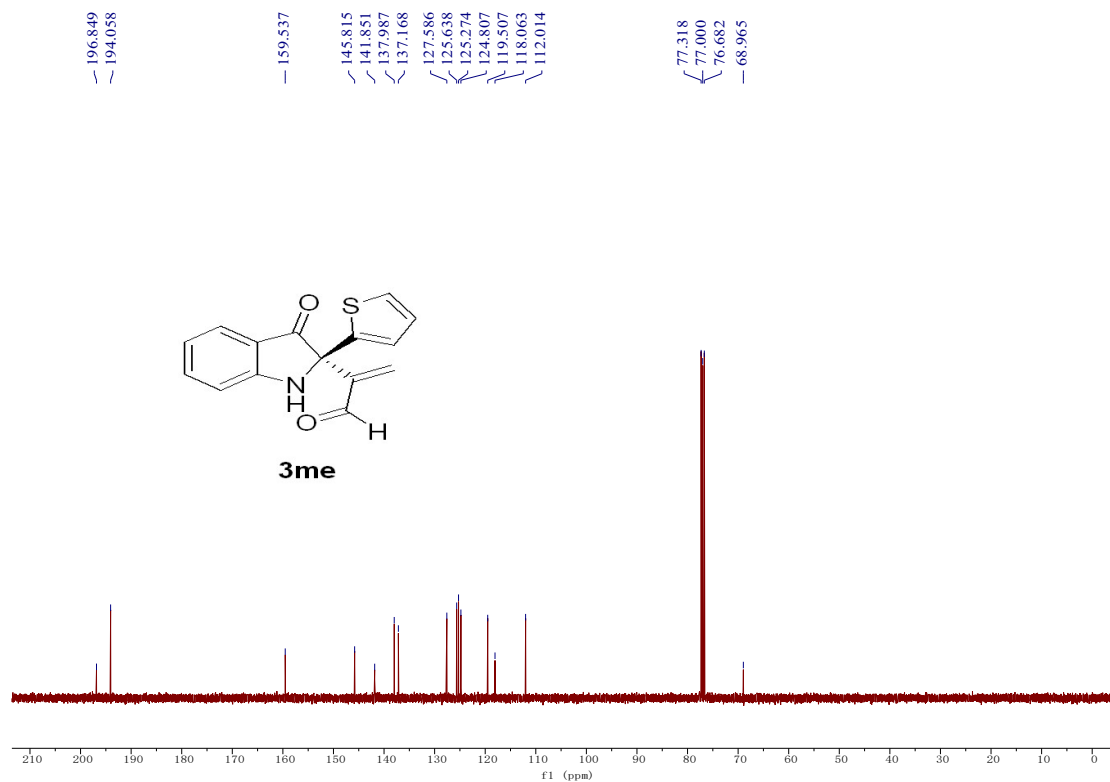

<sup>1</sup>H and <sup>13</sup>C NMR spectra of compound **3me** (400 MHz, CDCl<sub>3</sub>)

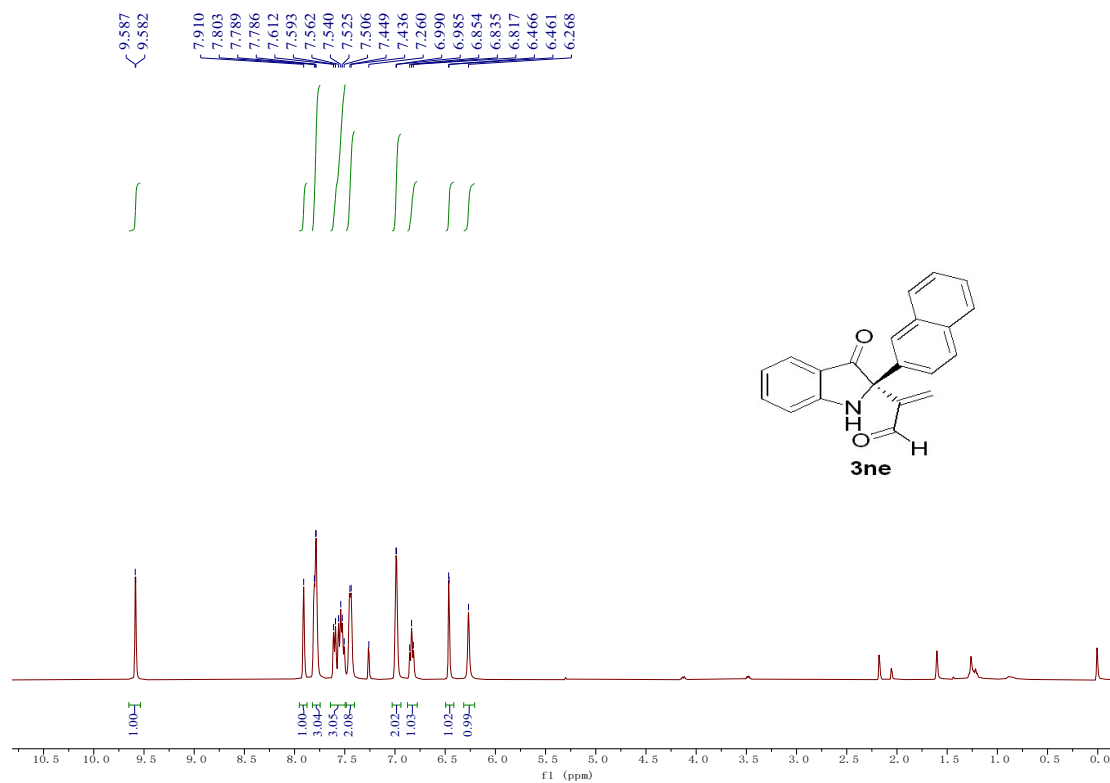

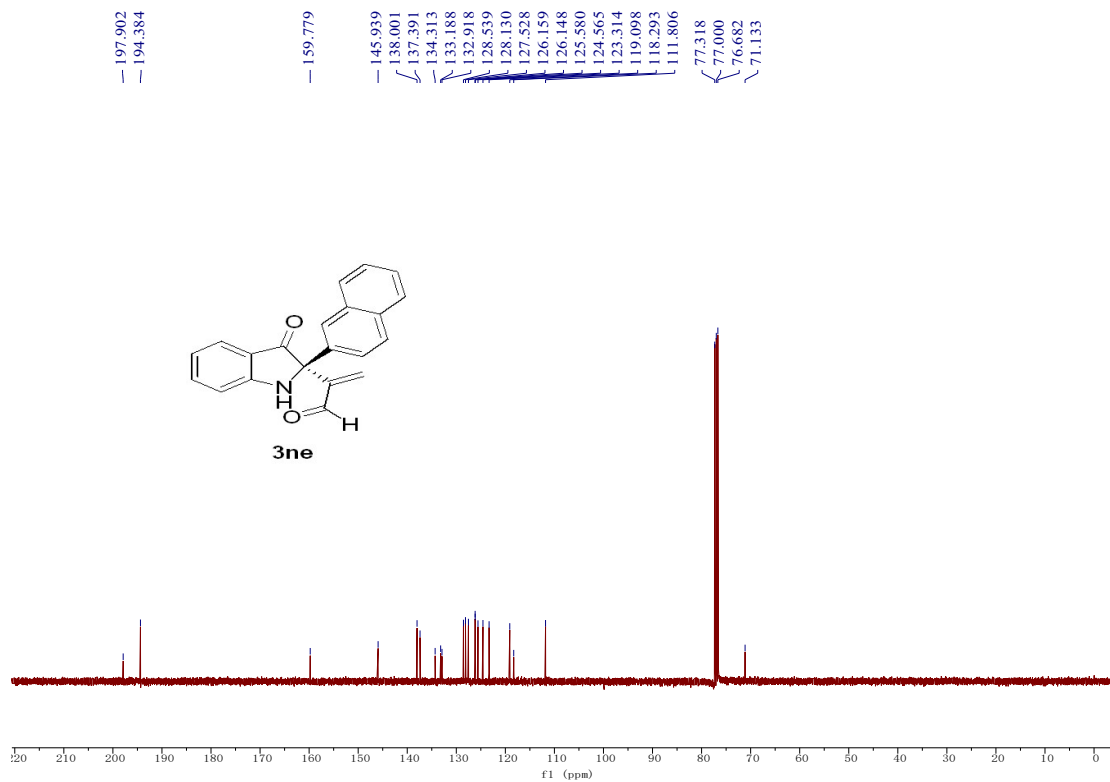

<sup>1</sup>H and <sup>13</sup>C NMR spectra of compound **3ne** (400 MHz, CDCl<sub>3</sub>)

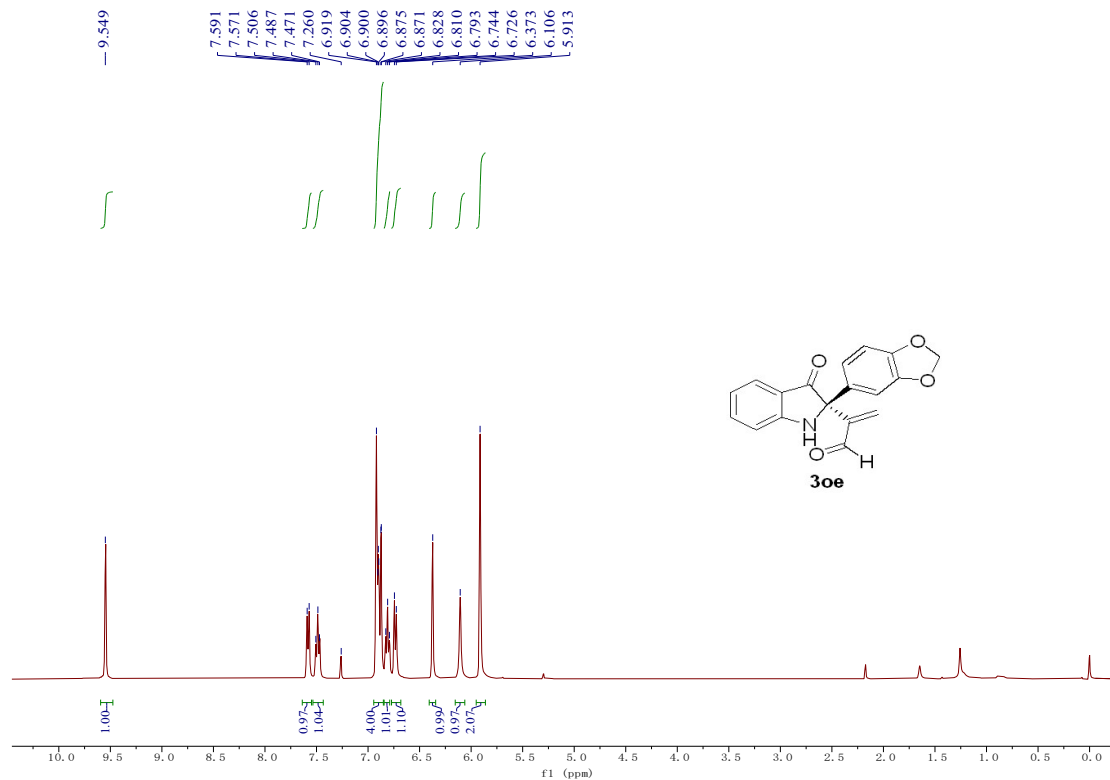

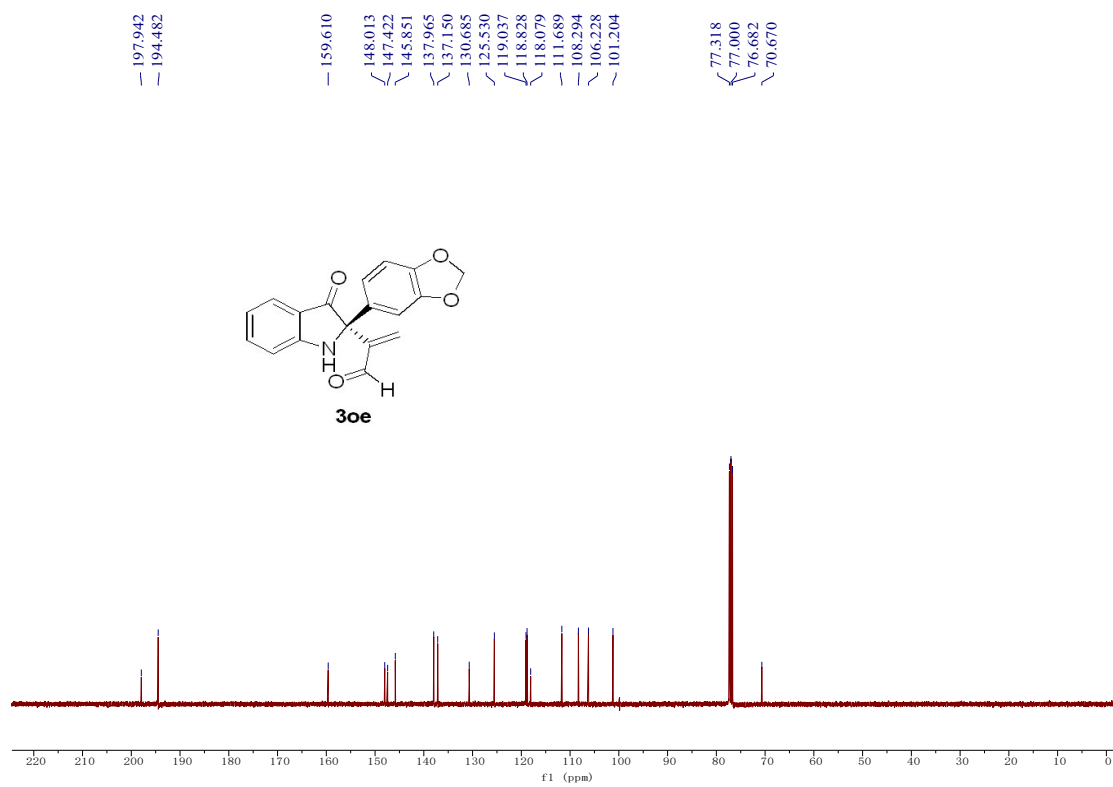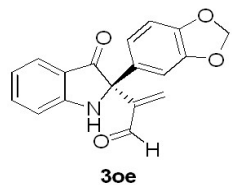

<sup>1</sup>H and <sup>13</sup>C NMR spectra of compound **3oe** (400 MHz, CDCl<sub>3</sub>)

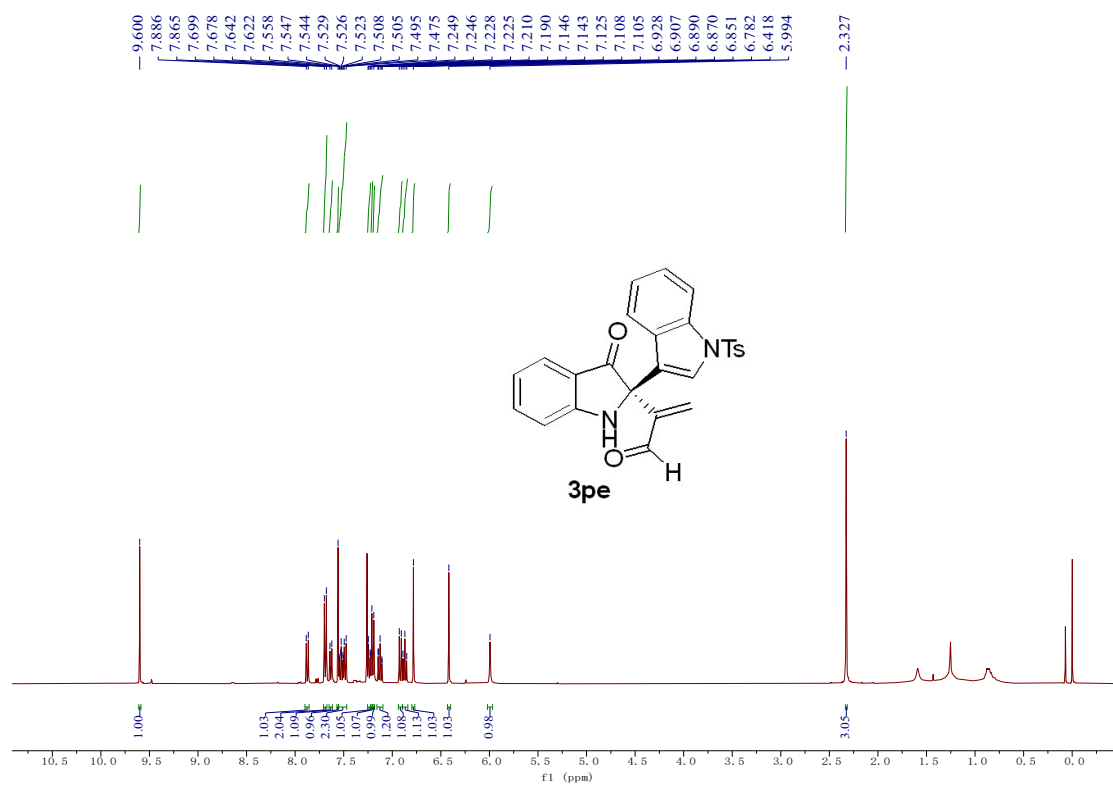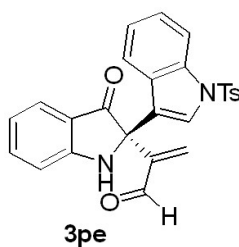



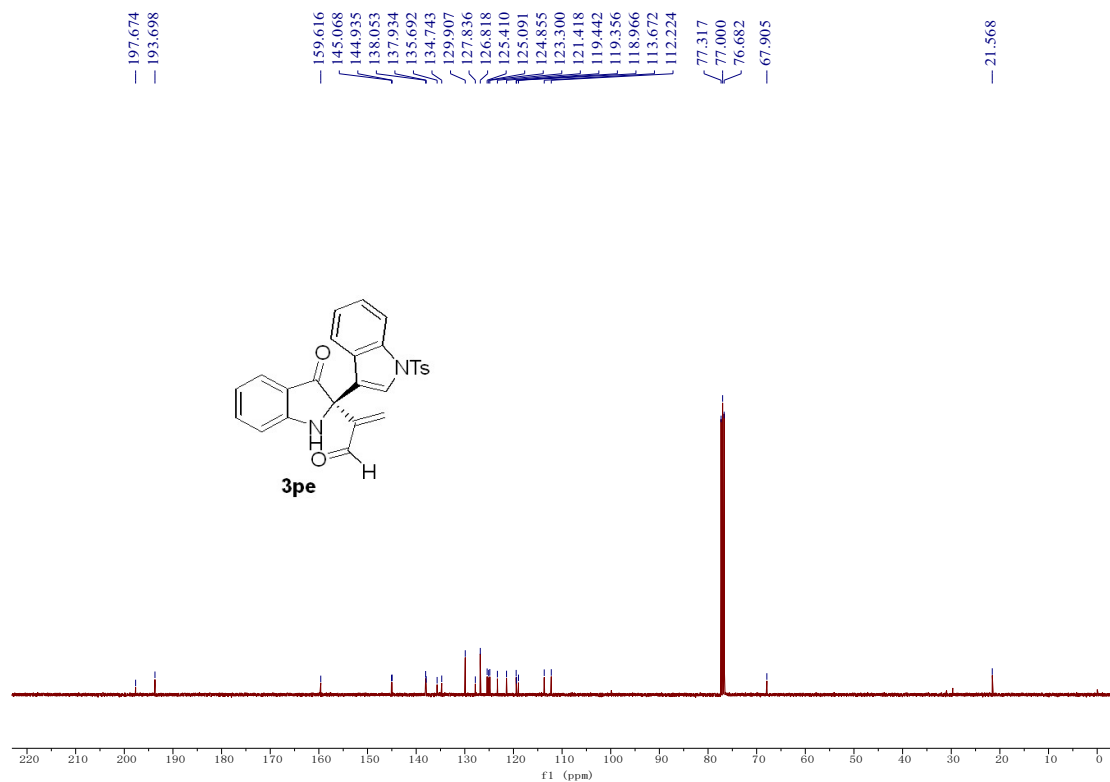

<sup>1</sup>H and <sup>13</sup>C NMR spectra of compound **3pe** (400 MHz, CDCl<sub>3</sub>)

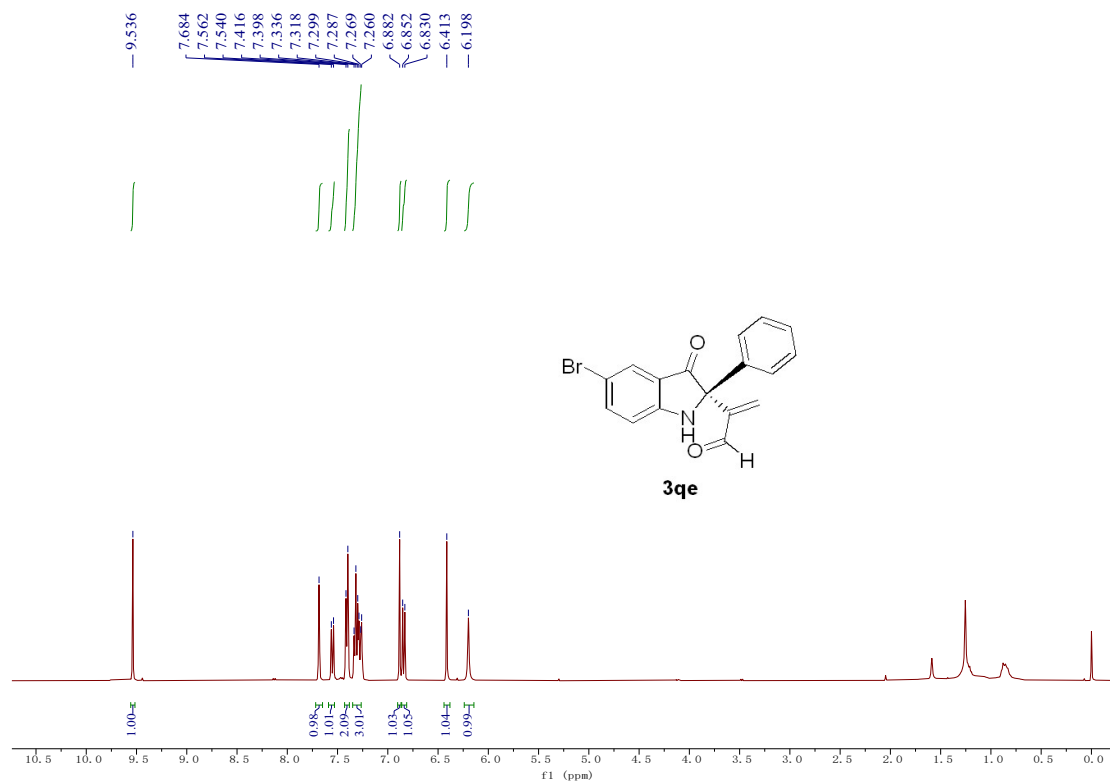

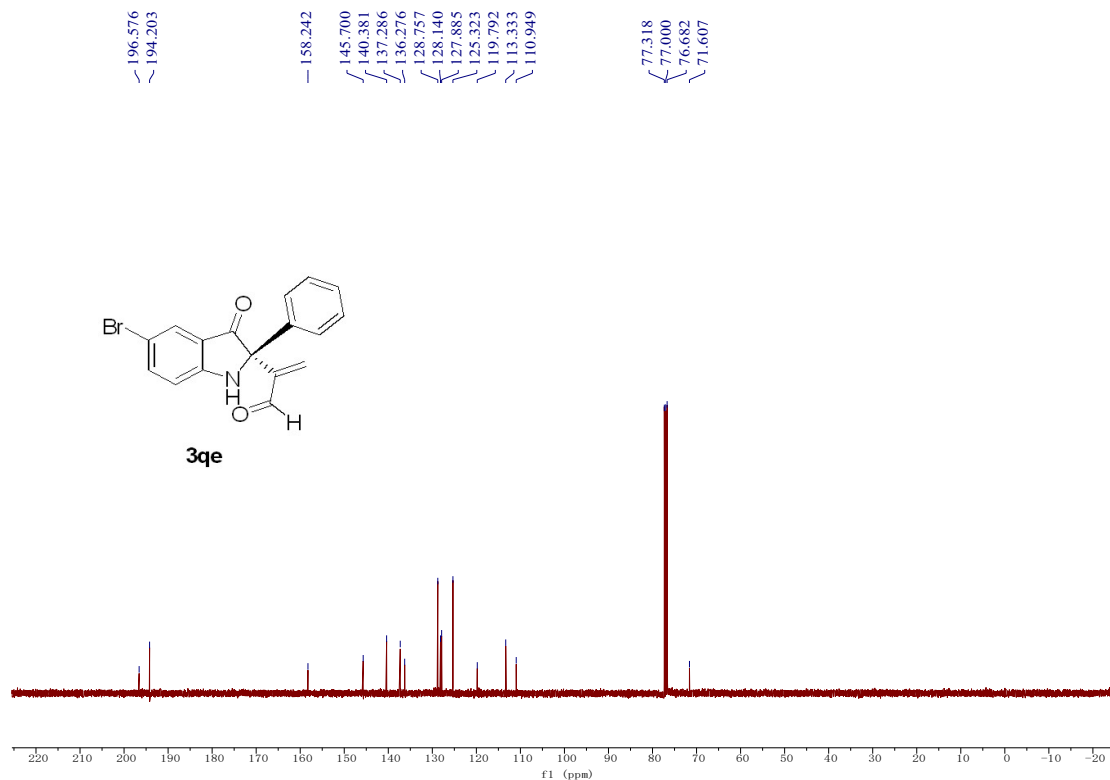

$^1\text{H}$  and  $^{13}\text{C}$  NMR spectra of compound **3qe** (400 MHz,  $\text{CDCl}_3$ )

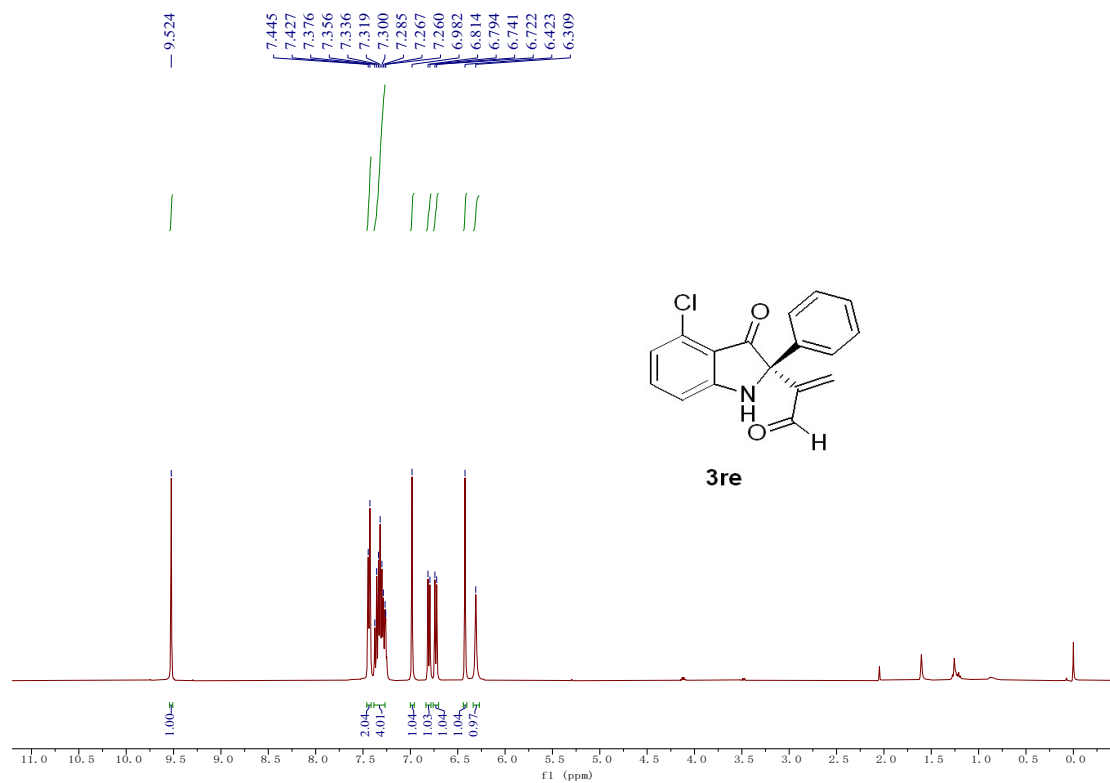

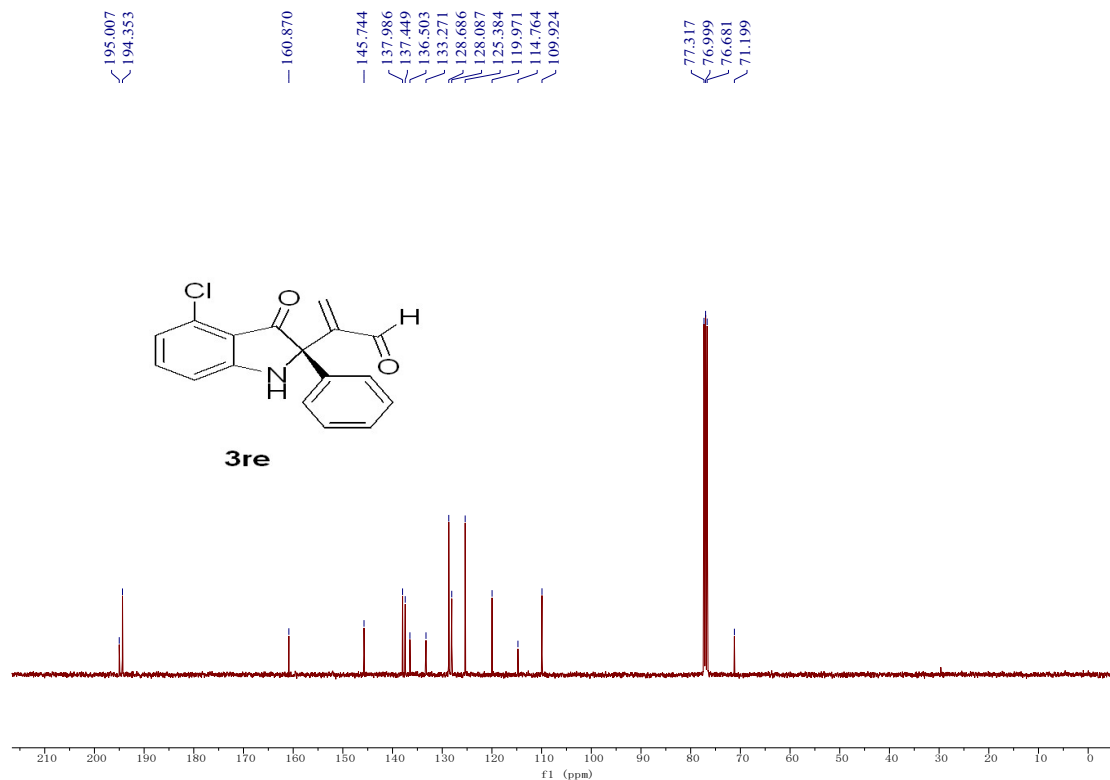

<sup>1</sup>H and <sup>13</sup>C NMR spectra of compound **3re** (400 MHz, CDCl<sub>3</sub>)

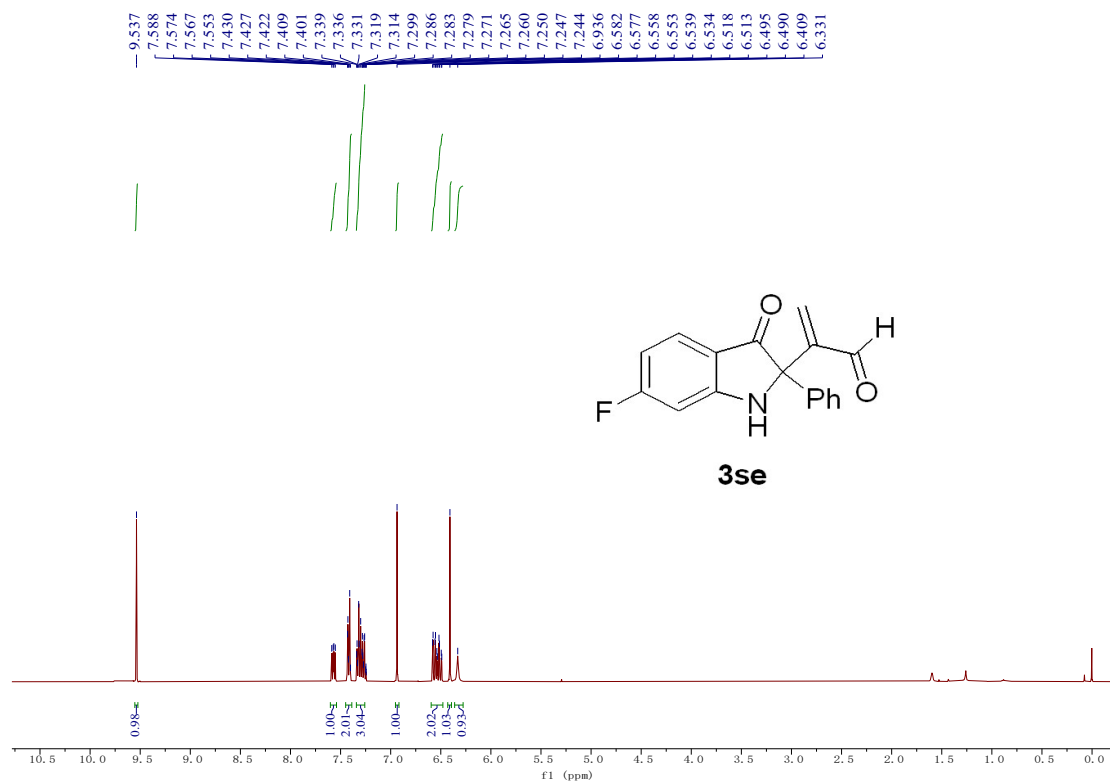

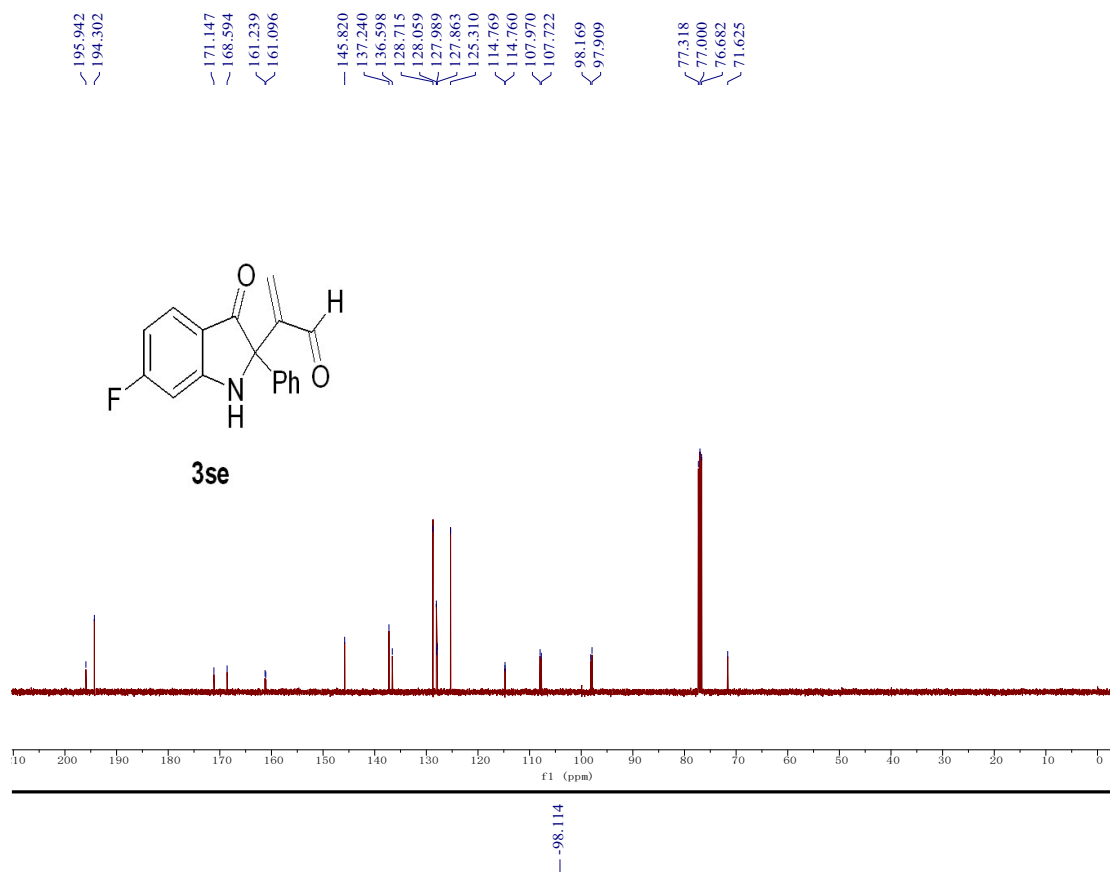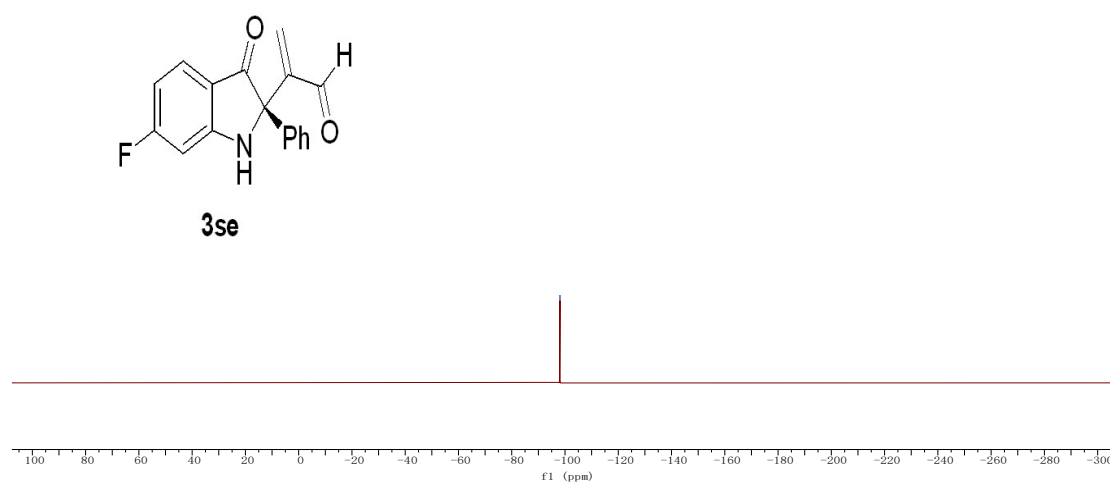

<sup>1</sup>H, <sup>13</sup>C and <sup>19</sup>F NMR spectra of compound **3se** (400 MHz, CDCl<sub>3</sub>)

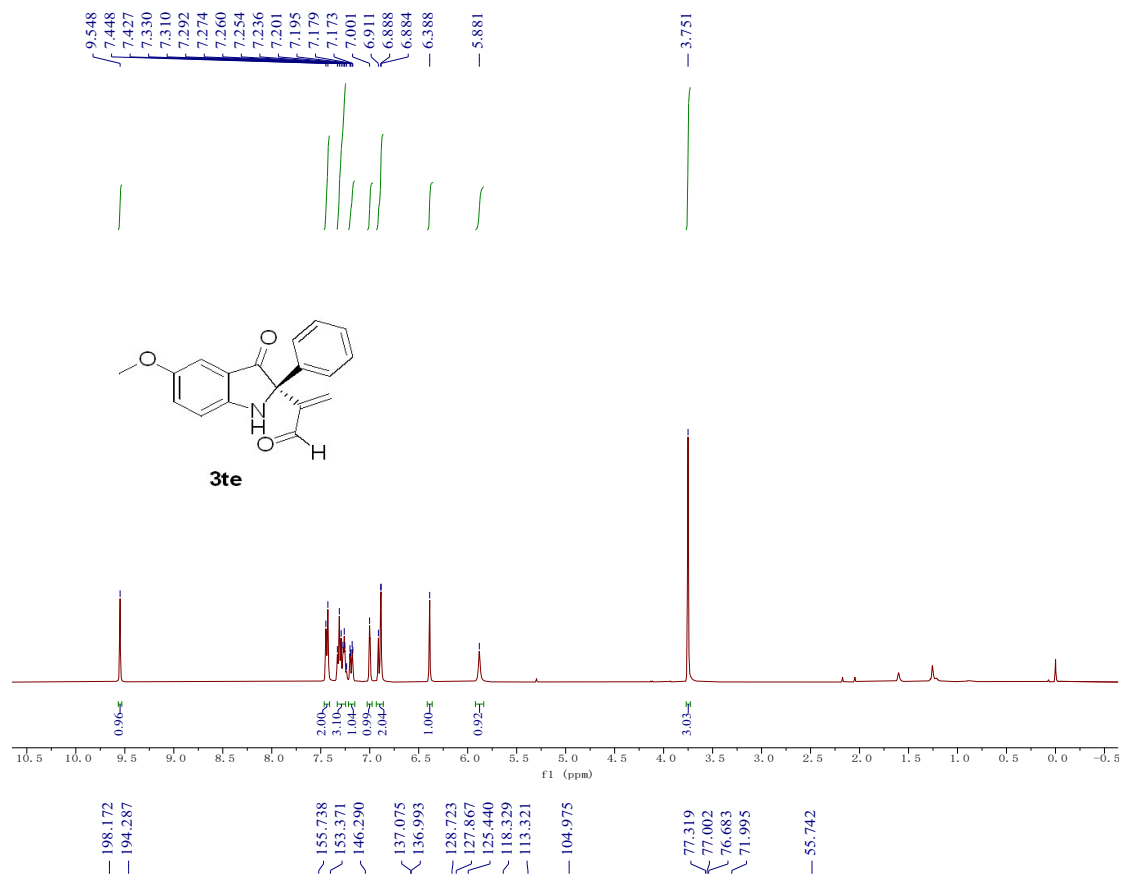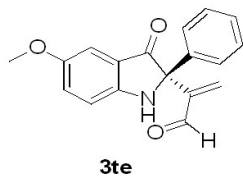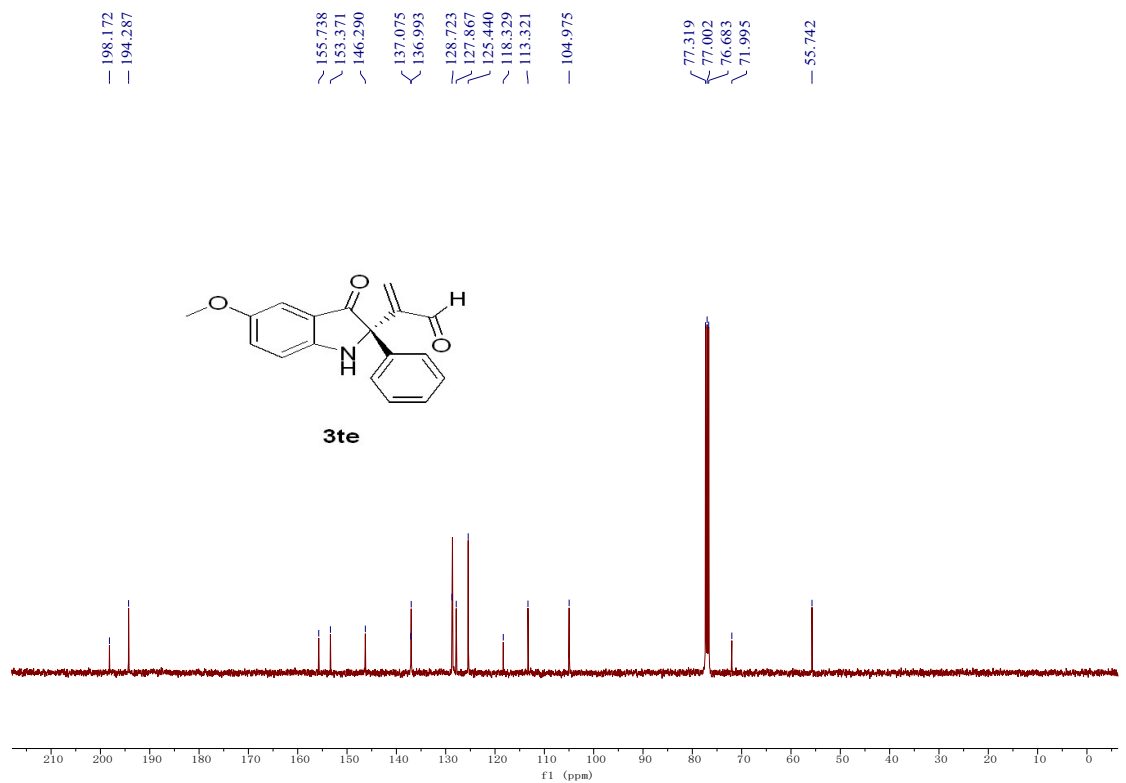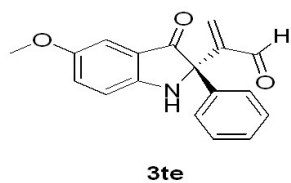

<sup>1</sup>H and <sup>13</sup>C NMR spectra of compound **3te** (400 MHz, CDCl<sub>3</sub>)

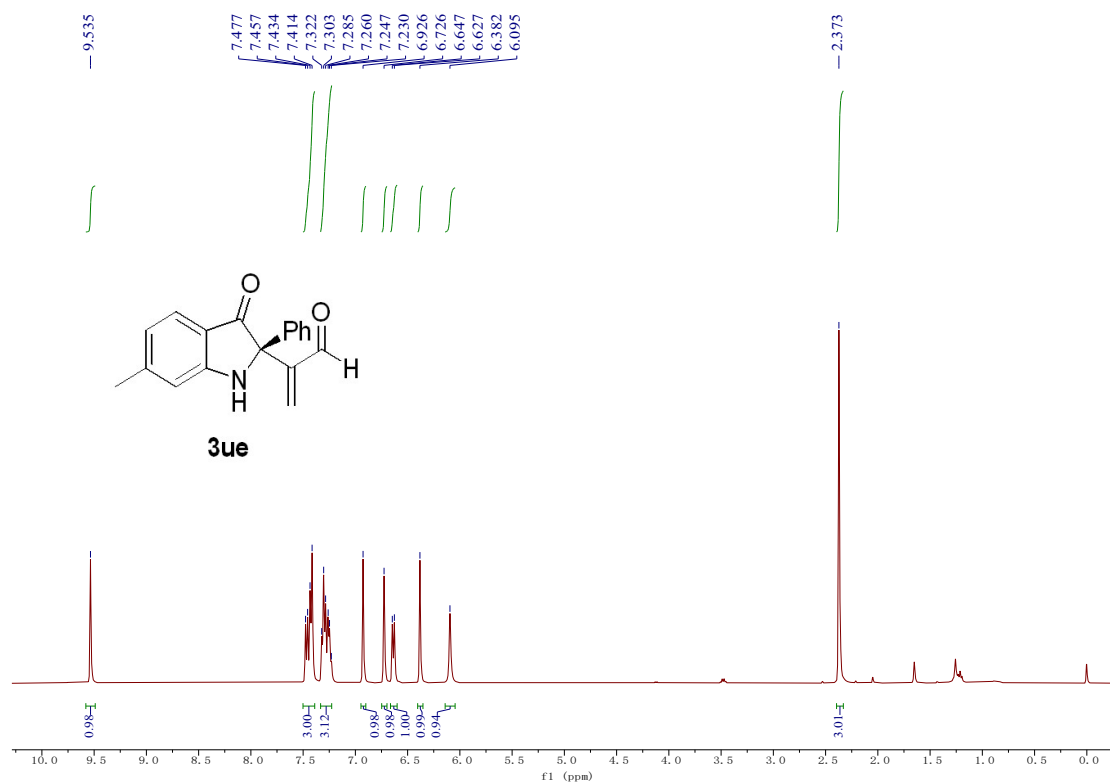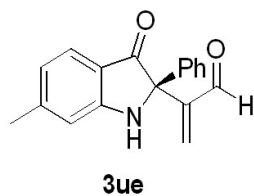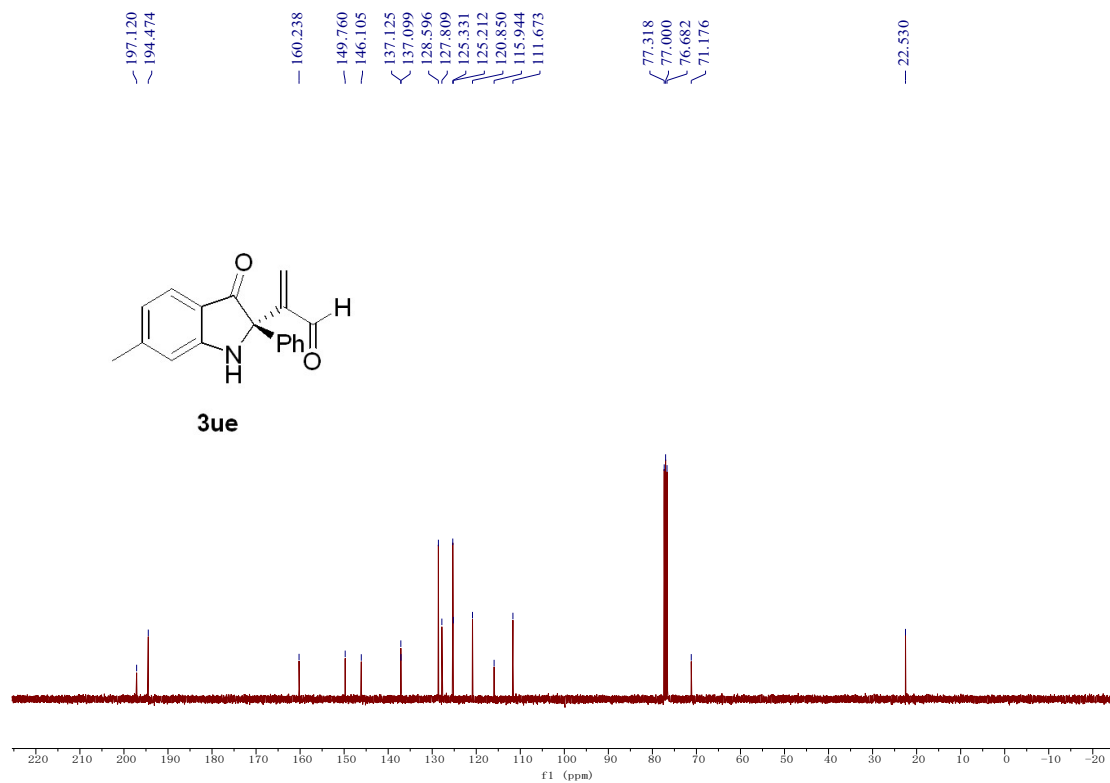

**<sup>1</sup>H and <sup>13</sup>C NMR spectra of compound 3ue (400 MHz, CDCl<sub>3</sub>)**

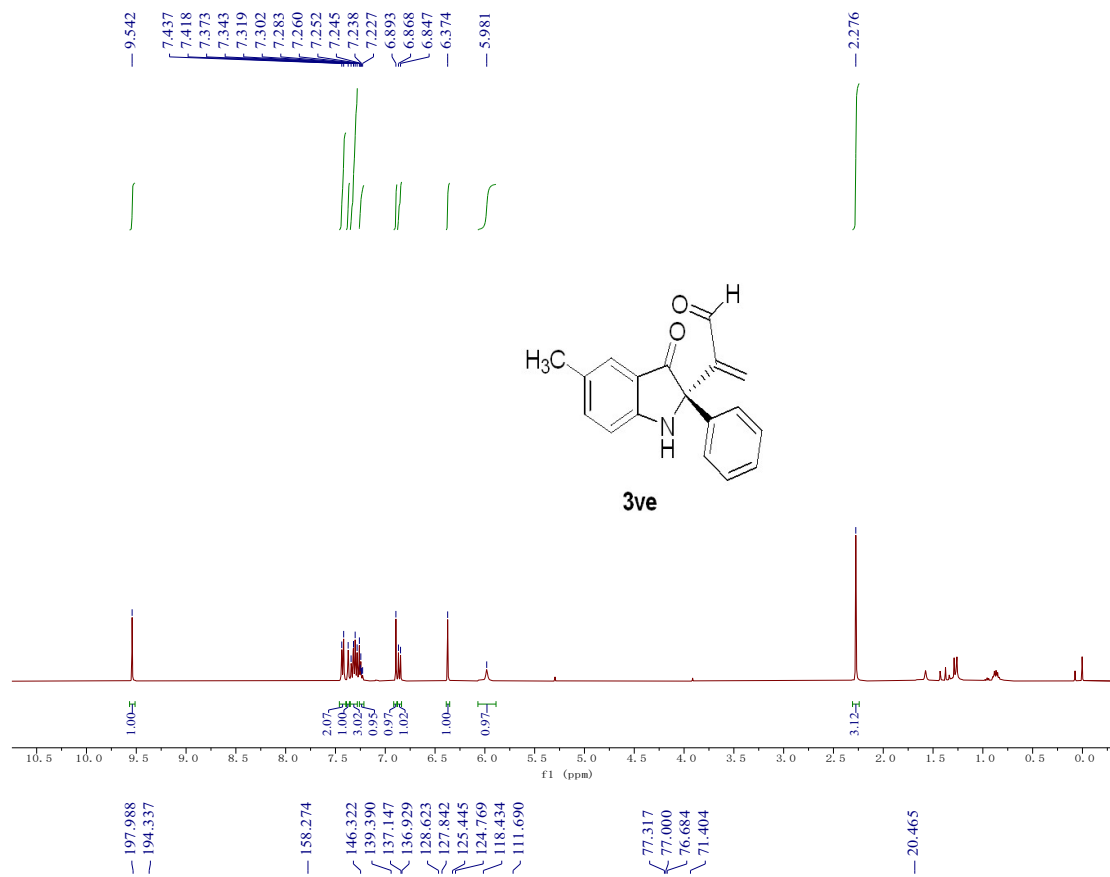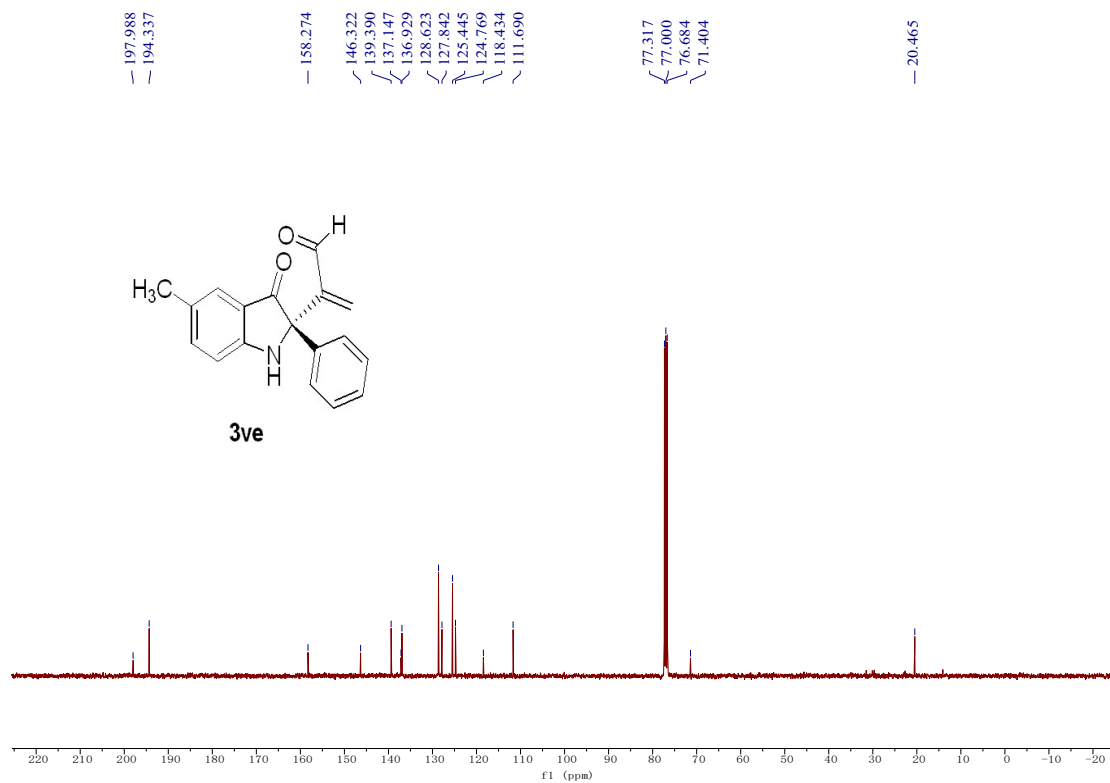

<sup>1</sup>H and <sup>13</sup>C NMR spectra of compound **3ve** (400 MHz, CDCl<sub>3</sub>)

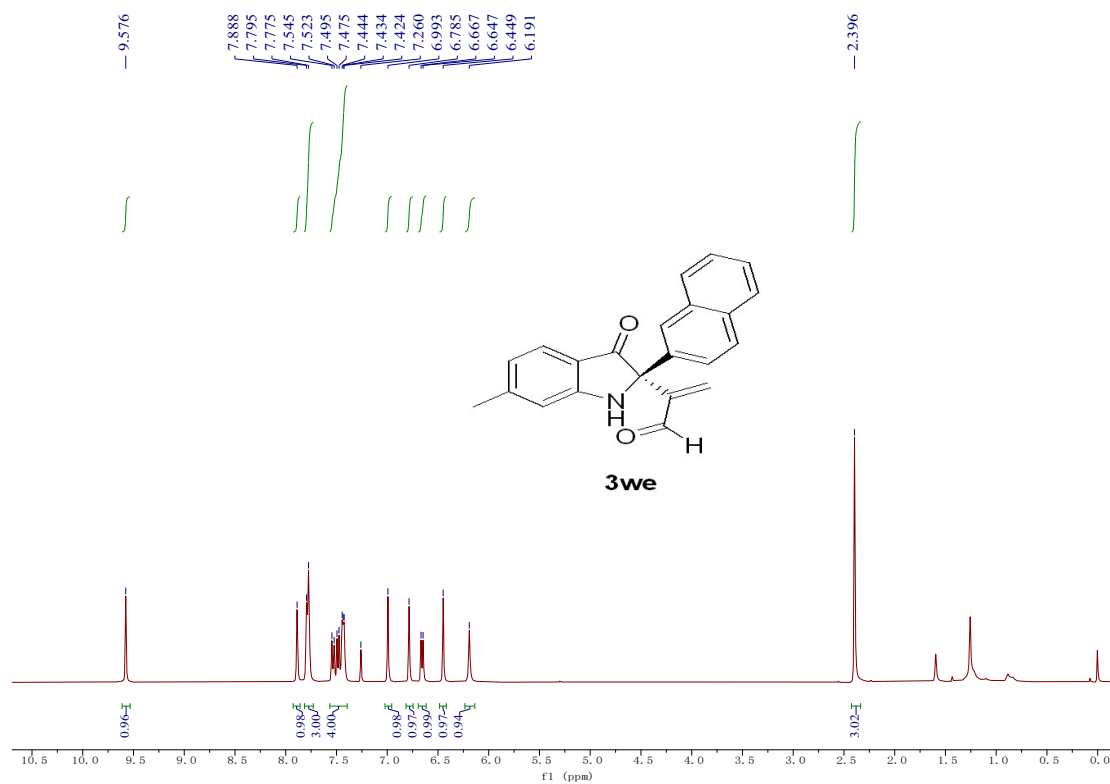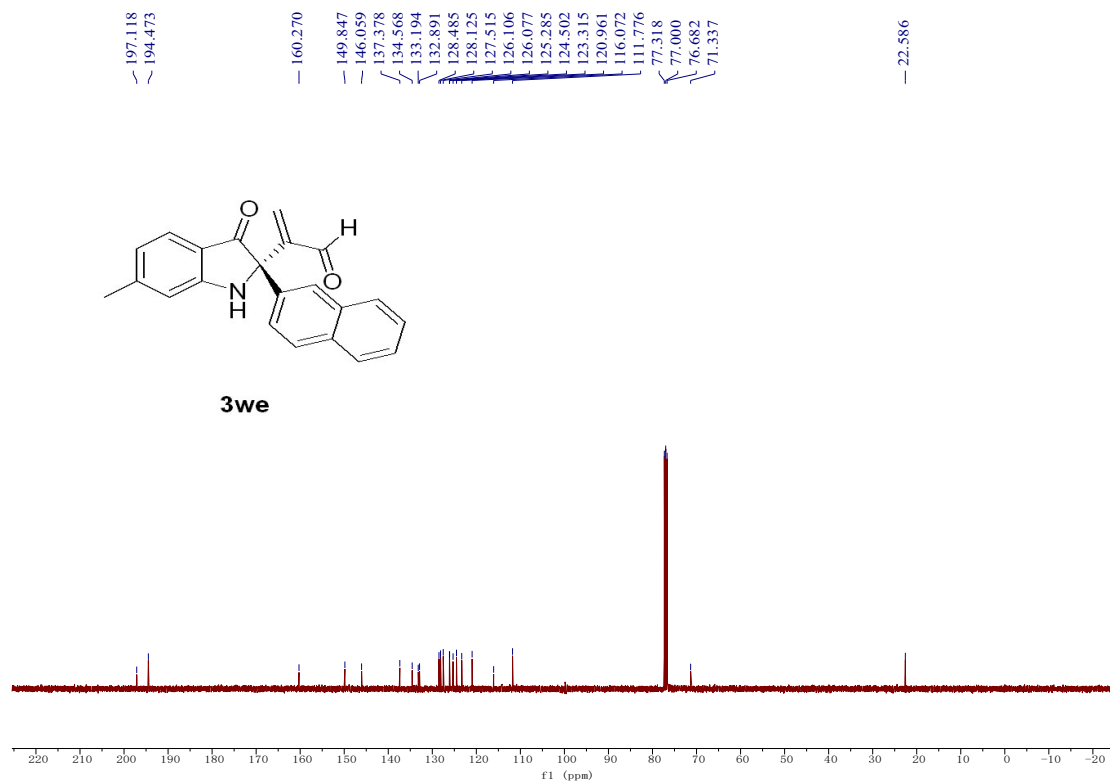

<sup>1</sup>H and <sup>13</sup>C NMR spectra of compound **3we** (400 MHz, CDCl<sub>3</sub>)



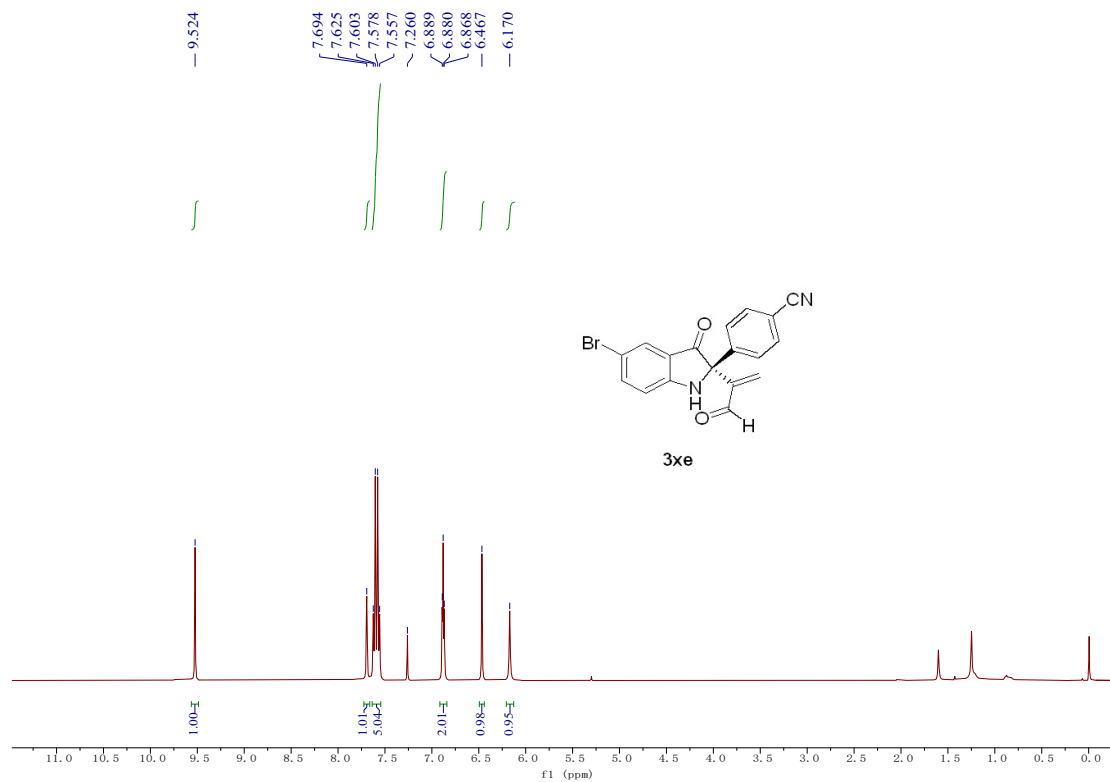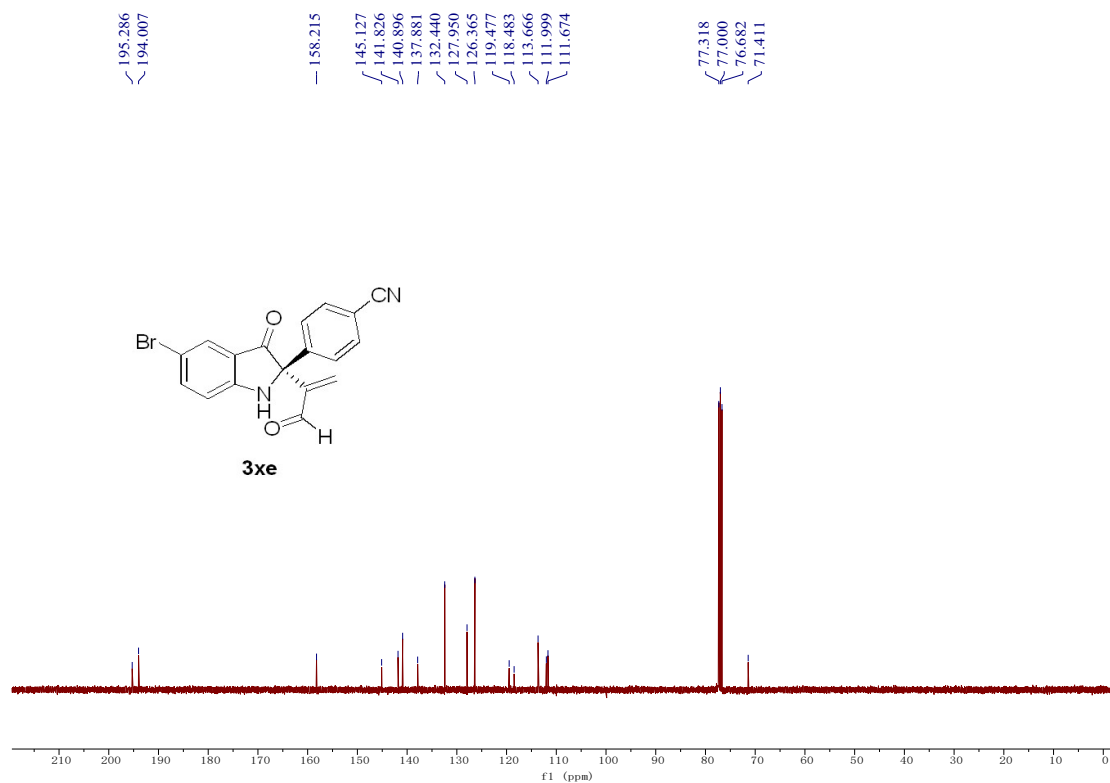

<sup>1</sup>H and <sup>13</sup>C NMR spectra of compound **3xe** (400 MHz, CDCl<sub>3</sub>)

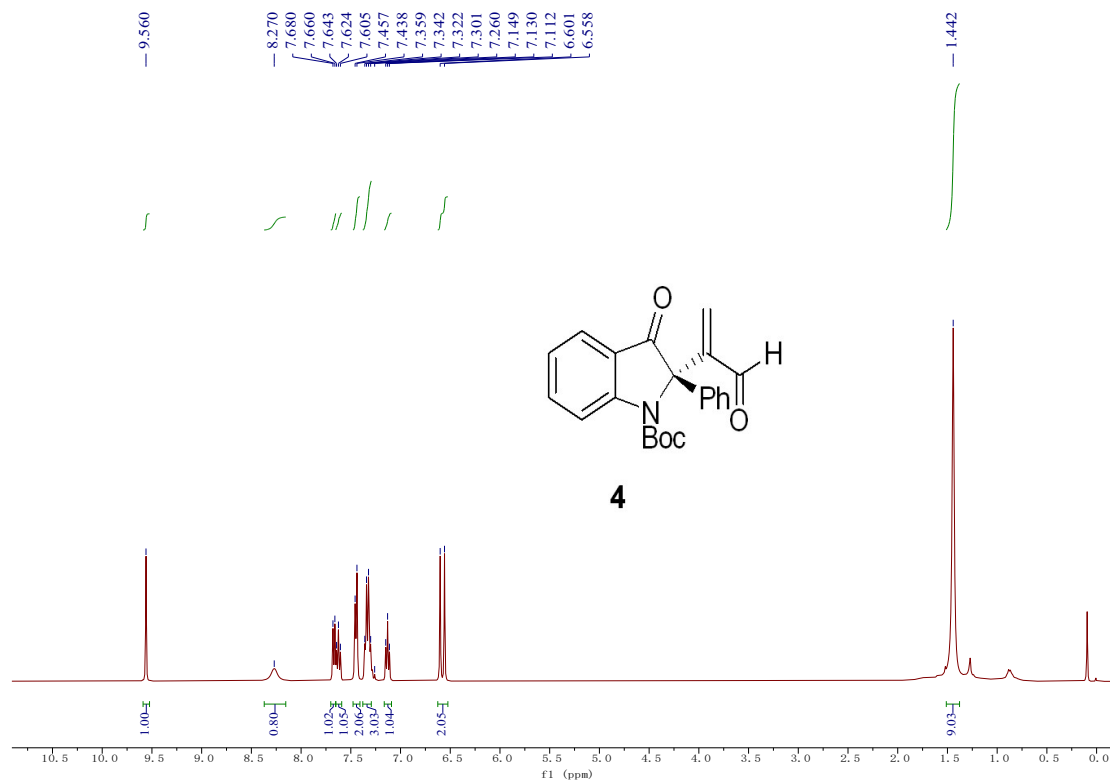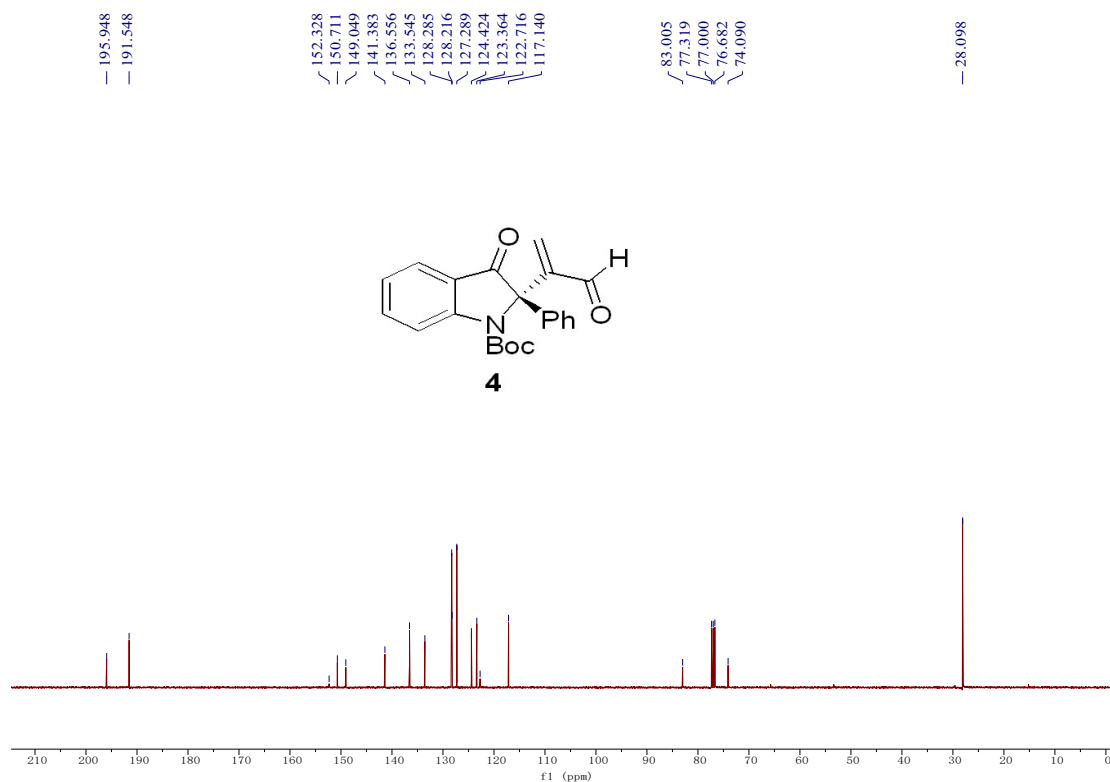

$^1\text{H}$  and  $^{13}\text{C}$  NMR spectra of compound 4 (400 MHz,  $\text{CDCl}_3$ )

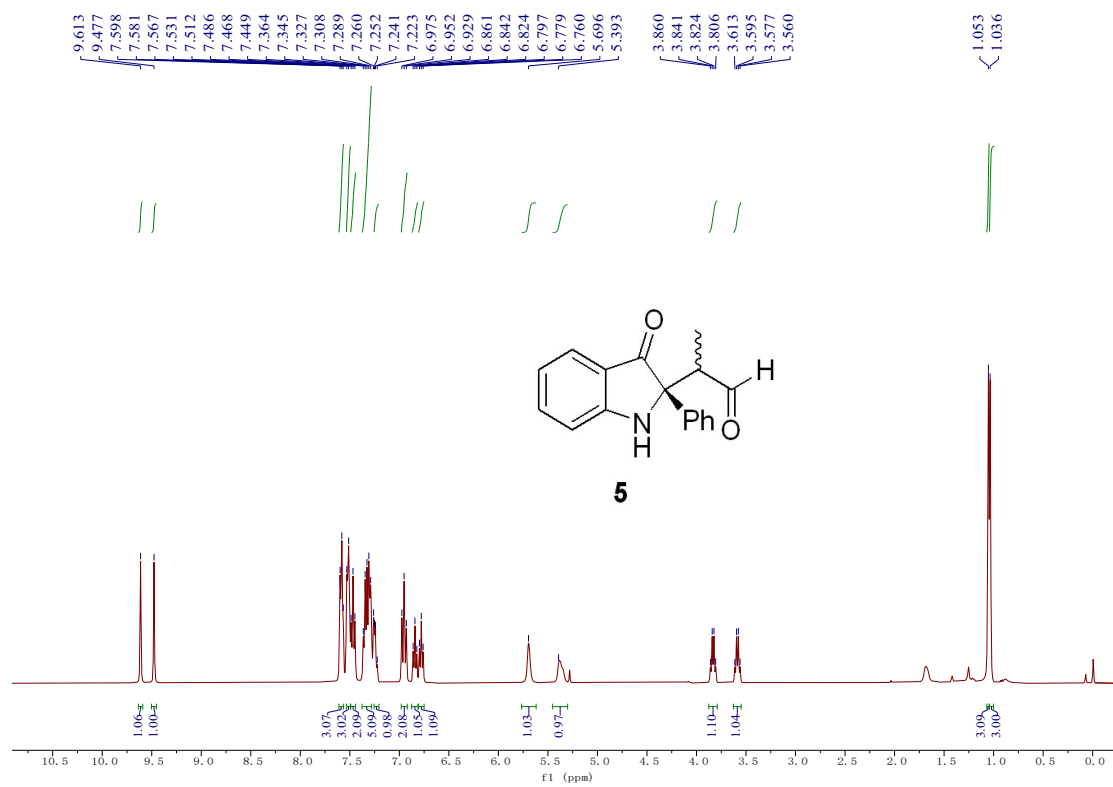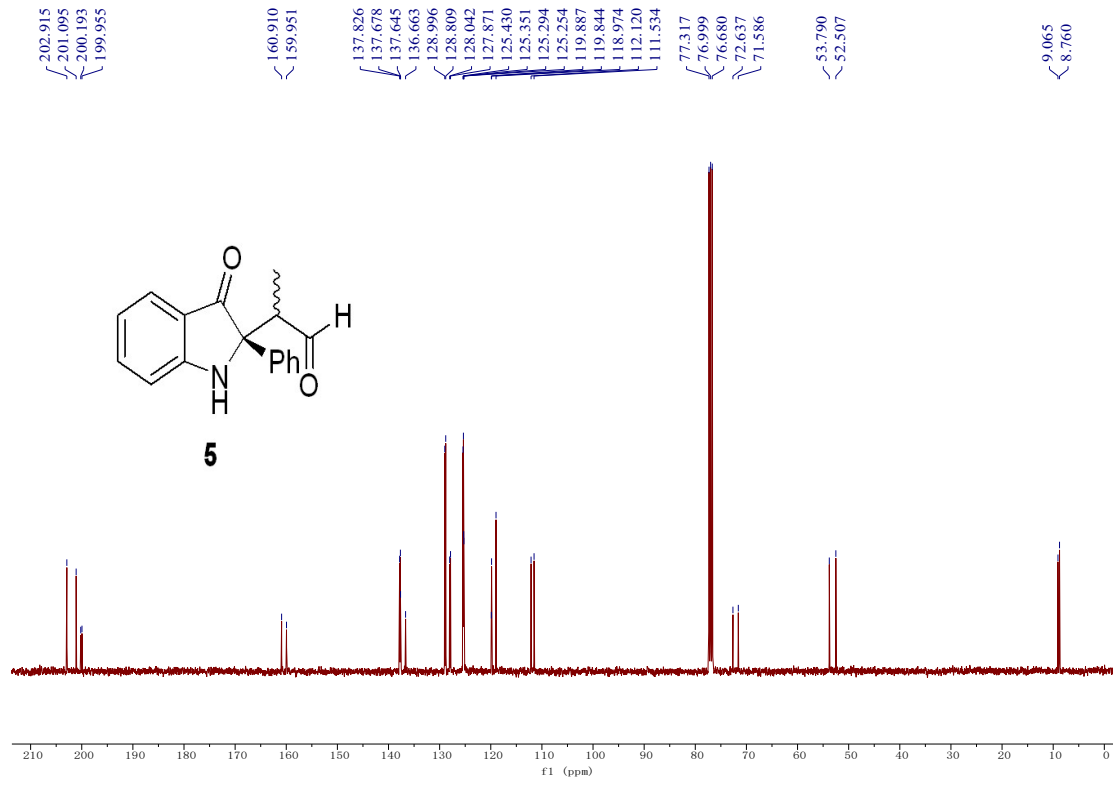

<sup>1</sup>H and <sup>13</sup>C NMR spectra of compound 5 (400 MHz, CDCl<sub>3</sub>)

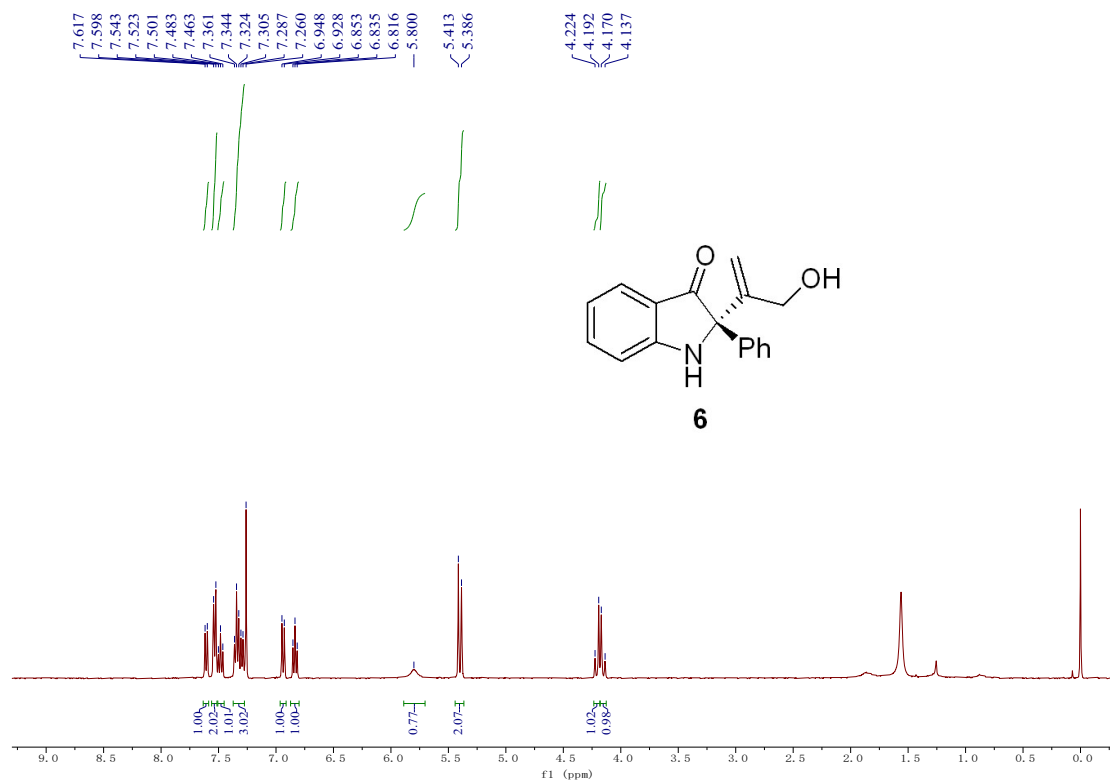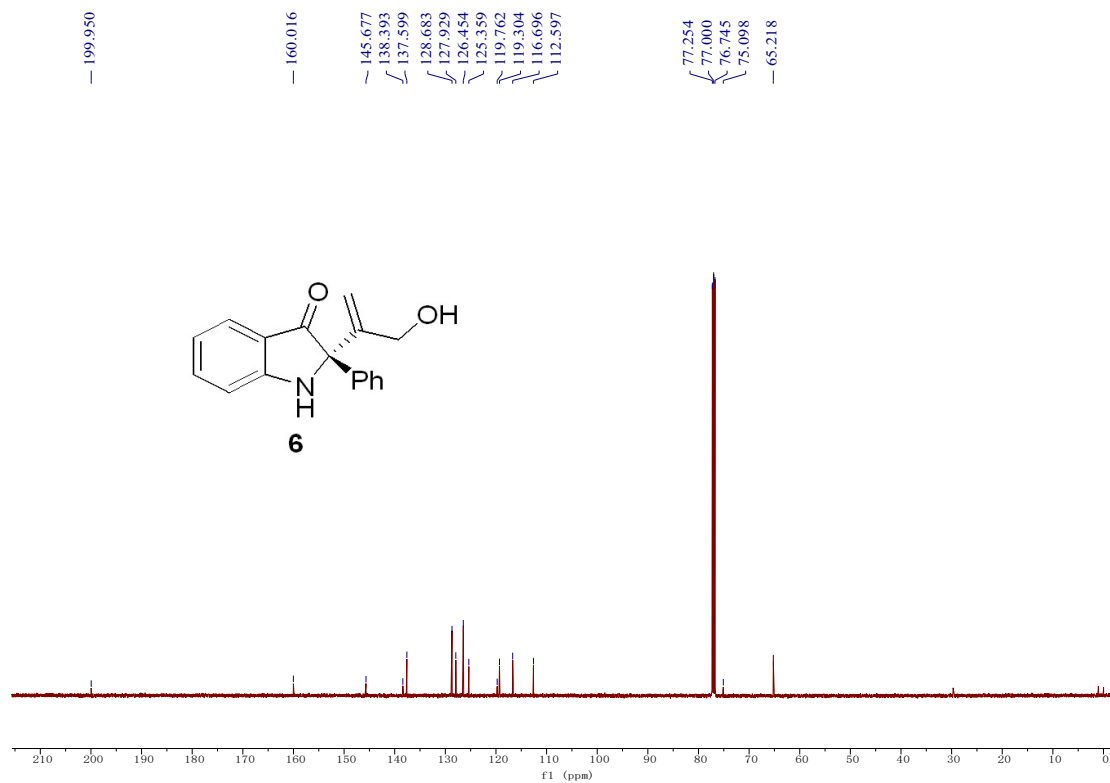

<sup>1</sup>H and <sup>13</sup>C NMR spectra of compound 6 (400 MHz, CDCl<sub>3</sub>)

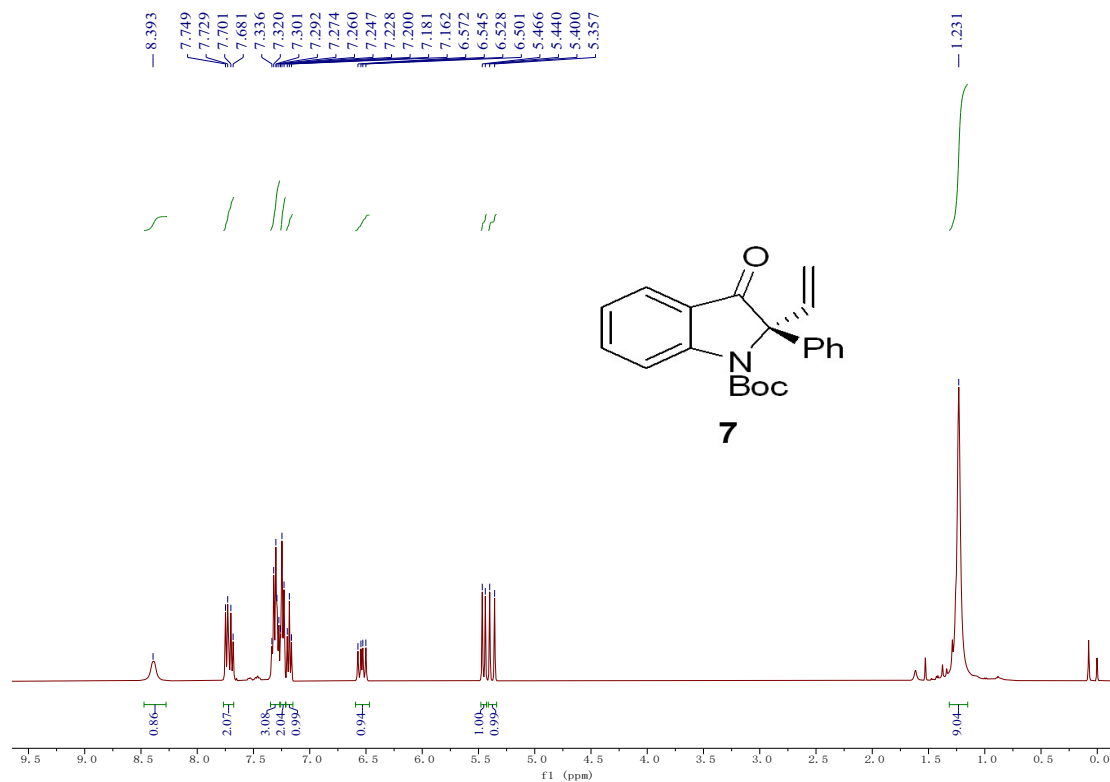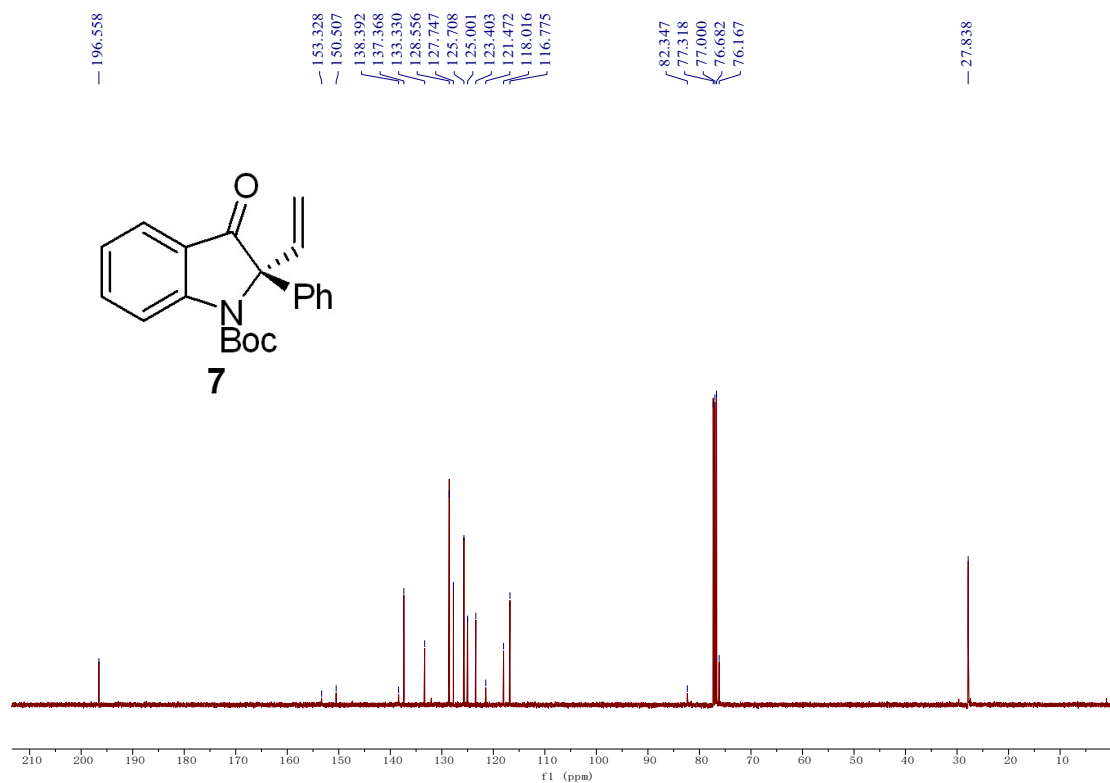

<sup>1</sup>H and <sup>13</sup>C NMR spectra of compound 7 (400 MHz, CDCl<sub>3</sub>)

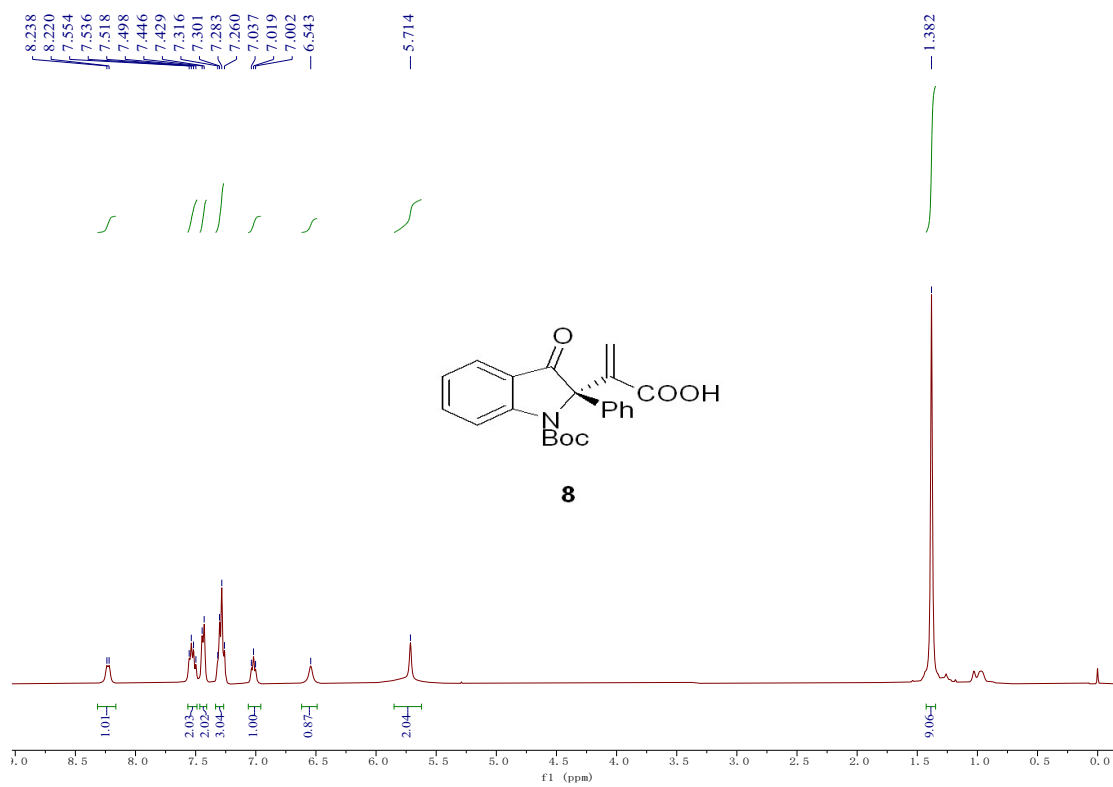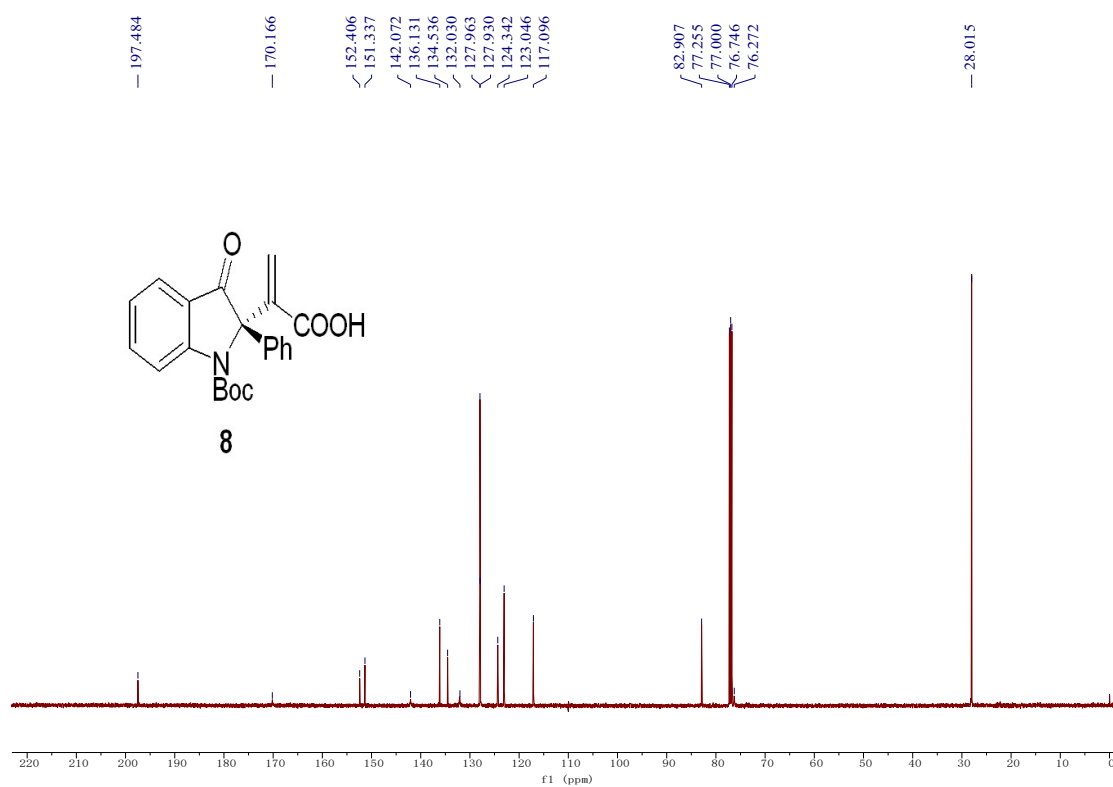

<sup>1</sup>H and <sup>13</sup>C NMR spectra of compound **8** (400 MHz, CDCl<sub>3</sub>)

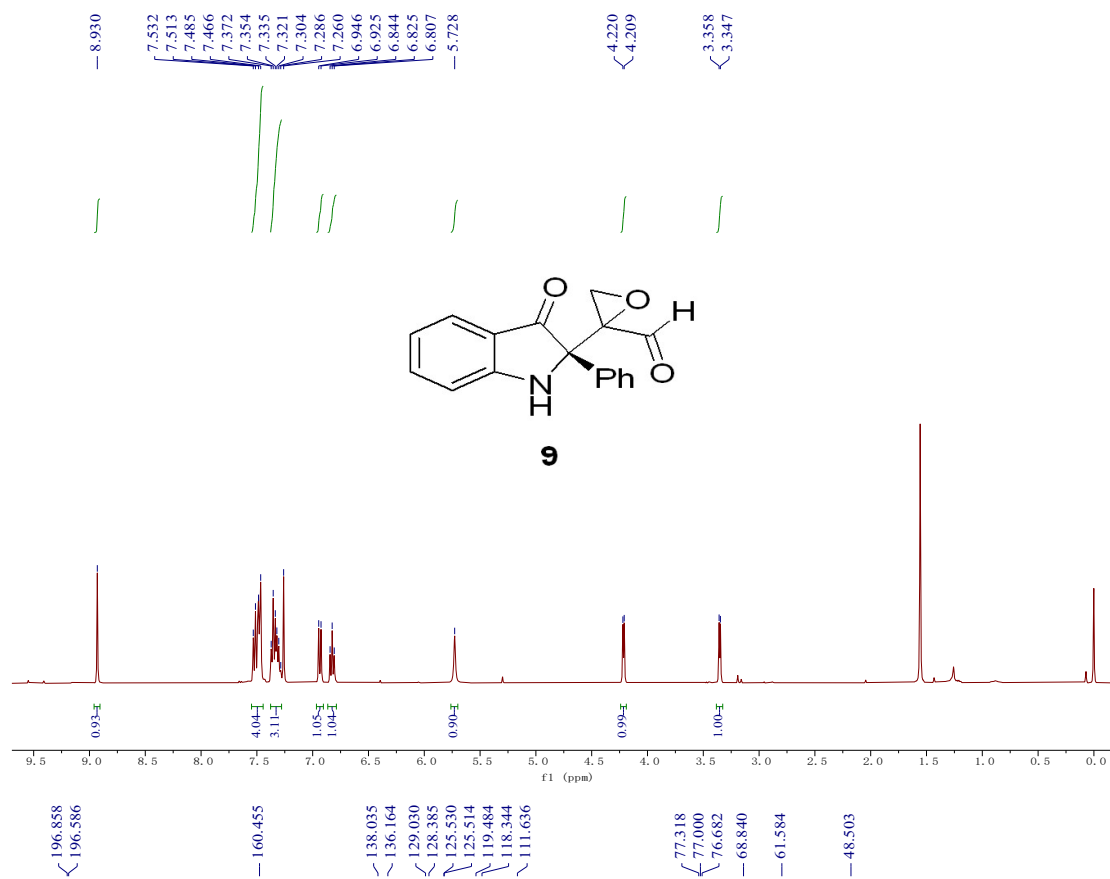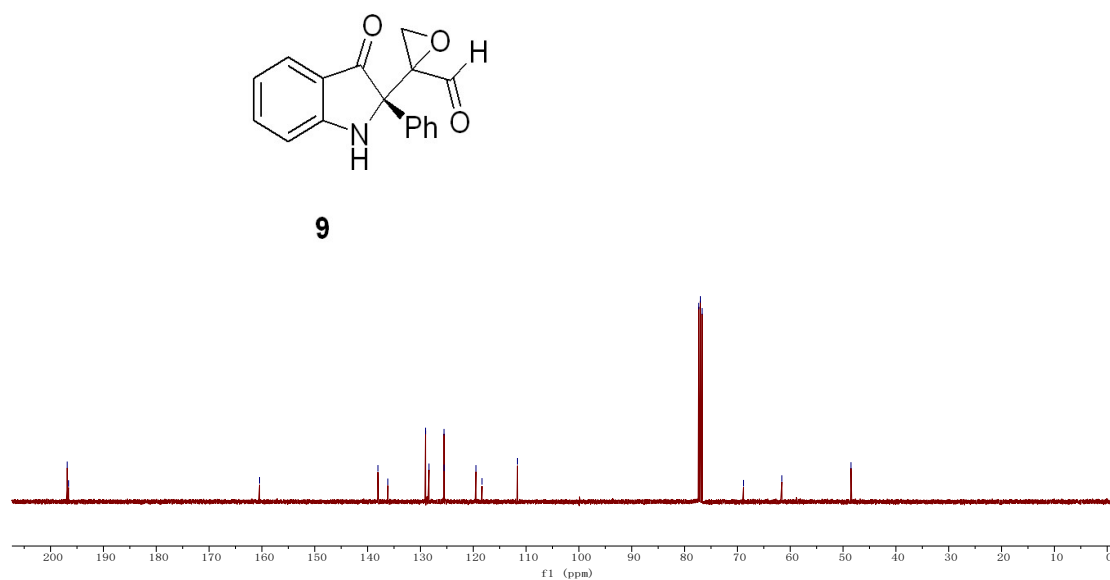

**<sup>1</sup>H and <sup>13</sup>C NMR spectra of compound 9**

## 8. Tertiary amine catalyzed the reaction

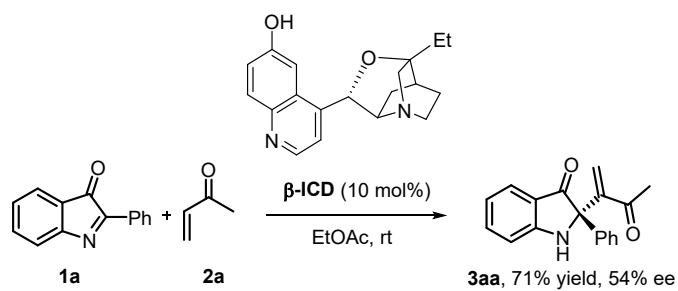

To a solution of compound **1a** (0.1 mmol, 1.0 equiv.) and tertiary amine catalyst  $\beta$ -ICD (0.01 mmol, 0.1 equiv.) in ethyl acetate (2.0 mL) was added compound **2a** (0.15 mmol, 1.5 equiv.) under nitrogen atmosphere at room temperature. TLC monitor until the compound **1a** consumed after six hours. The reaction mixture was then concentrated on a rotary evaporator under reduce pressure and the residue was subjected to purification by column chromatography (silica gel, PE/EtOAc: 15/1 to 10/1,  $R_f$  = 0.2-0.3) to afford the corresponding product **3aa** in 71% yield with 54% ee.
